# Supplementary material for: Coconut genome assembly enables evolutionary analysis of palms and highlights signaling pathways involved in salt tolerance
Source: PubMed Central journal article supplement (PMC7822834; doi:10.1038/s42003-020-01593-x), 2021-01-22
Supplement: 42003_2020_1593_MOESM2_ESM.pdf [file 42003_2020_1593_MOESM2_ESM.pdf]

# Coconut genome assembly enables evolutionary analysis of palms and highlights signaling pathways involved in salt tolerance.

Yaodong Yang, Stéphanie Bocs, Haikuo Fan, Alix Armero, Luc Baudouin, Pengwei Xu, Junyang Xu, Dominique This, Chantal Hamelin, Amjad Iqbal, Rashad Qadri, Lixia Zhou, Jing Li, Yi Wu, Zilong Ma, Auguste Emmanuel Issali, Ronan Rivallan, Na Liu, Wei Xia, Ming Peng, Yong Xiao

## Supplementary information

## Contents

|                                                                                                     |           |
|-----------------------------------------------------------------------------------------------------|-----------|
| <b>1. Assessment of linkage map and assembly</b>                                                    | <b>3</b>  |
| <i>Figure S1: Histogram of the protein length in HAIT and in CATD.</i>                              | 3         |
| <i>Figure S2: Dot plot of the linkage between loci of the 16 linkage groups</i>                     | 4         |
| <i>Figure S3: Recombination, gene and marker landscapes</i>                                         | 5         |
| <i>Figure S4: Comparison between HAIT linkage mapping and CATD Hi-C mapping</i>                     | 13        |
| <b>2. palm comparative genomics</b>                                                                 | <b>14</b> |
| <i>Figure S5: Coconut paralogy</i>                                                                  | 14        |
| <i>Figure S6: Mapping of coconut duplicated genes onto the putative pre-p ancestor</i>              | 15        |
| <i>Figure S7: Synteny between coconut and oil palm</i>                                              | 16        |
| <b>3. Gene regulation in coconut leaves during salt stress</b>                                      | <b>17</b> |
| <i>Supplementary Note 1</i>                                                                         | 17        |
| <i>Figure S8: Signaling pathways in coconut leaves during salt-water stress</i>                     | 19        |
| <i>Figure S9a: 1<sup>st</sup> animated fig: RNA-Seq expression at 4 h during salt-water stress</i>  | 20        |
| <i>Figure S9b: 2<sup>nd</sup> animated fig: RNA-Seq expression at 6 d during salt-water stress</i>  | 21        |
| <i>Figure S9c: 3<sup>rd</sup> animated fig: RNA-Seq expression at 10 d during salt-water stress</i> | 22        |
| <i>Figure S10: MT3 gene family (ROS signalling pathway)</i>                                         | 23        |
| <i>Figure S11: Expression of the ABA-ABAI pathway in coconut leaves under salt stress</i>           | 24        |
| <i>Figure S11: Expression of the ABA-ABAI pathway in coconut leaves under salt stress</i>           | 25        |
| <b>4. GBS processing pipeline</b>                                                                   | <b>27</b> |
| <i>Figure S12: Tassel 5 GBS v2 Pipeline</i>                                                         | 27        |
| <i>Table S1: Parameters used with TASSEL</i>                                                        | 28        |
| <i>Table S2: Parameters used with Process reseq</i>                                                 | 29        |
| <i>Table S3: Parameters used with VCF filter</i>                                                    | 29        |
| <i>Table S4: Parameters used with Tassel_to_J and Joinmap</i>                                       | 29        |
| <i>Table S5: Parameters used with Scaffhunter</i>                                                   | 30        |
| <b>5. RNA-Seq analysis bioinformatics pipeline</b>                                                  | <b>31</b> |
| <i>Figure S13: RNA-Seq analysis bioinformatics workflow</i>                                         | 31        |
| <b>6. REFERENCES</b>                                                                                | <b>32</b> |

## 1. Assessment of linkage map and assembly

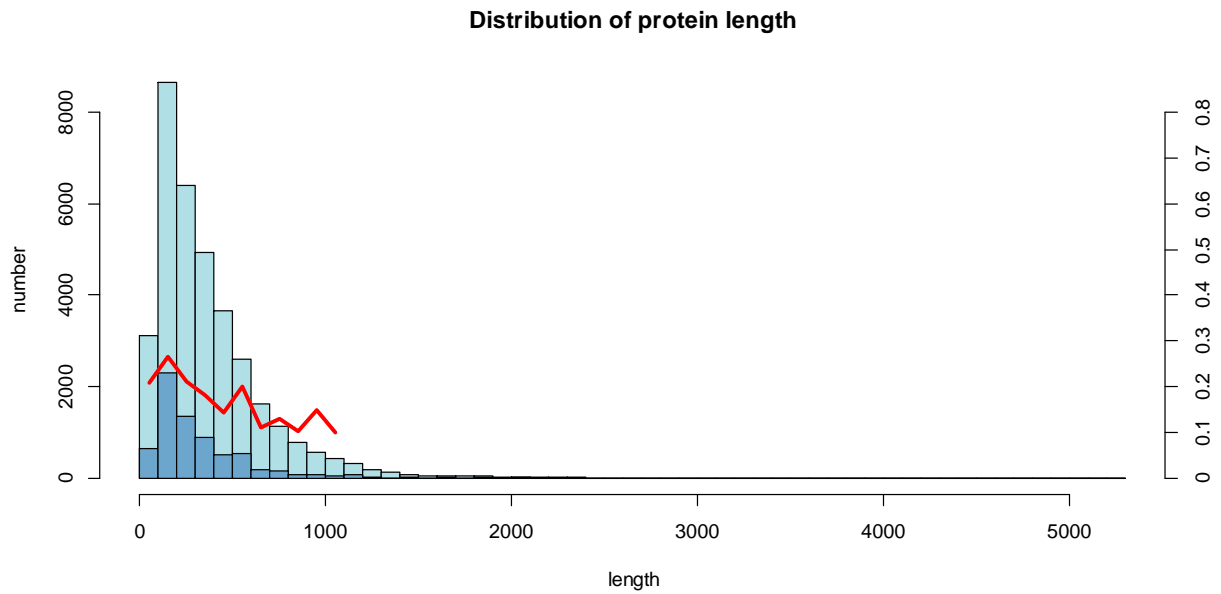

*Figure S1: Histogram of the protein length in HAIT and in CATD.*

Bin size = 100 bp. The height of the bars is the number of proteins in the CATD (C), the pale blue segment is the number of proteins in the HAIT (H). The dark blue segments represent the additional proteins in CATD. The red line is  $D = (C - H) / C$  for length < 1,200 (scale to the right). CATD tend to have more proteins of small size but the effect of size is limited (+25% around 100 bp, +10% around 1,000).

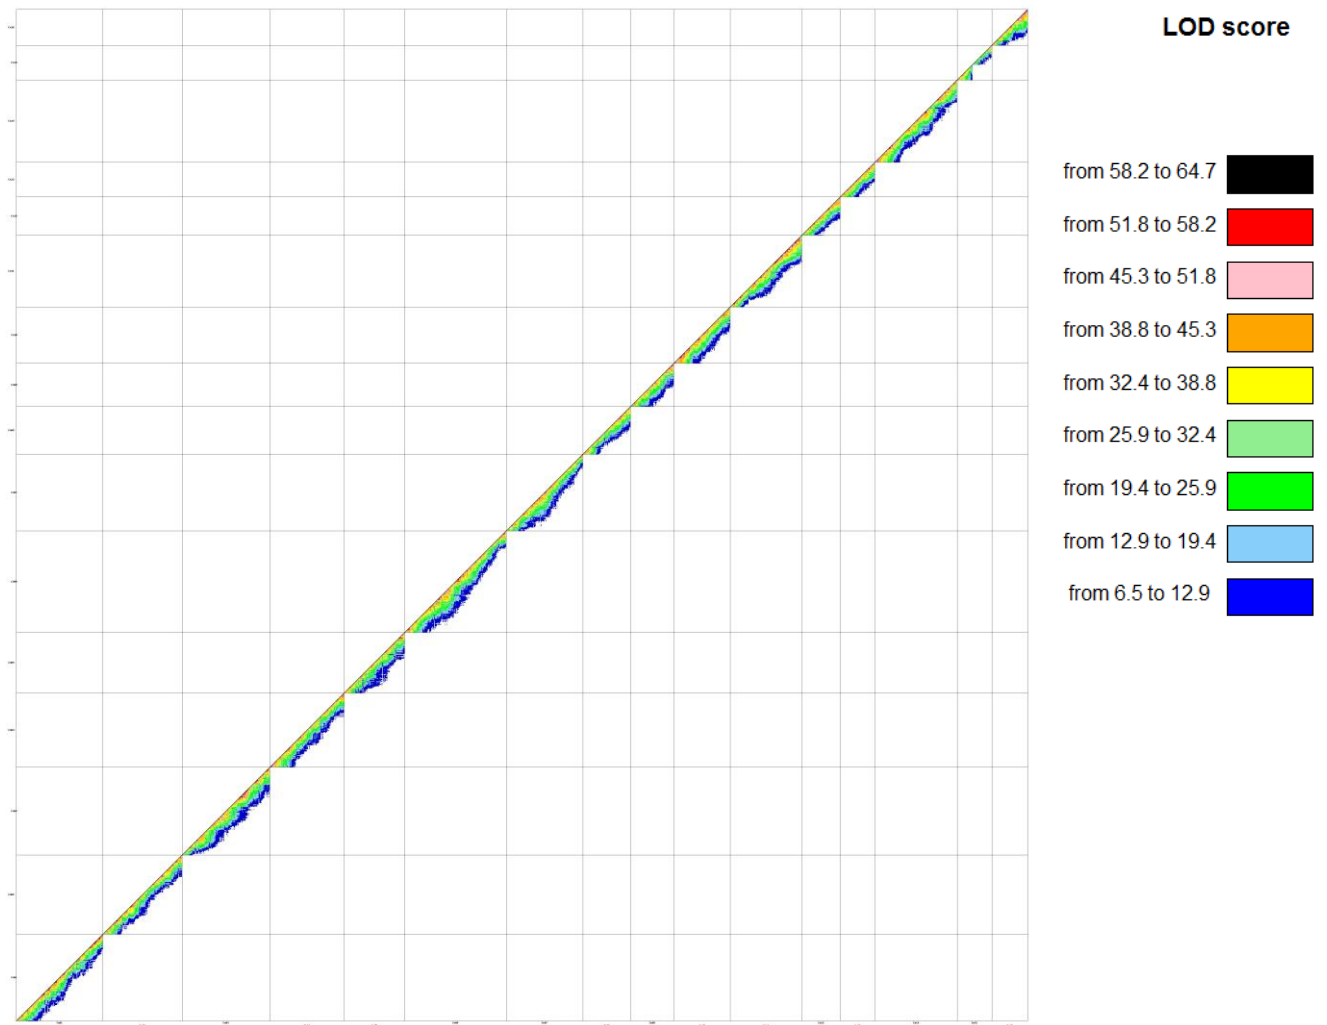

Figure S2: Dot plot of the linkage between loci of the 16 linkage groups

Figure S3: Recombination, gene and marker landscapes

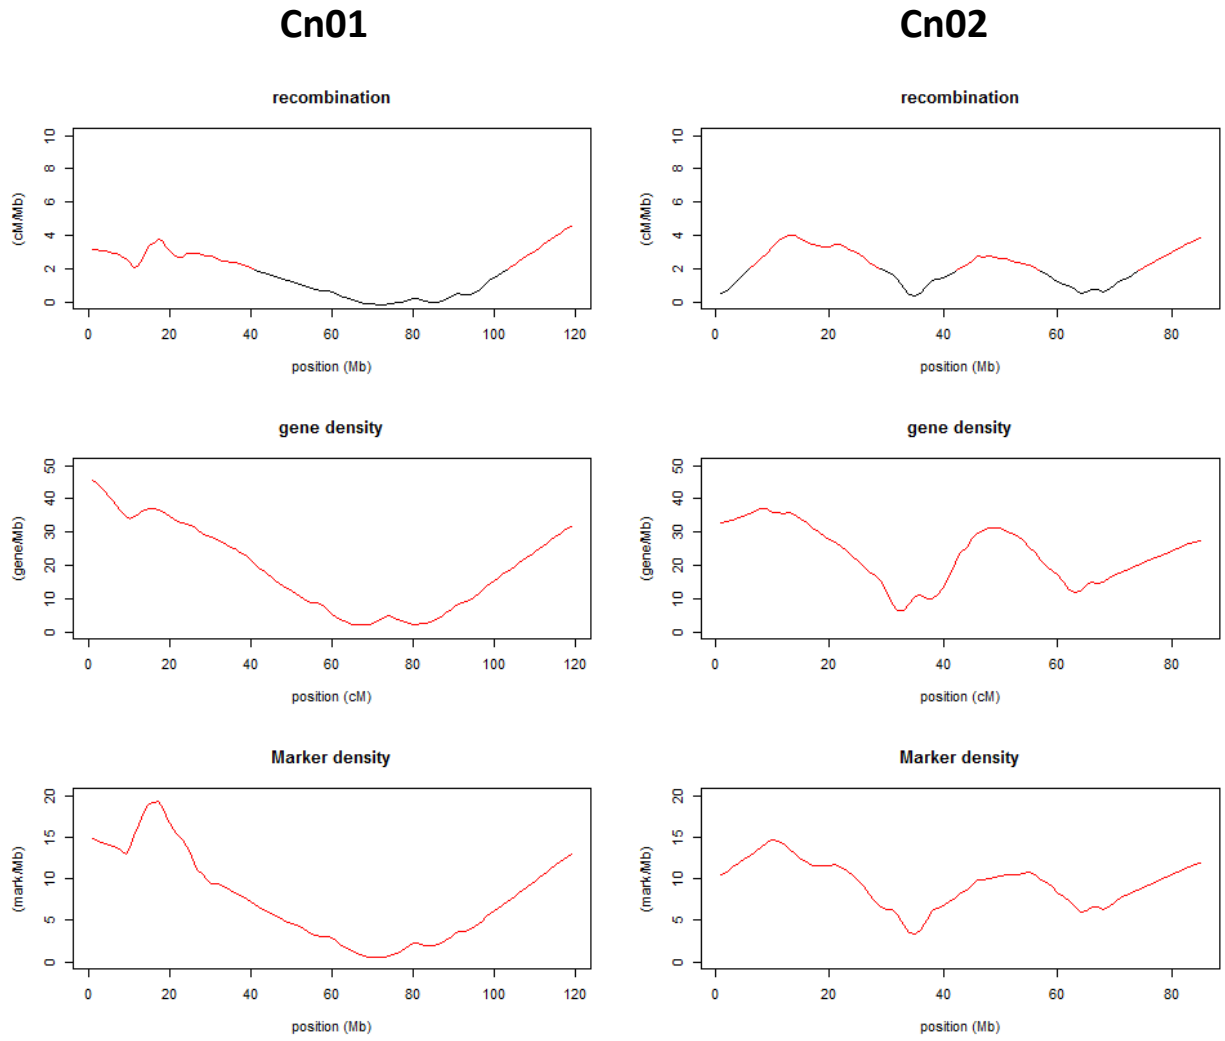

Figure S3 continued

### Cn03

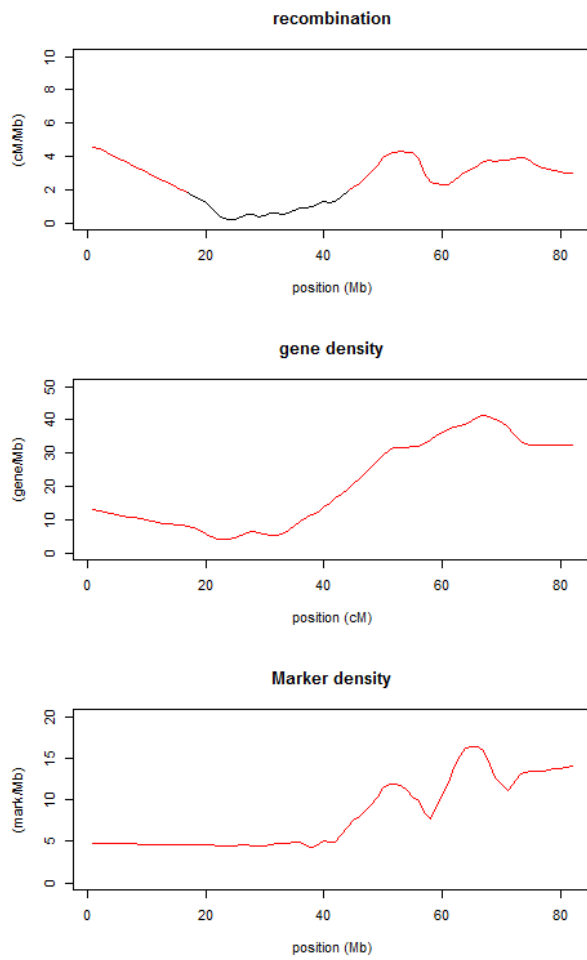

### Cn04

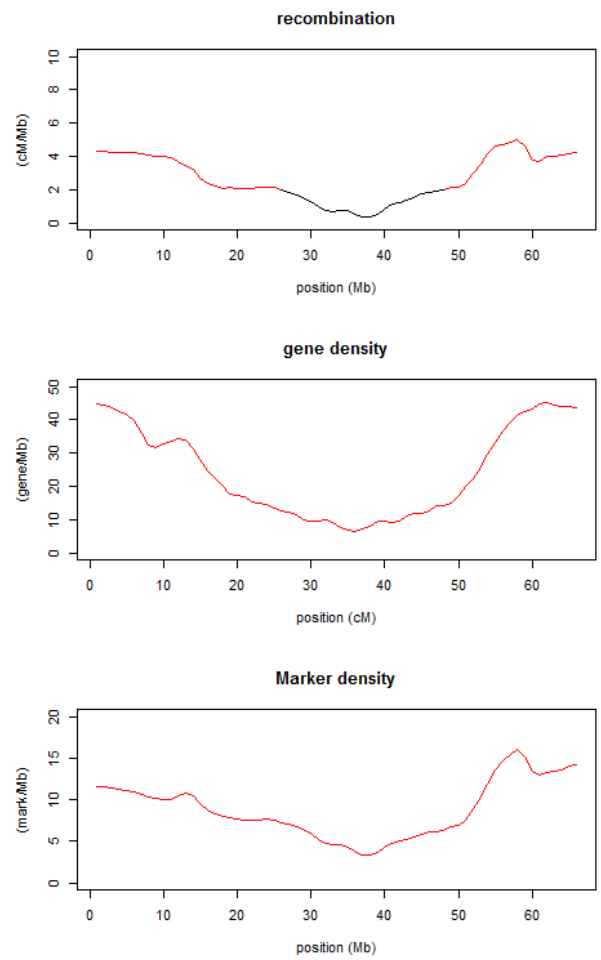

Figure S3 continued

## Cn05

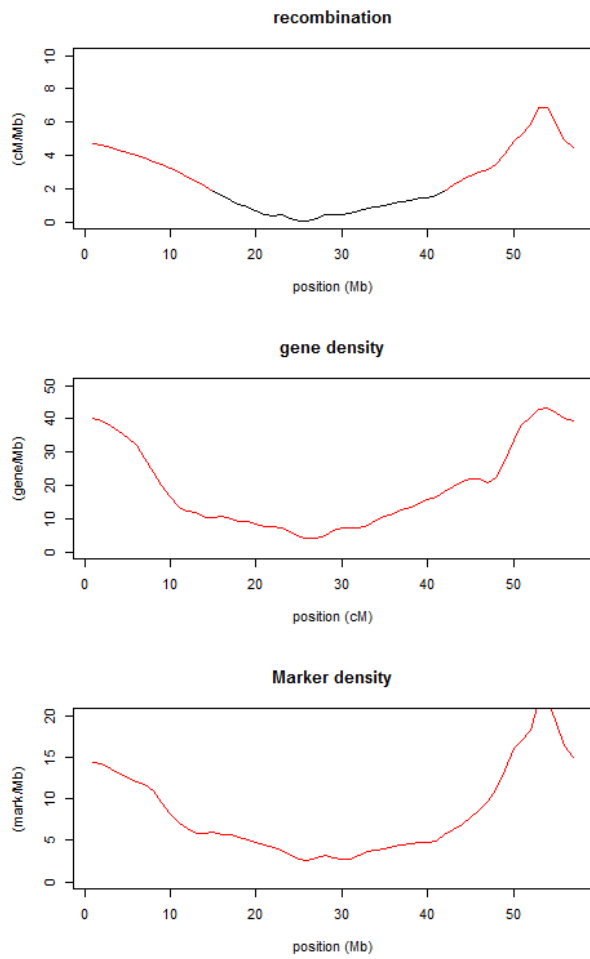

## Cn06

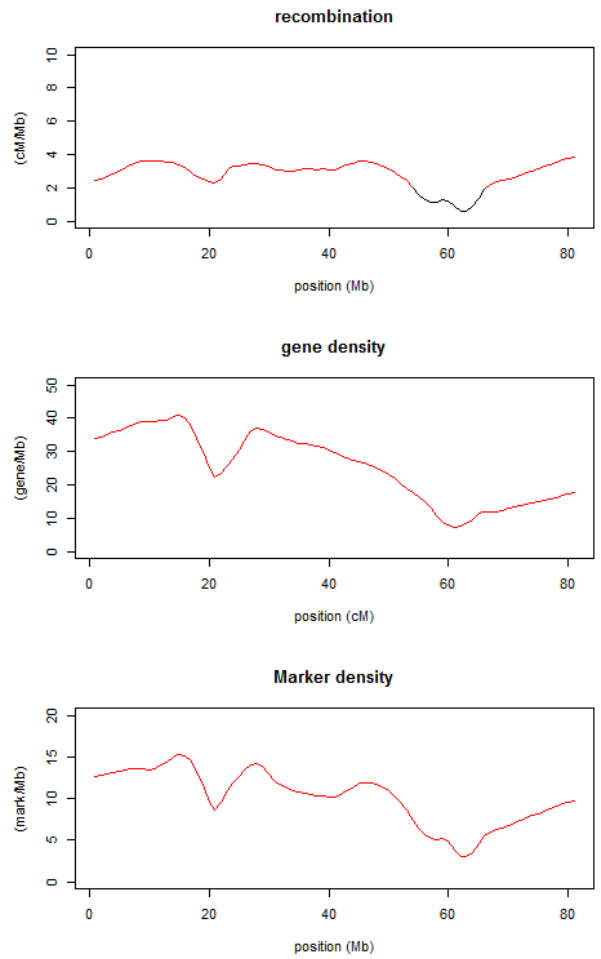

Figure S3 continued

### Cn07

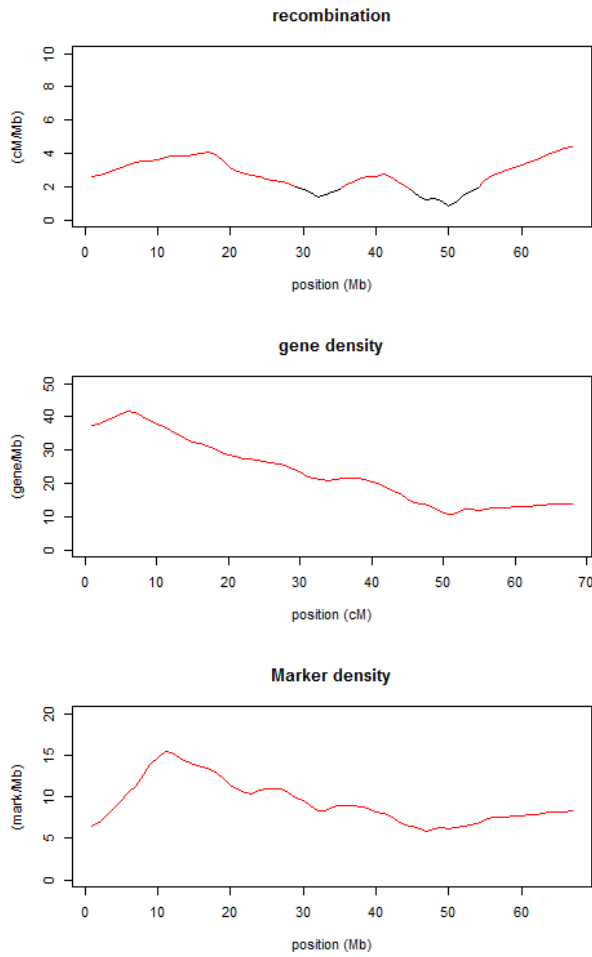

### Cn08

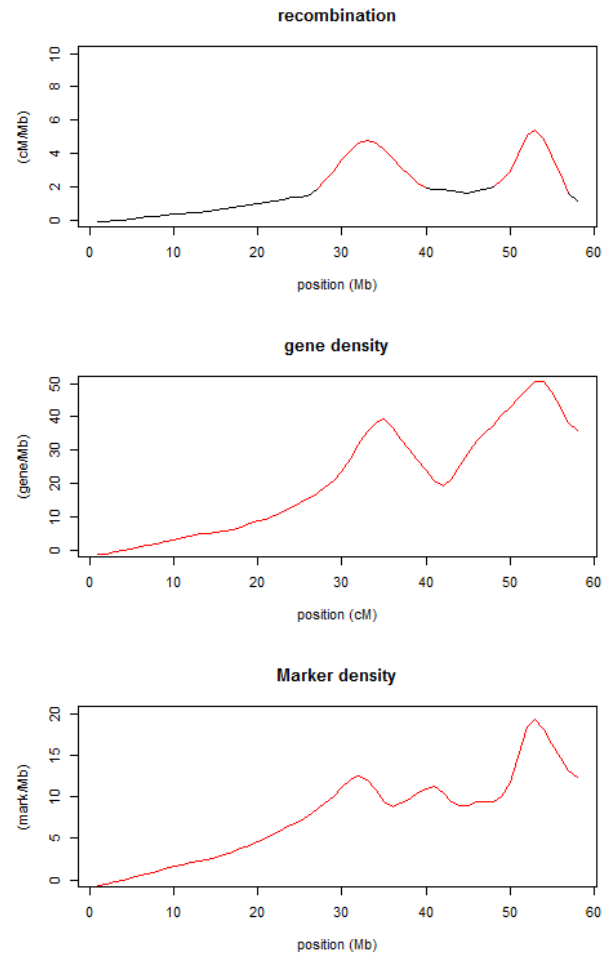



Figure S3 continued

### Cn09

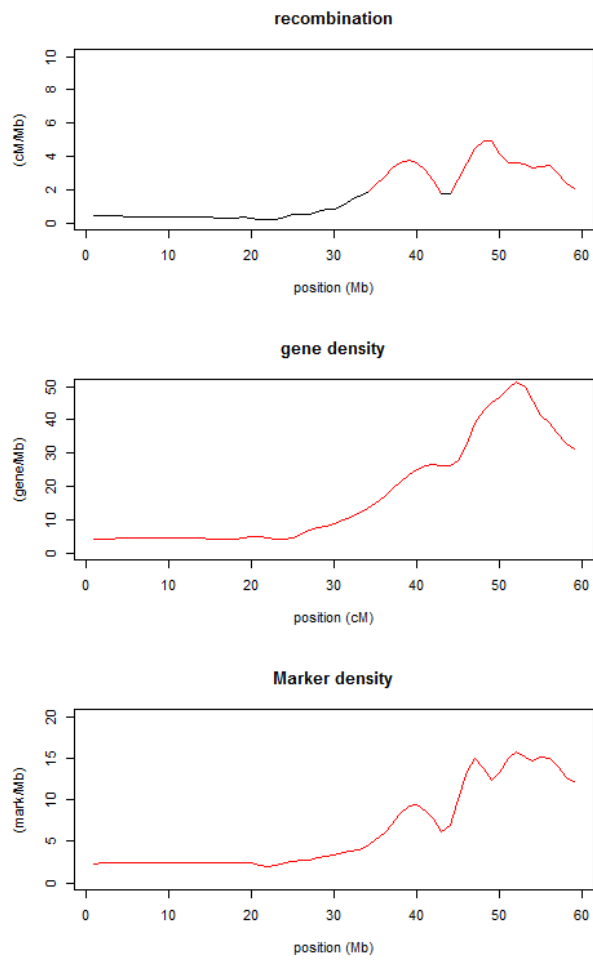

### Cn10

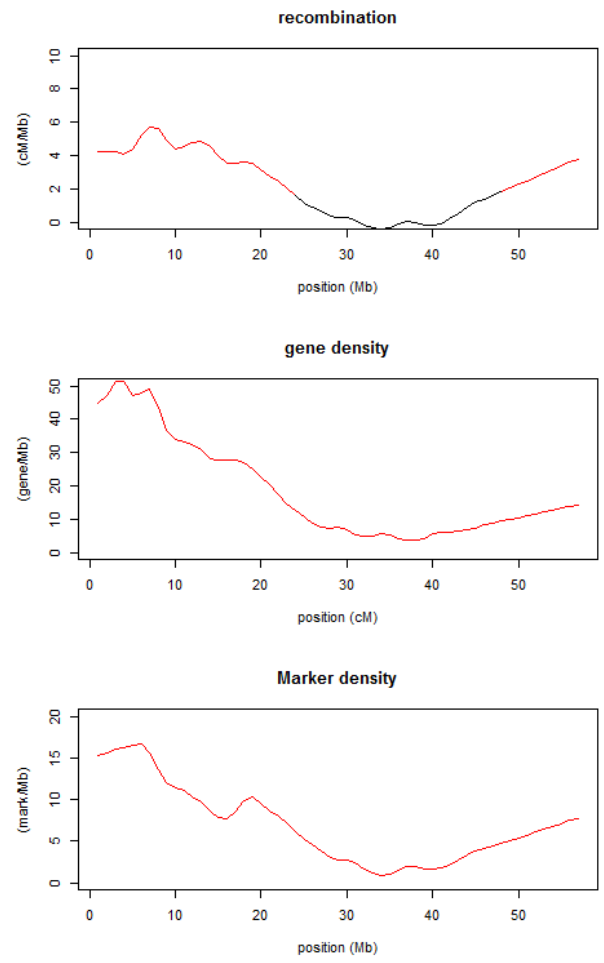

Figure S3 continued

### Cn11

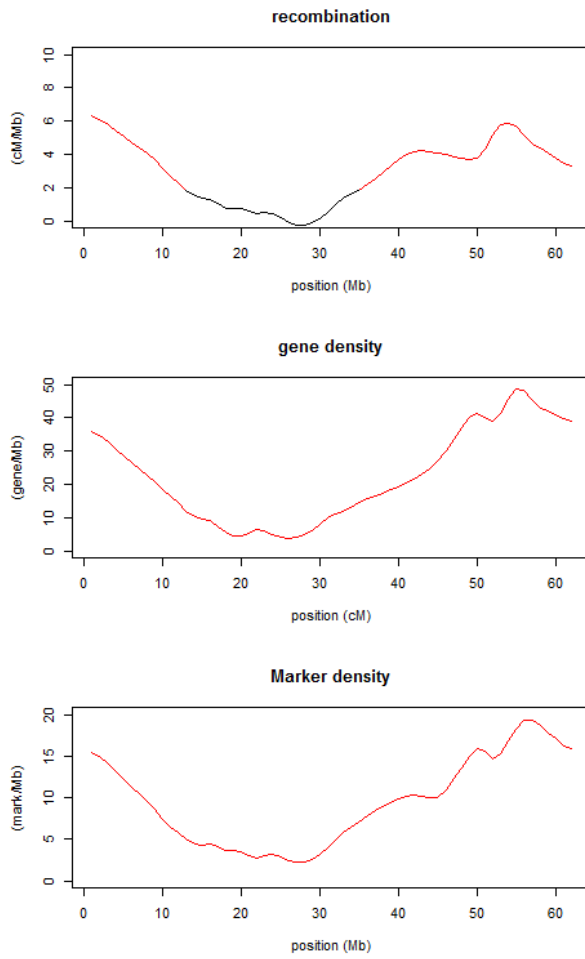

### Cn12

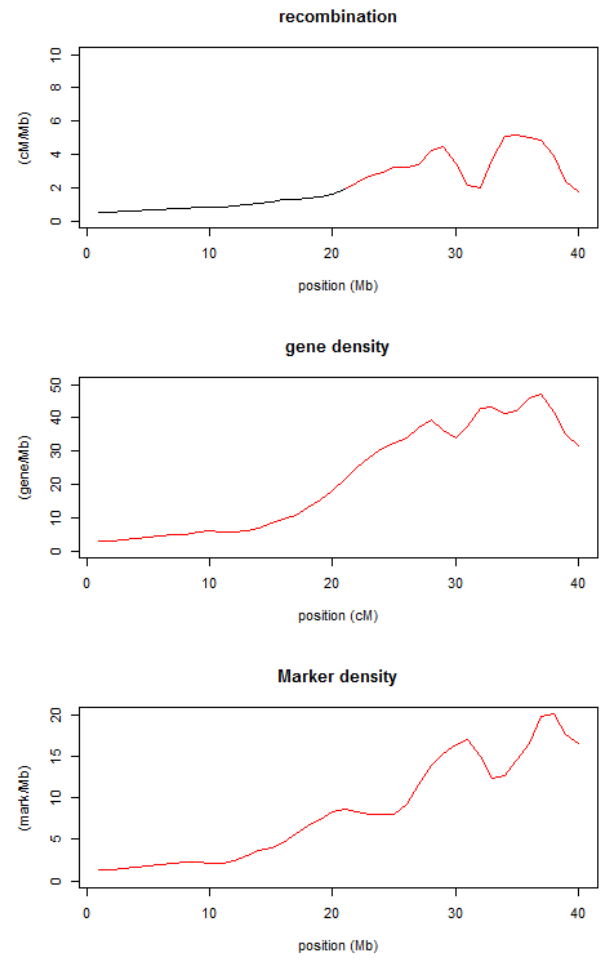

Figure S3 continued

### Cn13

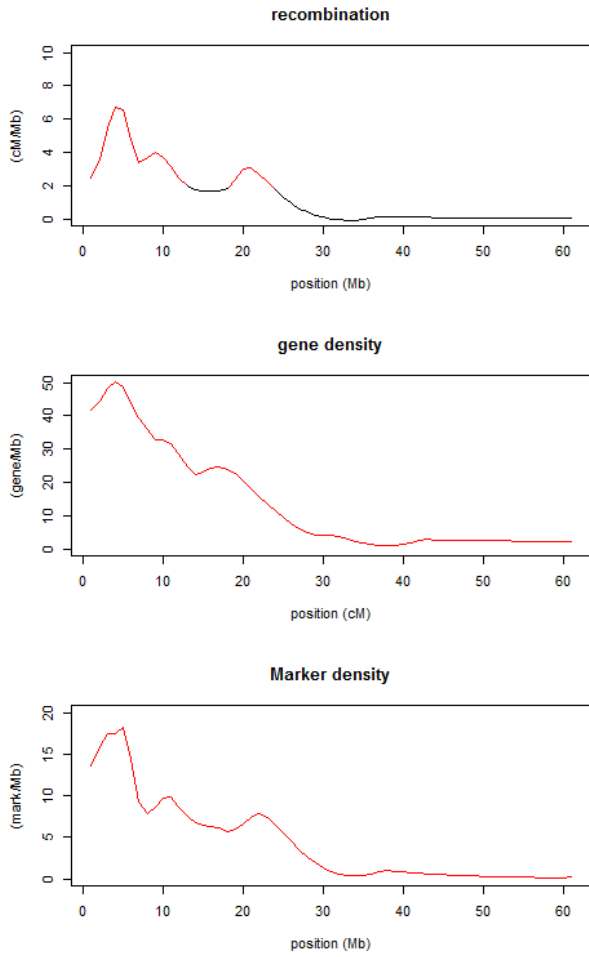

### Cn14

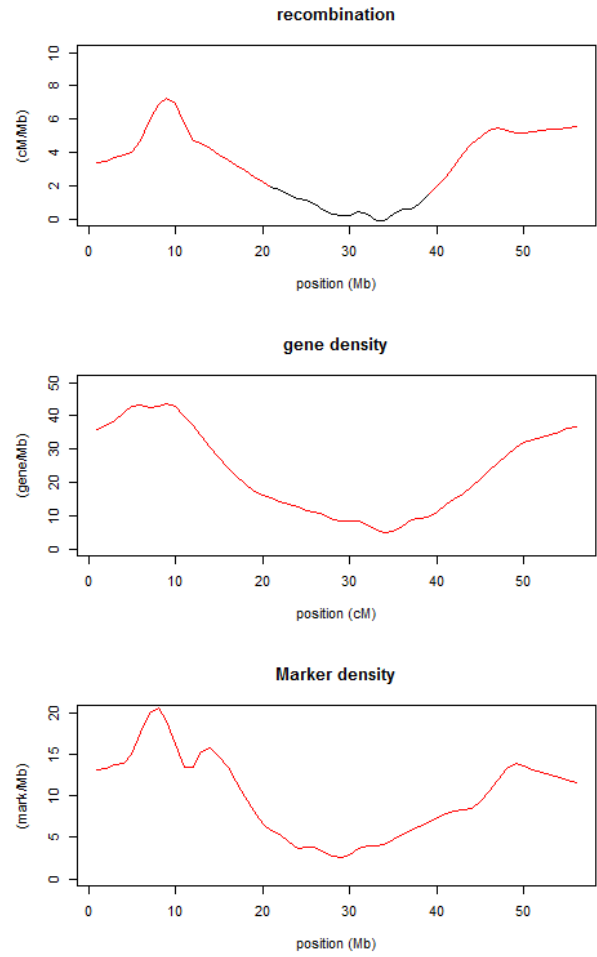

Figure S3 continued

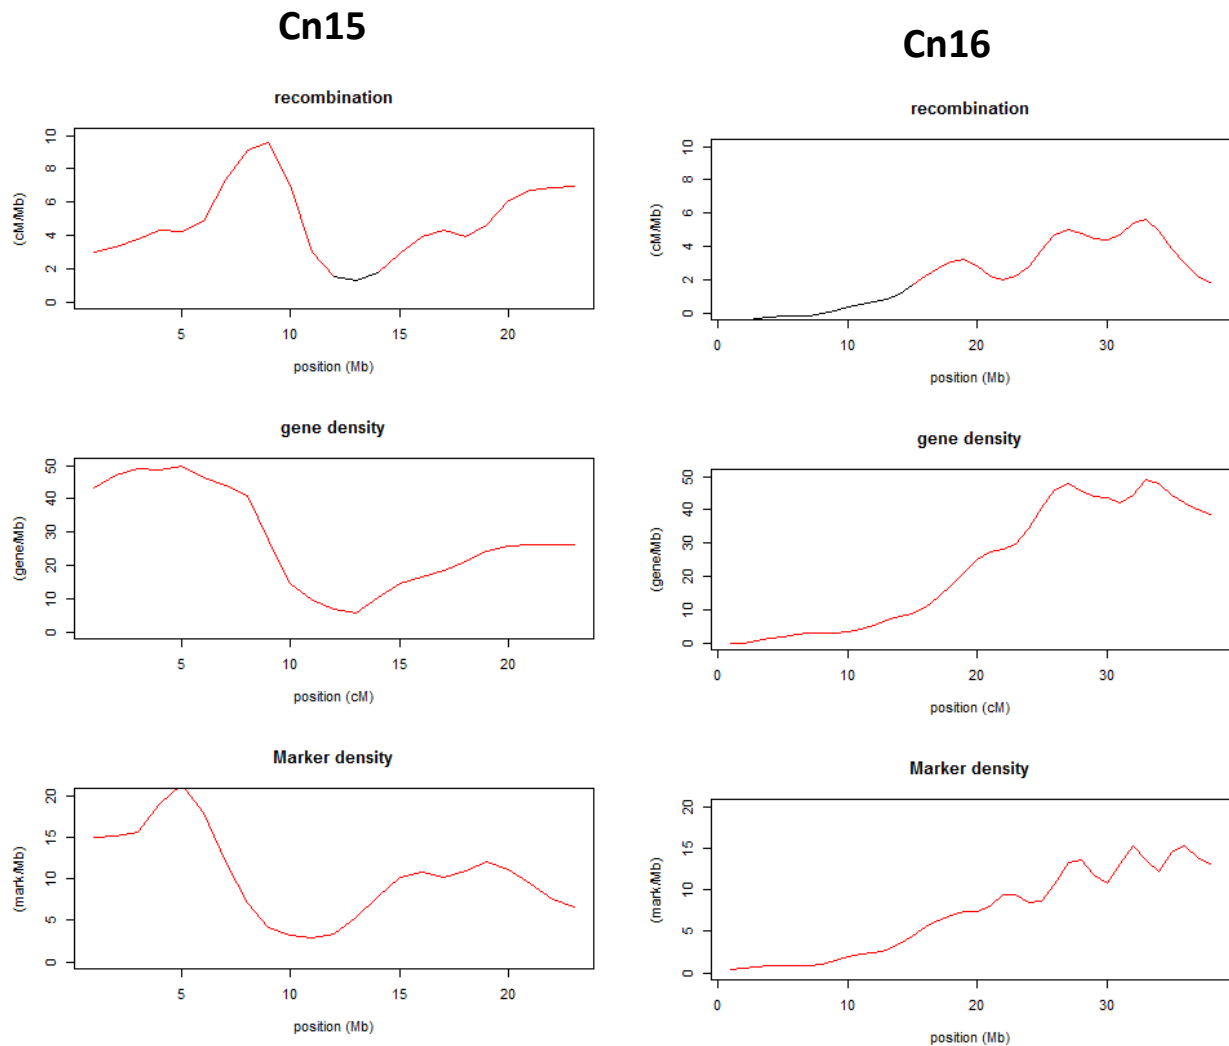

Figure S3: Recombination, gene and marker landscapes

The 16 figures below consists in three panels per linkage group, respectively the recombination rate (in cM/Mb), the density of genes and marker density. Regions with less than 2 cM/Mb (marked in black in the first panel) correspond approximately to heterochromatin, have fewer genes and markers than euchromatin and are likely to be underrepresented in the current version of the sequence. Note the presence of deep “valleys” around 60 Mb on Cn02 and around 40 Mb on Cn08, corresponding to chromosome fusions occurring after divergence from oil palm. Note that, due to incomplete assembly in heterochromatin, values tend to be overestimated in these regions.

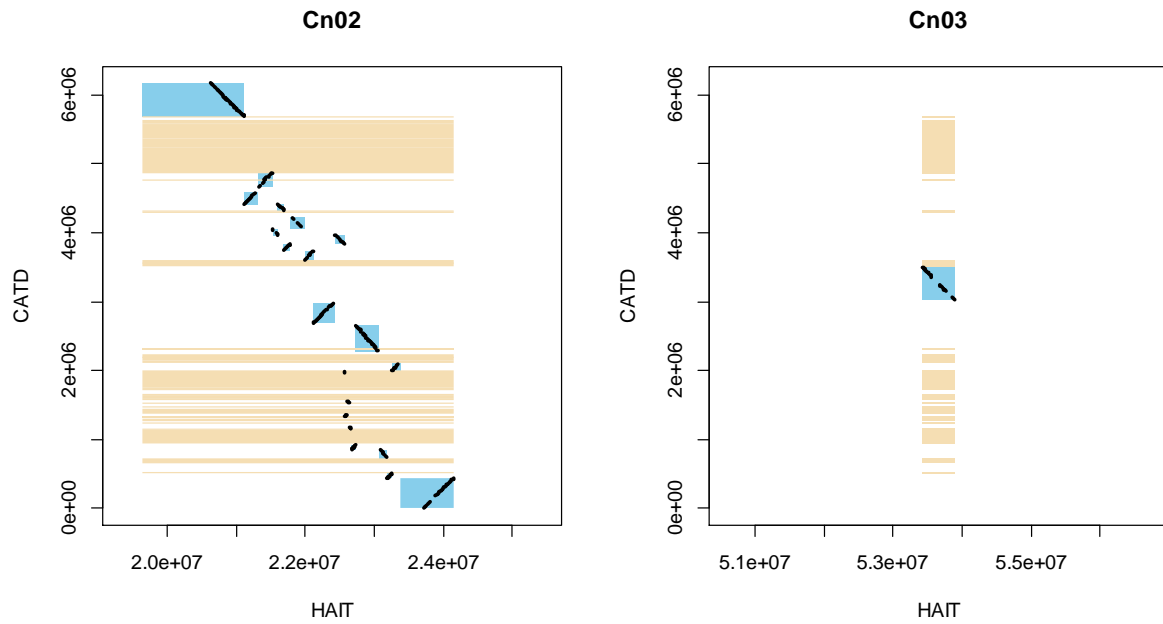

*Figure S4: Comparison between HAIT linkage mapping and CATD Hi-C mapping*

Matches between one of the largest scaffolds of the CATD sequence (cultivar Catigan Green Dwarf; D0, y axis) and pseudomolecules produced by linkage mapping on HAIT (coconut cultivar Hainan Tall; x axis) are represented by black dots. The blue squares correspond to anchored HAIT scaffolds (two of them extend beyond D0). Most of them belong to Cn02, but the Hi-C mapping also recruited one scaffold from Cn03, thus creating a chimeric scaffold. The orders of scaffolds on Cn02 and on D0 are similar but not identical. This could be due in part to statistical uncertainty in recombination rates. A large number of small unassembled HAIT scaffold match on D0 and are represented by beige rectangles.

## 2. palm comparative genomics

**a**

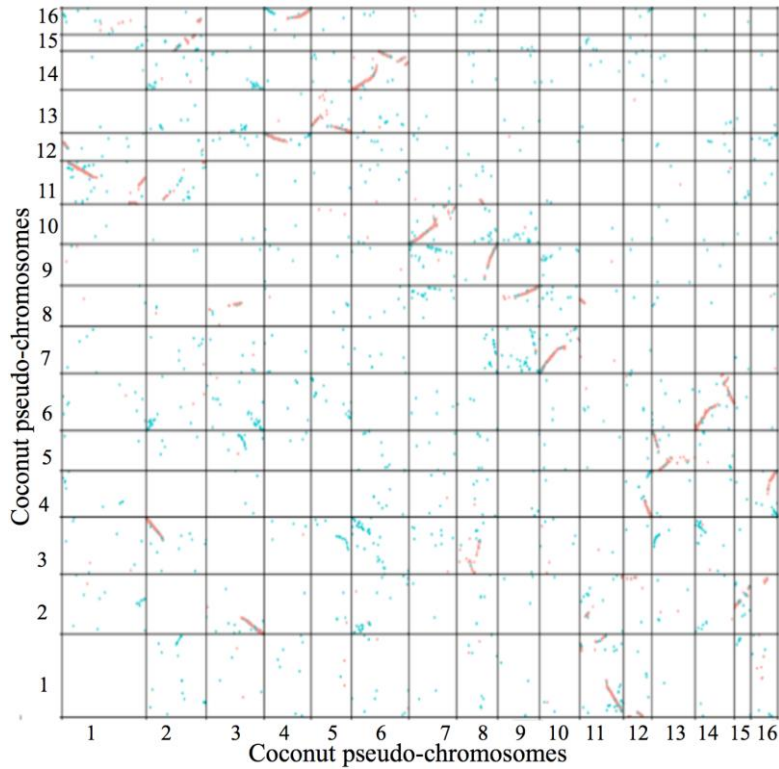

**b**

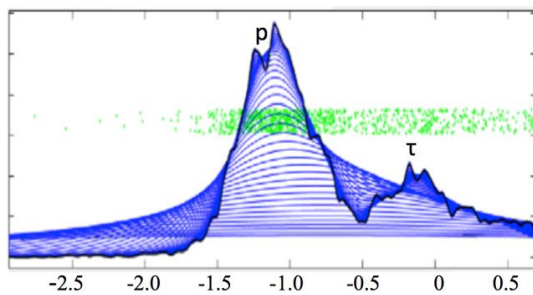

**c**

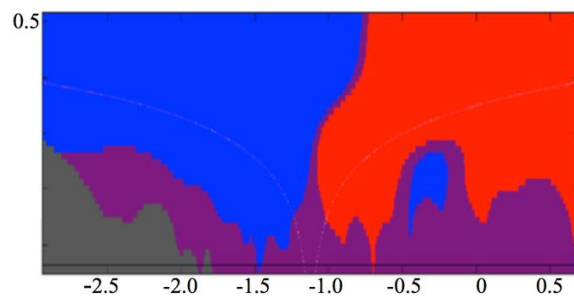

*Figure S5: Coconut paralogy*

(a) Relations of syntenic paralogy between coconut polypeptides. The red dots are pairs of paralog products of the  $p$  WGD, while the blue dots represent the  $\tau$  whole genome duplication (WGD).

(b) Distribution of the natural logarithm of  $dS$  of aligned CDS pair. The two peaks represent the two WGDs.

(c) Sizer map of  $\log dS$  distribution. The blue zones represent significant increases in slope, red areas significant decrease and areas purple slopes close to zero.

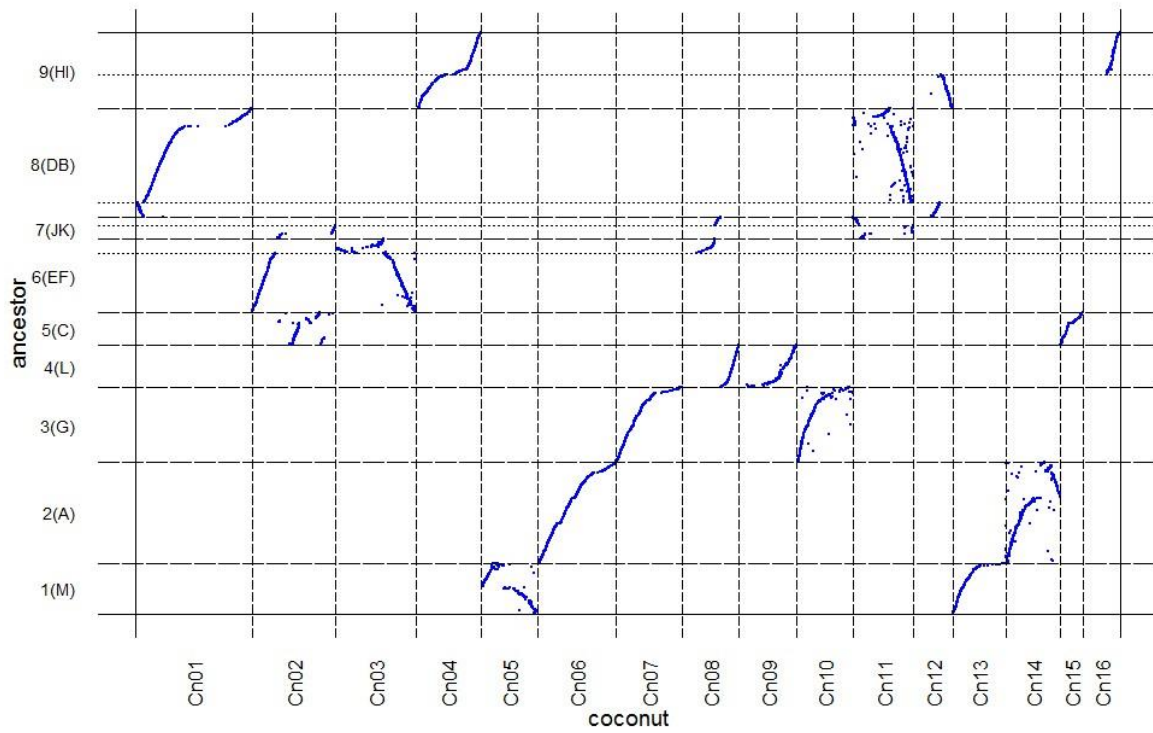

*Figure S6: Mapping of coconut duplicated genes onto 9 chromosomes of the putative pre-p ancestor*  
 The syntenic blocs can be identified by referring to figure 4 (E.g. block B is shared between Cn01 and Cn11).

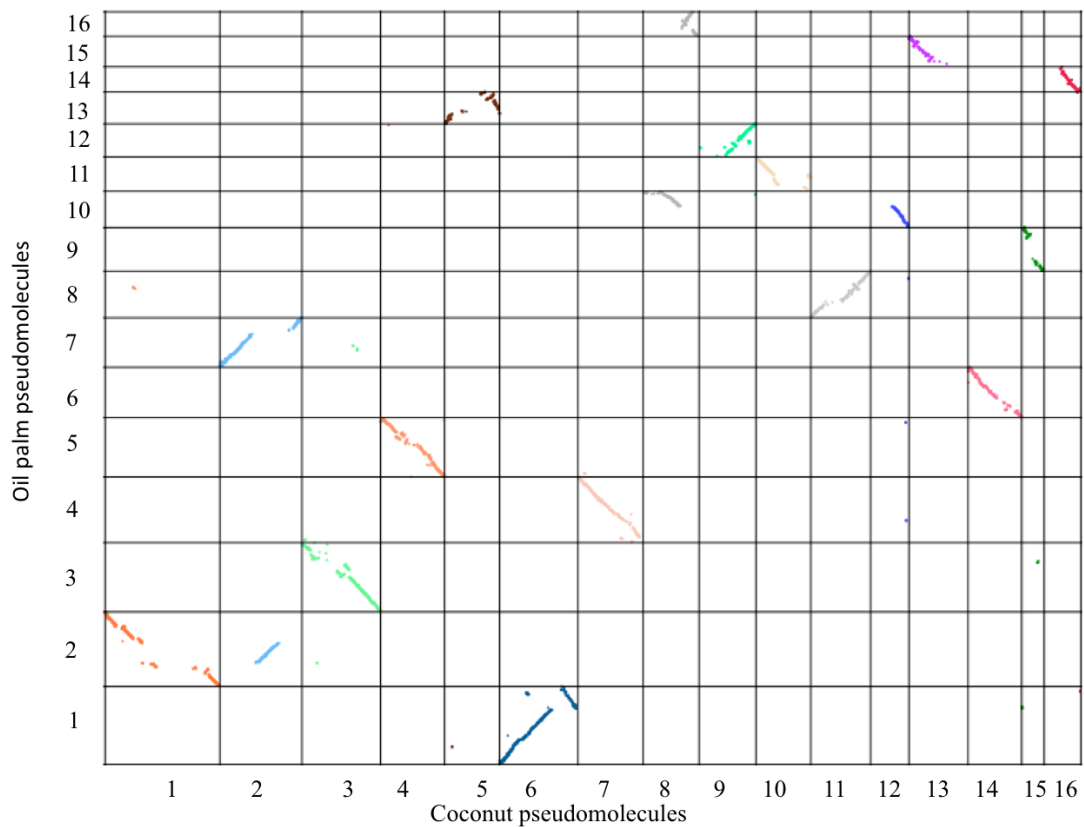

*Figure S7: Syteny between coconut and oil palm*

Relations of syntenic orthology between *Elaeis guineensis* and *Cocos nucifera* polypeptides. Each dot corresponds to a pair of orthologous protein sequences. The dots are painted according the coconut chromosomes.



### 3. Gene regulation in coconut leaves during salt stress

#### *Supplementary Note 1*

We provide a synthetic representation of the most important early signaling pathways in Figure S8. Figure S9 represents the evolution of gene expression after 4 hours (S9a), 6 days (S9b) and 10 days (S9c).

Our results, shown in Figure S9, confirmed that coconut leaves were under stress because, out of the four protective effectors considered as salt stress markers in rice by Soda et al.<sup>1</sup>. Transcripts of two stress markers genes were differentially expressed at least at the late stage: metallothionein MT3 with expression class number (ECN) 62 and grey stars on Figure 6 and S10, and a dehydrin (DHN), of the Late Embryogenesis Abundant (LEA) family with ECN 13 and a grey star on Figure S11. Another dehydrin ERD10 (early response to dehydration with ECN 16 and grey stars on Figure S11) exhibited the same tendency although below the significance threshold. Regarding the fourth one, Glutathione S-transferase (GST), ECN 35, grey stars on Figure 6), three copies were CHE. Constitutive high expression of GSTs could be interpreted as a coconut halophytic feature as suggested in previous papers<sup>2,3</sup>.

As a complement to the results given in the article, we focus here on key players of the abscisic acid (ABA) dependent early signaling pathway (Figure S11). A decrease of PP2C (Protein phosphatase 2C with ECN 2 and yellow stars in Figures S11a and S11c) could enhance ABA signaling which triggers several responses such as expression regulation of transcription factors involved in synthesis of protective molecules (*e.g.* CAPRICE, or CPC with ECN 5 and a yellow star on Figure S11d) or in flowering time (*e.g.* CONSTANS-LIKE, or COL with ECN 4 and yellow stars on Figure S11e) and thus contributes to the osmotic homeostasis<sup>4</sup>.

Among the studied players of the Ca<sup>2+</sup>/PLC signaling pathway, none were observed differentially expressed at the early stage (CN01\_scaffold078790G000010 PLD ECN 37 was observed differentially expressed only during the late stage; Supplementary Data 3).

Regarding reciprocal **crosstalks** (coloured arrows) between ROS and ABA signaling pathways during salt-water shock in coconut leaves, RBOHF activated by Ca<sup>2+</sup> produces ROS; among which, H<sub>2</sub>O<sub>2</sub>, activates the ABA biosynthesis<sup>5</sup> and deactivates PP2C<sup>9</sup> that was already repressed by ABA. In turn, SNRK2 activates RBOHF<sup>6</sup> and stomatal closure triggered by ABA compromises photosynthesis with H<sub>2</sub>O<sub>2</sub> production in the chloroplast.

The most striking observations about transcriptional regulation of key players 4h after the salt-water shock are:

PP2C hub repressor gene is underexpressed. On top of it, H<sub>2</sub>O<sub>2</sub><sup>9</sup> inactivates it. Both effects tend to overexpress several ABA early signalling pathway players such as the MYB CPC transcription factor. This contributes to enhance ABA biosynthesis at a later stage along with Ca<sup>2+</sup> and H<sub>2</sub>O<sub>2</sub><sup>6</sup>.

We also note a transcriptional overexpression of SODC, activator of ROS early signalling. Other factors are likely to enhance this signalling pathway: RBOH activation by Ca<sup>2+</sup>, CIPK26, SNRK2<sup>6</sup>, photosynthesis reduction due to stomatal closure<sup>10</sup>.

Regarding ionic stress signaling, PM-AKT (orthologous to AKT2\_ARATH) could be the sodium sensor<sup>11,12</sup> that activates the Ca<sup>2+</sup>/PLC signaling that activates in turn the SOS or CAM signaling<sup>13</sup> (being under both regulations: osmotic with calcium signature and ionic for Na<sup>+</sup> signature) that activates and induces bHLH and AKT2 that adjusts the Na<sup>+</sup>/K<sup>+</sup> ratio to keep it low and triggers stomatal opening.

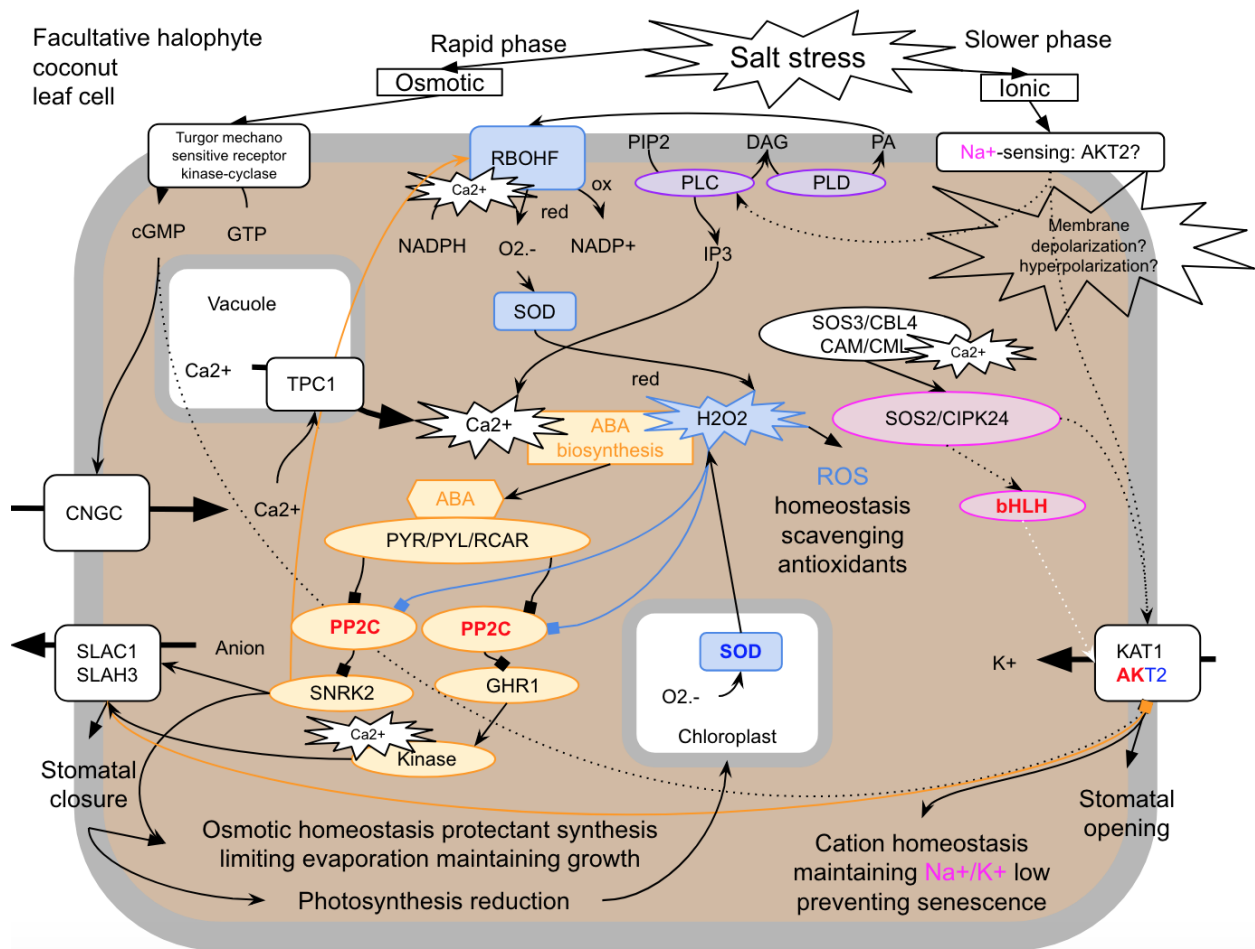

*Figure S8: Signaling pathways in coconut leaves during salt-water stress*

Four main pathways are modelled based on previous studies<sup>4-8</sup> to signal osmotic stress with ABA dependent (golden yellow) and ionic stress  $\text{Ca}^{2+}$ /PLC (purple) and SOS (magenta). ROS (blue) seems to be a crossroad pathway.  $\text{Ca}^{2+}$  and  $\text{H}_2\text{O}_2$  could be the main signaling molecules. The polypeptides drawn in the shape of (i) a vertical oval represents sensors (e.g. membrane receptors); (ii) a horizontal oval represents signaling molecules such a MAPK cascade, transcription factors, ABA receptors; (iii) a filled rectangle represent inducible transcription activators and stress tolerance effectors and (iv) empty rectangle are phytohormones. Hypothesized links are illustrated with dashed lines. The lines illustrate pathways that are not shown and described in detail. Arrows represent up-regulation of transcriptional expression or activation whereas lines ended with a small square represent down-regulation of transcriptional expression or inhibition. The gene symbols in bold mean that they are differentially expressed at an early time (four hours), either upregulated (in blue) or down regulated (in red).

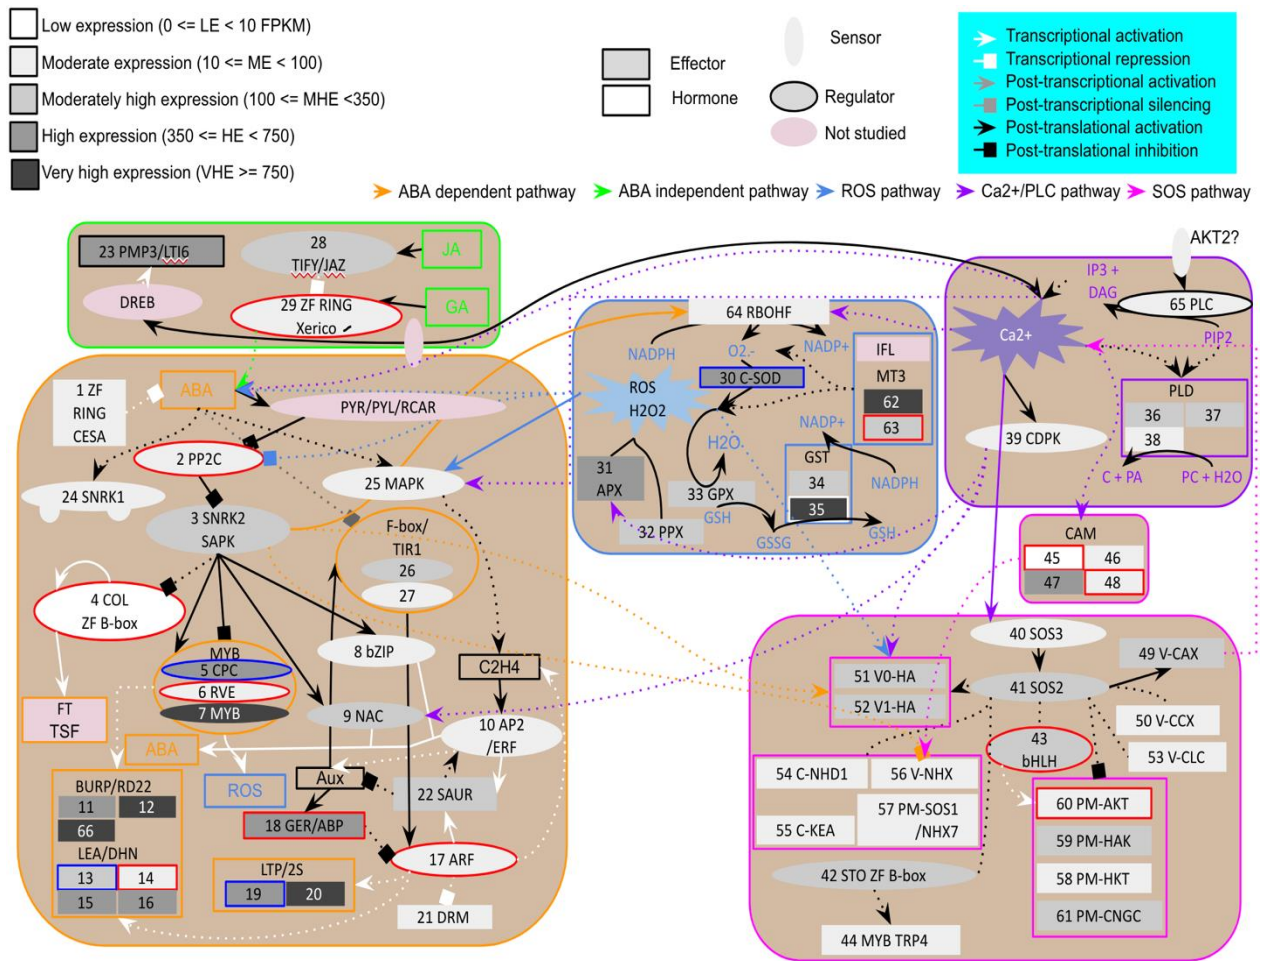

Figure S9a: 1<sup>st</sup> animated fig: RNA-Seq expression at 4 h in coconut leaf signaling pathways during salt-water stress

Salt stress induces both osmotic and ionic stress signalling transduced via five main pathways in rice<sup>4</sup>, coloured as follow:

1. Abscisic acid dependent pathway (ABA golden yellow),
2. ABA-independent pathway (ABAi in green, e.g. jasmonic acid),
3. Reactive oxygen species pathway (ROS in blue)
4. Cytosolic Ca<sup>2+</sup> dication spikes induced by the phospholipase pathway (Ca<sup>2+</sup>/PLC in purple) and
5. Calmodulin and salt overly sensitive pathways (CAM/SOS in magenta).

We assigned the same expression class numbers (ECN) to coconut paralogous genes showing similar expression profiles (cf supplementary data 3). The shade of the box surrounding the ECN and gene code represents the absolute expression level while the border represents its variation. A red or blue border denotes down or up-regulation respectively (relative to T0) while a black or white border denotes constitutively high expression.

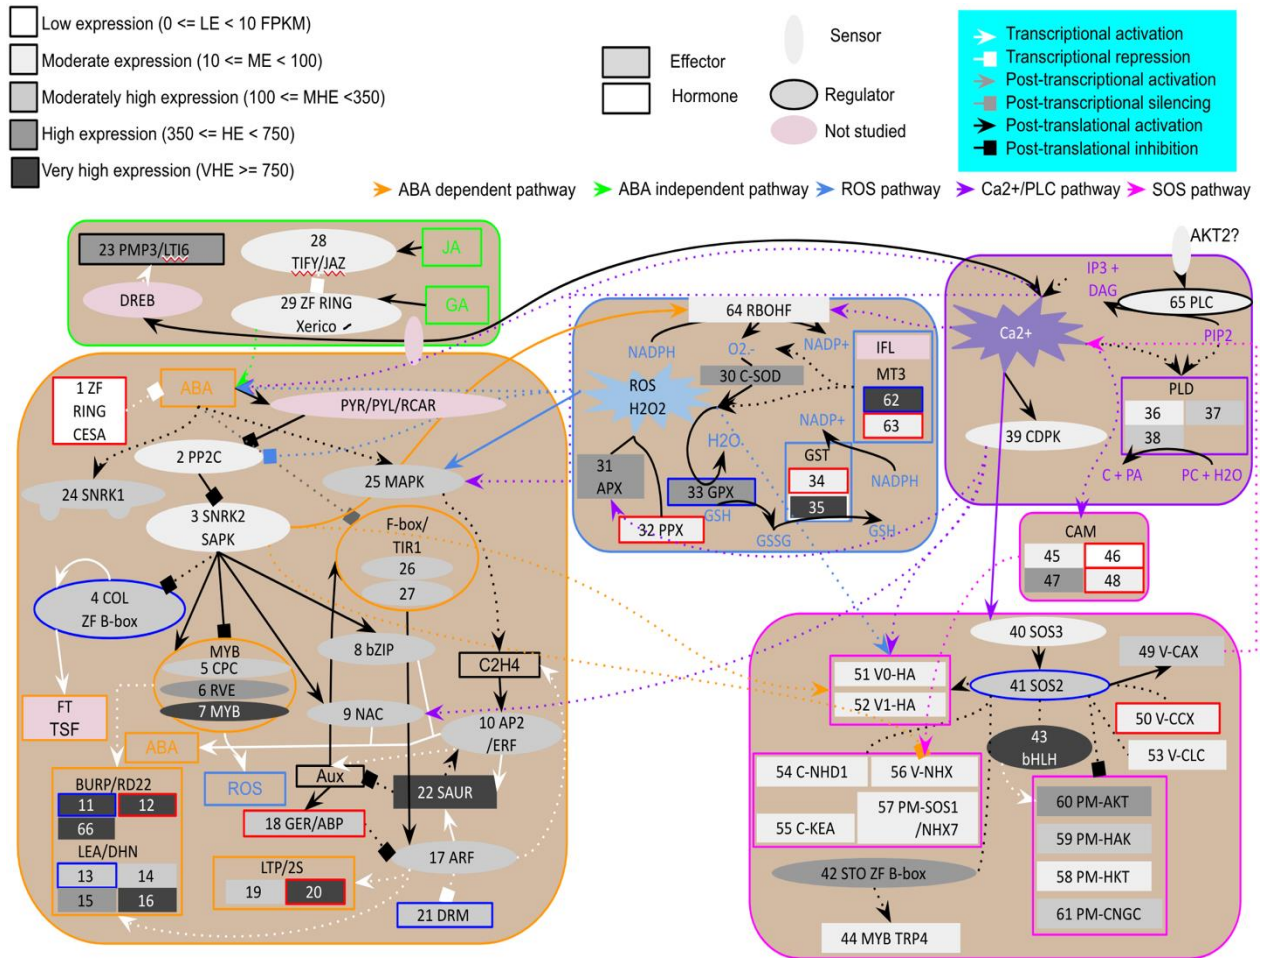

Figure S9b: 2<sup>nd</sup> animated fig: RNA-Seq expression at 6 d in coconut leaf signaling pathways during salt-water stress

Graphical conventions are the same as in figure S9a. In contrast with the early response, where 12 proteins were under-expressed and four over-expressed, this trend is gradually reversed during the late response: 10 proteins are ten under-expressed ECNs against six over-expressed when the time point 6d is compared to the time point 0.

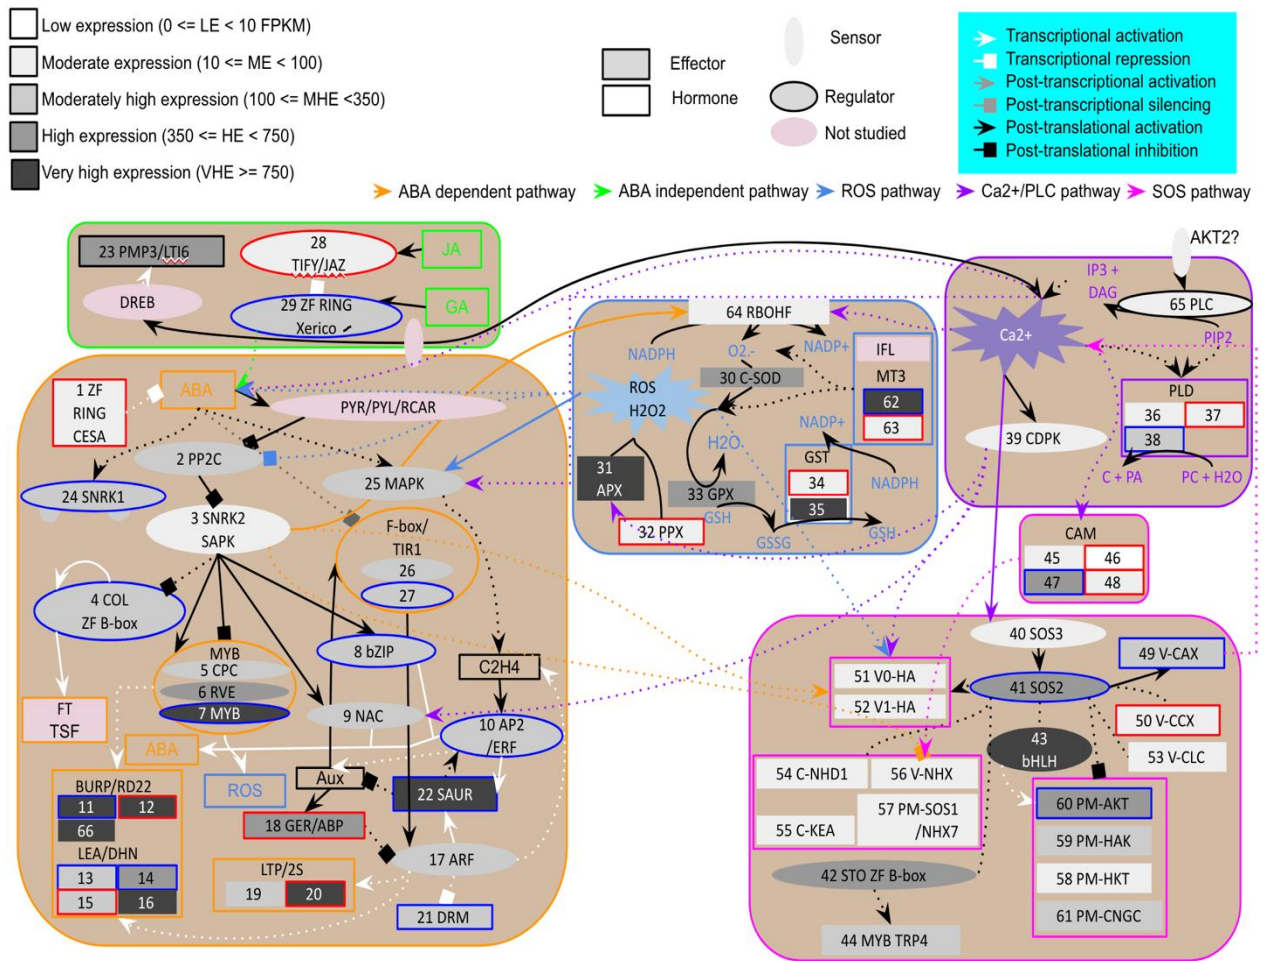

Figure S9c: 3<sup>rd</sup> animated fig: RNA-Seq expression at 10 d in coconut leaf signaling pathways during salt-water stress

Graphical conventions are the same as in figure S9a. In contrast with the early response, where 12 proteins were under-expressed and four over-expressed, this trend is reversed at 10d: 13 proteins are under-expressed ECNs against 18 over-expressed.

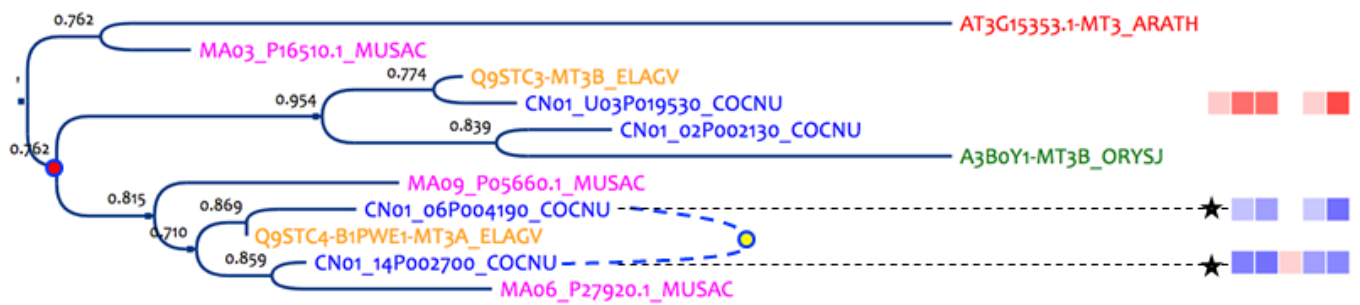

Figure S10: MT3 gene family (ROS signalling pathway)

Comparative omics of Metallothionein-like protein 3 (MT3) genes including sequences from coconut (COCNU), oil palm (ELAGA), banana (MUSAC), *japonica* rice (ORYSJ) and Arabidopsis (ARATH). No homologs were found in date palm. Colored bullets indicate WGDs (yellow for  $p$  WGD and red for  $\tau$  WGD). Note that the topology of this dendrogram does not necessarily the true phylogeny of the genes because it was computed based on a short multiple protein alignment: only 28 out of a total of 53 aminoacids are polymorphic. We use dashed lines to represent probable paralogy relationship as inferred based on synteny groups (see figures 4 and 5, in the present case, chromosomes 6 and 14 of coconut represent block A, duplicated at WGD  $p$ ) To the right, of the figure, expression differential is displayed with blue and red squares for up and down-regulation respectively. The first three columns are for the Tall variety (0 vs 4h, 0 vs 6d and 0 vs 10d) and the last three are for the Dwarf variety. Candidate genes, [CN01\\_14G002700](#) and [CN01\\_06G004190](#), are constitutively highly expressed in the leaves of this coconut individual under this salinity stress experimentation.





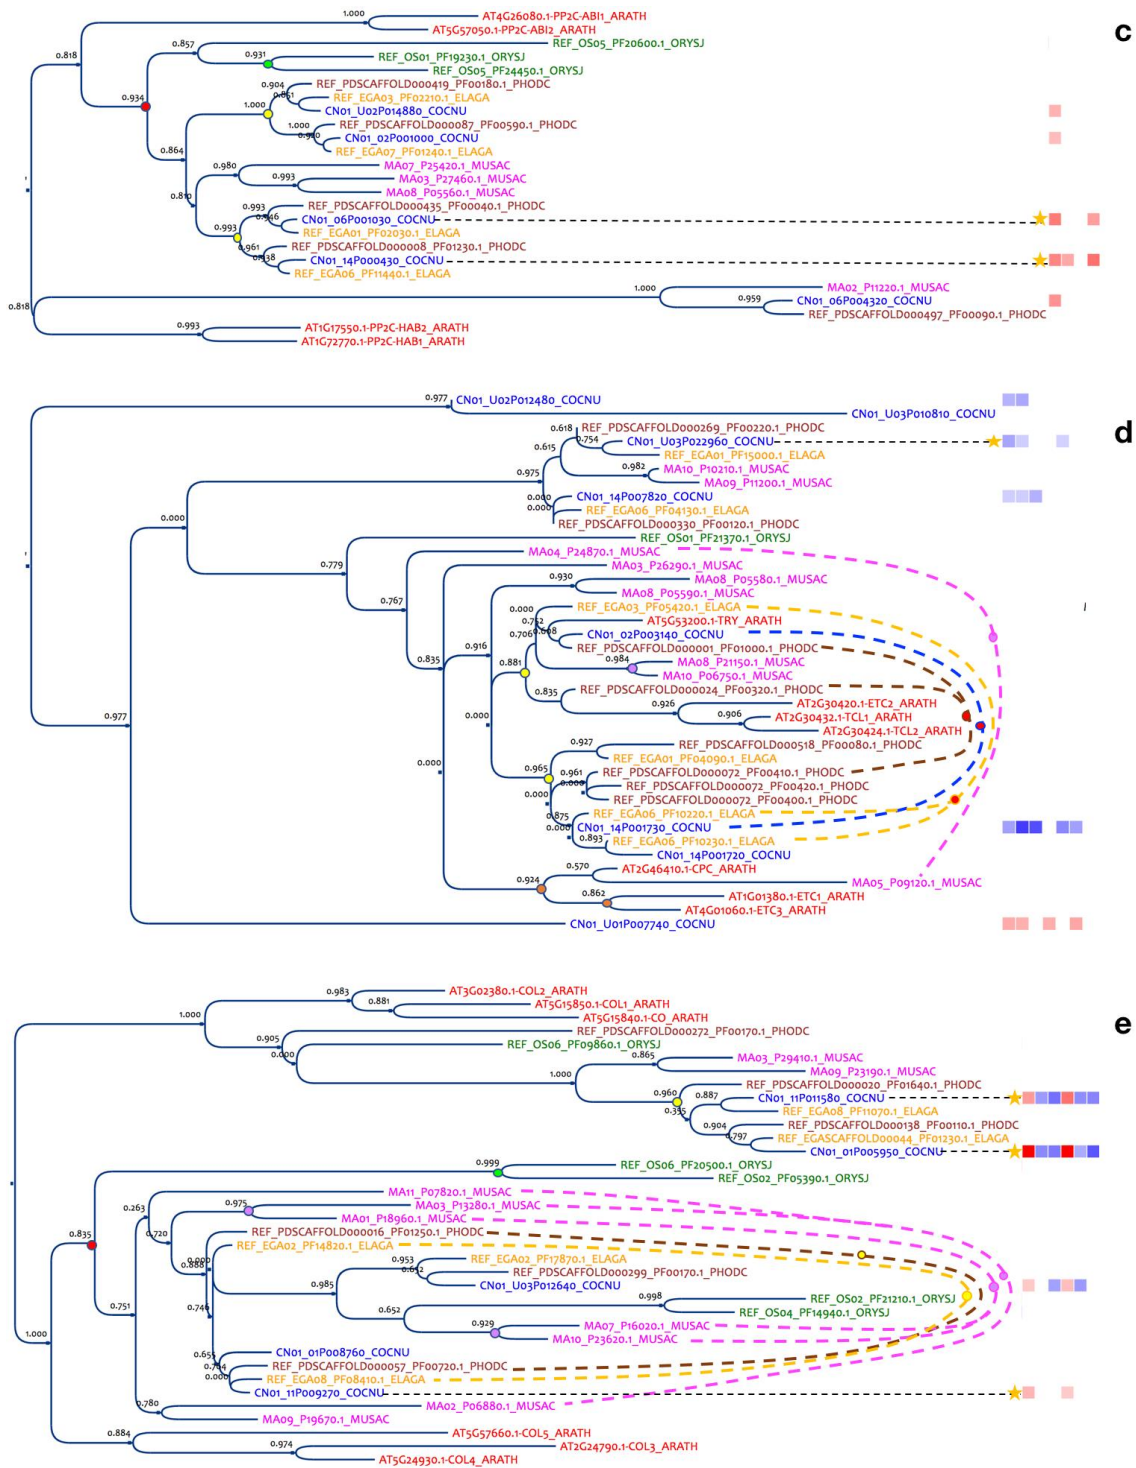

Figure S11: Expression of the ABA-ABAI pathway in coconut leaves under salt stress

a) Levels of normalized transcriptional expression in Hainan Tall leaves at time points 0, 4h, 6d and 10d after a salt stress for the DE and CHE genes of the ABA and ABAi pathways. Each gene is identified by its expression class number (ECN), gene identifier and function identifier. We assigned the same ECN to genes with similar putative functions and expression profiles.

b) Schematic representation of the ABA and ABAi signaling pathway at 4h (see legend of Figure S9).

c), d), e) Integrated comparative omics on phylogenetic trees for the PP2C, MYB and COL gene families. Colored bullet are used to represent whole genome di- or triploidisations events in monocots predicted by IDEVEN (<https://github.com/Delphine-L/IDEVEN>): yellow for WGDs  $\rho$ , red for  $\tau$ , purple for  $\alpha/\beta/\gamma$ , green for  $\rho/\sigma$ . Orange is used for whole genome di- or triploidisations events in dicots.(see [https://genomeevolution.org/wiki/index.php/Plant\\_paleopolyploidy](https://genomeevolution.org/wiki/index.php/Plant_paleopolyploidy)). Dashed lines represent probable paralogy relationships as inferred based on synteny blocks (e.g. in figure S11d, two coconut genes located on chromosomes 2 and 14 belong respectively to blocks E and A, which diverged after WGD  $\tau$  - see figure 5). Expression differential is displayed with blue and red squares for up and down-regulation respectively; the first three columns are for the Hainan Tall variety (0 vs 4h, 0 vs 6d and 0 vs 10d) and the three lasts are for the Aromatic Dwarf variety.

c) case of the PP2C group A family (ECN 2). [CN01\\_06P001030](#) and [CN01\\_14P000430](#) are the most down-regulated Protein phosphatase 2C genes (from a moderately high to a moderate expression) in our salt stress experiment. According to the Singh *et al.*'s<sup>14</sup> classification and this phylogeny, the five coconut genes could belong to the sub-clade 'a' of group A PP2Cs (ABI, HAB). This family seems well conserved over its evolutionary history: in palms, we note four sets of orthologous genes, which are likely to result from WGDs  $\rho$  and  $\tau$ .

d) Case of the CPC MYB transcription factor gene family, (ECN 5, 6 and 7). [CN01\\_14P007820](#) and [CN01\\_U03P022960](#) are the most expressed Caprice genes (VH and H). [CN01\\_14P001720](#) and [CN01\\_14P001730](#) could be two tandem duplicated genes. All species in this tree, except for rice, show tandem duplications. Theses duplications appear to have occurred at the specific level in most cases, but in the case of coconut and oil palm, it seems to have occurred in their common ancestor (out-paralogs).

e) Case of the CO-COL transcription factor gene family (ECN 4). [CN01\\_01P005950](#), [CN01\\_11P009270](#), [CN01\\_11P011580](#) and [CN01\\_U03P012640](#) are similar to Zinc finger protein CONSTANS (CO) and CONSTANS-LIKE (COL). The first three genes are differentially expressed whereas [CN01\\_U03P012640](#) is constitutively highly expressed. The typical expression profile is down-regulated at early stage and up-regulated at the late stages. In the two clades of this phylogenetic tree, gene retention after WGDs is observed. The paralogous coconut genes, [CN01\\_01P005950](#) and [CN01\\_11P011580](#) (apparently resulting from WGD  $\rho$ ) are co-orthologs of *A. thaliana* of the subfamily CO, COL1, COL2 of this CONSTANS family; while [CN01\\_01P008760](#), [CN01\\_11P009270](#) and [CN01\\_U03P012640](#) are co-orthologs of COL3, COL4 and COL5.

#### 4. GBS processing pipeline

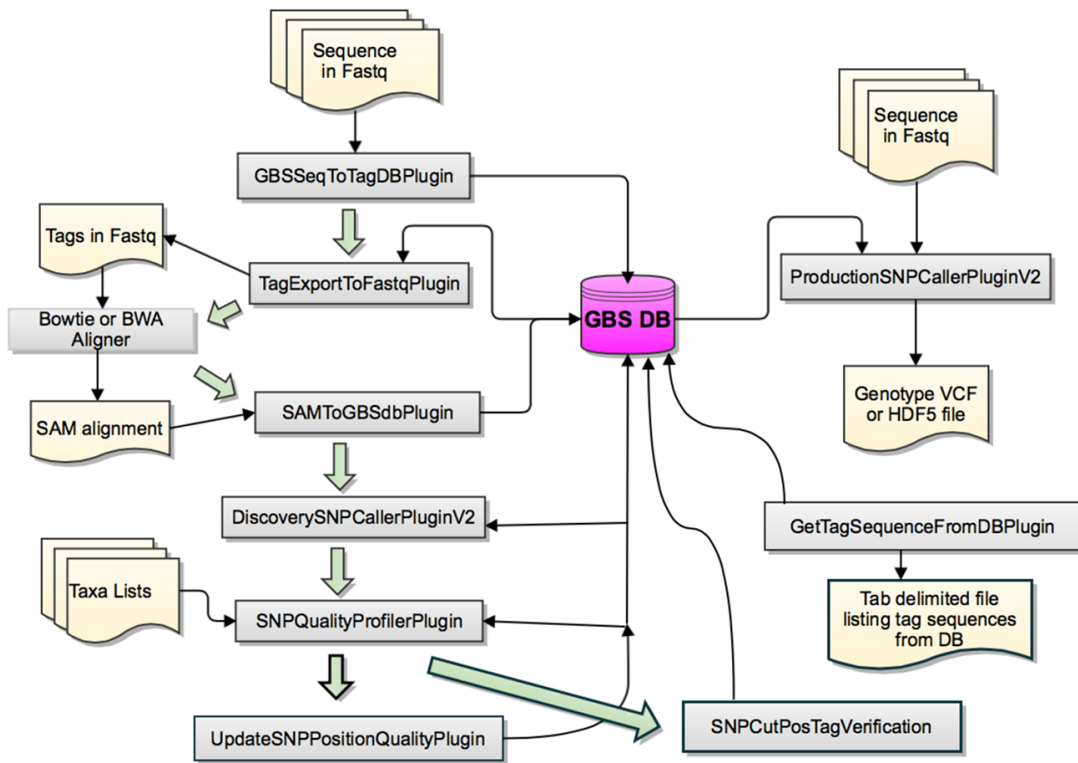

Figure S12: Tassel 5 GBS v2 Pipeline

See <https://bitbucket.org/tasseladmin/tassel-5-source/wiki/Tassel5GBSv2Pipeline>

*Table S1: Parameters used with TASSEL*

| Step (plugin)          | Parameters                                 | Results                   | Count         | %     |
|------------------------|--------------------------------------------|---------------------------|---------------|-------|
| 00_raw_fq (input)      |                                            | Read tot nb in lanes      | 1,629,747,212 |       |
| 01_GBSSeqToTagDB       | ePstI-MseI c5 kmerL81<br>minKmerL20 mnQS10 | Good barcoded read tot nb | 1,132,610,158 |       |
| 02_TagExportToFastq    | c9                                         | Tag tot nb                | 3,336,897     |       |
| 03_BowtieToSam         | very-sensitive                             | Tags aligned =1 time      | 2,224,679     | 66.67 |
| 03_BowtieToSam         | very-sensitive                             | Tags aligned >1 times     | 520,656       | 15.6  |
| 04_SAMToGBSdb          | aProp0 aLen0                               | Mapped tag tot nb         | 2,745,335     | 82.27 |
| 05_DiscoverySNPCaller  | maxTagsCutSite81                           | SNP tot nb                | 1,792,810     |       |
| 05_DiscoverySNPCaller  | mnLCov0.1 mnMAF0.01                        | Allele tot nb             | 3,746,887     |       |
| 06_SNPQualityProfiler  |                                            |                           | 1,792,810     |       |
| 07_ProdSNPCaller (VCF) | ePstI-MseI kmerL81<br>mnQS10               |                           | 3,746,887     |       |

*Table S2: Parameters used with Process reseq*

| Step                                   | Parameters                        | Result                 |
|----------------------------------------|-----------------------------------|------------------------|
| 1: demultiplex                         | met4c rePstI                      | GBS1-6                 |
| 2: cutadapt                            | aTruSeq_adapter_RC.fasta m20      | GBS1-6                 |
| 3: filter_fq_mean_qual                 | a33 m30 l35                       | GBS1-6                 |
| 4a: process_reseq BWA mapping per ind. | 242 ind_GBS_clean.fastq           | BAM file nb            |
|                                        | 368 missing_long_scaffold.fna t50 |                        |
| 4c: PR realign per ind.                | t274                              | Realigned BAM file nb  |
| 4e: PR SNP calling                     | t4                                | GVCF file nb           |
| 4f: PR VCF creation                    | t4                                | Marker nb              |
| 5: VCFprefilter                        | m5 M1000 f0.01 c2                 | Marker nb              |
| 6: VCFfilter                           | m5 M1000 f0.01:0.1 c1 s0.8 p1e-20 | Scaffold nb, Marker nb |

*Table S3: Parameters used with VCF filter*

| Step                 | Parameters                             | Results                | Count     |
|----------------------|----------------------------------------|------------------------|-----------|
| 08_MonomorphicFilter | Alt allele "."                         | Monomorphic SNP tot nb | 1,161,527 |
| 08_MonomorphicFilter | Ref allele "N"                         | Gap tot nb             | 16,091    |
| 08_MonomorphicFilter |                                        | SNP tot nb after MF    | 631,283   |
| 09_VCFFilter         | WinFreq0.01:0.1<br>miss0.5 pValue1e-20 | SNP tot nb after VCF   | 17,548    |

*Table S4: Parameters used with Tassel\_to\_J and Joinmap*

| Step                                                       | Parameters                                                                 |
|------------------------------------------------------------|----------------------------------------------------------------------------|
| 01_R Creation of Genotypic & marker info files             | PvalueMin 1e-20                                                            |
| 02_R Filtering makers according to their parents           | missInd 0.5<br>MAF 0.15<br>fewGoodAllele 0.7<br>manyWrongAllele 0.1        |
| 03_R Filtering makers according to disjunctions            | genotypeCode ABHU                                                          |
| 04_R Filtering makers according to missing data per marker | tOutlier 60<br>lGap 0.05<br>majority 0.8<br>stopRemove 20<br>maxMissLoc0.2 |
| 05_R write the final SNP matrix file for JoinMap           | rmNbInd 0                                                                  |
| Parameters for Joinmap                                     | Pop.type:bc1                                                               |
|                                                            | Nrofloci: 8466                                                             |
|                                                            | Nrofind: 2317                                                              |

*Table S5: Parameters used with Scaffhunter*

| Step                                                              | Parameters | Result                                     | Outcome                        |
|-------------------------------------------------------------------|------------|--------------------------------------------|--------------------------------|
| 1a: Scaffhunter<br>JMpwd2matrix.py                                | rec lod    | 2 distance matrix files per chr            | 16 LOD.mat                     |
|                                                                   |            |                                            | 16 REC.mat                     |
|                                                                   |            | Marker nb                                  | 8465                           |
|                                                                   |            | Scaffold nb                                | 2316                           |
| 1c: SH Ordering of scaffolds using an UPGMA like method           | Type IDENT | 1 scaffold order file per chr              | 16 LOD_scaff_order.tab         |
|                                                                   |            | 1 marker order along scaffold file per chr | 16 LOD_mark_order.tab          |
| 1d: SH reorderient Optimization of scaffold order and orientation | Type IDENT | 1 reoriented scaffold order file per chr   | 16 LOD_scaff_order_opt.tab     |
|                                                                   |            | 1 marker order along scaffold file per chr | 16 LOD_mark_order_opt.tab      |
| 1e: SH matrix2ortho                                               | Type LOD   | 1 dotplot file per chr before optimization | 16 LOD_mark_linkage_before.png |
| Markers linkage visualization by dotplot                          |            | 1 dotplot file per chr after optimization  | 16 LOD_mark_linkage_after.png  |
| 1f: SH scaff2chrom                                                |            | Marker nb                                  | 8402                           |
|                                                                   |            | Scaffold nb                                | 2303                           |
|                                                                   |            | Agp file<br>Pseudomolecule fasta file      | 16 chromosomes<br>chrUn_random |

## 5. RNA-Seq analysis bioinformatics pipeline

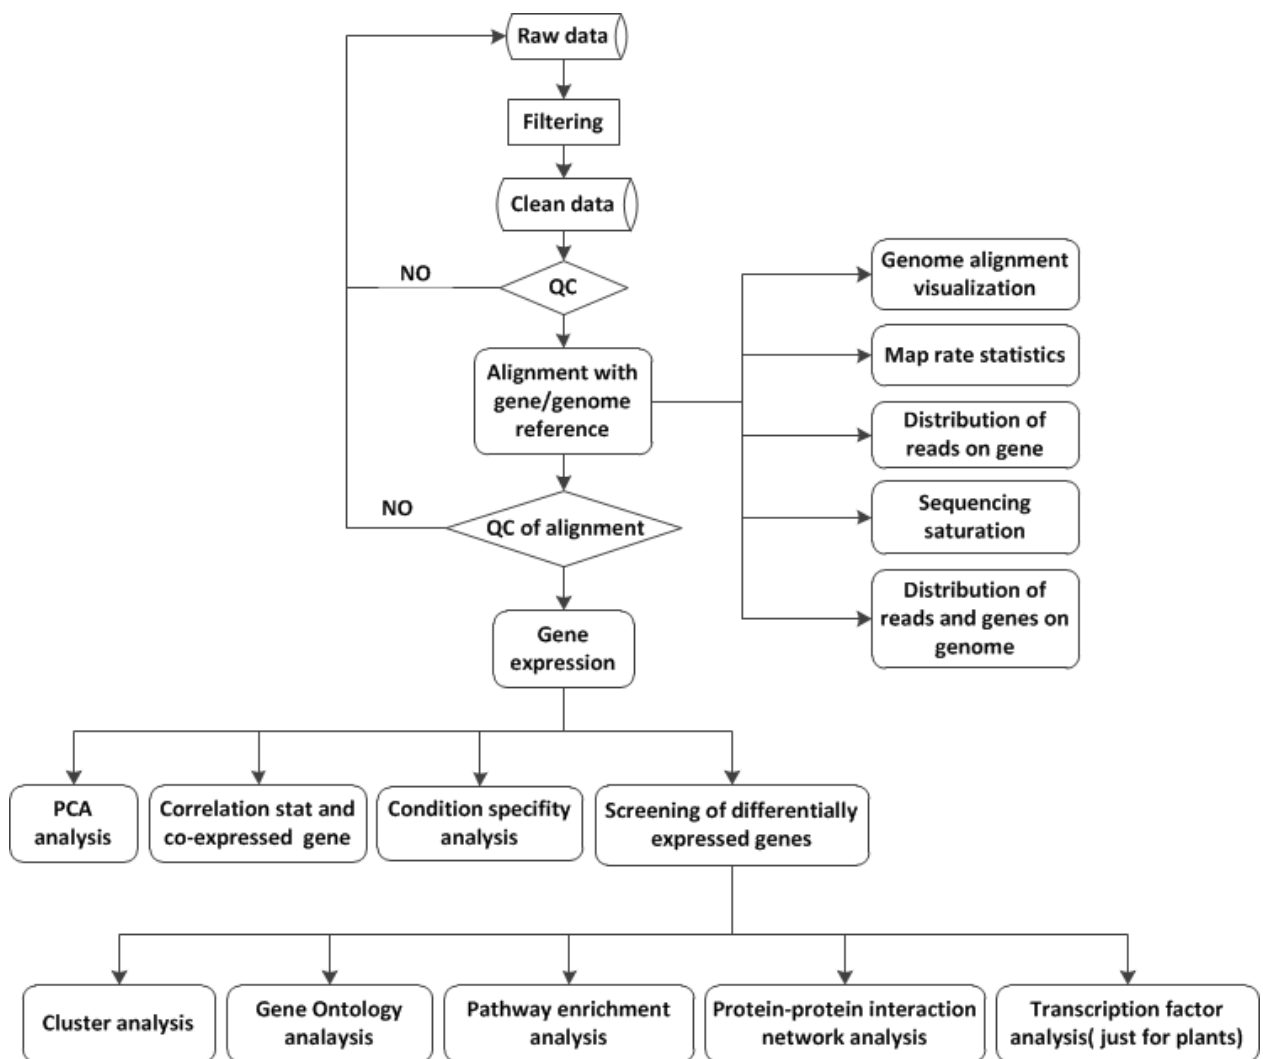

*Figure S13: RNA-Seq analysis bioinformatics workflow*

Primary sequencing data that produced by Illumina HiSeq™ 4000, called as raw reads, is subjected to quality control (QC) that determine if a resequencing step is needed. After QC, raw reads are filtered into clean reads which will be aligned to the reference sequences (BWA for genome reference and Bowtie for gene reference). QC of alignment is performed to determine if resequencing is needed. The alignment data is utilized to calculate distribution of reads on reference genes and mapping ratio. If alignment result passes QC, we will proceed with downstream analysis including gene expression and deep analysis based on gene expression (PCA/correlation/screening differentially expressed genes with RSEM software package and so on). Further, we also can perform deep analysis based on DEGs, including Gene Ontology (GO) enrichment analysis, Pathway enrichment analysis, cluster analysis, protein-protein interaction network analysis and finding transcription factor.

## 6. REFERENCES

1. Soda, N., Sharan, A., Gupta, B.K., Singla-Pareek, S.L. & Pareek, A. Evidence for nuclear interaction of a cytoskeleton protein (OsIFL) with metallothionein and its role in salinity stress tolerance. *Sci Rep* **6**, 34762 (2016).
2. Taji, T. et al. Comparative genomics in salt tolerance between *Arabidopsis* and Arabidopsis-related halophyte salt cress using *Arabidopsis* microarray. *Plant Physiol* **135**, 1697-709 (2004).
3. Rozema, J. & Schat, H. Salt tolerance of halophytes, research questions reviewed in the perspective of saline agriculture. *Environmental and Experimental Botany* **92**, 83-95 (2013).
4. Kumar, K., Kumar, M., Kim, S.R., Ryu, H. & Cho, Y.G. Insights into genomics of salt stress response in rice. *Rice (N Y)* **6**, 27 (2013).
5. Gollack, D., Li, C., Mohan, H. & Probst, N. Tolerance to drought and salt stress in plants: Unraveling the signaling networks. *Front Plant Sci* **5**, 151 (2014).
6. Julkowska, M.M. & Testerink, C. Tuning plant signaling and growth to survive salt. *Trends Plant Sci* **20**, 586-94 (2015).
7. Tao, J.J. et al. The Role of Ethylene in Plants Under Salinity Stress. *Front Plant Sci* **6**, 1059 (2015).
8. Sah, S.K., Reddy, K.R. & Li, J. Abscisic Acid and Abiotic Stress Tolerance in Crop Plants. *Front Plant Sci* **7**, 571 (2016).
9. Hua, D. et al. A plasma membrane receptor kinase, GHR1, mediates abscisic acid- and hydrogen peroxide-regulated stomatal movement in *Arabidopsis*. *Plant Cell* **24**, 2546-61 (2012).
10. Bose, J., Rodrigo-Moreno, A. & Shabala, S. ROS homeostasis in halophytes in the context of salinity stress tolerance. *J Exp Bot* **65**, 1241-57 (2014).
11. Maathuis, F.J. Sodium in plants: perception, signalling, and regulation of sodium fluxes. *J Exp Bot* **65**, 849-58 (2014).
12. Zhang, Z., Rosenhouse-Dantsker, A., Tang, Q.Y., Noskov, S. & Logothetis, D.E. The RCK2 domain uses a coordination site present in Kir channels to confer sodium sensitivity to Slo2.2 channels. *J Neurosci* **30**, 7554-62 (2010).
13. Cuellar, T. et al. Potassium transport in developing fleshy fruits: the grapevine inward K(+) channel VvK1.2 is activated by CIPK-CBL complexes and induced in ripening berry flesh cells. *Plant J* **73**, 1006-18 (2013).
14. Singh, A., Jha, S.K., Bagri, J. & Pandey, G.K. ABA inducible rice protein phosphatase 2C confers ABA insensitivity and abiotic stress tolerance in *Arabidopsis*. *PLoS One* **10**, e0125168 (2015).
