# Supplementary material for: Coconut genome assembly enables evolutionary analysis of palms and highlights signaling pathways involved in salt tolerance
Source: PubMed Central journal article supplement (PMC7822834; doi:10.1038/s42003-020-01593-x), 2021-01-22
Supplement: 42003_2020_1593_MOESM3_ESM.pdf [file 42003_2020_1593_MOESM3_ESM.pdf]

## Description of Additional Supplementary Files

### File name: Supplementary Data 1

**Description:** 2666 paralogous coconut gene models.

| Column #              | Title      | Comment                                          |
|-----------------------|------------|--------------------------------------------------|
| 1                     | IdGs       | Identity of the paralogous group (synteny block) |
| information on gene 1 |            |                                                  |
| 2                     | Gen        | Gene identifier                                  |
| 3                     | Chromosome | Chromosome number                                |
| 4                     | PosI       | Starting point of gene                           |
| 5                     | PosF       | Ending point of gene                             |
| information on gene 2 |            |                                                  |
| 6                     | Gen        | Gene identifier                                  |
| 7                     | Chromosome | Chromosome number                                |
| 8                     | PosI       | Starting point of gene                           |
| 9                     | PosF       | Ending point of gene                             |

### Example

| IdGs  | Gen            | Chromosome | PosI     | PosF | Gen      | Chromosome     | PosI    | PosF            |
|-------|----------------|------------|----------|------|----------|----------------|---------|-----------------|
| Gs.1  | CN01_12G003260 | CN01_12    | 26778862 |      | 26783317 | CN01_01G000810 | CN01_01 | 1913418 1918873 |
| Gs.1  | CN01_12G003240 | CN01_12    | 26746589 |      | 26747020 | CN01_01G000830 | CN01_01 | 1938309 1939216 |
| Gs.1  | CN01_12G003210 | CN01_12    | 26655195 |      | 26675707 | CN01_01G000880 | CN01_01 | 2037000 2051243 |
| [...] |                |            |          |      |          |                |         |                 |

### File name: Supplementary Data 2

**Description:** 9866 orthologous gene pairs in coconut and oil palm.

| Column | comment                         |
|--------|---------------------------------|
| 1      | Coconut gene identifier         |
| 2      | Coconut chromosome number       |
| 3      | Starting point of coconut gene  |
| 4      | Ending point of coconut gene    |
| 5      | Oil palm identifier             |
| 6      | oil palm chromosome number      |
| 7      | Starting point of oil palm gene |
| 8      | Ending point of oil palm gene   |

### Example

|                |   |         |         |                |   |          |          |
|----------------|---|---------|---------|----------------|---|----------|----------|
| CN01_01G003840 | 1 | 9416291 | 9418351 | XP_010914194.1 | 2 | 55227519 | 55230001 |
| CN01_01G003830 | 1 | 9394065 | 9395304 | XP_010914193.1 | 2 | 55207874 | 55209272 |
| CN01_01G003820 | 1 | 9384543 | 9390831 | XP_010914191.1 | 2 | 55197200 | 55204811 |
| [...]          |   |         |         |                |   |          |          |

**File name:** Supplementary Data 3 – 8

**Description:** An Excel file which contains the following tables

Supplementary Data 3: **Gap in Cn15:** a tentative to fill in the gap resulting from the presence of a gene involved in pollen selection in the middle part of Cn15. Protein genes in these scaffolds are orthologous to genes located in the corresponding portion of chromosome 9 of *Elaeis guineensis*.

Supplementary Data 4: **RNA-seq on genome:** alignment statistics result of clean RNA-Seq reads HAIT reference genome for all *C. nucifera* leaf samples of the salt stress experiment.

Supplementary Data 5: **RNAseq on genes:** alignment statistics result of clean RNA-Seq reads against HAIT reference genes for all *C. nucifera* leaf samples of the salt stress experiment.

Supplementary Data 6: **DE & CHE genes:** *Cocos nucifera* differentially expressed (590) or constitutively highly expressed genes (194) during the salt stress experiment.

Supplementary Data 7: **Salt related genes:** 152 *Cocos nucifera* genes which are ortholog to genes known to be involved in salt stress response in other plant species.

Supplementary Data 8: **Common genes:** 65 *Cocos nucifera* genes, which are common to Supplementary Data 6 and 7.
