# Supplementary material for: Coconut genome assembly enables evolutionary analysis of palms and highlights signaling pathways involved in salt tolerance
Source: Commun Biol. 2021 Jan 22;4:105. doi: 10.1038/s42003-020-01593-x (PMC7822834; doi:10.1038/s42003-020-01593-x)
Supplement: Supplementary file 6 — Supplementary Data 3-8 [file 42003_2020_1593_MOESM6_ESM.xlsx]

## Sheet: Readme
	Supp. Data 5	Supp. Data 6	Supp. Data 7	Definition	Reference
Supplementary Data 3				Gap in Cn15: a tentative to fill in the gap resulting from the presence of a gene involved in pollen selection in the middle part of Cn15. Protein genes in these scaffolds are orthologous to genes located in the corresponding portion of chromosome 9 of Elaeis guineensis.
Supplementary Data 4				Summary statistics of alignments of RNA_seq reads onto the reference genome (scaffolds)
Supplementary Data 5				Summary statistics of alignments of RNA_seq reads onto the reference genes (annotation)
Supplementary Data 6				Differentially and constitutively highly expressed genes (DE & CHE) in coconut leaves under high salt water concentration	This study
Supplementary Data 7				Coconut genes homolog to plant salt stress tolerance genes	Kumar 2013, Julkowska 2015, Golldack 2014, Tao 2015, Sah 2016
Supplementary Data 8				65 common genes of both Supplementary Data 6 and 7. The candidate genes were infered according two screening criteria: "specific expression" (Supplementary Data 6) and "Highly similar to known candidates" (Supplementary Data 7).
Abbreviations				List of abbreviations used in the present file and in the article
polypeptide_locus_tag	1	1	1	INSD:locus_tag qualifier (e.g. CN01_03P001760).	http://www.insdc.org/documents/feature-table
gene_locus_tag	1	1	1	INSD:locus_tag qualifier (e.g. CN01_03G001760).	http://www.insdc.org/documents/feature-table
signalling_pathway	1	1	1	Five metabolic pathways known to be involved in salt tolerance. 1. ABA: abscisic acid dependent pathway; 2. ABAi: ABA-independent pathway; 3. Ca2+/PLC: calcium / phosphoinositol-specific phospholipase C pathway; 4. ROS: reactive oxygen species; 5. SOS/CaM: salt overly sensitive / calmodulin pathways; PS: Photosystem is not a signalling pathway.	Kumar 2013
curated_family	1	1	1	Putative gene family assigned manually (see list of abbreviations).
automatic_gene_symbol	1	0	0	Predicted INSD:gene qualifier (e.g. ERF stands for ethylene-responsive transcription factor).	http://www.insdc.org/documents/feature-table
curated_gene_symbol	0	1	0	Putative INSD:gene assigned manually (see list of abbreviations).	http://www.insdc.org/documents/feature-table
gene_symbol	0	0	1	Putative INSD:gene.	http://www.insdc.org/documents/feature-table
expression_pattern	1	0	1	Gene expression during the salt stress experiment in coconut leaves described according nine patterns: 1. constituvely highly expressed (CHE); 2. Ea+: upregulated at an early stage (4 h); 3. Ea-: down-regulated at an early stage; 4. La+: upregulated at a late stage (6 or 10 days); 5. La-: down-regulated at a late stage; 6. Ea+La+: upregulated at both early and late stages; 7. Ea-La-: down-regulat…
expression_class_number	1	1	1	Genes grouped by putative family then by major types of expression patterns. 66 expression class numbers were assigned manually to 154 coconut genes.
CDS_length	1	1	0	Length in base pairs of the coconut coding sequence (CDS).
product	1	0	1	INSD:product qualifier (e.g. ethylene-responsive transcription factor).	http://www.insdc.org/documents/feature-table
functional_completeness	1	0	0	Completeness of the coconut polypeptide in order to know if it looks complete so functional, fragmented or multi-functional (modules)
evidence_code	1	0	0	Product inferred from sequence similarity (GO evidence code ISS). The function of the cognate polypeptide was validated from experiment (ISS_1). The function of the predicted orthologous polypeptide was validated from experiment or infered from computational analyses (ISS_2). The function of the similar polypeptide was infered from computational analyses (ISS_3). The function of the similar polyp…	http://www.geneontology.org/page/guide-go-evidence-codes
interpro	1	0	0	Protein classification identifier (e.g. IPR000167 is the Dehydrin InterPro entry of family type)	https://www.ebi.ac.uk/interpro/entry/IPR000167
rice_product	1	0	1	Product of the best BLASTP hit (BH) in rice.
rice_gene_locus_tag	1	0	0	Locus_tag of the BH in rice.
identity	1	0	0	Sequence identity between the coconut polypeptide and its BH in rice.
coconut_coverage	1	0	0	Ratio between the match length and coconut polypeptide length.
rice_coverage	1	0	0	Ratio between the match length and rice polypeptide length.
comment	1	1	1	Curator comment.
expression_level	1	0	0	Low expression (LE, FPKM < 10), moderate expression (ME, 10 <= FPKM < 100), moderately high expression (MHE, 100 <= FPKM < 350), high expression (HE, 350 <= FPKM < 750) and very high expression (VHE, FPKM >= 750)	http://bioinfo-web.mpl.ird.fr/cgi-bin2/microarray/public/get_RPKM.pl?project=Marianna%20(Bertrand%20et%20al%202015)&name=Cc08_g04790
mean-Cn_BD_0	1	1	1	FPKM mean between the tree replicates (1A, 2A, 3A) at 0 time (control): Cn_BD_0_1A, Cn_BD_0_2A, Cn_BD_0_3A.	BGI RNA-Seq (Quantification) Analysis Report	means-Cn_BD 3-color scale
mean-Cn_BD_4h	1	1	1	FPKM mean between the tree replicates at 4 hours: Cn_BD_4h_1A, Cn_BD_4h_2A, Cn_BD_4h_3A.	BGI RNA-Seq (Quantification) Analysis Report	0	350	750
mean-Cn_BD_6d	1	1	1	FPKM mean between the tree replicates at 6 days: Cn_BD_6d_1A, Cn_BD_6d_2A, Cn_BD_6d_3A.	BGI RNA-Seq (Quantification) Analysis Report
mean-Cn_BD_10d	1	1	1	FPKM mean between the two replicates at 10 d: Cn_BD_0_1A, Cn_BD_0_2A.	BGI RNA-Seq (Quantification) Analysis Report
log2-ratio(Cn_BD_4h/Cn_BD_0)	1	1	1	Log2(folds of mean expression in two groups) based on Noiseq package method.	Tarazona 2011	log2FC or Log2-ratio
log2-ratio(Cn_BD_6d/Cn_BD_0)	1	1	1	Log2(folds of mean expression in two groups) based on Noiseq package method.	Tarazona 2011	-2.5	0	2.5
log2-ratio(Cn_BD_10d/Cn_BD_0)	1	1	1	Log2(folds of mean expression in two groups) based on Noiseq package method.	Tarazona 2011
probability-Cn_BD_0-vs-Cn_BD_4h	1	1	0	Probability of difference / ratio based on Noiseq package method.	Tarazona 2011	probability-Cn_BD	For DE genes >=	CHE <=
probability-Cn_BD_0-vs-Cn_BD_6d	1	1	0	Probability of difference / ratio based on Noiseq package method.	Tarazona 2011		0.8	0.6
probability-Cn_BD_0-vs-Cn_BD_10d	1	1	0	Probability of difference / ratio based on Noiseq package method.	Tarazona 2011
KEGG_ortholog	1	1	0	Kyoto Encyclopedia of Genes and Genomes (KEGG) best ortholog to link coconut genome to pathways by ortholog annotation	https://www.kegg.jp/blastkoala/
blast_nr	1	1	0	Best BLASTP hit to NCBI non-redundant (nr) protein database.	https://www.ncbi.nlm.nih.gov/protein
GO_cellular_component	1	1	0	A location, relative to cellular compartments and structures, occupied by a macromolecular machine when it carries out a molecular function (GO:0005575).	http://www.informatics.jax.org/vocab/gene_ontology/GO:0005575
GO_molecular_function	1	1	0	A molecular process that can be carried out by the action / function of a single macromolecular machine, usually via direct physical interactions with other molecular entities (GO:0003674).	http://www.informatics.jax.org/vocab/gene_ontology/GO:0003674
GO_biological_process	1	1	0	A biological process represents a specific objective that the organism is genetically programmed to achieve (GO:0008150).	http://www.informatics.jax.org/vocab/gene_ontology/GO:0008150
Alt_locus_tag 1	1	1	1	Locus tag according to Xiao et al 2017
Alt_locus_tag 2	1	1	1	Locus tag used in figures 6 and S7 to S9
regulation	0	1	0	Known regulation type for the polypeptide assigned manually. For instance MYB transcription factor is activated or inhibited (AI) to regulate the expression of the DHN genes. These last ones are expected to be differentially expressed (DE) through the ABA signalling pathway under abiotic stress.
PMID	0	1	0	PubMed identifier of the articles used for the manual inference of the regulation relationships.	https://www.ncbi.nlm.nih.gov/pmc/pmctopmid
detailed_PMID	0	1	0	Details of manual inference of regulation relationships in the signalling pathway structured with "~" and "_" separators in the following way:
Principle				Gene-symbol-of-protein-player_describe-the-relationship-type_Gene-symbol-of-protein-target~Pubmed identifier~Key sentence describing the relationship
Example				JAZ_is-an-indirect-transcriptional-repressor-of_XERICO~PMID:24795738~linking function of DELLA proteins at the interface of ABA-mediated abiotic stress responses and GA-controlled developmental signaling

## Sheet: Supplementary Data 3
This is a tentative to fill the gap resulting from the presence of a gene involved in pollen selection in the middle part of Cn15. Protein genes in these scaffolds are orthologous to genes located in the corresponding portion of chromosome 9 of Elaeis guineensis.
Scaffold	Number of protein genes	Length
scaffold12218	1	120194
scaffold2938	8	592504
scaffold3116	11	944391
scaffold11903	5	196180
scaffold154	38	2611593
scaffold3417	9	457097
scaffold8808	7	587151
scaffold7880	8	362513
scaffold12795	7	316732
scaffold6534	16	384050
scaffold13439	9	333631
scaffold4063	9	475832
scaffold7514	12	176513
scaffold2973	16	333701
scaffold732	14	357253
scaffold9298	15	239990
scaffold11279	3	229562
scaffold1336	21	200590
Total	209	8919477

## Sheet: Supplementary Data 4
Sample	Total Reads	Total BasePairs	Total Mapped Reads	Perfect Match	Mismatch	Unique Match	Multiposition Match	Total Unmapped Reads
Cn_BD_0_1A	12126880	594217120	10486401	8927649	1558752	9776712	709689	1640479
	1	1	0.8647	0.7362	0.1285	0.8062	0.0585	0.1353
Cn_BD_0_2A	12163878	596030022	10597820	9269878	1327942	9878642	719178	1566058
	1	1	0.8713	0.7621	0.1092	0.8121	0.0591	0.1287
Cn_BD_0_3A	12127293	594237357	10480705	8978208	1502497	9723631	757074	1646588
	1	1	0.8642	0.7403	0.1239	0.8018	0.0624	0.1358
Cn_BD_10d_1A	12162212	595948388	10532661	9221658	1311003	9823597	709064	1629551
	1	1	0.866	0.7582	0.1078	0.8077	0.0583	0.134
Cn_BD_10d_2A	12169372	596299228	10508382	9233198	1275184	9772086	736296	1660990
	1	1	0.8635	0.7587	0.1048	0.803	0.0605	(13.65%
Cn_BD_4h_1A	12117884	593776316	10425154	9014609	1410545	9696701	728453	1692730
	1	1	0.8603	0.7439	0.1164	0.8002	0.0601	0.1397
Cn_BD_4h_2A	12120675	593913075	10379690	8955047	1424643	9668832	710858	1740985
	1	1	0.8564	0.7388	0.1175	0.7977	0.0586	0.1436
Cn_BD_4h_3A	12166309	596149141	10521723	9270357	1251366	9755729	765994	1644586
	1	1	0.8648	0.762	0.1029	0.8019	0.063	0.1352
Cn_BD_6d_1A	12118789	593820661	10434441	9033622	1400819	9725890	708551	1684348
	1	1	0.861	0.7454	0.1156	0.8025	0.0585	0.139
Cn_BD_6d_2A	12112940	593534060	10406716	9035176	1371540	9715350	691366	1706224
	1	1	0.8591	0.7459	0.1132	0.8021	0.0571	0.1409
Cn_BD_6d_3A	12165164	596093036	10461412	9147862	1313550	9749555	711857	1703752
	1	1	0.8599	0.752	0.108	0.8014	0.0585	0.1401
Cn_XS_0_1A	12116551	593710999	10384533	9042453	1342080	9630530	754003	1732018
	1	1	0.8571	0.7463	0.1108	0.7948	0.0622	0.1429
Cn_XS_0_2A	12119532	593857068	10423541	9072356	1351185	9674691	748850	1695991
	1	1	0.8601	0.7486	0.1115	0.7983	0.0618	0.1399
Cn_XS_0_3A	12121330	593945170	10395623	9024175	1371448	9657106	738517	1725707
	1	1	0.8576	0.7445	0.1131	0.7967	0.0609	0.1424
Cn_XS_10d_1A	12167521	596208529	10534894	9277400	1257494	9786760	748134	1632627
	1	1	0.8658	0.7625	0.1033	0.8043	0.0615	0.1342
Cn_XS_10d_2A	12167411	596203139	10503539	9264294	1239245	9768926	734613	1663872
	1	1	0.8633	0.7614	0.1018	0.8029	0.0604	0.1367
Cn_XS_4h_1A	12159004	595791196	10477923	9228649	1249274	9669796	808127	1681081
	1	1	0.8617	0.759	0.1027	0.7953	0.0665	0.1383
Cn_XS_4h_2A	12165174	596093526	10505651	9225026	1280625	9610699	894952	1659523
	1	1	0.8636	0.7583	0.1053	0.79	0.0736	0.1364
Cn_XS_4h_3A	12123429	594048021	10375215	9065804	1309411	9606261	768954	1748214
	1	1	0.8558	0.7478	0.108	0.7924	0.0634	0.1442
Cn_XS_6d_1A	12113421	593557629	10379883	9138129	1241754	9710818	669065	1733538
	1	1	0.8569	0.7544	0.1025	0.8017	0.0552	0.1431
Cn_XS_6d_2A	12161410	595909090	10545085	9258038	1287047	9791813	753272	1616325
	1	1	0.8671	0.7613	0.1058	0.8052	0.0619	0.1329
Cn_XS_6d_3A	12166981	596182069	10522129	9308942	1213187	9818161	703968	1644852
	1	1	0.8648	0.7651	0.0997	0.807	0.0579	0.1352

## Sheet: Supplementary Data 5
Sample	Total Reads	Total BasePairs	Total Mapped Reads	Perfect Match	Mismatch	Unique Match	Multiposition Match	Total Unmapped Reads
Cn_BD_0_1A	12126880	594217120	6470397	5516850	953547	5391690	1078707	5656482
	1	1	0.5336	0.4549	0.0786	0.4446	0.089	0.4664
Cn_BD_0_2A	12163878	596030022	6077935	5354535	723400	5087060	990875	6085942
	1	1	0.4997	0.4402	0.0595	0.4182	0.0815	0.5003
Cn_BD_0_3A	12127293	594237357	6494090	5562583	931507	5389533	1104557	5633202
	1	1	0.5355	0.4587	0.0768	0.4444	0.0911	0.4645
Cn_BD_10d_1A	12162212	595948388	6363003	5614338	748665	5340695	1022308	5799208
	1	1	0.5232	0.4616	0.0616	0.4391	0.0841	0.4768
Cn_BD_10d_2A	12169372	596299228	6154918	5452762	702156	5153130	1001788	6014453
	1	1	0.5058	0.4481	0.0577	0.4235	0.0823	0.4942
Cn_BD_4h_1A	12117884	593776316	6586588	5718637	867951	5520898	1065690	5531295
	1	1	0.5435	0.4719	0.0716	0.4556	0.0879	0.4565
Cn_BD_4h_2A	12120675	593913075	6732288	5840964	891324	5633107	1099181	5388386
	1	1	0.5554	0.4819	0.0735	0.4648	0.0907	0.4446
Cn_BD_4h_3A	12166309	596149141	5932357	5262161	670196	4984298	948059	6233951
	1	1	0.4876	0.4325	0.0551	0.4097	0.0779	0.5124
Cn_BD_6d_1A	12118789	593820661	6803325	5920288	883037	5694580	1108745	5315463
	1	1	0.5614	0.4885	0.0729	0.4699	0.0915	0.4386
Cn_BD_6d_2A	12112940	593534060	6743982	5887794	856188	5632893	1111089	5368957
	1	1	0.5568	0.4861	0.0707	0.465	0.0917	0.4432
Cn_BD_6d_3A	12165164	596093036	6285269	5540539	744730	5290280	994989	5879894
	1	1	0.5167	0.4554	0.0612	0.4349	0.0818	0.4833
Cn_XS_0_1A	12116551	593710999	6418190	5599086	819104	5312174	1106016	5698360
	1	1	0.5297	0.4621	0.0676	0.4384	0.0913	0.4703
Cn_XS_0_2A	12119532	593857068	6584039	5755799	828240	5476826	1107213	5535492
	1	1	0.5433	0.4749	0.0683	0.4519	0.0914	0.4567
Cn_XS_0_3A	12121330	593945170	6604992	5754849	850143	5490084	1114908	5516337
	1	1	0.5449	0.4748	0.0701	0.4529	0.092	0.4551
Cn_XS_10d_1A	12167521	596208529	6073997	5390639	683358	5066563	1007434	6093523
	1	1	0.4992	0.443	0.0562	0.4164	0.0828	0.5008
Cn_XS_10d_2A	12167411	596203139	6313540	5620696	692844	5292192	1021348	5853870
	1	1	0.5189	0.4619	0.0569	0.4349	0.0839	0.4811
Cn_XS_4h_1A	12159004	595791196	5963677	5271435	692242	4916827	1046850	6195326
	1	1	0.4905	0.4335	0.0569	0.4044	0.0861	0.5095
Cn_XS_4h_2A	12165174	596093526	5788589	5104487	684102	4794547	994042	6376584
	1	1	0.4758	0.4196	0.0562	0.3941	0.0817	0.5242
Cn_XS_4h_3A	12123429	594048021	6601474	5795175	806299	5466760	1134714	5521954
	1	1	0.5445	0.478	0.0665	0.4509	0.0936	0.4555
Cn_XS_6d_1A	12113421	593557629	5931581	5249742	681839	4989646	941935	6181839
	1	1	0.4897	0.4334	0.0563	0.4119	0.0778	0.5103
Cn_XS_6d_2A	12161410	595909090	6270237	5554716	715521	5251569	1018668	5891172
	1	1	0.5156	0.4567	0.0588	0.4318	0.0838	0.4844
Cn_XS_6d_3A	12166981	596182069	5996713	5334966	661747	5016900	979813	6170267
	1	1	0.4929	0.4385	0.0544	0.4123	0.0805	0.5071

## Sheet: Supplementary Data 6
polypeptide_locus_tag	gene_locus_tag	signalling_pathway	curated_family	automatic_gene_symbol	expression_class_number	expression_pattern	CDS_length	functional_completeness	evidence_code	InterPro	product	rice_product	rice_gene_locus_tag	identity	coconut_coverage	rice_coverage	mean-Cn_BD_0	mean-Cn_BD_4h	mean-Cn_BD_6d	mean-Cn_BD_10d	log2-ratio(Cn_BD_4h/Cn_BD_0)	log2-ratio(Cn_BD_6d/Cn_BD_0)	log2-ratio(Cn_BD_10d/Cn_BD_0)	probability-Cn_BD_0-vs-Cn_BD_4h	probability-Cn_BD_0-vs-Cn_BD_6d	probability-Cn_BD_0-vs-Cn_BD_10d	KEGG_ortholog	blast_nr	GO_cellular_component	GO_molecular_function	GO_biological_process	alt_locus_tag_1	alt_locus_tag_2
CN01_03P001760	CN01_03G001760	PS?	#N/A	PNSB5,APA3,APA1,TGAL8,LOC103695762,ACMD2_01041,PnsB5	#N/A	Ea+La+	681	complete	ISS_1	IPR034569	photosynthetic NDH subunit of subcomplex B 5, chloroplastic	NAD(P)H dehydrogenase 18	LOC_Os01g70400	0.76	0.7	0.69	245.17	664.453	871.153	830.405	1.43839	1.82914	1.76003	0.856647	0.875784	0.878494	-		GO:0043231//intracellular membrane-bounded organelle	-	-	COCehwD017920.2	CN01_03P001760
CN01_11P010500	CN01_11G010500	#N/A	#N/A	STR9,STR10,STR11,At4g27700,LOC103702296,ACMD2_15140,103998666	#N/A	Ea+La+	696	complete	ISS_1	IPR036873,IPR001763	rhodanese-like domain-containing protein 9, chloroplastic	Rhodanese/Cell cycle control phosphatase superfamily protein	LOC_Os09g10750	0.62	0.98	0.98	228.493	503.863	540.64	486.315	1.14088	1.24252	1.08974	0.820649	0.819827	0.804172	-		GO:0009534//chloroplast thylakoid	-	-	COCehwD001357.1	CN01_11P010500
CN01_12P008390	CN01_12G008390	#N/A	#N/A	At5g06060,TR,At2g29370,At1g07440,LOC103697337,LOC103697345,LOC103697356,ACMD2_00313	#N/A	Ea+La+	843	complete	ISS_2	IPR002347,IPR036291,IPR020904	Tropinone reductase	NAD(P)-binding Rossmann-fold superfamily protein	LOC_Os03g16210	0.62	0.94	0.97	108.19	374.26	612.22	778.615	1.79047	2.50048	2.84734	0.881782	0.899633	0.910774	K08081|1|6e-98|355|vvi:100267258|tropine dehydrogenase [EC:1.1.1.206]		-	GO:0016491//oxidoreductase activity	GO:0008152//metabolic process	COCehwD028003.1	CN01_12P008390
CN01_16P001410	CN01_16G001410	#N/A	#N/A	GLN2,GS2,CCACVL1_27426,LOC103713635,LOC103723616,LOC103723608	#N/A	Ea+La+	1389	modules	ISS_3	IPR036651,IPR008390,IPR014746	putative membrane protein PM19L	glutamine synthetase 2	LOC_Os04g56400	0.625	0.55	0.7	149.39	354.203	622.047	441.945	1.24549	2.05794	1.56478	0.834878	0.886313	0.859866	K01915|1|2e-59|157|vvi:100242605|glutamine synthetase [EC:6.3.1.2]		-	-	-	COCehwD018073.1	CN01_16P001410
CN01_14P008510	CN01_14G008510	#N/A	#N/A	LOC103718365,103975690,LOC104597692	#N/A	Ea+La+	858	complete	ISS_4	IPR029471,IPR003615	conserved hypothetical protein	HNH endonuclease	LOC_Os07g07480	0.73	0.68	0.69	52.4267	142.06	147.637	136.34	1.43813	1.49368	1.37884	0.845121	0.836339	0.830601	-		-	GO:0004518//nuclease activity;GO:0005488//binding	-	COCehwD003132.1	CN01_14P008510
CN01_06P008750	CN01_06G008750	#N/A	DHN,LEA	RAB15,DHN2,DHN3,DHN1,LOC103708145,LOC103493214,DHN-2	13	Ea+La+	426	complete	ISS_1	IPR030513,IPR000167	desiccation-related protein clone PCC6-19	DNAJ heat shock N-terminal domain-containing protein	LOC_Os01g50700	0.35	0.94	0.32	26.92	117.573	115.88	144.02	2.12681	2.10588	2.41952	0.885107	0.875977	0.893596	-		-	-	-	COCehwD015281.1	CN01_06P008750
CN01_09P007740	CN01_09G007740	#N/A	#N/A	CLH1,CLH2,CACLH,CHLASE1,LOC103705552,LOC101763039	#N/A	Ea+la+	927	complete	ISS_2	IPR029058,IPR017395	Chlorophyllase-1	chlorophyllase 2	LOC_Os10g28370	0.44	0.86	0.75	43.7433	96.1633	131.623	104.855	1.13642	1.58928	1.26126	0.800004	0.84713	0.8114	K08099|1|2e-87|320|sbi:SORBI_02g012300|chlorophyllase [EC:3.1.1.14]		-	-	-	COCehwD014286.1	CN01_09P007740
CN01_14P005240	CN01_14G005240	#N/A	#N/A	ACMD2_26281,MANES_06G074700,PRUPE_1G302400,TCM_011894	#N/A	Ea+la+	162	complete	ISS_4	#N/A	conserved hypothetical protein	#N/A	LOC_Os01g45470	0.49	0.72	0.72	28.0867	69.35	105.25	88.18	1.30401	1.90586	1.65057	0.811199	0.86325	0.849698	-		-	-	-	COCehwD021146.1	CN01_14P005240
CN01_14P003000	CN01_14G003000	#N/A	#N/A	unknown_gene	#N/A	Ea+la+	243	missing_functional_completeness	ISS_5	#N/A	hypothetical protein	Aldolase-type TIM barrel family protein	LOC_Os01g70170	0.25	0.88	0.16	17.09	59.62	111.133	55.175	1.80264	2.70107	1.69086	0.851019	0.890629	0.83665	-		-	-	-	COCehwD007033.1	CN01_14P003000
CN01_scaffold000076P000010	CN01_scaffold000076G000010	#N/A	#N/A	CYP71A9,CYP71A1,CYP71B13,CYP71B14,LOC103698407,LOC103698478,LOC103724080,LOC103724206	#N/A	Ea+la+	1497	complete	ISS_2	IPR001128,IPR017972,IPR002401,IPR036396	Cytochrome P450 71A9	cytochrome P450, family 71, subfamily B, polypeptide 36	LOC_Os03g39760	0.44	0.99	0.99	12.5933	58.5433	55.3033	296.745	2.21684	2.13471	4.55849	0.869504	0.855727	0.922309	K00517|1|4e-113|406|ath:AT3G26320|[EC:1.14.-.-]		GO:0016020//membrane	GO:0046872//metal ion binding	-	COCehwD025022.1	CN01_U02P004450
CN01_05P007590	CN01_05G007590	#N/A	#N/A	LHCA4,lhcA-P4,LHC,CAB7,LOC103702942,B456_001G074300,LOC107953509,F383_06915	#N/A	Ea+La+	756	complete	ISS_1	IPR001344,IPR022796,IPR023329	chlorophyll a-b binding protein 4, chloroplastic	light-harvesting chlorophyll-protein complex I subunit A4	LOC_Os08g33820	0.81	1	1	2778.29	6519.58	6734.3	5503.51	1.23058	1.27733	0.986153	0.836127	0.827507	0.778202	K08910|1|2e-127|452|vvi:100232934|light-harvesting complex I chlorophyll a/b binding protein 4		GO:0009526//plastid envelope;GO:0043234//protein complex;GO:0009570//chloroplast stroma;GO:0009534//chloroplast thylakoid	GO:0046906//tetrapyrrole binding	GO:0009628//response to abiotic stimulus;GO:0006091//generation of precursor metabolites and energy	COCehwD005600.1	CN01_05P007590
CN01_07P009710	CN01_07G009710	#N/A	#N/A	TIP1-1,TIP1-2,LOC103706129,LOC103715387,BAE44_0005513,103970208	#N/A	Ea+La+	630	complete	ISS_2	IPR000425,IPR022357,IPR023271,IPR034294	Aquaporin TIP1-1	gamma tonoplast intrinsic protein	LOC_Os03g05290	0.9	1	0.83	152.127	500.74	352.27	237.89	1.71879	1.21141	0.645022	0.879216	0.81278	0.653703	K09873|1|2e-90|329|ath:AT2G36830|aquaporin TIP		-	-	-	COCehwD014220.1	CN01_07P009710
CN01_04P016090	CN01_04G016090	#N/A	#N/A	LECASAL,dfa,ZOA,DB1Cys68	#N/A	Ea+	519	complete	ISS_2	IPR001480,IPR036426	Mannose-specific lectin	S-domain-2 5	LOC_Os04g23600	0.27	0.55	0.14	9.95	235.89	40.95	4.075	4.56727	2.0411	-1.2879	0.922795	0.835774	0.577201	-		-	-	-	COCehwD004464.1	CN01_04P016090
CN01_09P004940	CN01_09G004940	#N/A	#N/A	At5g55050,At5g33370,At1g71250,At3g50400,LOC103701153,LOC103701067	#N/A	Ea+La+	1083	complete	ISS_1	IPR036514,IPR035669,IPR001087	GDSL esterase/lipase At5g55050	GDSL-like Lipase/Acylhydrolase superfamily protein	LOC_Os02g44860	0.6	0.93	0.93	18.92	223.15	145.57	30.56	3.56003	2.94373	0.691732	0.913518	0.898137	0.585471	K01206|1|2e-21|101|ath:AT1G67830|alpha-L-fucosidase [EC:3.2.1.51];K00514|3|6e-18|90.1|rcu:RCOM_1428040|zeta-carotene desaturase [EC:1.3.5.6]		GO:0031410//cytoplasmic vesicle	-	-	COCehwD021790.4	CN01_09P004940
CN01_contig68780010P000010	CN01_contig68780010G000010	#N/A	#N/A	DMR6,DLO2,F3H-2,DLO1,LOC103723166,LOC103723165,LOC104608624	#N/A	Ea+La+	243	fragment	ISS_3	IPR026992,IPR027443	putative Protein DOWNY MILDEW RESISTANCE 6	2-oxoglutarate (2OG) and Fe(II)-dependent oxygenase superfamily protein	LOC_Os08g37456	0.55	0.99	0.23	66.9933	150.017	172.083	134.645	1.16303	1.36102	1.00707	0.813855	0.825894	0.770171	-		-	GO:0016706//oxidoreductase activity, acting on paired donors, with incorporation or reduction of molecular oxygen, 2-oxoglutarate as one donor, and incorporation of one atom each of oxygen into both donors;GO:0016701//oxidoreductase activity, acting on single donors with incorporation of molecular oxygen	GO:0051553	COCehwD000037.1	COCehwD000037.1
CN01_06P011990	CN01_06G011990	#N/A	#N/A	unknown_gene	#N/A	Ea+La+	360	missing_functional_completeness	ISS_5	#N/A	hypothetical protein	ARM repeat superfamily protein	LOC_Os01g56590	0.31	0.58	0.04	72.6567	167.233	158.08	175.715	1.2027	1.12149	1.27407	0.821463	0.792034	0.821579	-		GO:0043231//intracellular membrane-bounded organelle	-	-	COCehwD027656.1	CN01_06P011990
CN01_14P010340	CN01_14G010340	#N/A	#N/A	DLO2,DLO1,F3H-2,LOC103709237,LOC103709158,LOC104595859,BVC80_8985g56	#N/A	Ea+La+	912	complete	ISS_2	IPR005123,IPR027443,IPR026992	protein DMR6-LIKE OXYGENASE 2	2-oxoglutarate (2OG) and Fe(II)-dependent oxygenase superfamily protein	LOC_Os03g42130	0.65	0.99	0.86	67.44	151.01	137.517	191.195	1.16297	1.02793	1.50337	0.813986	0.76793	0.845953	K06892|1|2e-100|363|ath:AT3G19010|;K00475|4|4e-46|183|mtr:MTR_8g075890|naringenin 3-dioxygenase [EC:1.14.11.9]		-	GO:0016701//oxidoreductase activity, acting on single donors with incorporation of molecular oxygen;GO:0046914//transition metal ion binding	GO:0008152//metabolic process	COCehwD008146.1	CN01_14P010340
CN01_11P003300	CN01_11G003300	#N/A	#N/A	LIR1,Os04g0281900,OsI_15195,LOC103707811,LOC103708055,AMTR_s00016p00166750,103989339	#N/A	Ea+	429	complete	ISS_2	IPR009856	light-regulated protein, chloroplastic	CCR-like	LOC_Os01g01340	0.6	0.52	0.58	626.39	1533.11	813.357	872.31	1.29133	0.376827	0.47778	0.842921	0.478826	0.562912	-		-	-	-	COCehwD013881.1	CN01_11P003300
CN01_scaffold018793P000010	CN01_scaffold018793G000010	#N/A	#N/A	RPS18A,RPS18,RPS13,ACMD2_03409,LOC103722458	#N/A	Ea+	459	complete	ISS_1	IPR010979,IPR018269,IPR001892,IPR027437	40S ribosomal protein S18	Ribosomal protein S13/S18 family	LOC_Os03g58050	0.92	0.99	0.99	434.727	1358.45	493.887	497.99	1.64378	0.184071	0.196008	0.875112	0.289131	0.315947	K02964|1|1e-73|272|vvi:100245272|small subunit ribosomal protein S18e		GO:0031090//organelle membrane;GO:0015935//small ribosomal subunit;GO:0030312//external encapsulating structure;GO:0031981//nuclear lumen	GO:0003676//nucleic acid binding;GO:0005198//structural molecule activity	GO:0010467//gene expression	COCehwD008189.1	CN01_U03P005340
CN01_02P014000	CN01_02G014000	#N/A	#N/A	LSM6B,LSM6A,At4g30220,LSM4,LOC103697821,LOC101499288	#N/A	Ea+	273	complete	ISS_1	IPR001163,IPR016487,IPR010920	U6 snRNA-associated Sm-like protein LSm6	Small nuclear ribonucleoprotein family protein	LOC_Os02g30624	0.96	0.89	0.79	443.537	934.693	448.887	647.57	1.07544	0.0172979	0.545983	0.811944	0.0928722	0.607551	K12625|1|4e-40|160|mtr:MTR_4g080300|U6 snRNA-associated Sm-like protein LSm6		GO:0032991//macromolecular complex	GO:0005488//binding	-	COCehwD018433.1	CN01_02P014000
CN01_03P002150	CN01_03G002150	#N/A	#N/A	At2g30620,MA16_Dca014714,AXF42_Ash010269,LOC103723452,At2g30620_4	#N/A	Ea+	810	complete	ISS_2	IPR005818,IPR005819,IPR036388,IPR036390	Histone H1.2	winged-helix DNA-binding transcription factor family protein	LOC_Os05g51850	0.37	0.45	0.24	393.767	814.607	374.03	365.375	1.04876	-0.074187	-0.107963	0.803943	0.153856	0.210878	K11275|1|2e-24|111|sbi:SORBI_01g005010|histone H1/5		GO:0000785//chromatin;GO:0043231//intracellular membrane-bounded organelle	GO:0003676//nucleic acid binding	GO:0034728//nucleosome organization	COCehwD003888.1	CN01_03P002150
CN01_08P010630	CN01_08G010630	ROS	SODCZ	SODCP,SODCP.2,CSD2,LOC103698816,SOD,ACMD2_11943	30	Ea+	525	fragment	ISS_3	IPR001424,IPR018152,IPR024134,IPR036423	putative Superoxide dismutase [Cu-Zn], chloroplastic	copper/zinc superoxide dismutase 2	LOC_Os08g44770	0.69	0.9	0.7	285.32	689.277	490.323	484.375	1.2725	0.781153	0.763544	0.839362	0.702423	0.704537	K04565|1|2e-46|182|osa:4346329|Cu/Zn superoxide dismutase [EC:1.15.1.1]		-	-	-	COCehwD007669.1	CN01_08P010630
CN01_16P007840	CN01_16G007840	#N/A	#N/A	RPL36B,RPL36A,RPL36C,RPL36,LOC103721977,LOC103703461,103994017	#N/A	Ea+	303	complete	ISS_1	IPR000509,IPR038097	60S ribosomal protein L36-3	Ribosomal protein L36e family protein	LOC_Os05g38520	0.88	0.99	0.93	293.633	646.143	213.767	214.32	1.13784	-0.457979	-0.454249	0.821394	0.535432	0.539987	K02920|1|1e-41|165|vvi:100262717|large subunit ribosomal protein L36e		GO:0030529//ribonucleoprotein complex	GO:0005198//structural molecule activity	GO:0010467//gene expression	COCehwD005682.1	CN01_16P007840
CN01_01P003200	CN01_01G003200	ABA	LTP,2S	TPRP-F1,At4g12490,At4g12500,LOC103697564,103969199,LOC103704398,VITISV_040680	19	Ea+	525	complete	ISS_2	IPR016140,IPR027923,IPR036312	36.4 kDa proline-rich protein	Bifunctional inhibitor/lipid-transfer protein/seed storage 2S albumin superfamily protein	LOC_Os04g52260	0.47	0.86	0.79	188.427	614.947	212.543	157.36	1.70646	0.173754	-0.259934	0.879064	0.275707	0.37428	-		-	-	-	COCehwD023562.2	CN01_01P003200
CN01_scaffold013062P000030	CN01_scaffold013062G000030	#N/A	#N/A	ELIP1,ELIP2,LOC103697096,LOC103704509,ACMD2_19620	#N/A	Ea+	483	complete	ISS_1	IPR022796	early light-induced protein 1, chloroplastic	Chlorophyll A-B binding family protein	LOC_Os07g08150	0.74	0.69	0.56	235.72	562.56	346.527	233.51	1.25493	0.555892	-0.0135898	0.836975	0.599643	0.0697956	-		-	-	GO:0006950//response to stress;GO:0009628//response to abiotic stimulus	COCehwD004051.1	CN01_U02P005540
CN01_12P006260	CN01_12G006260	#N/A	#N/A	CHI3,CHI,LOC103708901	#N/A	Ea+	633	complete	ISS_1	IPR036298,IPR016087,IPR016088,IPR016089	Chalcone-flavonone isomerase family protein	Chalcone-flavanone isomerase family protein	LOC_Os11g02440	0.71	0.99	0.97	169.483	523.847	363.78	145.89	1.628	1.10192	-0.216262	0.872726	0.797115	0.332405	K01859|1|5e-16|82.4|pop:POPTR_724846|chalcone isomerase [EC:5.5.1.6]		-	GO:0016872//intramolecular lyase activity	GO:0009699//phenylpropanoid biosynthetic process;GO:0006575//cellular modified amino acid metabolic process	COCehwD004897.1	CN01_12P006260
CN01_12P003770	CN01_12G003770	#N/A	#N/A	RPL24,BVC80_8917g30,CCACVL1_12923	#N/A	Ea+	573	complete	ISS_1	IPR041988,IPR005824,IPR003256,IPR008991,IPR005825,IPR014722	50S ribosomal protein L24, chloroplastic	Translation protein SH3-like family protein	LOC_Os06g46930	0.66	0.96	0.99	205	506.007	300.437	260.42	1.30353	0.551437	0.345216	0.8419	0.593603	0.460607	K02895|1|3e-78|288|vvi:100250357|large subunit ribosomal protein L24		GO:0009532//plastid stroma;GO:0030529//ribonucleoprotein complex	GO:0003723//RNA binding;GO:0005198//structural molecule activity	GO:0010467//gene expression	COCehwD024601.1	CN01_12P003770
CN01_05P001950	CN01_05G001950	#N/A	#N/A	CYP75B1,CYP75B2,CYP75B4,CYP75B3,LOC103710250,F3'H1,F3'H,CFOL_v3_27507	#N/A	Ea+	1434	complete	ISS_1	IPR036396,IPR017972,IPR002401,IPR001128	flavonoid 3'-monooxygenase	Cytochrome P450 superfamily protein	LOC_Os10g17260	0.59	0.99	0.91	148.067	482.197	158.777	76.17	1.70337	0.100752	-0.958952	0.87763	0.198369	0.75462	K05280|1|4e-160|562|pop:POPTR_823742|flavonoid 3'-monooxygenase [EC:1.14.13.21]		-	GO:0016491//oxidoreductase activity;GO:0005506//iron ion binding	-	COCehwD016687.1	CN01_05P001950
CN01_05P001670	CN01_05G001670	#N/A	#N/A	RBG3,RBG5,RBG2,RBG4,LOC103698804,LOC103708259,103997144,LOC103704472	#N/A	Ea+	687	modules	ISS_3	IPR000504,IPR012677,IPR035979	putative Glycine-rich RNA-binding protein 4, mitochondrial	glycine-rich RNA-binding protein 3	LOC_Os10g17454	0.41	0.99	0.99	169.72	450.29	85.1367	88.17	1.4077	-0.995304	-0.944797	0.852536	0.763352	0.75243	K02965|1|5e-20|95.9|ath:AT5G47320|small subunit ribosomal protein S19;K13195|2|7e-20|95.5|pop:POPTR_712972|cold-inducible RNA-binding protein;K11294|3|2e-16|84.0|smo:SELMODRAFT_15428|nucleolin;K14411|5|3e-14|76.6|gmx:100795907|RNA-binding protein Musashi		GO:0043231//intracellular membrane-bounded organelle	GO:0046914//transition metal ion binding;GO:0032559	-	COCehwD003430.1	CN01_05P001670
CN01_scaffold044905P000020	CN01_scaffold044905G000020	#N/A	#N/A	XTH22,XTH23,XTH25,XTH20,LOC103711946,103997615,ACMD2_22432,XTH1	#N/A	Ea+	840	complete	ISS_1	IPR008264,IPR013320,IPR010713,IPR000757,IPR008263,IPR016455	xyloglucan endotransglucosylase/hydrolase protein 22	xyloglucan endotransglucosylase/hydrolase 25	LOC_Os06g48200	0.66	0.93	0.95	145.44	443.453	81.4633	133.805	1.60836	-0.836201	-0.120292	0.870601	0.710338	0.21991	K08235|1|6e-117|418|vvi:100252949|xyloglucan:xyloglucosyl transferase [EC:2.4.1.207];K14504|2|7e-116|414|vvi:100256520|xyloglucan:xyloglucosyl transferase TCH4 [EC:2.4.1.207]		GO:0005576//extracellular region;GO:0030312//external encapsulating structure	GO:0016798//hydrolase activity, acting on glycosyl bonds;GO:0016758//transferase activity, transferring hexosyl groups	GO:0044042//glucan metabolic process	COCehwD018703.2	CN01_U03P006550
CN01_07P015340	CN01_07G015340	#N/A	#N/A	RPL13B,RPL13D,LOC103703810,LOC103696488	#N/A	Ea+	624	complete	ISS_1	IPR001380,IPR018256	60S ribosomal protein L13-1	breast basic conserved 1	LOC_Os03g37970	0.89	0.95	0.95	200.4	434.377	176.903	165.725	1.11606	-0.179921	-0.274091	0.815882	0.286373	0.38472	K02873|1|8e-101|363|rcu:RCOM_1318700|large subunit ribosomal protein L13e		GO:0030529//ribonucleoprotein complex	GO:0005198//structural molecule activity	GO:0010467//gene expression	COCehwD004835.1	CN01_07P015340
CN01_10P003130	CN01_10G003130	#N/A	#N/A	MARD1,SPI,OFUT9,LOC103704626,LOC103710804,AXF42_Ash013363,AXF42_Ash001283	#N/A	Ea+	327	fragment	ISS_3	IPR007650	putative FCS-Like Zinc finger 3	Protein of unknown function (DUF581)	LOC_Os04g49660	0.53	0.81	0.7	122.773	426.65	116.187	95.81	1.79706	-0.0795527	-0.357749	0.882865	0.169721	0.46019	-		-	-	-	COCehwD017334.1	CN01_10P003130
CN01_contig69093274P000010	CN01_contig69093274G000010	ABA	MYB	CPC,ETC3,TRY,ETC1,LOC103719112,LOC103717624,LOC104585664,VIT_12s0059g02360	5	Ea+	222	complete	ISS_1	IPR001005,IPR015495,IPR017930,IPR009057	transcription factor CPC	myb domain protein 5	LOC_Os01g50110	0.58	0.66	0.18	144.397	424.887	260.717	203.675	1.55704	0.852445	0.496231	0.866076	0.720742	0.568961	K09422|1|6e-12|67.0|sbi:SORBI_03g028170|myb proto-oncogene protein, plant		GO:0043231//intracellular membrane-bounded organelle	GO:0003676//nucleic acid binding	-	COCehwD000118.1	CN01_U03P022960
CN01_07P005890	CN01_07G005890	ABA	LTP,2S	At4g12490,EARLI1,At4g12500,LOC103705143,TCM_016003,EUTSA_v10023747mg,CQW23_00478	19	Ea+	447	complete	ISS_1	IPR036312,IPR016140,IPR027923	14 kDa proline-rich protein DC2.15-like	Bifunctional inhibitor/lipid-transfer protein/seed storage 2S albumin superfamily protein	LOC_Os04g46810	0.56	0.99	0.99	178.87	390.137	134.457	152.02	1.12507	-0.41177	-0.23465	0.817848	0.495677	0.343575	-		GO:0031410//cytoplasmic vesicle	-	GO:0010876//lipid localization	COCehwD016857.1	CN01_07P005890
CN01_06P011270	CN01_06G011270	#N/A	#N/A	VUP1,VUP4,VUP3,VUP2,LOC103723109,LOC103722446	#N/A	Ea+	558	complete	ISS_1	IPR039280	vascular-relatedprotein 1	#N/A	LOC_Os04g53560	0.28	0.88	0.88	113.023	379.297	190.073	150.415	1.74671	0.749935	0.412328	0.880127	0.685227	0.503411	-		-	-	-	COCehwD005937.1	CN01_06P011270
CN01_13P002840	CN01_13G002840	#N/A	#N/A	EF1,REFA1,LR48_Vigan02g190700,ACMD2_00165	#N/A	Ea+	1170	complete	ISS_2	IPR004161,IPR000795,IPR004160,IPR009001,IPR031157,IPR009000,IPR027417	Elongation factor 1-alpha	GTP binding Elongation factor Tu family protein	LOC_Os03g08020	0.82	0.97	0.97	169.19	377.937	173.58	155.55	1.1595	0.0369564	-0.121266	0.823104	0.114384	0.220964	K03231|1|0.0|699|rcu:RCOM_1101130|elongation factor 1-alpha		GO:0044424//intracellular part	GO:0016772//transferase activity, transferring phosphorus-containing groups;GO:0017111//nucleoside-triphosphatase activity;GO:0008135//translation factor activity, nucleic acid binding;GO:0032561//guanyl ribonucleotide binding	GO:0006412//translation;GO:0009207	COCehwD021173.2	CN01_13P002840
CN01_06P006360	CN01_06G006360	#N/A	#N/A	LOC103713213,LOC104599508,MIMGU_mgv1a015373mg,101250571	#N/A	Ea+	486	complete	ISS_1	IPR039876,IPR019380	28 kDa heat- and acid-stable phosphoprotein	#N/A	LOC_Os01g54920	0.75	0.99	0.99	167.777	372.963	244.693	309.805	1.15249	0.544433	0.884818	0.820856	0.586826	0.739143	-		-	-	-	COCehwD022556.1	CN01_06P006360
CN01_scaffold001518P000030	CN01_scaffold001518G000030	#N/A	#N/A	RPL19B,RPL19C,RPL19A,RPL19,LOC103721680,LOC103695997,103990711	#N/A	Ea+	648	complete	ISS_1	IPR015972,IPR035970,IPR000196,IPR023638,IPR033935,IPR039547	60S ribosomal protein L19-3	Ribosomal protein L19e family protein	LOC_Os03g38260	0.87	1	1	163.22	372.497	188.077	201.375	1.19041	0.204503	0.303067	0.827843	0.307251	0.412985	K02885|1|5e-75|278|gmx:100499920|large subunit ribosomal protein L19e		GO:0030529//ribonucleoprotein complex	-	-	COCehwD005978.1	CN01_U02P018400
CN01_06P005180	CN01_06G005180	#N/A	#N/A	RPL37A,Os01g0679700,Os05g0557000,LOC103709509,PRUPE_ppa013350mg,LOC103715591	#N/A	Ea+	279	complete	ISS_1	IPR002674,IPR011332,IPR011331	60S ribosomal protein L37a	Zinc-binding ribosomal protein family protein	LOC_Os05g48320	0.96	0.98	0.98	155.633	358.973	165.92	172.145	1.20573	0.0923367	0.145473	0.829664	0.18633	0.255006	K02921|1|1e-47|185|gmx:100499850|large subunit ribosomal protein L37Ae		GO:0030529//ribonucleoprotein complex	GO:0043169//cation binding;GO:0005198//structural molecule activity	GO:0010467//gene expression	COCehwD017279.1	CN01_06P005180
CN01_03P013720	CN01_03G013720	#N/A	#N/A	Os04g0650000,RD21B,RD21A,RD21C,LOC103707326,LOC104611580,TCM_029686,RD21A_1	#N/A	Ea+	1479	complete	ISS_1	IPR039417,IPR000118,IPR013201,IPR000668,IPR025660,IPR037277,IPR038765,IPR000169,IPR025661	low-temperature-induced cysteine proteinase	Granulin repeat cysteine protease family protein	LOC_Os04g57440	0.45	0.89	0.93	145.683	321.353	249.737	135.295	1.14132	0.777572	-0.106727	0.81849	0.698424	0.207718	K01376|1|1e-106|385|aly:ARALYDRAFT_473866|[EC:3.4.22.-];K01365|4|5e-105|379|smo:SELMODRAFT_183539|cathepsin L [EC:3.4.22.15];K15272|5|7e-91|332|vvi:100248746|solute carrier family 35 (UDP-sugar transporter), member A1/2/3		-	GO:0008233//peptidase activity	-	COCehwD026784.1	CN01_03P013720
CN01_11P001510	CN01_11G001510	#N/A	#N/A	Os04g0650000,RD21A,RD21B,Os04g0670200,LOC103712059,LOC103711928,CPRF,100037824	#N/A	Ea+	1377	complete	ISS_1	IPR013201,IPR000118,IPR000668,IPR025661,IPR038765,IPR025660,IPR037277,IPR039417,IPR000169	oryzain alpha chain	Granulin repeat cysteine protease family protein	LOC_Os04g57490	0.56	0.95	0.92	125.007	303.34	159.56	122.57	1.27893	0.352094	-0.0283991	0.836789	0.447248	0.0984355	K01376|1|7e-152|535|ath:AT1G47128|[EC:3.4.22.-];K01365|4|2e-108|390|smo:SELMODRAFT_183539|cathepsin L [EC:3.4.22.15]		-	GO:0070011//peptidase activity, acting on L-amino acid peptides	-	COCehwD017867.1	CN01_11P001510
CN01_09P009430	CN01_09G009430	#N/A	#N/A	RPL23A,RPL23,rpl14,Os03g0139100,103980731	#N/A	Ea+	423	complete	ISS_1	IPR019972,IPR000218,IPR036853	60S ribosomal protein L23	Ribosomal protein L14p/L23e family protein	LOC_Os02g56960	1	0.99	0.99	127.883	298.84	146.5	117.805	1.22455	0.196072	-0.118427	0.82985	0.305182	0.21893	K02894|1|3e-77|284|zma:100303995|large subunit ribosomal protein L23e		GO:0015934//large ribosomal subunit	GO:0005198//structural molecule activity	GO:0003006//developmental process involved in reproduction;GO:0010467//gene expression	COCehwD019213.1	CN01_09P009430
CN01_05P007730	CN01_05G007730	#N/A	FKBP	PARV12.8,PIN1,At5g19370,LOC103702774,TorRG33x02_022560,L484_015964	#N/A	Ea+	438	complete	ISS_1	IPR000297,IPR023058	peptidyl-prolyl cis-trans isomerase NIMA-interacting 4	FKBP-like peptidyl-prolyl cis-trans isomerase family protein	LOC_Os09g24540	0.81	0.99	0.99	116.147	289.357	127.163	138.74	1.3169	0.130735	0.256436	0.841038	0.229754	0.371162	K09579|1|8e-57|216|rcu:RCOM_1471300|peptidyl-prolyl cis-trans isomerase NIMA-interacting 4 [EC:5.2.1.8]		-	-	-	COCehwD015822.1	CN01_05P007730
CN01_11P001320	CN01_11G001320	#N/A	#N/A	IJ,Ij,At1g67620,ARF1,LOC103711927,103981051,LOC104606911,Ij_0	#N/A	Ea+	636	complete	ISS_1	IPR004394	protein Iojap, chloroplastic	Lojap-related protein	LOC_Os09g32030	0.78	0.71	0.66	96.99	280.56	141.627	130.665	1.5324	0.546185	0.429965	0.861193	0.584978	0.515467	-		-	-	-	COCehwD011229.1	CN01_11P001320
CN01_08P008030	CN01_08G008030	#N/A	#N/A	RPL9,RPL9B,RPL9D,LOC103706408,LOC103703525,AMTR_s00018p00131950	#N/A	Ea+	570	complete	ISS_1	IPR036789,IPR020040,IPR000702,IPR002359	60S ribosomal protein L9	Ribosomal protein L6 family	LOC_Os09g31180	0.89	0.99	0.99	98.6567	260.17	65.8733	72.025	1.39897	-0.582722	-0.453919	0.848287	0.595258	0.524844	K02940|1|7e-94|340|osa:4347422|large subunit ribosomal protein L9e		GO:0030529//ribonucleoprotein complex	GO:0003723//RNA binding;GO:0005198//structural molecule activity	GO:0010467//gene expression	COCehwD008598.1	CN01_08P008030
CN01_02P005280	CN01_02G005280	#N/A	#N/A	PMEI3,PMEI10,PMEI9,LOC103716316,LOC103695796,103996446,21KD_6	#N/A	Ea+	576	complete	ISS_1	IPR035513,IPR006501	21 kDa protein	Plant invertase/pectin methylesterase inhibitor superfamily protein	LOC_Os10g10620	0.42	0.84	0.81	103.27	228.99	71.9733	85.655	1.14886	-0.520887	-0.269812	0.817255	0.562921	0.376617	K01051|1|5e-11|65.5|aly:ARALYDRAFT_478847|pectinesterase [EC:3.1.1.11]		-	-	-	COCehwD012476.1	CN01_02P005280
CN01_16P002530	CN01_16G002530	#N/A	#N/A	ERD15,CID2,DMS3,LOC103714674,LOC103705601	#N/A	Ea+	594	complete	ISS_1	IPR009818,IPR040414	protein EARLY RESPONSIVE TO DEHYDRATION 15	dehydration-induced protein (ERD15)	LOC_Os03g23010	0.78	0.24	0.3	82.5567	222.353	68.72	47.215	1.4294	-0.264655	-0.806139	0.850191	0.355631	0.695818	-		-	-	-	COCehwD023950.1	CN01_16P002530
CN01_13P004400	CN01_13G004400	#N/A	#N/A	PAT,AAT,TAT,LOC103712523,ACMD2_23440,ACMD2_13998,CQW23_09808	#N/A	Ea+	1101	complete	ISS_2	IPR015421,IPR015422,IPR015424,IPR004839	Methionine aminotransferase	Pyridoxal phosphate (PLP)-dependent transferases superfamily protein	LOC_Os09g28050	0.86	0.99	0.99	87.99	220.017	99.53	88.515	1.3222	0.177792	0.00858239	0.838713	0.280009	0.0680955	K15849|1|3e-46|184|vvi:100245826|bifunctional aspartate aminotransferase and glutamate/aspartate-prephenate aminotransferase [EC:2.6.1.1 2.6.1.78 2.6.1.79]		GO:0043231//intracellular membrane-bounded organelle	GO:0008483//transaminase activity;GO:0048037//cofactor binding;GO:0016846//carbon-sulfur lyase activity	GO:0008652//cellular amino acid biosynthetic process	COCehwD020793.1	CN01_13P004400
CN01_01P013430	CN01_01G013430	#N/A	#N/A	LOC103716461,LOC103708715,ACMD2_00839	#N/A	Ea+	1818	complete	ISS_1	IPR001678,IPR029063,IPR011023,IPR031341,IPR023267,IPR023273,IPR018314	25S rRNA (cytosine-C(5))-methyltransferase nop2	S-adenosyl-L-methionine-dependent methyltransferases superfamily protein	LOC_Os09g37860	0.73	0.78	0.68	97.3433	219.047	43.8633	64.47	1.17008	-1.15007	-0.594454	0.820931	0.786821	0.60996	K14835|1|0.0|688|vvi:100265196|ribosomal RNA methyltransferase Nop2 [EC:2.1.1.-]		GO:0043231//intracellular membrane-bounded organelle	GO:0008168//methyltransferase activity	GO:0044237//cellular metabolic process	COCehwD011902.1	CN01_01P013430
CN01_06P007390	CN01_06G007390	#N/A	#N/A	RPL35AC,RPL35AA,RPL35AB,RPL35AD,LOC103715133,LOC103723425,LOC103715952	#N/A	Ea+	339	complete	ISS_1	IPR001780,IPR009000,IPR038661,IPR018266	60S ribosomal protein L35a-1	Ribosomal protein L35Ae family protein	LOC_Os02g54470	0.92	0.99	0.99	95.6533	214.763	107.217	107.6	1.16686	0.164642	0.169791	0.820656	0.260463	0.273529	K02917|1|6e-58|219|vvi:100258134|large subunit ribosomal protein L35Ae		GO:0043231//intracellular membrane-bounded organelle;GO:0030529//ribonucleoprotein complex	GO:0005198//structural molecule activity	GO:0010467//gene expression	COCehwD007149.1	CN01_06P007390
CN01_06P004840	CN01_06G004840	#N/A	#N/A	PCMP-H66,PCMP-H63,PCMP-H75,PCMP-H87,LOC103721816,ACMD2_20416	#N/A	Ea+	1176	fragment	ISS_3	IPR002885,IPR032867,IPR011990	putative Pentatricopeptide repeat-containing protein At2g15690, mitochondrial	Tetratricopeptide repeat (TPR)-like superfamily protein	LOC_Os01g53610	0.43	0.99	0.52	81.0633	212.807	106.39	92.62	1.39242	0.392241	0.192274	0.845528	0.471538	0.29442	K15078|1|1e-60|231|vvi:100250139|structure-specific endonuclease subunit SLX1 [EC:3.6.1.-];K03798|2|3e-23|107|rcu:RCOM_0340700|cell division protease FtsH [EC:3.4.24.-];K15271|4|1e-22|105|rcu:RCOM_1095670|ATP-dependent DNA helicase HFM1/MER3 [EC:3.6.4.12]		GO:0043231//intracellular membrane-bounded organelle	-	-	COCehwD026768.1	CN01_06P004840
CN01_contig69365467P000010	CN01_contig69365467G000010	#N/A	#N/A	MORF9,DAG,MORF3,MORF1,LOC103712622,ACMD2_22151,ACMD2_00494	#N/A	Ea+	336	fragment	ISS_3	IPR039206	putative Multiple organellar RNA editing factor 9, chloroplastic	plastid developmental protein DAG, putative	LOC_Os08g04450	0.86	0.99	0.48	82.6133	210.78	83.69	69.14	1.35129	0.0186806	-0.256854	0.841521	0.0908452	0.361796	K06236|1|8e-12|66.6|pop:POPTR_584471|collagen, type I/II/III/V/XI, alpha		GO:0009536//plastid	-	-	COCehwD000393.1	COCehwD000393.1
CN01_13P002330	CN01_13G002330	#N/A	#N/A	Os02g0576700,OsI_07785,NRP2,H0219H12.3,ACMD2_18018,BVC80_9097g89,LOC103716423,LOC103700476	#N/A	Ea+	783	complete	ISS_1	IPR037231,IPR002164	NAP1-related protein 2	NAP1-related protein 2	LOC_Os02g36710	0.74	0.85	0.87	62.2167	186.063	48.3233	54.755	1.58042	-0.364581	-0.18431	0.862345	0.433928	0.274499	K11290|1|4e-86|315|vvi:100249121|template-activating factor I		-	-	-	COCehwD003288.2	CN01_13P002330
CN01_scaffold024639P000010	CN01_scaffold024639G000010	ABA	MYB,SANT	GT-3B,GT-4,GT-3A,GT-1,LOC103722876,ACMD2_01231,103999362	#N/A	Ea+	738	fragment	ISS_3	IPR017877,IPR001005	putative ribonuclease J	RNA-metabolising metallo-beta-lactamase family protein	LOC_Os02g33610	0.44	0.99	0.26	64.21	182.247	61.7433	65.96	1.50502	-0.0565146	0.0387934	0.85602	0.131352	0.108093	-		-	-	-	COCehwD011556.1	CN01_U03P010730
CN01_11P010510	CN01_11G010510	#N/A	#N/A	PSRP2,CP33,LOC103702297,ACMD2_15141,BVC80_8919g30,LOC104597519	#N/A	Ea+	756	complete	ISS_1	IPR035979,IPR012677,IPR000504	30S ribosomal protein 2, chloroplastic	RNA-binding (RRM/RBD/RNP motifs) family protein	LOC_Os09g10760	0.69	0.73	0.75	82.6467	179.547	55.63	50.71	1.11933	-0.571094	-0.704686	0.808619	0.582558	0.656101	K11294|1|4e-25|113|smo:SELMODRAFT_15428|nucleolin;K13126|2|4e-19|93.2|cre:CHLREDRAFT_116226|polyadenylate-binding protein		GO:0009526//plastid envelope;GO:0009532//plastid stroma;GO:0009534//chloroplast thylakoid;GO:0032991//macromolecular complex	GO:0003676//nucleic acid binding	-	COCehwD001356.1	CN01_11P010510
CN01_02P012070	CN01_02G012070	#N/A	#N/A	RABD1,YPTM1,RABD2C,RABD2A,LOC103701625,LOC103704765,BVC80_1729g32,103988051	#N/A	Ea+	417	fragment	ISS_3	IPR001806,IPR027417	putative Ras-related protein RABD1	RAS 5	LOC_Os02g43690	0.54	0.98	0.89	70.7733	177.567	69.53	85.24	1.32708	-0.0255703	0.268325	0.837451	0.0999945	0.372486	K07976|1|4e-35|144|ath:AT3G11730|Rab family, other;K07874|2|6e-35|144|vvi:100248422|Ras-related protein Rab-1A		GO:0031410//cytoplasmic vesicle	GO:0032561//guanyl ribonucleotide binding;GO:0003824//catalytic activity	GO:0035556//intracellular signal transduction;GO:0006810//transport	COCehwD022234.1	CN01_02P012070
CN01_scaffold001446P000020	CN01_scaffold001446G000020	#N/A	#N/A	RH50,LOC103722041,VIT_09s0018g01610,104000144,CFP56_32834	#N/A	Ea+	816	fragment	ISS_4	#N/A	conserved hypothetical protein	#N/A	LOC_Os08g16570	0.83	0.85	0.86	78.62	174.517	141.43	107.94	1.1504	0.84712	0.457261	0.813951	0.712551	0.533177	-		GO:0005576//extracellular region;GO:0009532//plastid stroma	GO:0003824//catalytic activity;GO:0048037//cofactor binding	-	COCehwD005312.2	CN01_U03P006900
CN01_07P014990	CN01_07G014990	#N/A	#N/A	CDSP32,Os03g0800700,Os07g0190800,LOC103703827,103994433,LOC104603676,BVC80_8809g22	#N/A	Ea+	894	complete	ISS_1	IPR036249,IPR013766	thioredoxin-like protein CDSP32, chloroplastic	chloroplastic drought-induced stress protein of 32 kD	LOC_Os07g29410	0.66	1	1	71.7533	173.89	140.893	102.29	1.27706	0.973486	0.511547	0.831368	0.749204	0.566093	K03671|1|1e-09|62.0|smo:SELMODRAFT_94818|thioredoxin 1		-	-	-	COCehwD015711.1	CN01_07P014990
CN01_06P002250	CN01_06G002250	#N/A	#N/A	matK,At1g55090,WAVE5,LOC103712945,103996315,MA16_Dca016765,LOC104588200	#N/A	Ea+	987	complete	ISS_4	IPR021920	conserved hypothetical protein	Protein of unknown function (DUF3531)	LOC_Os01g37820	0.73	0.62	0.73	73.58	172.05	83.1167	66.25	1.22544	0.175824	-0.151393	0.825284	0.276865	0.245724	-		-	-	-	COCehwD016881.1	CN01_06P002250
CN01_06P012540	CN01_06G012540	#N/A	#N/A	At5g53940,At3g55890,At3g08990,BVC80_1183g42,LOC104608168,VIT_19s0014g02250,102584877	#N/A	Ea+	384	complete	ISS_1	IPR004910,IPR034751,IPR039058	protein yippee-like At5g53940	Yippee family putative zinc-binding protein	LOC_Os03g49150	0.57	0.98	0.98	79.1467	170.99	103.933	143.97	1.11131	0.393058	0.863168	0.80644	0.471063	0.724583	-		-	-	-	COCehwD024796.1	CN01_06P012540
CN01_scaffold016225P000040	CN01_scaffold016225G000040	#N/A	#N/A	ATJ8,ERDJ3A,ATJ1,ATJ72,LOC103711017,ACMD2_04379,LOC103722135	#N/A	Ea+	483	complete	ISS_2	IPR001623,IPR036869	chaperone protein dnaJ 8, chloroplastic	Chaperone DnaJ-domain superfamily protein	LOC_Os06g44160	0.45	0.64	0.74	35.4933	168.57	62.0567	41.015	2.24773	0.806038	0.208604	0.894212	0.674189	0.289184	K09517|1|1e-07|53.5|pop:POPTR_572634|DnaJ homolog subfamily B member 11;K09510|2|4e-07|52.0|bdi:100832977|DnaJ homolog subfamily B member 4;K09519|5|1e-06|50.4|sbi:SORBI_09g002340|DnaJ homolog subfamily B member 13		-	-	-	COCehwD006691.1	CN01_U02P011710
CN01_07P015320	CN01_07G015320	#N/A	#N/A	At4g11060,PIGA,MRE11,rpoC1,LOC103714527,BVC80_8779g18,103997562,103995102	#N/A	Ea+	546	complete	ISS_2	IPR000424,IPR012340,IPR011344	Single-stranded DNA-binding protein, mitochondrial	mitochondrially targeted single-stranded DNA binding protein	LOC_Os05g43440	0.75	0.98	0.87	59.39	164.337	67.25	65.21	1.46836	0.179314	0.134873	0.850322	0.273204	0.222278	K03111|1|8e-24|107|rcu:RCOM_1618400|single-strand DNA-binding protein		GO:0043231//intracellular membrane-bounded organelle	GO:0043566//structure-specific DNA binding	GO:0006259//DNA metabolic process	COCehwD017538.1	CN01_07P015320
CN01_10P008740	CN01_10G008740	#N/A	#N/A	CBP3,SCPL49,LOC103718598,103970187	#N/A	Ea+	1647	complete	ISS_2	IPR029058,IPR018202,IPR001563,IPR033124	Serine carboxypeptidase 3	SERINE CARBOXYPEPTIDASE-LIKE 49	LOC_Os02g02320	0.67	0.93	0.94	66.86	154.66	61.4167	44.355	1.20988	-0.122513	-0.592047	0.821373	0.212827	0.595828	K13289|1|0.0|701|rcu:RCOM_0721950|cathepsin A (carboxypeptidase C) [EC:3.4.16.5]		GO:0031410//cytoplasmic vesicle	GO:0004180//carboxypeptidase activity	GO:0019538//protein metabolic process	COCehwD007961.2	CN01_10P008740
CN01_12P003850	CN01_12G003850	#N/A	#N/A	CYP71A9,CYP71A1,CYP71D55,CYP71B36,LOC103698478,LOC103698407,LOC103724080,LOC103724206	#N/A	Ea+	1539	complete	ISS_2	IPR001128,IPR036396,IPR017972,IPR002401	Cytochrome P450 71A9	cytochrome P450, family 71, subfamily B, polypeptide 36	LOC_Os03g39760	0.42	0.96	0.97	33.43	154.623	20.6867	21.275	2.20954	-0.692442	-0.651984	0.892073	0.58797	0.575282	K00517|1|1e-111|402|ath:AT3G26320|[EC:1.14.-.-]		GO:0016020//membrane	GO:0046872//metal ion binding;GO:0016491//oxidoreductase activity	-	COCehwD024593.1	CN01_12P003850
CN01_03P007100	CN01_03G007100	#N/A	#N/A	COX6B-1,COX6B-3,COX6B-2,At1g32710,LOC103717968,LOC103701778,103994857,103991430	#N/A	Ea+	486	complete	ISS_1	IPR003213,IPR036549	cytochrome c oxidase subunit 6b-1	cytochrome C oxidase 6B	LOC_Os03g27290	0.59	0.96	0.99	66.05	153.26	103.53	113.34	1.21435	0.648418	0.779027	0.821276	0.629904	0.695286	K02267|1|1e-45|180|osa:4333018|cytochrome c oxidase subunit 6b		GO:0005746//mitochondrial respiratory chain	-	GO:0022904//respiratory electron transport chain	COCehwD020622.1	CN01_03P007100
CN01_12P005810	CN01_12G005810	#N/A	#N/A	CWINV1,RBL10,MED33B,LOC103709101,LOC103705992,103992486	#N/A	Ea+	978	complete	ISS_4	#N/A	conserved hypothetical protein	#N/A	LOC_Os12g03060	0.58	0.96	0.96	68.39	151.783	89.5567	94.375	1.15016	0.389015	0.464619	0.811806	0.467305	0.529933	-		GO:0031410//cytoplasmic vesicle	-	-	COCehwD023591.1	CN01_12P005810
CN01_05P005460	CN01_05G005460	#N/A	#N/A	CP33,PSRP2,LOC103696125,103997970,ACMD2_21488,ACMD2_05666	#N/A	Ea+	867	complete	ISS_1	IPR000504,IPR035979,IPR012677	29 kDa ribonucleoprotein B, chloroplastic	RNA-binding (RRM/RBD/RNP motifs) family protein	LOC_Os04g50110	0.4	0.7	0.73	66.6467	150.44	99.23	92.59	1.17458	0.574244	0.474324	0.815834	0.588232	0.535211	K11294|1|6e-17|86.3|smo:SELMODRAFT_15428|nucleolin;K13126|5|4e-11|67.0|cre:CHLREDRAFT_116226|polyadenylate-binding protein		-	-	-	COCehwD023815.1	CN01_05P005460
CN01_02P014500	CN01_02G014500	#N/A	#N/A	ASNAP2,ASNAP1,LOC103721481,LOC103706521	#N/A	Ea+	900	complete	ISS_2	IPR019734,IPR013026,IPR011990,IPR000744	Alpha-soluble NSF attachment protein	alpha-soluble NSF attachment protein 2	LOC_Os08g18110	0.69	0.96	0.91	62.4933	149.11	56.34	56.47	1.2546	-0.149543	-0.146218	0.82616	0.241785	0.241635	K15296|1|2e-113|407|zma:100282813|alpha-soluble NSF attachment protein		-	-	GO:0015031//protein transport	COCehwD018483.2	CN01_02P014500
CN01_14P000200	CN01_14G000200	#N/A	#N/A	RPL35AC,RPL35AA,RPL35AB,RPL35AD,LOC103715133,LOC103723425,LOC103715952	#N/A	Ea+	339	complete	ISS_1	IPR018266,IPR001780,IPR009000,IPR038661	60S ribosomal protein L35a-1	Ribosomal protein L35Ae family protein	LOC_Os02g54470	0.92	0.99	0.99	60.1167	144.153	54.7	52.385	1.26177	-0.136224	-0.198611	0.826539	0.230691	0.294201	K02917|1|6e-58|219|vvi:100258134|large subunit ribosomal protein L35Ae		GO:0043231//intracellular membrane-bounded organelle;GO:0030529//ribonucleoprotein complex	GO:0005198//structural molecule activity	GO:0010467//gene expression	COCehwD009051.1	CN01_14P000200
CN01_16P002110	CN01_16G002110	#N/A	#N/A	BRN1,ROPGEF14,LOC103698262,MA16_Dca013218,OsI_01351,OsJ_01253	#N/A	Ea+	1182	complete	ISS_4	#N/A	conserved hypothetical protein	#N/A	LOC_Os01g16620	0.64	0.31	0.56	42.2	141.207	35.2533	64.645	1.74249	-0.259483	0.615296	0.870553	0.332313	0.608855	-		-	-	-	COCehwD017728.1	CN01_16P002110
CN01_09P007250	CN01_09G007250	#N/A	#N/A	BIP5,BIP4,MED37F,GSCOC_T00035607001,MANES_02G006000,LOC103482828,LOC103712101	#N/A	Ea+	2031	complete	ISS_1	IPR018181,IPR042050,IPR029048,IPR013126,IPR029047	Luminal-binding protein 5	Heat shock protein 70 (Hsp 70) family protein	LOC_Os02g02410	0.92	0.95	0.97	6.15667	140.687	5.40333	8.905	4.51419	-0.1883	0.532466	0.917491	0.16013	0.34272	K09490|1|0.0|1093|pop:POPTR_829431|heat shock 70kDa protein 5		GO:0044432//endoplasmic reticulum part	GO:0016628//oxidoreductase activity, acting on the CH-CH group of donors, NAD or NADP as acceptor;GO:0032559	GO:0050896//response to stimulus;GO:0008152//metabolic process	COCehwD021842.1	CN01_09P007250
CN01_scaffold009229P000010	CN01_scaffold009229G000010	#N/A	#N/A	AHL10,AHL14,AHL3,AHL9,LOC103697600,LOC104610073,LOC104600822,AQUCO_01700673v1	#N/A	Ea+	1002	complete	ISS_1	IPR005175,IPR039605	AT-hook motif nuclear-localized protein 14	AT hook motif DNA-binding family protein	LOC_Os10g42230	0.44	0.65	0.56	61.9233	140.167	139.22	119.685	1.17859	1.16881	0.950687	0.815896	0.797708	0.748112	-		-	-	-	COCehwD027245.1	CN01_U02P005550
CN01_07P012310	CN01_07G012310	#N/A	#N/A	TL17,TL20.3,At2g44920,LOC103712102,CICLE_v10021983mg,LOC104594306,CUMW_238510	#N/A	Ea+	561	fragment	ISS_3	IPR001646	putative Thylakoid lumenal 17.4 kDa protein, chloroplastic	Tetratricopeptide repeat (TPR)-like superfamily protein	LOC_Os10g35810	0.79	0.92	0.73	52.84	136.62	100.093	75.75	1.37047	0.921644	0.519615	0.837168	0.728554	0.56213	-		-	-	-	COCehwD023425.1	CN01_07P012310
CN01_14P003870	CN01_14G003870	#N/A	#N/A	CGL160,KIN4A,QKY,THI2.2,LOC103709459,103996124,MA16_Dca011650,atpI_10	#N/A	Ea+	990	complete	ISS_2	#N/A	Protein CONSERVED ONLY IN THE GREEN LINEAGE 160, chloroplastic	ATP synthase protein I -related	LOC_Os01g48300	0.59	0.9	0.89	47.1233	134.013	91.86	62.53	1.50786	0.962995	0.408107	0.851502	0.737172	0.479933	K02116|1|5e-81|299|vvi:100243760|ATP synthase protein I		-	-	-	COCehwD004738.1	CN01_14P003870
CN01_scaffold044891P000040	CN01_scaffold044891G000040	#N/A	#N/A	HSP90,HSP90-7,HSP90-1,LOC103720615,ACMD2_03194,103979428,LOC103706334	#N/A	Ea+	2514	complete	ISS_1	IPR037196,IPR036890,IPR003594,IPR020568,IPR001404,IPR020575,IPR019805	endoplasmin	Chaperone protein htpG family protein	LOC_Os06g50300	0.84	0.92	0.93	49.62	132.89	38.8233	42.77	1.42124	-0.353998	-0.214323	0.842445	0.415905	0.297466	K09487|1|0.0|1122|vvi:100267648|heat shock protein 90kDa beta		GO:0044432//endoplasmic reticulum part;GO:0031410//cytoplasmic vesicle	GO:0005515//protein binding;GO:0032559	GO:0050896//response to stimulus;GO:0044267//cellular protein metabolic process	COCehwD018701.1	CN01_U03P000910
CN01_02P002340	CN01_02G002340	#N/A	#N/A	HSP17.9,HSP19.0,HSP17.8,HSP23.2,LOC103710269,HSP17.6A	#N/A	Ea+	645	complete	ISS_3	IPR002068,IPR008978	putative 17.6 kDa class I heat shock protein 1	17.6 kDa class II heat shock protein	LOC_Os01g08860	0.23	0.43	0.54	20.81	131.603	7	14.32	2.66085	-1.57185	-0.539245	0.900012	0.736938	0.467313	K13993|1|2e-39|160|rcu:RCOM_0539830|HSP20 family protein		-	-	-	COCehwD010099.1	CN01_02P002340
CN01_07P008000	CN01_07G008000	#N/A	#N/A	At5g52780,PAM68,SD18,AAP4,LOC103718492,BVC80_1265g30,AMTR_s00016p00088520,LOC104600213	#N/A	Ea+	438	missing_functional_completeness	ISS_4	IPR021855	conserved hypothetical protein	Protein of unknown function (DUF3464)	LOC_Os10g38910	0.55	0.74	0.49	61.1967	131.563	137.157	115.785	1.10423	1.1643	0.919923	0.80079	0.796136	0.737161	-		GO:0009534//chloroplast thylakoid	-	-	COCehwD018957.1	CN01_07P008000
CN01_09P004440	CN01_09G004440	#N/A	#N/A	UBC28,UBC10,UBC8,LOC103719240,103978721	#N/A	Ea+	564	modules	ISS_3	IPR016135,IPR023313,IPR000608	putative Ubiquitin-conjugating enzyme E2-17 kDa	ubiquitin-conjugating enzyme 28	LOC_Os02g02830	0.9	0.78	0.98	59.9967	131.25	41.5767	39.555	1.12936	-0.529108	-0.601022	0.805991	0.547967	0.594921	K06689|1|6e-76|281|vvi:100232965|ubiquitin-conjugating enzyme E2 D/E [EC:6.3.2.19]		-	GO:0019787//small conjugating protein ligase activity;GO:0032559	GO:0032446//protein modification by small protein conjugation	COCehwD026681.2	CN01_09P004440
CN01_01P021340	CN01_01G021340	#N/A	#N/A	MET1B,DMT1,MET1A,MET3,LOC103719507,ACMD2_09435	#N/A	Ea+	336	missing_functional_completeness	ISS_4	#N/A	conserved hypothetical protein	CW-type Zinc Finger	LOC_Os07g47360	0.28	0.59	0.05	29.45	130.81	29.93	38.665	2.15113	0.0233246	0.392761	0.887762	0.086791	0.438308	K00558|1|3e-16|81.3|vvi:100251127|DNA (cytosine-5-)-methyltransferase [EC:2.1.1.37]		-	-	-	COCehwD025731.1	CN01_01P021340
CN01_01P016440	CN01_01G016440	#N/A	#N/A	TUBB1,TUBB6,TUBB4,TUBB2,PanWU01x14_039420,TorRG33x02_352280,L484_013562,VIT_06s0009g02020	#N/A	Ea+	705	fragment	ISS_3	IPR036525,IPR003008,IPR013838,IPR000217,IPR002453,IPR017975	putative Tubulin beta-1 chain	beta-6 tubulin	LOC_Os01g59150	0.95	1	0.52	38.5133	130.463	37.1233	36.205	1.76021	-0.0530317	-0.089169	0.870367	0.116852	0.167376	K07375|1|2e-121|432|vvi:100265052|tubulin beta		GO:0032991//macromolecular complex;GO:0015630//microtubule cytoskeleton	GO:0017111//nucleoside-triphosphatase activity;GO:0032561//guanyl ribonucleotide binding	GO:0043623//cellular protein complex assembly;GO:0009207;GO:0007017//microtubule-based process	COCehwD014381.1	CN01_01P016440
CN01_07P002500	CN01_07G002500	ABA	MYB,TF	MYB1,MYB308,MYB4,LOC103706180,LOC103714603	5	Ea+	711	complete	ISS_1	IPR009057,IPR001005,IPR017930,IPR015495	myb-related protein 308	myb domain protein 4	LOC_Os09g36730	0.67	1	1	49.0833	129.75	51.8067	46.795	1.40243	0.0779045	-0.0688788	0.839534	0.16184	0.144681	K09422|1|1e-95|347|osa:4347711|myb proto-oncogene protein, plant		-	-	-	COCehwD005015.1	CN01_07P002500
CN01_14P007080	CN01_14G007080	#N/A	#N/A	RPS7,LOC103696311,LOC103709967,LOC104602332	#N/A	Ea+	576	complete	ISS_1	IPR000554	40S ribosomal protein S7	Ribosomal protein S7e family protein	LOC_Os03g18580	0.81	0.99	0.98	58.16	129.38	36.6333	35.165	1.15352	-0.66687	-0.725887	0.809061	0.618486	0.651585	K02993|1|6e-92|334|gmx:100500684|small subunit ribosomal protein S7e		-	-	-	COCehwD004330.1	CN01_14P007080
CN01_scaffold003028P000030	CN01_scaffold003028G000030	#N/A	#N/A	SIGD,SIGB,SIGF,SIGA,LOC103719229,103982006,VIT_13s0064g00190,LOC104606336	#N/A	Ea+	1413	complete	ISS_2	IPR013324,IPR000943,IPR013325,IPR007624,IPR007627,IPR014284	RNA polymerase sigma factor sigD, chloroplastic	RNApolymerase sigma subunit 2	LOC_Os03g16430	0.32	0.55	0.76	35.2733	125.6	38.7567	33.53	1.83219	0.135867	-0.0731254	0.873091	0.219825	0.140113	K03086|1|4e-37|154|olu:OSTLU_41331|RNA polymerase primary sigma factor;K03093|3|3e-32|137|rcu:RCOM_0798990|RNA polymerase sigma factor		GO:0009536//plastid	-	GO:0006351//transcription, DNA-dependent;GO:0009639//response to red or far red light	COCehwD013832.1	CN01_U01P013310
CN01_scaffold059329P000010	CN01_scaffold059329G000010	#N/A	#N/A	CFAP54,LOC103723674,104000886	#N/A	Ea+	507	complete	ISS_4	#N/A	conserved hypothetical protein	maternal effect embryo arrest 59	LOC_Os03g15920	0.61	0.98	0.99	33.2633	123.837	51.4167	38.32	1.89643	0.628303	0.204165	0.876105	0.591149	0.278692	-		-	-	-	COCehwD021982.1	CN01_U02P024910
CN01_03P010040	CN01_03G010040	#N/A	#N/A	VAR3,SUA,At1g67325,TAF15,LOC103724379	#N/A	Ea+	1281	complete	ISS_2	IPR036443,IPR001876	zinc finger protein VAR3, chloroplastic	Ran BP2/NZF zinc finger-like superfamily protein	LOC_Os03g50120	0.47	0.68	0.51	57.1633	123.42	66.6333	56.49	1.11041	0.221154	-0.0170945	0.800777	0.311939	0.0772737	K02350|1|1e-39|162|rcu:RCOM_1431670|DNA polymerase zeta subunit [EC:2.7.7.7]		-	-	-	COCehwD002936.1	CN01_03P010040
CN01_08P011650	CN01_08G011650	#N/A	#N/A	PMP22,AP180,At3g44800,APC8,LOC103706938,LOC103711830,ACMD2_03762,L484_011710	#N/A	Ea+	582	complete	ISS_2	IPR007248	Peroxisomal membrane protein PMP22	Peroxisomal membrane 22 kDa (Mpv17/PMP22) family protein	LOC_Os08g45210	0.79	0.89	0.92	56.0933	122.333	97.3267	79.68	1.12492	0.795006	0.506388	0.802108	0.688171	0.557687	K13348|1|1e-35|147|cre:CHLREDRAFT_117624|protein Mpv17		-	-	-	COCehwD011993.1	CN01_08P011650
CN01_10P003160	CN01_10G003160	#N/A	#N/A	RPL37A,Os01g0679700,Os05g0557000,PRUPE_ppa013350mg,LOC103704622	#N/A	Ea+	279	complete	ISS_1	IPR011331,IPR002674,IPR011332	60S ribosomal protein L37a	Zinc-binding ribosomal protein family protein	LOC_Os05g48320	0.96	0.99	0.99	37.9233	121.643	46.4567	50.09	1.6815	0.2928	0.401437	0.864131	0.362822	0.460659	K02921|1|1e-48|188|vvi:100254103|large subunit ribosomal protein L37Ae		-	-	-	COCehwD017337.1	CN01_10P003160
CN01_scaffold014963P000010	CN01_scaffold014963G000010	#N/A	#N/A	SCPL45,At5g06550,RPL5,PDR1,RCOM_1096270,CFP56_34370,103988185,MIMGU_mgv1a018114mg	#N/A	Ea+	213	complete	ISS_4	IPR022251	conserved hypothetical protein	#N/A	LOC_Os04g54220	0.33	0.49	0.46	40.4667	120.307	39.8733	59.47	1.57191	-0.0213098	0.555428	0.854274	0.0881424	0.57282	-		-	-	-	COCehwD005790.1	CN01_U03P011280
CN01_scaffold002087P000010	CN01_scaffold002087G000010	#N/A	#N/A	P58IPK,ATJ39,ERDJ3B,ATJ72,LOC103710537,ACMD2_17013,ACMD2_22455	#N/A	Ea+	663	missing_functional_completeness	ISS_4	IPR001623,IPR036869	conserved hypothetical protein	Chaperone DnaJ-domain superfamily protein	LOC_Os07g28800	0.58	0.96	0.77	31.0867	120.283	65.75	62.555	1.95207	1.08069	1.00883	0.878188	0.758918	0.745828	-		-	-	-	COCehwD009597.1	CN01_U02P003560
CN01_14P010260	CN01_14G010260	#N/A	#N/A	MEE14,PHO1-H6,SUVR2,NLP1,LOC103709159,103982183,yme2_2	#N/A	Ea+	621	complete	ISS_1	IPR037502	CCG-binding protein 1	maternal effect embryo arrest 14	LOC_Os03g55670	0.47	0.79	0.75	34.8933	118.03	28.2933	24.625	1.75813	-0.302489	-0.502828	0.86858	0.355238	0.500699	-		GO:0009536//plastid	-	GO:0006952//defense response;GO:0003006//developmental process involved in reproduction	COCehwD008138.1	CN01_14P010260
CN01_08P010010	CN01_08G010010	#N/A	#N/A	Os06g0731800,CLC2,At2g20760,Os04g0679100,LOC103698093,LOC103716209,AXF42_Ash009949	#N/A	Ea+	1551	modules	ISS_3	IPR000996	putative Clathrin light chain 1	Clathrin light chain protein	LOC_Os04g58240	0.63	0.44	0.73	53.3867	117.403	74.1733	83.09	1.13692	0.474421	0.638195	0.805246	0.517671	0.628171	-		-	-	-	COCehwD020409.1	CN01_08P010010
CN01_02P018610	CN01_02G018610	#N/A	#N/A	PP2A4,PP2A1,IAN10,PP2A2,LOC103714564,LOC103697133	#N/A	Ea+	582	complete	ISS_2	IPR025886	protein PHLOEM PROTEIN 2-LIKE A1	phloem protein 2-A1	LOC_Os01g06500	0.35	0.84	0.66	49.5467	116.803	46.1967	66.305	1.23722	-0.100999	0.42033	0.819676	0.187344	0.489977	-		-	-	-	COCehwD020051.1	CN01_02P018610
CN01_scaffold001962P000020	CN01_scaffold001962G000020	#N/A	#N/A	UGT85A24,UGT85A8,UGT85A23,UGT85A2,LOC103706868,LOC103717956	#N/A	Ea+	1431	complete	ISS_1	IPR002213,IPR035595	7-deoxyloganetin glucosyltransferase	UDP-glucosyl transferase 85A2	LOC_Os04g37820	0.62	1	0.99	18.1267	116.223	8.07333	18.14	2.68071	-1.16688	0.0010608	0.89835	0.659055	0.0504276	K13030|1|3e-125|446|sbi:SORBI_01g001220|cyanohydrin beta-glucosyltransferase [EC:2.4.1.85];K13692|2|4e-65|247|rcu:RCOM_1154190|UDP-glucose:(indol-3-yl)acetate beta-D-glucosyltransferase [EC:2.4.1.121];K13493|3|3e-64|244|ath:AT5G05860|cytokinin-N-glucosyltransferase [EC:2.4.1.-];K13228|5|3e-60|231|zma:100274317|UDP-glucosyltransferase BX9 [EC:2.4.1.202]		-	GO:0016758//transferase activity, transferring hexosyl groups	-	COCehwD008554.1	CN01_U02P002870
CN01_scaffold005968P000020	CN01_scaffold005968G000020	#N/A	#N/A	At1g29880,At1g29870,AP2,BGAL6,GLYRS-1,ACMD2_12533	#N/A	Ea+	2076	complete	ISS_1	IPR033731,IPR002314,IPR000738,IPR006195,IPR002315,IPR027031,IPR036621,IPR004154	glycine--tRNA ligase, mitochondrial 1	glycyl-tRNA synthetase / glycine--tRNA ligase	LOC_Os08g42560	0.83	1	0.93	51.31	115.41	41.4333	33.28	1.16946	-0.308448	-0.624585	0.810709	0.382872	0.596819	K01880|1|0.0|1103|osa:4346171|glycyl-tRNA synthetase [EC:6.1.1.14]		GO:0043231//intracellular membrane-bounded organelle	GO:0004812//aminoacyl-tRNA ligase activity;GO:0032559	GO:0006418//tRNA aminoacylation for protein translation;GO:0010038//response to metal ion	COCehwD022080.1	CN01_U02P004740
CN01_06P007010	CN01_06G007010	#N/A	#N/A	RPP2B,RPP2A,RPP2D,LOC103712701,LOC107908706,LOC107931932	#N/A	Ea+	342	complete	ISS_2	IPR027534,IPR038716	60S acidic ribosomal protein P2B	60S acidic ribosomal protein family	LOC_Os05g37330	0.65	0.99	0.99	51.1	114.83	50.0933	62.885	1.1681	-0.0287047	0.299393	0.810557	0.0987465	0.390196	K02943|1|2e-23|105|vvi:100241445|large subunit ribosomal protein LP2		-	-	-	COCehwD027360.1	CN01_06P007010
CN01_scaffold003417P000080	CN01_scaffold003417G000080	#N/A	#N/A	PPXII,POX2,PPOX2,PPXI,LOC103702932	#N/A	Ea+	1536	complete	ISS_1	IPR036188,IPR004572,IPR002937	protoporphyrinogen oxidase, mitochondrial	Flavin containing amine oxidoreductase family	LOC_Os04g41260	0.65	0.97	0.91	47.41	113.697	55.13	50.41	1.26193	0.217646	0.0885186	0.822042	0.306099	0.172632	K00231|1|0.0|653|vvi:100254398|oxygen-dependent protoporphyrinogen oxidase [EC:1.3.3.4]		GO:0009528//plastid inner membrane	GO:0016634	GO:0006779//porphyrin-containing compound biosynthetic process	COCehwD015059.1	CN01_U01P010120
CN01_scaffold060633P000020	CN01_scaffold060633G000020	#N/A	#N/A	At1g76200,FEN1B,FEN1b,FEN1-B,CDL15_Pgr007224,PanWU01x14_151920,LOC109004288,LOC107921054	#N/A	Ea+	438	missing_functional_completeness	ISS_4	#N/A	conserved hypothetical protein	#N/A	LOC_Os05g03150	0.51	0.34	0.58	40.68	111.973	57.5567	91.74	1.46076	0.500663	1.17323	0.843066	0.527882	0.794816	-		-	-	-	COCehwD022269.1	CN01_U03P009100
CN01_01P012530	CN01_01G012530	#N/A	#N/A	TIG,TRN1,OsI_18044,PCMP-E68,LOC103713612	#N/A	Ea+	1617	complete	ISS_1	IPR036611,IPR008881,IPR037041,IPR005215,IPR027304,IPR008880	trigger factor-like protein TIG, Chloroplastic	trigger factor type chaperone family protein	LOC_Os06g20320	0.7	0.87	0.87	39.5333	111.38	60.3833	59.165	1.49435	0.611081	0.581674	0.845225	0.591941	0.584209	-		GO:0009526//plastid envelope;GO:0009532//plastid stroma	GO:0016859//cis-trans isomerase activity	GO:0006810//transport;GO:0044267//cellular protein metabolic process	COCehwD023662.1	CN01_01P012530
CN01_contig69644838P000010	CN01_contig69644838G000010	#N/A	#N/A	SCE1,UBC2,SORBI_3001G314500,LOC103702696,TRIUR3_10475,103976371	#N/A	Ea+	327	fragment	ISS_3	IPR000608,IPR016135,IPR023313	putative SUMO-conjugating enzyme SCE1	sumo conjugation enzyme 1	LOC_Os03g03130	0.87	0.96	0.86	45.9	110.07	75.9567	65.1	1.26186	0.726682	0.504163	0.821235	0.655552	0.541385	K10577|1|4e-52|200|sbi:SORBI_01g030580|ubiquitin-conjugating enzyme E2 I [EC:6.3.2.19]		-	GO:0016879//ligase activity, forming carbon-nitrogen bonds;GO:0032559	GO:0006464//cellular protein modification process	COCehwD000775.1	CN01_U03P014020
CN01_15P005070	CN01_15G005070	#N/A	#N/A	ACR4,ACR3,ACR5,ACR6,LOC103696629,MA16_Dca015861,LOC104592829,AXF42_Ash000660	#N/A	Ea+	1038	complete	ISS_2	IPR002912,IPR040217	ACT domain-containing protein ACR4	ACT domain repeat 5	LOC_Os08g42080	0.48	0.96	0.88	42.2533	109.97	44.5367	38.385	1.37997	0.0759284	-0.138523	0.833954	0.159144	0.221589	K00688|1|9e-07|52.8|gmx:100779066|starch phosphorylase [EC:2.4.1.1]		-	-	-	COCehwD026979.1	CN01_15P005070
CN01_contig69356443P000010	CN01_contig69356443G000010	#N/A	#N/A	unknown_gene	#N/A	Ea+	186	missing_functional_completeness	ISS_5	#N/A	hypothetical protein	phosphatidic acid phosphohydrolase 2	LOC_Os11g40080	0.3	0.59	0.03	46.6	109.61	57.7	94.905	1.23398	0.308241	1.02615	0.816979	0.38754	0.767845	-		-	-	-	COCehwD000380.1	COCehwD000380.1
CN01_11P002270	CN01_11G002270	#N/A	#N/A	At5g16400,TRXF,At3g02730,Os01g0913000,LOC103705696,103994134,LOC103715192,LOC104589677	#N/A	Ea+	408	complete	ISS_2	IPR013766,IPR005746,IPR017937,IPR036249	thioredoxin F-type, chloroplastic-like	thioredoxin Y1	LOC_Os01g73234	0.32	0.85	0.73	37.4067	104.23	24.0867	27.905	1.4784	-0.635061	-0.422772	0.842811	0.572877	0.456894	K03671|1|2e-44|175|gmx:100499776|thioredoxin 1		GO:0031976;GO:0009532//plastid stroma	GO:0015036//disulfide oxidoreductase activity;GO:0030234//enzyme regulator activity	GO:0051234//establishment of localization;GO:0005975//carbohydrate metabolic process;GO:0018904;GO:0019725//cellular homeostasis;GO:0044093;GO:0044092//negative regulation of molecular function;GO:0006091//generation of precursor metabolites and energy	COCehwD014724.1	CN01_11P002270
CN01_08P001490	CN01_08G001490	#N/A	#N/A	Os08g0433100,At1g25520,At1g68650,Os11g0472500,LOC103719931,103985458,103992198,AQUCO_02600245v1	#N/A	Ea+	318	fragment	ISS_3	IPR001727	putative GDT1-like protein 5	Uncharacterized protein family (UPF0016)	LOC_Os08g33630	0.85	0.95	0.43	45.6967	103.083	69.6533	82.585	1.17365	0.608103	0.853791	0.808005	0.598374	0.707311	-		GO:0031224//intrinsic to membrane	-	-	COCehwD024337.1	CN01_08P001490
CN01_scaffold011142P000010	CN01_scaffold011142G000010	ABA.12	BURP	BURP3,BURP6,BURP5,BURP2,LOC103712986,LOC103701411,LOC103708992,RD22	#N/A	Ea+	723	complete	ISS_2	IPR004873	BURP domain-containing protein 6	BURP domain-containing protein	LOC_Os01g53240	0.56	0.92	0.53	4.36667	102.947	17.7133	2.63	4.55922	2.02023	-0.73147	0.914146	0.756085	0.295974	-		-	-	-	COCehwD002168.1	CN01_U02P018060
CN01_05P003900	CN01_05G003900	#N/A	#N/A	LECRK17,SIZ1,HAK5,LOC103714921,BRADI_4g12240v3	#N/A	Ea+	207	complete	ISS_1	IPR010580	stress-associated endoplasmic reticulum protein 2-like	Ribosome associated membrane protein RAMP4	LOC_Os11g41875	0.96	0.99	0.99	34.2	102.273	74.7333	79.2	1.58036	1.12776	1.2115	0.852378	0.774776	0.795474	-		GO:0044464//cell part	-	-	COCehwD014889.1	CN01_05P003900
CN01_04P009290	CN01_04G009290	#N/A	#N/A	OTP43,SDE3,RGTA1,CYP79A2,BRADI_2g27326v3	#N/A	Ea+	327	modules	ISS_4	#N/A	conserved hypothetical protein	Calcineurin-like metallo-phosphoesterase superfamily protein	LOC_Os03g27950	0.26	0.73	0.16	45.2567	102.19	29.4867	23.16	1.17505	-0.618068	-0.966495	0.808874	0.579179	0.712234	-		-	-	-	COCehwD006763.1	CN01_04P009290
CN01_11P000810	CN01_11G000810	#N/A	#N/A	NRPD1,LES1_20t00018,LOC107821820,CISIN_1g044956mg	#N/A	Ea+	387	complete	ISS_4	#N/A	conserved hypothetical protein	#N/A	LOC_Os06g24190	0.31	0.74	0.7	40.9767	100.08	32.1567	26.995	1.28828	-0.349685	-0.60211	0.822283	0.405432	0.570494	-		-	-	-	COCehwD011178.1	CN01_11P000810
CN01_08P006760	CN01_08G006760	#N/A	#N/A	RIP2,RIP3,RIP1	#N/A	Ea+La-	1710	complete	ISS_2	IPR036041,IPR000772,IPR017989,IPR035992,IPR001574,IPR016139,IPR017988,IPR016138	Ricin	#N/A	LOC_Os12g07520	0.2	0.48	0.84	1587.42	3912.19	1393.7	323.22	1.30129	-0.187764	-2.2961	0.844411	0.301162	0.900991	-		-	GO:0005488//binding;GO:0030597	GO:0051704;GO:0006950//response to stress;GO:0006412//translation	COCehwD002532.1	CN01_08P006760
CN01_05P004220	CN01_05G004220	#N/A	#N/A	PAO,PAO1,PAO4,PAO3,LOC103713355,ACMD2_21423,VIT_01s0127g00800,BVC80_8965g27	#N/A	Ea+La-	1452	complete	ISS_1	IPR002937,IPR001613,IPR036188	polyamine oxidase	polyamine oxidase 3	LOC_Os04g57550	0.28	0.98	0.95	925.503	1946.2	849.67	390.445	1.07235	-0.123336	-1.24512	0.80973	0.223714	0.829474	K13366|1|0.0|726|vvi:100241347|polyamine oxidase (propane-1,3-diamine-forming) [EC:1.5.3.14]		GO:0031410//cytoplasmic vesicle	GO:0003824//catalytic activity	GO:0008152//metabolic process	COCehwD027713.1	CN01_05P004220
CN01_scaffold016931P000010	CN01_scaffold016931G000010	#N/A	#N/A	RIP2,RIP1,RIP3	#N/A	Ea+La-	567	fragment	ISS_3	IPR000772,IPR035992,IPR001574	putative Ricin	cytochrome P450, family 71, subfamily A, polypeptide 13	LOC_Os06g43410	0.26	0.3	0.1	390.823	1924.65	285.203	58.64	2.30001	-0.454526	-2.73656	0.903985	0.530364	0.907436	-		-	GO:0030597;GO:0030246//carbohydrate binding	GO:0051704;GO:0006950//response to stress;GO:0006412//translation	COCehwD007081.1	CN01_U03P005370
CN01_scaffold029269P000010	CN01_scaffold029269G000010	#N/A	#N/A	RIP2,RIP1,RIP3	#N/A	Ea+La-	1713	complete	ISS_2	IPR017989,IPR000772,IPR017988,IPR035992,IPR001574,IPR016138,IPR036041,IPR016139	Ricin	#N/A	LOC_Os11g06490	0.25	0.43	0.6	183.277	654.667	172.52	46.335	1.83674	-0.0872595	-1.98385	0.886107	0.186482	0.880674	-		-	GO:0030597	GO:0051704;GO:0006950//response to stress;GO:0006412//translation	COCehwD013298.1	CN01_U02P014800
CN01_contig69145767P000010	CN01_contig69145767G000010	#N/A	#N/A	CDSP32,Os05g0200100,Os03g0800700,LOC103703827,103994433,LOC104603676,TorRG33x02_103570	#N/A	Ea+La-	891	complete	ISS_2	IPR036249,IPR013766	Thioredoxin-like protein CDSP32, chloroplastic	chloroplastic drought-induced stress protein of 32 kD	LOC_Os07g29410	0.67	0.99	0.98	119.233	419.727	111.95	50.29	1.81566	-0.0909331	-1.24544	0.883582	0.184814	0.812985	K03671|1|2e-10|64.3|smo:SELMODRAFT_94818|thioredoxin 1		GO:0009526//plastid envelope;GO:0031976;GO:0009532//plastid stroma	GO:0005488//binding;GO:0015036//disulfide oxidoreductase activity	GO:0018904;GO:0006950//response to stress;GO:0019725//cellular homeostasis	COCehwD000148.1	COCehwD000148.1
CN01_05P005580	CN01_05G005580	#N/A	#N/A	SHKA,DHAPS-1,DAHPS1,LOC103707951,ACMD2_06977,ACMD2_06990	#N/A	Ea+	1617	complete	ISS_1	IPR013785,IPR002480	phospho-2-dehydro-3-deoxyheptonate aldolase 1, chloroplastic	Class-II DAHP synthetase family protein	LOC_Os03g27230	0.76	1	1	90.1233	211.707	51.2267	27.915	1.23209	-0.815006	-1.69086	0.827905	0.692874	0.854255	K01626|1|0.0|866|vvi:100258475|3-deoxy-7-phosphoheptulonate synthase [EC:2.5.1.54]		GO:0009536//plastid	GO:0016765//transferase activity, transferring alkyl or aryl (other than methyl) groups	GO:0008652//cellular amino acid biosynthetic process	COCehwD023315.1	CN01_05P005580
CN01_03P010060	CN01_03G010060	#N/A	#N/A	ARPN,UCC3,LOC103695447,LOC103700900,FSB_LOCUS54204	#N/A	Ea+	372	complete	ISS_1	IPR039391,IPR003245,IPR008972	basic blue protein	plantacyanin	LOC_Os03g50160	0.68	0.98	0.98	67.3867	159.43	27.8633	14.425	1.24239	-1.2741	-2.22389	0.825298	0.79173	0.870463	-		GO:0031410//cytoplasmic vesicle	GO:0046914//transition metal ion binding	-	COCehwD002938.1	CN01_03P010060
CN01_01P003860	CN01_01G003860	#N/A	#N/A	4CL1,4CL2,4CL3,LOC103718393	#N/A	Ea+	1623	complete	ISS_1	IPR025110,IPR020845,IPR042099,IPR000873	4-coumarate--CoA ligase 1	4-coumarate:CoA ligase 2	LOC_Os08g34790	0.71	0.99	0.99	48.5	106.113	17.3533	10.535	1.12955	-1.48277	-2.20279	0.801197	0.799232	0.85679	K01904|1|0.0|731|vvi:100254698|4-coumarate--CoA ligase [EC:6.2.1.12]		-	-	-	COCehwD013142.1	CN01_01P003860
CN01_scaffold002583P000010	CN01_scaffold002583G000010	PSI	#N/A	PSAE,PSAE-1,PSAE2,PSAEB,103982765,LOC104602119,103973667	#N/A	Ea+La-	507	complete	ISS_2	IPR008990,IPR003375	photosystem I reaction center subunit IV A, chloroplastic-like	photosystem I subunit E-2	LOC_Os07g25430	0.62	0.3	0.32	618.517	1689.3	151.533	404.51	1.44954	-2.02918	-0.612637	0.859103	0.885471	0.640092	K02693|1|6e-13|71.6|vvi:100256684|photosystem I subunit IV		GO:0034357;GO:0043231//intracellular membrane-bounded organelle	-	-	COCehwD012162.1	CN01_U02P014230
CN01_06P017770	CN01_06G017770	#N/A	#N/A	MEE14,rpoC2,Os11g0230700,At1g77260,LOC103709159,LOC104601965,yme2_2	#N/A	Ea+La-	312	fragment	ISS_3	IPR037502	putative CCG-binding protein 1	maternal effect embryo arrest 14	LOC_Os03g55670	0.41	0.88	0.42	153.673	861.813	61.48	107.81	2.48751	-1.32168	-0.511376	0.907351	0.819716	0.574051	-		-	-	-	COCehwD003737.1	CN01_06P017770
CN01_scaffold011970P000010	CN01_scaffold011970G000010	#N/A	#N/A	UTR2,UTR4,STP5,MYB20,LOC103720881,Ccrd_006823,LOC104612689	#N/A	Ea+	417	fragment	ISS_3	IPR013657	putative UDP-galactose/UDP-glucose transporter 2	UDP-galactose transporter 2	LOC_Os03g02670	0.73	0.97	0.33	66.44	181.523	13.68	15.47	1.45003	-2.27998	-2.10258	0.849963	0.868041	0.867053	K15277|1|4e-53|204|vvi:100242001|solute carrier family 35 (adenosine 3'-phospho 5'-phosphosulfate transporter), member B3		-	-	-	COCehwD003050.2	CN01_U03P004130
CN01_scaffold015454P000020	CN01_scaffold015454G000020	#N/A	#N/A	ATJ72,ATJ6,DNAJ1,JJJ1,LOC103703349,LOC103707924	#N/A	Ea+	492	complete	ISS_2	IPR001623,IPR018253,IPR036869	chaperone protein DnaJ-like	Chaperone DnaJ-domain superfamily protein	LOC_Os03g18870	0.68	0.93	0.86	53.3933	159.617	14.4567	17.13	1.57988	-1.88492	-1.64013	0.860406	0.839435	0.829579	K09510|1|4e-13|72.0|zma:100382308|DnaJ homolog subfamily B member 4;K09506|5|7e-13|71.2|smo:SELMODRAFT_110523|DnaJ homolog subfamily A member 5		-	GO:0005515//protein binding	GO:0044267//cellular protein metabolic process	COCehwD006165.2	CN01_U02P006420
CN01_contig69612081P000010	CN01_contig69612081G000010	#N/A	#N/A	NOP5-1,NOP5-2,NOP5-3,PRP31,LOC103711731,103993390,LOC103713994	#N/A	Ea+	1668	complete	ISS_3	IPR002687,IPR012976,IPR029012,IPR012974,IPR036070	putative nucleolar protein 5-2	NOP56-like pre RNA processing ribonucleoprotein	LOC_Os03g22740	0.74	0.94	0.89	38.4467	100.453	8.89	10.135	1.3856	-2.1126	-1.92351	0.833002	0.836091	0.828421	K14565|1|0.0|685|vvi:100248675|nucleolar protein 58		-	-	-	COCehwD000741.1	CN01_U03P014990
CN01_scaffold035709P000030	CN01_scaffold035709G000030	PSI	#N/A	PSAH,PSAH2,LOC103709474,LOC103706861,LOC104595173,LOC104592175	#N/A	La+	441	complete	ISS_1	IPR004928	photosystem I reaction center subunit VI, chloroplastic	photosystem I subunit H2	LOC_Os05g48630	0.76	0.96	0.98	2635.69	4613.46	6946.26	5826.95	0.807666	1.39805	1.14456	0.739457	0.841359	0.814894	K02695|1|9e-45|176|vvi:100241224|photosystem I subunit VI		GO:0034357;GO:0044425//membrane part;GO:0009536//plastid	-	-	COCehwD015607.1	CN01_U02P016190
CN01_15P002290	CN01_15G002290	#N/A	#N/A	ALDP,FBA2,FBA1,LOC103703210,LOC103701278,ACMD2_06096,103994827	#N/A	La+	1167	complete	ISS_1	IPR029768,IPR000741,IPR013785	fructose-bisphosphate aldolase, chloroplastic	fructose-bisphosphate aldolase 2	LOC_Os11g07020	0.89	1	1	2574.11	3031.82	8529.37	7873.35	0.236107	1.72836	1.6129	0.377775	0.872682	0.868711	K01623|1|0.0|696|osa:4349897|fructose-bisphosphate aldolase, class I [EC:4.1.2.13]		-	-	-	COCehwD001759.1	CN01_15P002290
CN01_04P001440	CN01_04G001440	PS	#N/A	RCA2,RCA1,RCA,LOC103704142,103972300,LOC103715669	#N/A	La+	1488	complete	ISS_2	IPR003959,IPR027417	Ribulose bisphosphate carboxylase/oxygenase activase 2, chloroplastic	rubisco activase	LOC_Os11g47970	0.85	0.83	0.89	2181.26	2099.74	9800.19	8688.27	-0.0549533	2.16765	1.99391	0.133041	0.892732	0.890843	K03064|1|5e-07|54.3|smo:SELMODRAFT_157152|26S proteasome regulatory subunit T4		GO:0009532//plastid stroma	GO:0001071//nucleic acid binding transcription factor activity;GO:0032559	-	COCehwD004627.1	CN01_04P001440
CN01_14P002700	CN01_14G002700	#N/A	MT	MT3A,mt3-A,MET	62	La+	198	complete	ISS_2	#N/A	Metallothionein-like protein type 3	metallothionein 3	LOC_Os01g10400	0.61	0.94	0.92	1132	1533.19	4417.91	5093.8	0.437655	1.96449	2.16986	0.557091	0.883892	0.897737	-		-	-	-	COCehwD017694.1	CN01_14P002700
CN01_05P004380	CN01_05G004380	PSII	#N/A	PSBT,TUFA,LOC103707713,CFP56_73917,CFP56_25476,FSB_LOCUS29141	#N/A	La+	342	complete	ISS_1	IPR040296	photosystem II 5 kDa protein, chloroplastic	P-loop containing nucleoside triphosphate hydrolases superfamily protein	LOC_Os01g65350	0.28	0.64	0.19	1271.09	1502.01	3320.27	2925.18	0.240825	1.38523	1.20246	0.37754	0.839932	0.823237	-		-	-	-	COCehwD007899.1	CN01_05P004380
CN01_07P002130	CN01_07G002130	#N/A	#N/A	PETH,LOC103706150,B456_009G194200,LOC107958222,CCACVL1_26024	#N/A	La+	1101	complete	ISS_1	IPR017927,IPR035442,IPR001433,IPR017938,IPR039261,IPR015701,IPR001709	ferredoxin--NADP reductase, leaf isozyme, chloroplastic	root FNR 1	LOC_Os07g05400	0.45	1	1	954.74	1392.61	2424.22	2203.95	0.544615	1.34434	1.20691	0.62277	0.835202	0.824124	K02641|1|0.0|632|gmx:100802032|ferredoxin--NADP+ reductase [EC:1.18.1.2]		GO:0034357;GO:0009532//plastid stroma;GO:0009534//chloroplast thylakoid	GO:0008937//ferredoxin-NAD(P) reductase activity;GO:0050662//coenzyme binding;GO:0000166//nucleotide binding	GO:0051234//establishment of localization;GO:0006091//generation of precursor metabolites and energy	COCehwD020190.1	CN01_07P002130
CN01_scaffold065881P000010	CN01_scaffold065881G000010	PSII	#N/A	PSBY,MTM1,SEC5A,LOC103712192,103996005,LOC107916725,CFP56_05594	#N/A	La+	930	modules	ISS_3	IPR009388,IPR029068,IPR038760	putative Photosystem II core complex proteins psbY, chloroplastic	photosystem II BY	LOC_Os08g02630	0.61	0.41	0.66	1027.9	1077.83	3508.79	2921.86	0.0684342	1.77128	1.50718	0.162921	0.874261	0.85826	K02723|1|4e-29|126|pop:POPTR_726168|photosystem II PsbY protein		-	-	-	COCehwD023139.1	CN01_U03P007060
CN01_05P007660	CN01_05G007660	PS	#N/A	PNSB4,ycf78,PUB51,JAL17,LOC103702836,LOC104597911,CDL12_27723	#N/A	La+	252	fragment	ISS_3	IPR034570	putative Photosynthetic NDH subunit of subcomplex B 4, chloroplastic	NDH dependent flow 6	LOC_Os02g51020	0.72	0.98	0.45	665.33	1050.08	2078.61	1932.1	0.658362	1.64348	1.53802	0.685159	0.86476	0.860336	-		-	-	-	COCehwD015829.1	CN01_05P007660
CN01_11P001610	CN01_11G001610	#N/A	#N/A	ATPG,IAN10,KIN14I,LOC103712135,ACMD2_12172,ZOSMA_223G00200	#N/A	La+	699	complete	ISS_1	IPR002146,IPR034679	ATP synthase subunit b', chloroplastic	ATPase, F0 complex, subunit B/B\', bacterial/chloroplast	LOC_Os03g17070	0.81	0.63	0.69	719.377	974.547	1871.68	1532.32	0.437984	1.37951	1.09089	0.556636	0.838318	0.806623	K02109|1|3e-46|182|zma:100282566|F-type H+-transporting ATPase subunit b [EC:3.6.3.14]		GO:0043231//intracellular membrane-bounded organelle;GO:0044425//membrane part	-	GO:0006810//transport	COCehwD017857.1	CN01_11P001610
CN01_14P004980	CN01_14G004980	#N/A	#N/A	LOC103715836,LOC103719435	#N/A	La+	495	complete	ISS_1	IPR015892,IPR036874,IPR001765	Carbonic anhydrase	carbonic anhydrase 2	LOC_Os01g45274	0.68	0.99	0.81	487.877	894.233	1888.18	1705.29	0.874135	1.95241	1.80543	0.757805	0.883217	0.881946	K01673|1|2e-69|258|vvi:100852632|carbonic anhydrase [EC:4.2.1.1]		GO:0009532//plastid stroma	GO:0046914//transition metal ion binding;GO:0016836//hydro-lyase activity	-	COCehwD007976.1	CN01_14P004980
CN01_scaffold001675P000020	CN01_scaffold001675G000020	#N/A	#N/A	CSP41B,CSP41A,UGE4,UGE-3,LOC103697482,ACMD2_01190,LOC104607071	#N/A	La+	366	fragment	ISS_3	IPR036291	putative Chloroplast stem-loop binding protein of 41 kDa b, chloroplastic	chloroplast RNA binding	LOC_Os12g23180	0.82	0.97	0.31	621.647	845.393	1643.87	1685.12	0.443528	1.40293	1.43868	0.556429	0.840759	0.850845	-		GO:0043231//intracellular membrane-bounded organelle	GO:0048037//cofactor binding	GO:0008152//metabolic process	COCehwD006999.1	CN01_U01P003360
CN01_06P019290	CN01_06G019290	#N/A	#N/A	Os12g0632700,MDHG,LOC103705350,CCACVL1_16220	#N/A	La+	1071	complete	ISS_1	IPR015955,IPR001252,IPR001557,IPR010097,IPR022383,IPR036291,IPR001236	malate dehydrogenase, glyoxysomal	peroxisomal NAD-malate dehydrogenase 2	LOC_Os12g43630	0.88	1	1	591.303	813.49	1511.45	1441.97	0.460226	1.35397	1.28607	0.571328	0.835553	0.834282	K00026|1|1e-172|603|osa:4352871|malate dehydrogenase [EC:1.1.1.37]		GO:0005777//peroxisome	GO:0016615//malate dehydrogenase activity	GO:0009060//aerobic respiration;GO:0044262//cellular carbohydrate metabolic process;GO:0043648//dicarboxylic acid metabolic process	COCehwD002249.1	CN01_06P019290
CN01_16P002370	CN01_16G002370	#N/A	#N/A	AGT1,LOC103723389,LOC104611993,BVC80_8189g6	#N/A	La+	1470	modules	ISS_3	IPR015424,IPR015422,IPR020578,IPR015421,IPR000192	putative Serine--glyoxylate aminotransferase	alanine:glyoxylate aminotransferase	LOC_Os08g39300	0.84	0.69	0.86	637.997	729.383	1534.38	1552.74	0.193128	1.26604	1.2832	0.322401	0.825825	0.832749	K00830|1|6e-176|615|rcu:RCOM_0063050|alanine-glyoxylate transaminase / serine-glyoxylate transaminase / serine-pyruvate transaminase [EC:2.6.1.44 2.6.1.45 2.6.1.51]		-	GO:0048037//cofactor binding;GO:0008483//transaminase activity	-	COCehwD019599.2	CN01_16P002370
CN01_scaffold005885P000020	CN01_scaffold005885G000020	#N/A	#N/A	GLO1,GLO5,LOC103705751,103990342,CDL15_Pgr019114,HannXRQ_Chr13g0389801	#N/A	La+	1104	complete	ISS_1	IPR013785,IPR012133,IPR008259,IPR000262,IPR037396	Peroxisomal (S)-2-hydroxy-acid oxidase GLO5	Aldolase-type TIM barrel family protein	LOC_Os03g57220	0.88	0.99	0.99	537.053	651.743	1341.97	1207.27	0.279239	1.32121	1.16861	0.417546	0.831858	0.818398	K11517|1|0.0|645|rcu:RCOM_0631490|(S)-2-hydroxy-acid oxidase [EC:1.1.3.15]		-	GO:0016899//oxidoreductase activity, acting on the CH-OH group of donors, oxygen as acceptor;GO:0000166//nucleotide binding	GO:0008152//metabolic process	COCehwD021921.2	CN01_U02P010900
CN01_scaffold001675P000030	CN01_scaffold001675G000030	#N/A	#N/A	CSP41B,CSP41A,At1g75280,UGE1,LOC103697482,LOC104607071,JCGZ_23195	#N/A	La+	774	fragment	ISS_3	IPR036291	putative Chloroplast stem-loop binding protein of 41 kDa b, chloroplastic	chloroplast RNA binding	LOC_Os12g23180	0.84	0.84	0.58	521.563	632.42	1212.31	1107.79	0.278041	1.21684	1.08677	0.41747	0.818234	0.806279	K00224|1|5e-06|49.7|ath:AT1G75280|[EC:1.3.1.-]		GO:0009526//plastid envelope;GO:0042579//microbody;GO:0009570//chloroplast stroma;GO:0030529//ribonucleoprotein complex;GO:0005576//extracellular region	GO:0048037//cofactor binding	GO:0006952//defense response;GO:0048511//rhythmic process;GO:0042254//ribosome biogenesis;GO:0009657//plastid organization;GO:0008152//metabolic process	COCehwD007000.1	CN01_U01P003370
CN01_scaffold000728P000020	CN01_scaffold000728G000020	#N/A	#N/A	GGAT2,GGAT1,ALAAT2,LOC103707141,103994683,103989410,LOC104593113	#N/A	La+	1446	complete	ISS_1	IPR015422,IPR004839,IPR015424,IPR015421	glutamate--glyoxylate aminotransferase 2	alanine-2-oxoglutarate aminotransferase 2	LOC_Os07g01760	0.9	0.99	0.98	459.59	543.62	1441.82	1173.61	0.242251	1.64948	1.35253	0.376402	0.865222	0.841469	K14272|1|0.0|889|vvi:100261274|glutamate--glyoxylate aminotransferase [EC:2.6.1.4 2.6.1.2 2.6.1.44 2.6.1.-]		GO:0009532//plastid stroma;GO:0042579//microbody	GO:0048037//cofactor binding;GO:0016846//carbon-sulfur lyase activity;GO:0047635	GO:0008652//cellular amino acid biosynthetic process;GO:0043094	COCehwD024370.1	CN01_U01P014500
CN01_10P002110	CN01_10G002110	#N/A	#N/A	At1g32060,LOC103720990,LOC103706299,LOC104611432,LOC104600397	#N/A	La+	1230	complete	ISS_1	IPR006082,IPR027417,IPR006083	phosphoribulokinase, chloroplastic	phosphoribulokinase	LOC_Os02g47020	0.85	1	1	660.94	542.98	1492.95	1451.11	-0.28362	1.17557	1.13456	0.417567	0.81318	0.812547	K00855|1|0.0|696|pop:POPTR_712554|phosphoribulokinase [EC:2.7.1.19]		GO:0009536//plastid	GO:0016301//kinase activity;GO:0032559	GO:0015977//carbon fixation;GO:0006796//phosphate-containing compound metabolic process;GO:0044238//primary metabolic process	COCehwD010439.1	CN01_10P002110
CN01_06P007250	CN01_06G007250	#N/A	#N/A	103989227,103997140,LOC103715836	#N/A	La+	798	complete	ISS_1	IPR015892,IPR036874,IPR001765	carbonic anhydrase 2	carbonic anhydrase 2	LOC_Os01g45274	0.64	0.85	0.82	607.157	510.733	5366.1	4215.7	-0.249499	3.14373	2.79563	0.387748	0.910713	0.911202	K01673|1|1e-85|314|rcu:RCOM_1095240|carbonic anhydrase [EC:4.2.1.1]		GO:0009532//plastid stroma	GO:0046914//transition metal ion binding;GO:0016836//hydro-lyase activity	-	COCehwD005322.1	CN01_06P007250
CN01_02P010410	CN01_02G010410	#N/A	#N/A	ALDP,FBA2,FBA1,LOC103703210,LOC103701278,ACMD2_06096,CICLE_v10028594mg	#N/A	La+	1080	complete	ISS_1	IPR013785,IPR029768,IPR000741	Fructose-bisphosphate aldolase, chloroplastic	fructose-bisphosphate aldolase 2	LOC_Os11g07020	0.9	1	0.92	287.9	488.507	1058.81	804.945	0.76281	1.8788	1.48332	0.720978	0.877901	0.852441	K01623|1|0.0|674|pop:POPTR_833033|fructose-bisphosphate aldolase, class I [EC:4.1.2.13]		-	-	-	COCehwD007281.1	CN01_02P010410
CN01_scaffold017495P000030	CN01_scaffold017495G000030	ABA.12	BURP	BURP3,BURP6,BURP5,BURP17,RD22,LOC103701411,LOC103699936,LOC103708992	11	La+	960	modules	ISS_3	IPR004873	putative BURP domain-containing protein 6	BURP domain-containing protein	LOC_Os11g06980	0.51	0.71	0.4	255.97	478.133	1349.72	1226.1	0.901438	2.39861	2.26003	0.763274	0.899047	0.89975	-		-	-	-	COCehwD007447.1	CN01_U03P005250
CN01_scaffold029432P000010	CN01_scaffold029432G000010	#N/A	#N/A	TPS4,EBOS,ISPS,ACMD2_14367,ACMD2_14368,CCACVL1_00151,PHAVU_011G1068001g	#N/A	La+	306	fragment	ISS_3	IPR008949	putative Tricyclene synthase EBOS, chloroplastic	Terpenoid cyclases/Protein prenyltransferases superfamily protein	LOC_Os03g24640	0.27	0.82	0.14	715.85	427.547	4462.84	5428.49	-0.743575	2.64023	2.92282	0.715288	0.904329	0.912776	K12742|1|2e-12|68.6|pop:POPTR_1111628|isoprene synthase [EC:4.2.3.27];K07385|2|5e-09|57.4|aly:ARALYDRAFT_664366|1,8-cineole synthase [EC:4.2.3.-];K12467|3|7e-09|57.0|ath:AT3G25810|myrcene/ocimene synthase [EC:4.2.3.15]		-	-	-	COCehwD013422.1	CN01_U03P006990
CN01_contig68485390P000010	CN01_contig68485390G000010	#N/A	#N/A	TPS4,EBOS,ISPS,ACMD2_14367,ACMD2_14368,CCACVL1_00151,PHAVU_011G1068001g	#N/A	La+	306	fragment	ISS_3	IPR008949	putative Tricyclene synthase EBOS, chloroplastic	Terpenoid cyclases/Protein prenyltransferases superfamily protein	LOC_Os03g24640	0.27	0.82	0.14	715.85	427.547	4462.84	5428.49	-0.743575	2.64023	2.92282	0.715288	0.904329	0.912776	K12742|1|2e-12|68.6|pop:POPTR_1111628|isoprene synthase [EC:4.2.3.27];K07385|2|5e-09|57.4|aly:ARALYDRAFT_664366|1,8-cineole synthase [EC:4.2.3.-];K12467|3|7e-09|57.0|ath:AT3G25810|myrcene/ocimene synthase [EC:4.2.3.15]		-	-	-	COCehwD000012.1	COCehwD000012.1
CN01_16P001820	CN01_16G001820	#N/A	#N/A	RPL1,RPL10A,LOC103701665,103993418,103970521,CFOL_v3_18878	#N/A	La+	1077	complete	ISS_1	IPR028364,IPR005878,IPR023673,IPR023674,IPR016095	50S ribosomal protein L1, chloroplastic	Ribosomal protein L1p/L10e family	LOC_Os05g32220	0.81	0.7	0.7	395.093	413.197	908.387	916.895	0.0646351	1.20111	1.21456	0.145898	0.8148	0.823154	K02863|1|4e-68|256|olu:OSTLU_12802|large subunit ribosomal protein L1		-	-	-	COCehwD017757.1	CN01_16P001820
CN01_04P000520	CN01_04G000520	#N/A	#N/A	rps3,DHN3,PHYPADRAFT_128349,LOC103704050,MA16_Dca022224,Retsat_1,L484_022051	#N/A	La+	291	complete	ISS_4	IPR021584,IPR037244	conserved hypothetical protein	#N/A	LOC_Os07g13969	0.48	0.61	0.5	397.783	398.11	1393.08	1156.96	0.00118428	1.80823	1.54028	0.0616921	0.875626	0.859877	-		-	-	-	COCehwD004535.1	CN01_04P000520
CN01_07P014110	CN01_07G014110	#N/A	#N/A	SHM1,LOC103721738,LOC104595554,LOC104588452	#N/A	La+	1557	complete	ISS_1	IPR019798,IPR015421,IPR001085,IPR015424,IPR015422,IPR039429	serine hydroxymethyltransferase, mitochondrial	serine transhydroxymethyltransferase 1	LOC_Os03g52840	0.87	1	1	261.06	335.373	860.843	736.77	0.361387	1.72137	1.49683	0.490274	0.870372	0.853828	K00600|1|0.0|895|pop:POPTR_421205|glycine hydroxymethyltransferase [EC:2.1.2.1]		GO:0043231//intracellular membrane-bounded organelle	GO:0016742//hydroxymethyl-, formyl- and related transferase activity;GO:0048037//cofactor binding	GO:0009069//serine family amino acid metabolic process;GO:0006730//one-carbon metabolic process	COCehwD012783.1	CN01_07P014110
CN01_scaffold006534P000090	CN01_scaffold006534G000090	#N/A	#N/A	Os01g0895100,IM30,VIPP1,OsI_22356,LOC103714722,Os01g0895100_2,AMTR_s00066p00198600	#N/A	La+	771	complete	ISS_2	IPR007157	membrane-associated 30 kDa protein, chloroplastic	plastid transcriptionally active 4	LOC_Os01g67000	0.69	0.99	0.67	178.733	321.32	419.027	409.22	0.846202	1.22923	1.19507	0.747065	0.816876	0.819524	K03969|1|1e-87|320|vvi:100249595|phage shock protein A		GO:0009528//plastid inner membrane;GO:0044434;GO:0009579//thylakoid	-	-	COCehwD023032.1	CN01_U01P014150
CN01_scaffold001941P000020	CN01_scaffold001941G000020	#N/A	#N/A	ISPH,EMB1270,NAC017,LOC103713886,LOC103707496,103993826,ACMD2_16755	#N/A	La+	1374	complete	ISS_1	IPR003451	4-hydroxy-3-methylbut-2-enyl diphosphate reductase, chloroplastic	4-hydroxy-3-methylbut-2-enyl diphosphate reductase	LOC_Os03g52170	0.78	0.95	0.95	262.207	310.61	652.717	648.745	0.2444	1.31575	1.30695	0.374684	0.830424	0.83519	K03527|1|0.0|709|zma:100383164|4-hydroxy-3-methylbut-2-enyl diphosphate reductase [EC:1.17.1.2]		GO:0043231//intracellular membrane-bounded organelle	GO:0016726//oxidoreductase activity, acting on CH or CH2 groups, NAD or NADP as acceptor	GO:0006090//pyruvate metabolic process;GO:0006721//terpenoid metabolic process	COCehwD008483.1	CN01_U02P008790
CN01_scaffold009902P000020	CN01_scaffold009902G000020	#N/A	#N/A	At1g67280,GLX1,DWA2,LOC103718655,103969387,LOC104214458,LOC107832338	#N/A	La+	525	complete	ISS_4	IPR037523,IPR004360,IPR029068	conserved hypothetical protein	Lactoylglutathione lyase / glyoxalase I family protein	LOC_Os07g06660	0.64	0.83	0.74	146.913	301.023	556.307	441.34	1.03491	1.92092	1.58693	0.795928	0.879687	0.863903	K08234|1|4e-50|195|ath:AT5G57040|glyoxylase I family protein		GO:0009536//plastid	-	-	COCehwD027950.1	CN01_U03P000020
CN01_scaffold009444P000020	CN01_scaffold009444G000020	#N/A	#N/A	TSJT1,Os06g0265000,ASN2,ASN3,LOC103708007,103993501,LOC101775479	#N/A	La+	711	complete	ISS_1	IPR029055,IPR024286	stem-specific protein TSJT1	Aluminium induced protein with YGL and LRDR motifs	LOC_Os12g05050	0.82	1	1	272.133	286.487	628.87	665.98	0.0741543	1.20845	1.29117	0.162107	0.815359	0.832968	K01953|1|7e-10|62.4|ppp:PHYPADRAFT_173106|asparagine synthase (glutamine-hydrolysing) [EC:6.3.5.4]		GO:0016020//membrane	-	GO:0009725//response to hormone stimulus;GO:0010038//response to metal ion	COCehwD027579.1	CN01_U01P014520
CN01_scaffold021932P000010	CN01_scaffold021932G000010	#N/A	#N/A	At5g16400,Os01g0913000,TRXF,At3g02730,LOC103705696,LOC104589677,103994134,AXF42_Ash006543	#N/A	La+	537	complete	ISS_2	IPR017937,IPR013766,IPR036249	Thioredoxin F2, chloroplastic	thioredoxin F2	LOC_Os01g68480	0.61	0.99	0.99	142.47	248.09	373.217	304.585	0.800205	1.38936	1.09619	0.728648	0.835533	0.803264	K03671|1|4e-50|195|gmx:100499776|thioredoxin 1		-	-	-	COCehwD010023.1	CN01_U03P003930
CN01_03P011030	CN01_03G011030	#N/A	#N/A	TPT,LOC103702469,103977049,LOC104599476,TCM_029804	#N/A	La+	1245	complete	ISS_1	IPR004696,IPR004853	triose phosphate/phosphate translocator, chloroplastic	Glucose-6-phosphate/phosphate translocator-related	LOC_Os01g13770	0.75	0.99	0.99	146.61	229.36	524.483	424.7	0.64563	1.83891	1.53446	0.671923	0.874819	0.85655	K15283|1|8e-173|604|rcu:RCOM_1673220|solute carrier family 35, member E1		-	-	-	COCehwD024053.1	CN01_03P011030
CN01_02P016960	CN01_02G016960	#N/A	#N/A	OsI_19898,Os05g0401100,At1g54780,RLP51,KK1_007074,LOC103712339,MA16_Dca011691,OsJ_18480	#N/A	La+	327	missing_functional_completeness	ISS_4	#N/A	conserved hypothetical protein	thylakoid lumen 18.3 kDa protein	LOC_Os05g33280	0.9	0.77	0.23	122.577	191.467	331.297	355.55	0.643409	1.43444	1.53637	0.665356	0.838994	0.85631	-		GO:0044436;GO:0009534//chloroplast thylakoid	-	GO:0009765//photosynthesis, light harvesting	COCehwD023920.1	CN01_02P016960
CN01_02P016970	CN01_02G016970	#N/A	#N/A	OsI_19898,Os05g0401100,At1g54780,RLP51,KK1_007074,LOC103712339,MA16_Dca011691,OsJ_18480	#N/A	La+	327	missing_functional_completeness	ISS_4	#N/A	conserved hypothetical protein	thylakoid lumen 18.3 kDa protein	LOC_Os05g33280	0.9	0.77	0.23	122.577	191.467	331.297	355.55	0.643409	1.43444	1.53637	0.665356	0.838994	0.85631	-		GO:0044436;GO:0009534//chloroplast thylakoid	-	GO:0009765//photosynthesis, light harvesting	COCehwD023921.1	CN01_02P016970
CN01_scaffold001677P000050	CN01_scaffold001677G000050	#N/A	#N/A	At1g56190,PGK1,LOC103718792,LOC103704546,103986552,103982121	#N/A	La+	1521	complete	ISS_1	IPR015824,IPR036043,IPR001576,IPR015911	phosphoglycerate kinase, cytosolic	Phosphoglycerate kinase family protein	LOC_Os05g41640	0.84	0.89	0.89	135.91	180.157	396.107	319.09	0.4066	1.54324	1.23131	0.524873	0.85186	0.821579	K00927|1|0.0|703|rcu:RCOM_1574580|phosphoglycerate kinase [EC:2.7.2.3]		GO:0009532//plastid stroma	GO:0016301//kinase activity;GO:0032559	GO:0006007//glucose catabolic process;GO:0010038//response to metal ion;GO:0006796//phosphate-containing compound metabolic process;GO:0015977//carbon fixation	COCehwD007013.1	CN01_U01P010660
CN01_07P000400	CN01_07G000400	#N/A	#N/A	unknown_gene	#N/A	La+	330	missing_functional_completeness	ISS_5	#N/A	hypothetical protein	#N/A	LOC_Os02g31830	0.41	0.41	0.08	213.733	177.127	568.303	616.66	-0.27103	1.41085	1.52866	0.403447	0.83978	0.857854	-		-	-	-	COCehwD016536.2	CN01_07P000400
CN01_14P012150	CN01_14G012150	#N/A	#N/A	SVR3,OSTLU_15891,MICPUCDRAFT_51778,POPTRDRAFT_815670,LOC103704562	#N/A	La+	2025	complete	ISS_1	IPR000640,IPR035647,IPR042116,IPR035651,IPR000795,IPR031157,IPR006298,IPR027417,IPR005225,IPR009000,IPR004161	GTP-binding protein TypA/BipA	elongation factor family protein	LOC_Os02g18450	0.86	0.89	0.9	212.943	176.82	469.607	462.175	-0.268188	1.14098	1.11797	0.403337	0.804644	0.808573	K06207|1|0.0|1085|vvi:100264026|GTP-binding protein		GO:0043231//intracellular membrane-bounded organelle	GO:0017111//nucleoside-triphosphatase activity;GO:0008135//translation factor activity, nucleic acid binding;GO:0032561//guanyl ribonucleotide binding	GO:0006412//translation;GO:0009207	COCehwD004717.1	CN01_14P012150
CN01_scaffold022899P000010	CN01_scaffold022899G000010	#N/A	#N/A	CYP76B6,CYP75B1,CYP76B10,CYP93A1,ACMD2_10245,CYP75A6,CYP7,FSB_LOCUS13565	#N/A	La+	1509	complete	ISS_1	IPR036396,IPR017972,IPR001128,IPR002401	geraniol 8-hydroxylase	cytochrome P450, family 706, subfamily A, polypeptide 4	LOC_Os01g50490	0.61	0.98	0.98	170.263	172.5	439.677	554.165	0.0188286	1.36868	1.70255	0.0892687	0.834195	0.874541	K00517|1|1e-91|335|osa:4348172|[EC:1.14.-.-];K05280|2|2e-90|331|sbi:SORBI_04g024730|flavonoid 3'-monooxygenase [EC:1.14.13.21];K13083|5|2e-89|328|gmx:547705|cytochrome P450, family 75, subfamily A (flavonoid 3',5'-hydroxylase) [EC:1.14.13.88]		-	GO:0016709//oxidoreductase activity, acting on paired donors, with incorporation or reduction of molecular oxygen, NAD(P)H as one donor, and incorporation of one atom of oxygen;GO:0005506//iron ion binding	GO:0008152//metabolic process	COCehwD010733.1	CN01_U03P011310
CN01_03P006080	CN01_03G006080	#N/A	#N/A	ABCF5,ABCF2,ABCF1,ABCF3,LOC103722707,LOC104600004,VIT_07s0031g01640,ACMD2_18665	#N/A	La+	2139	complete	ISS_1	IPR027417,IPR017871,IPR003439,IPR003593,IPR032781	ABC transporter F family member 2	general control non-repressible 5	LOC_Os11g39020	0.82	0.84	0.87	221.483	167.233	554.89	534.945	-0.405336	1.325	1.27219	0.527142	0.831561	0.829954	K06185|1|2e-57|222|cre:CHLREDRAFT_132213|ATP-binding cassette, subfamily F, member 2		GO:0043231//intracellular membrane-bounded organelle	GO:0017111//nucleoside-triphosphatase activity;GO:0000166//nucleotide binding	-	COCehwD002184.1	CN01_03P006080
CN01_06P007710	CN01_06G007710	#N/A	#N/A	CHUP1,At4g04980,Sb04g028260,KIN7M,LOC103722274,CHUP1_9,CCACVL1_07479,VIT_01s0011g02860	#N/A	La+	2955	complete	ISS_2	IPR040265	Protein CHUP1, chloroplastic	Hydroxyproline-rich glycoprotein family protein	LOC_Os12g01449	0.66	0.97	0.94	232.033	157.043	858.817	768.095	-0.563169	1.88802	1.72695	0.627143	0.878011	0.87695	-		GO:0009527//plastid outer membrane	-	GO:0009658//chloroplast organization	COCehwD026285.1	CN01_06P007710
CN01_16P004660	CN01_16G004660	#N/A	#N/A	SOQ1,LOV1,LOC103720659	#N/A	La+	789	fragment	ISS_3	IPR011042	putative Protein SUPPRESSOR OF QUENCHING 1, chloroplastic	haloacid dehalogenase-like hydrolase family protein	LOC_Os03g19760	0.59	0.98	0.21	72.21	144.503	239.423	173.685	1.00083	1.72929	1.2662	0.779939	0.865484	0.821318	-		GO:0009532//plastid stroma	GO:0003824//catalytic activity	-	COCehwD004475.1	CN01_16P004660
CN01_12P006370	CN01_12G006370	#N/A	#N/A	TPL,TPR1,TS1,LOC103708882,ACMD2_10988,VITISV_043600,103973789	#N/A	La+	528	complete	ISS_4	IPR008013	conserved hypothetical protein	#N/A	LOC_Os01g60830	0.68	0.99	0.98	265.447	140.607	777.19	795.27	-0.916757	1.54985	1.58302	0.765454	0.854769	0.864456	-		GO:0043231//intracellular membrane-bounded organelle	GO:0046914//transition metal ion binding;GO:0003676//nucleic acid binding	-	COCehwD020079.1	CN01_12P006370
CN01_01P000320	CN01_01G000320	SOS	SOS2,SnRK3.11,CIPK24	CIPK1,CIPK21,CIPK17,LOC103718157,LOC103707696,BVC80_1543g80	41	La+	1290	complete	ISS_1	IPR004041,IPR011009,IPR018451,IPR001245,IPR000719,IPR017441	CBL-interacting protein kinase 1	CBL-interacting protein kinase 1	LOC_Os05g04550	0.6	0.96	0.96	141.143	137.543	345.56	447.37	-0.0372748	1.29178	1.66431	0.117956	0.823529	0.871297	K00924|1|1e-107|388|osa:4342410|[EC:2.7.1.-];K07198|4|7e-63|239|zma:100192108|5'-AMP-activated protein kinase, catalytic alpha subunit [EC:2.7.11.11]		GO:0043231//intracellular membrane-bounded organelle	GO:0004674//protein serine/threonine kinase activity;GO:0032559	GO:0006464//cellular protein modification process;GO:0023052//signaling	COCehwD006993.1	CN01_01P000320
CN01_06P018630	CN01_06G018630	#N/A	#N/A	ADF11,ADF6,ADF2,LOC103709840,LOC103705418,ACMD2_13303	#N/A	La+	399	complete	ISS_1	IPR002108,IPR029006,IPR017904	actin-depolymerizing factor	actin depolymerizing factor 6	LOC_Os12g43340	0.83	0.99	0.9	104.353	134.377	256.13	258.715	0.364806	1.2954	1.30989	0.481211	0.82246	0.830236	K05765|1|2e-67|251|vvi:100242532|cofilin		GO:0044464//cell part	GO:0008092//cytoskeletal protein binding	-	COCehwD002798.1	CN01_06P018630
CN01_11P002240	CN01_11G002240	#N/A	#N/A	CAMTA3,ABCG12,NDB4,Os06g0628500,LOC103715186	#N/A	La+	927	modules	ISS_3	IPR018790	putative AT1G65230-like protein	Uncharacterized conserved protein (DUF2358)	LOC_Os01g68450	0.71	0.84	0.85	83.0667	132.323	214.347	208.545	0.671726	1.3676	1.32802	0.673247	0.829148	0.830674	-		GO:0043231//intracellular membrane-bounded organelle	-	-	COCehwD014727.1	CN01_11P002240
CN01_11P005250	CN01_11G005250	#N/A	#N/A	CRT3,103971503,LOC103707753,100273288,SORBI_3003G386600	#N/A	La+	1593	modules	ISS_3	IPR001580,IPR001279,IPR036866,IPR013320,IPR009033,IPR018124,IPR035680	putative Calreticulin-3	calreticulin 3	LOC_Os01g67054	0.79	0.72	0.99	72.55	118.763	190.143	213.705	0.711042	1.39004	1.55857	0.685939	0.830072	0.854704	K08057|1|1e-140|498|sbi:SORBI_03g042500|calreticulin		GO:0043231//intracellular membrane-bounded organelle	GO:0046872//metal ion binding;GO:0005515//protein binding	GO:0044267//cellular protein metabolic process	COCehwD009850.2	CN01_11P005250
CN01_scaffold011142P000020	CN01_scaffold011142G000020	ABA.12	BURP	BURP3,BURP5,BURP6,RD22,LOC103701411,LOC103699936,LOC103708992	11	La+	831	complete	ISS_2	IPR004873	BURP domain-containing protein 6	BURP domain-containing protein	LOC_Os01g53240	0.59	0.88	0.57	161.16	116.37	389.3	536.155	-0.469775	1.27239	1.73416	0.56652	0.822143	0.876012	-		-	-	-	COCehwD002169.1	CN01_U02P018070
CN01_06P001740	CN01_06G001740	#N/A	#N/A	GDCSP,GDCSPA,GDCSPB,LOC103712858,LOC103720219,LOC104600737	#N/A	La+	3123	complete	ISS_1	IPR015421,IPR015424,IPR003437,IPR020581,IPR015422	glycine dehydrogenase (decarboxylating), mitochondrial	glycine decarboxylase P-protein 2	LOC_Os01g51410	0.84	0.96	0.96	148.553	113.193	405.56	349.505	-0.392192	1.44893	1.23433	0.506829	0.841476	0.822215	K00281|1|0.0|1727|pop:POPTR_832093|glycine dehydrogenase [EC:1.4.4.2]		GO:0043234//protein complex;GO:0043231//intracellular membrane-bounded organelle	GO:0016628//oxidoreductase activity, acting on the CH-CH group of donors, NAD or NADP as acceptor;GO:0048037//cofactor binding;GO:0016642	GO:0006546//glycine catabolic process	COCehwD007426.1	CN01_06P001740
CN01_contig69280848P000010	CN01_contig69280848G000010	#N/A	#N/A	rps4,ERF116,At2g29770,LPAT3,TCM_037897,COLO4_34910,B456_010G070100,PRUPE_7G230000	#N/A	La+	249	complete	ISS_4	#N/A	conserved hypothetical protein	serine-rich protein-related	LOC_Os02g09090	0.84	0.22	0.16	117.273	106.043	284.547	403.535	-0.145221	1.27879	1.78282	0.26284	0.821137	0.877451	-		-	-	-	COCehwD000285.1	COCehwD000285.1
CN01_02P011730	CN01_02G011730	ROS	TRXM	TRM1,TRXM,LOC103711040,LOC103720516,9270622,TRIUR3_30421	#N/A	La+	327	complete	ISS_2	IPR017937,IPR005746,IPR013766,IPR036249	Thioredoxin	Thioredoxin superfamily protein	LOC_Os12g08730	0.81	0.9	0.56	180.18	102.51	555.09	671.1	-0.813674	1.62328	1.89709	0.728407	0.861505	0.88373	K03671|1|4e-40|160|ppp:PHYPADRAFT_150511|thioredoxin 1		GO:0009536//plastid	GO:0015036//disulfide oxidoreductase activity	GO:0051234//establishment of localization;GO:0018904;GO:0019725//cellular homeostasis;GO:0006091//generation of precursor metabolites and energy	COCehwD001558.1	CN01_02P011730
CN01_01P016010	CN01_01G016010	#N/A	#N/A	CIP1,SMC2-2,AGO4,MAP70.2,LOC103713288,ACMD2_27109,MA16_Dca012220,LOC104604693	#N/A	La+	393	fragment	ISS_4	IPR025067	conserved hypothetical protein	#N/A	LOC_Os02g03010	0.74	0.98	0.46	92.7833	99.89	220.6	215.41	0.106475	1.2495	1.21515	0.209742	0.815959	0.817146	-		-	-	-	COCehwD012768.1	CN01_01P016010
CN01_10P002730	CN01_10G002730	#N/A	#N/A	unknown_gene	#N/A	La+	774	fragment	ISS_4	IPR003675	conserved hypothetical protein	#N/A	ChrSy.fgenesh.mRNA.82	0.8	0.83	0.56	98.65	99.44	240.877	286.27	0.0115072	1.2879	1.53699	0.0764047	0.820847	0.854808	-		-	-	-	COCehwD017294.1	CN01_10P002730
CN01_14P002330	CN01_14G002330	#N/A	#N/A	DJC76,ATJ10,GFA2,ATJ6,LOC103708976,LOC104589728,BVC80_1333g2,LOC104609738	#N/A	La+	1014	complete	ISS_1	IPR017896,IPR001623,IPR001080,IPR036869	chaperone protein dnaJ C76, chloroplastic	DNAJ heat shock N-terminal domain-containing protein	LOC_Os01g53020	0.7	1	1	48.22	96.3967	169.977	138.05	0.999352	1.81763	1.51749	0.770227	0.866256	0.845359	K05337|1|2e-22|104|olu:OSTLU_7956|ferredoxin;K09510|4|4e-09|60.5|vcn:VOLCADRAFT_62070|DnaJ homolog subfamily B member 4;K03686|5|4e-09|60.5|rcu:RCOM_1526580|molecular chaperone DnaJ		GO:0009536//plastid	GO:0046914//transition metal ion binding;GO:0051540;GO:0005515//protein binding	GO:0044267//cellular protein metabolic process	COCehwD015585.1	CN01_14P002330
CN01_11P011090	CN01_11G011090	ABA	MYB,TF	PHL2,PHL3,APL,PHL12,LOC103710657,108951160,ACMD2_03588,103984085	7	La+	738	complete	ISS_1	IPR009057,IPR001005,IPR006447,IPR025756,IPR017930	protein PHR1-LIKE 2	Homeodomain-like superfamily protein	LOC_Os09g12750	0.72	0.98	0.98	84.3933	80.5233	198.01	206.92	-0.0677221	1.23037	1.29387	0.15661	0.811181	0.825772	K13606|1|9e-13|72.0|bdi:100846349|chlorophyll(ide) b reductase [EC:1.1.1.294];K14491|2|6e-11|65.9|ota:Ot16g01320|two-component response regulator ARR-B family		GO:0043231//intracellular membrane-bounded organelle	GO:0003676//nucleic acid binding	-	COCehwD016584.1	CN01_11P011090
CN01_16P005760	CN01_16G005760	#N/A	#N/A	EXPA2,EXPA4,EXPA8,103992517,103974608,LOC103720403	#N/A	La+	771	complete	ISS_1	IPR036908,IPR002963,IPR007117,IPR009009,IPR007118,IPR007112,IPR036749	expansin-A2	expansin A1	LOC_Os05g39990	0.81	0.92	0.96	53.41	73.1433	222.31	211.98	0.453616	2.05739	1.98875	0.533584	0.881114	0.882916	-		GO:0044464//cell part	-	-	COCehwD027279.1	CN01_16P005760
CN01_07P012190	CN01_07G012190	#N/A	#N/A	SALR,SDR1,SDR2b,LOC103708915,LOC103712117,LOC103698030	#N/A	La+	246	fragment	ISS_3	IPR002347,IPR036291	putative Salutaridine reductase	NAD(P)-binding Rossmann-fold superfamily protein	LOC_Os02g42810	0.54	0.88	0.23	30.9767	69.9067	106.023	83.915	1.17425	1.77513	1.43775	0.794776	0.856769	0.825678	K15095|1|1e-16|82.8|pop:POPTR_644424|(+)-neomenthol dehydrogenase [EC:1.1.1.208]		-	-	-	COCehwD023413.1	CN01_07P012190
CN01_11P011210	CN01_11G011210	#N/A	#N/A	FBA5,FBA7,LOC103702365,LOC104589811,LOC104594310,RCOM_1538490	#N/A	La+	1074	complete	ISS_1	IPR013785,IPR029768,IPR000741	fructose-bisphosphate aldolase 5, cytosolic	Aldolase superfamily protein	LOC_Os06g40640	0.85	1	1	90.5667	66.8367	278.94	234.22	-0.43834	1.6229	1.37081	0.532929	0.857982	0.836275	K01623|1|0.0|641|rcu:RCOM_1538490|fructose-bisphosphate aldolase, class I [EC:4.1.2.13]		GO:0009536//plastid	GO:0005488//binding;GO:0016832//aldehyde-lyase activity	GO:0006007//glucose catabolic process	COCehwD016596.1	CN01_11P011210
CN01_07P014620	CN01_07G014620	#N/A	#N/A	CAT1,CAT3,LOC103706873,LOC103716593,ACMD2_10434,CAT1_11	#N/A	La+	2883	modules	ISS_3	IPR024708,IPR000626,IPR018028,IPR002226,IPR011614,IPR029071,IPR020835,IPR037060,IPR006636,IPR010582	putative Catalase isozyme 1	catalase 2	LOC_Os03g03910	0.86	0.51	1	96.73	61.6	299.71	297.885	-0.651033	1.63153	1.62272	0.655148	0.858885	0.864862	K03781|1|0.0|949|vvi:100244516|catalase [EC:1.11.1.6]		GO:0005777//peroxisome	GO:0005506//iron ion binding;GO:0004601//peroxidase activity	GO:0042743//hydrogen peroxide metabolic process;GO:0006950//response to stress	COCehwD003967.1	CN01_07P014620
CN01_15P001270	CN01_15G001270	#N/A	#N/A	BLH1,BLH7,BLH6,BLH3,LOC103714292,LOC103703148	#N/A	La+	1953	complete	ISS_1	IPR006563,IPR001356,IPR008422,IPR009057	BEL1-like homeodomain protein 1	BEL1-like homeodomain 1	LOC_Os11g06020	0.44	1	1	42.77	61.29	146.2	131.97	0.519052	1.77327	1.62554	0.569645	0.86185	0.856592	-		-	-	-	COCehwD012360.1	CN01_15P001270
CN01_01P016390	CN01_01G016390	#N/A	#N/A	CYP709B2,CYP709B1,CYP709B3,CYP734A6,LOC103718353,LOC103719246,LOC103698412	#N/A	La+	1377	complete	ISS_2	IPR001128,IPR036396,IPR017972,IPR002401	Cytochrome P450 709B1	cytochrome P450, family 709, subfamily B, polypeptide 2	LOC_Os06g09220	0.57	1	1	61.1967	58.67	370.357	368.28	-0.0608301	2.59739	2.58928	0.138262	0.900295	0.904766	K10717|1|3e-97|353|gmx:100812567|cytokinin trans-hydroxylase;K15639|3|6e-97|352|aly:ARALYDRAFT_901457|cytochrome P450, family 734, subfamily A, polypeptide 1 (PHYB activation tagged suppressor 1) [EC:1.14.-.-]		GO:0031410//cytoplasmic vesicle;GO:0043231//intracellular membrane-bounded organelle	GO:0016491//oxidoreductase activity;GO:0005506//iron ion binding	-	COCehwD000942.1	CN01_01P016390
CN01_03P004970	CN01_03G004970	#N/A	AUX,DRM,ARP	At1g56220,At1g54070,DRM1,DRMH2,LOC103703317,ACMD2_27268,ACMD2_04344,103997918	21	La+	387	complete	ISS_2	IPR008406	dormancy-associated protein	Dormancy/auxin associated family protein	LOC_Os09g26620	0.52	0.96	0.95	46.4	56.47	146.25	155.51	0.28336	1.65624	1.74481	0.385058	0.85479	0.867501	-		-	-	-	COCehwD001922.1	CN01_03P004970
CN01_scaffold026027P000010	CN01_scaffold026027G000010	#N/A	#N/A	PDIL1-1,YSL3,PDIL1-2,GSO2,LOC103707781,POPTR_0007s02150g	#N/A	La+	543	complete	ISS_4	IPR012881	conserved hypothetical protein	Protein of unknown function (DUF1685)	LOC_Os02g52770	0.36	0.87	0.88	31.6267	42.57	78.2133	101.025	0.428696	1.30627	1.6755	0.488619	0.802383	0.856414	-		GO:0043231//intracellular membrane-bounded organelle	-	-	COCehwD012186.1	CN01_U02P017050
CN01_13P004250	CN01_13G004250	#N/A	#N/A	ZEP,ABA2,LOC103712512,103992210,BVC80_1825g70,ABA2_0	#N/A	La+	1977	complete	ISS_1	IPR000253,IPR017079,IPR008984,IPR002938,IPR036188	zeaxanthin epoxidase, chloroplastic	zeaxanthin epoxidase (ZEP) (ABA1)	LOC_Os04g37619	0.76	0.88	0.88	48.1967	41.7267	182.877	160.095	-0.207964	1.92387	1.73192	0.310916	0.872633	0.867178	K09838|1|0.0|899|vvi:100232944|zeaxanthin epoxidase [EC:1.14.13.90]		GO:0009536//plastid	GO:0016709//oxidoreductase activity, acting on paired donors, with incorporation or reduction of molecular oxygen, NAD(P)H as one donor, and incorporation of one atom of oxygen	GO:0009687//abscisic acid metabolic process	COCehwD020808.1	CN01_13P004250
CN01_12P008370	CN01_12G008370	#N/A	#N/A	At5g06060,At1g07440,At2g29170,SDR,LOC103697337,LOC103697356,LOC103697345,ACMD2_00313	#N/A	La+	813	complete	ISS_1	IPR002347,IPR036291,IPR020904	tropinone reductase	NAD(P)-binding Rossmann-fold superfamily protein	LOC_Os03g16230	0.58	0.97	0.97	32.8233	39.2267	202.087	176.77	0.257113	2.62218	2.42908	0.348142	0.896586	0.896047	K08081|1|3e-98|356|vvi:100265103|tropine dehydrogenase [EC:1.1.1.206]		-	GO:0003824//catalytic activity	GO:0008152//metabolic process	COCehwD028005.1	CN01_12P008370
CN01_01P013300	CN01_01G013300	#N/A	#N/A	RPM1,RPP8,RPP8L3,At1g58390,LOC103697581,LOC103697346,LOC103697344,ACMD2_10965	#N/A	La+	2811	complete	ISS_2	IPR032675,IPR041118,IPR002182,IPR038005,IPR027417	disease resistance protein RPM1-like	NB-ARC domain-containing disease resistance protein	LOC_Os04g21890	0.45	0.98	0.98	44.31	38.24	112.427	103.98	-0.21255	1.34328	1.2306	0.30833	0.816751	0.806425	K13457|1|0.0|650|vvi:100252764|disease resistance protein RPM1		GO:0031410//cytoplasmic vesicle	-	-	COCehwD012681.1	CN01_01P013300
CN01_02P010450	CN01_02G010450	ABA	CBS	CBSCBSPB3,CBSCBSPB2,CBSCBSPB4,CBSCBSPB5,LOC103701272,103976052,CDCP-1,BVC80_8571g3	#N/A	La+	1734	complete	ISS_2	IPR000644,IPR000270,IPR034896	CBS domain-containing protein CBSCBSPB3	CBS / octicosapeptide/Phox/Bemp1 (PB1) domains-containing protein	LOC_Os12g07190	0.66	0.87	0.96	57.0033	37.8667	143.563	134.8	-0.590118	1.33257	1.2417	0.60485	0.820268	0.813225	-		-	-	-	COCehwD007285.1	CN01_02P010450
CN01_scaffold003089P000020	CN01_scaffold003089G000020	#N/A	#N/A	NAC037,HUP3,LOC103697786	#N/A	La+	483	fragment	ISS_4	IPR005134	conserved hypothetical protein	Uncharacterised protein family (UPF0114)	LOC_Os06g49640	0.73	0.77	0.48	28.5867	37.5133	240.043	314.625	0.392061	3.06988	3.46022	0.451282	0.904073	0.913287	-		GO:0009536//plastid	-	-	COCehwD014021.1	CN01_U01P005230
CN01_01P013140	CN01_01G013140	#N/A	#N/A	ATJ11,ATJ20,DJC76,DJA6,LOC103696211,LOC108510699,103998456,103980327	#N/A	La+	297	complete	ISS_2	IPR036869,IPR001623	chaperone protein dnaJ 11, chloroplastic	Chaperone DnaJ-domain superfamily protein	LOC_Os08g43490	0.48	0.87	0.7	61.7167	37.4667	148.53	152.575	-0.720053	1.26702	1.30579	0.665197	0.812897	0.824249	K03686|1|2e-10|62.4|ota:Ot10g00240|molecular chaperone DnaJ;K09517|3|7e-09|57.0|rcu:RCOM_1347490|DnaJ homolog subfamily B member 11		-	-	-	COCehwD012665.1	CN01_01P013140
CN01_scaffold018848P000010	CN01_scaffold018848G000010	#N/A	#N/A	unknown_gene	#N/A	La+	327	missing_functional_completeness	ISS_5	IPR022149	hypothetical protein	#N/A	LOC_Os01g05210	0.3	0.82	0.79	22.2733	37.08	58.91	111.03	0.735324	1.4032	2.31756	0.636331	0.801659	0.886494	-		-	-	-	COCehwD008211.1	CN01_U03P010680
CN01_scaffold000106P000010	CN01_scaffold000106G000010	#N/A	#N/A	SFH2,SFH12,SFH1,SFH11,LOC103724072,ACMD2_15100	#N/A	La+	630	complete	ISS_2	IPR001251,IPR036865,IPR011074,IPR036273	phosphatidylinositol transfer protein 3	Sec14p-like phosphatidylinositol transfer family protein	LOC_Os01g70210	0.47	0.97	0.97	60.8533	36.8467	170.7	194.35	-0.723802	1.48805	1.67525	0.664646	0.838373	0.866667	-		-	-	-	COCehwD001540.2	CN01_U01P002660
CN01_scaffold008402P000010	CN01_scaffold008402G000010	#N/A	#N/A	CAT1,CAT3,CAT2,LOC103716593,LOC103706873,ACMD2_10434,CAT1_11	#N/A	La+	1386	complete	ISS_1	IPR018028,IPR024711,IPR002226,IPR011614,IPR010582,IPR020835,IPR037060,IPR024708	Catalase isozyme 1	catalase 2	LOC_Os03g03910	0.87	1	0.93	74.0833	36.7933	198.237	194.285	-1.0097	1.42	1.39095	0.763826	0.833954	0.837005	K03781|1|0.0|902|pop:POPTR_550767|catalase [EC:1.11.1.6]		GO:0042579//microbody	GO:0005506//iron ion binding;GO:0004601//peroxidase activity	GO:0042743//hydrogen peroxide metabolic process;GO:0006950//response to stress	COCehwD026220.1	CN01_U02P006160
CN01_scaffold014606P000020	CN01_scaffold014606G000020	#N/A	#N/A	rpl22,LOC103697973,LOC103711999,AXF42_Ash018439,103971280	#N/A	La+	627	complete	ISS_4	IPR000270	conserved hypothetical protein	Octicosapeptide/Phox/Bem1p family protein	LOC_Os11g25780	0.71	0.64	0.65	58.8033	35.8233	223.097	340.76	-0.714998	1.9237	2.53479	0.659203	0.874674	0.903098	-		-	GO:0005488//binding	-	COCehwD005444.2	CN01_U02P020490
CN01_15P000590	CN01_15G000590	#N/A	#N/A	At3g10130,IAA27,KIN7C,Os04g0452000,LOC103705716,BVC80_1751g161,LOC104607669,RchiOBHm_Chr3g0473811	#N/A	La+	891	complete	ISS_1	IPR006917,IPR011256	heme-binding-like protein At3g10130, chloroplastic	SOUL heme-binding family protein	LOC_Os02g33020	0.75	0.73	0.77	38.3433	33.61	102.74	115.625	-0.190085	1.42195	1.59241	0.282802	0.82317	0.850261	-		-	-	-	COCehwD021008.1	CN01_15P000590
CN01_06P020380	CN01_06G020380	#N/A	#N/A	GLO1,B456_002G037900,LOC103705751,LOC104588484,LOC103697143	#N/A	La+	828	modules	ISS_3	IPR000262,IPR013785,IPR037396,IPR012133	putative peroxisomal (S)-2-hydroxy-acid oxidase-like	Aldolase-type TIM barrel family protein	LOC_Os03g57220	0.835	0.99	0.74	52.5	31.7867	266.413	234.06	-0.723896	2.34328	2.15649	0.656258	0.892559	0.890811	K11517|1|7e-107|384|aly:ARALYDRAFT_333142|(S)-2-hydroxy-acid oxidase [EC:1.1.3.15]		-	-	-	COCehwD003100.1	CN01_06P020380
CN01_06P002900	CN01_06G002900	#N/A	#N/A	SIGE,SIGB,SIGF,SIGA,LOC103722153,103992743,PanWU01x14_225400,CFP56_14644	#N/A	La+	1497	complete	ISS_1	IPR013324,IPR007627,IPR007630,IPR014284,IPR000943,IPR013325,IPR036388,IPR007624	RNA polymerase sigma factor sigE, chloroplastic/mitochondrial	sigma factor E	LOC_Os05g50930	0.55	0.97	0.98	62.73	30.4267	186.61	232.43	-1.04382	1.5728	1.88957	0.763212	0.848536	0.878181	K03093|1|2e-146|517|vvi:100250120|RNA polymerase sigma factor		GO:0043231//intracellular membrane-bounded organelle	GO:0003676//nucleic acid binding;GO:0034062//RNA polymerase activity;GO:0001071//nucleic acid binding transcription factor activity;GO:0000996	GO:0006351//transcription, DNA-dependent;GO:0009639//response to red or far red light	COCehwD008235.1	CN01_06P002900
CN01_01P012730	CN01_01G012730	#N/A	#N/A	At5g10770,AED1,APF2,ASPG2,LOC103718934,LOC103696872,LOC103722380,ACMD2_18970	#N/A	La+	1218	complete	ISS_2	IPR032799,IPR021109,IPR001969,IPR032861,IPR033121,IPR001461,IPR033873	Aspartyl protease family protein At5g10770	Eukaryotic aspartyl protease family protein	LOC_Os09g30414	0.55	1	0.85	30.49	29.9067	191.257	234.495	-0.027869	2.6491	2.94315	0.093966	0.896475	0.907019	K00924|1|8e-34|142|ath:AT5G22850|[EC:2.7.1.-];K08245|3|4e-07|54.3|zma:100286141|phytepsin [EC:3.4.23.40]		-	GO:0016787//hydrolase activity	-	COCehwD027412.1	CN01_01P012730
CN01_05P008150	CN01_05G008150	#N/A	#N/A	KAS2,KAS1,KAS12,KAS,LOC103702348,LOC103703313	#N/A	La+	1623	complete	ISS_2	IPR016039,IPR014030,IPR014031,IPR000794,IPR020841,IPR018201	3-oxoacyl-[acyl-carrier-protein] synthase II, chloroplastic	fatty acid biosynthesis 1	LOC_Os03g28420	0.78	0.82	0.87	30.5067	29.37	99.0667	121.3	-0.0547813	1.69928	1.99138	0.117576	0.850632	0.876001	K09458|1|0.0|676|vvi:100253210|3-oxoacyl-[acyl-carrier-protein] synthase II [EC:2.3.1.179]		-	-	-	COCehwD015780.2	CN01_05P008150
CN01_05P000940	CN01_05G000940	#N/A	#N/A	Os12g0632700,MDHG,LOC103698943,VIT_03s0088g01190,CCACVL1_16220	#N/A	La+	906	complete	ISS_2	IPR010097,IPR001252,IPR001236,IPR022383,IPR036291,IPR015955,IPR001557	Malate dehydrogenase, glyoxysomal	peroxisomal NAD-malate dehydrogenase 2	LOC_Os12g43630	0.76	1	0.83	22.2367	24.9733	127.103	132.39	0.167448	2.51499	2.57378	0.24043	0.889236	0.89538	K00026|1|3e-135|479|vvi:100232924|malate dehydrogenase [EC:1.1.1.37]		GO:0005777//peroxisome	GO:0016615//malate dehydrogenase activity	GO:0009060//aerobic respiration;GO:0044262//cellular carbohydrate metabolic process;GO:0043648//dicarboxylic acid metabolic process	COCehwD020915.1	CN01_05P000940
CN01_07P005240	CN01_07G005240	#N/A	#N/A	EXPB5,EXPB18,EXPB15,EXPB2,LOC103717281,LOC103717279,CISIN_1g024303mg,CICLE_v10005627mg	#N/A	La+	780	complete	ISS_1	IPR007112,IPR005795,IPR007117,IPR009009,IPR036908,IPR036749,IPR007118	expansin-B5	expansin B2	LOC_Os04g46650	0.63	0.89	0.84	15.7533	24.8433	137.723	110.8	0.657202	3.12804	2.81423	0.562734	0.899461	0.896861	-		-	-	-	COCehwD022496.1	CN01_07P005240
CN01_scaffold020783P000020	CN01_scaffold020783G000020	#N/A	#N/A	UNE10,BHLH23,ALC,BHLH72,LOC103711637,RCOM_1609910,MANES_05G049900,MANES_01G269700	#N/A	La+	462	fragment	ISS_3	#N/A	putative Transcription factor UNE10	basic helix-loop-helix (bHLH) DNA-binding superfamily protein	LOC_Os10g40740	0.43	0.92	0.29	28.2333	24.8133	113.5	157.685	-0.186284	2.00722	2.48157	0.265758	0.871027	0.89539	-		-	-	-	COCehwD009523.1	CN01_U02P021070
CN01_02P010050	CN01_02G010050	#N/A	#N/A	FAF3,FAF1,At5g22090,FAF4,LOC103703099,LOC108511306,BVC80_1751g183,ACMD2_11680	#N/A	La+	717	complete	ISS_2	IPR021410	protein FANTASTIC FOUR 1	Protein of unknown function (DUF3049)	LOC_Os12g05890	0.42	0.82	0.82	42.5167	24.0133	114.31	113.915	-0.824193	1.42685	1.42186	0.674613	0.826308	0.83203	-		-	-	-	COCehwD010220.1	CN01_02P010050
CN01_02P014260	CN01_02G014260	#N/A	#N/A	PTAC5,ATJ1,CESA4,LOC103715847,LOC103718324,LOC104591728,AMTR_s00013p00178870	#N/A	La+	303	complete	ISS_4	#N/A	conserved hypothetical protein	chaperone protein dnaJ-related	LOC_Os02g30320	0.56	0.94	0.81	35.05	20.9333	98.4967	120.44	-0.743612	1.49066	1.78083	0.631917	0.828376	0.86553	K03686|1|3e-06|48.1|ppp:PHYPADRAFT_114130|molecular chaperone DnaJ		-	GO:0005515//protein binding	GO:0044267//cellular protein metabolic process	COCehwD018459.1	CN01_02P014260
CN01_01P012230	CN01_01G012230	#N/A	#N/A	TDT,SAC1,SLT3,SLT2,LOC103719047	#N/A	La+	1326	complete	ISS_2	IPR001898	Tonoplast dicarboxylate transporter	tonoplast dicarboxylate transporter	LOC_Os09g31130	0.7	0.99	0.82	31.99	20.62	101.95	87.65	-0.633577	1.67217	1.45413	0.57775	0.849295	0.827931	K14445|1|1e-179|627|pop:POPTR_717389|solute carrier family 13 (sodium-dependent dicarboxylate transporter), member 2/3/5		GO:0043231//intracellular membrane-bounded organelle	GO:0015556//C4-dicarboxylate transmembrane transporter activity	GO:0015743//malate transport;GO:0030641//regulation of cellular pH;GO:0030001//metal ion transport	COCehwD005469.1	CN01_01P012230
CN01_03P001380	CN01_03G001380	#N/A	#N/A	SULTR3;1,SULTR3;2,SULTR3;3,SULTR3;4,LOC103721109,LOC103719682,LOC104598652	#N/A	La+	1890	complete	ISS_1	IPR018045,IPR001902,IPR002645,IPR005630,IPR036513,IPR011547,IPR030311	sulfate transporter 3.1	sulfate transporter 3,4	LOC_Os06g05160	0.56	0.97	0.9	42.05	17.6733	105.077	141.035	-1.25053	1.32126	1.74588	0.777263	0.812435	0.866437	-		-	-	-	COCehwD017795.1	CN01_03P001380
CN01_01P018050	CN01_01G018050	#N/A	LRR	RLP45,RLP9A,RLP21,RLP9B,LOC103698575,LOC103715910,ACMD2_23505,ACMD2_15718	#N/A	La+	2517	complete	ISS_2	IPR003591,IPR025875,IPR001611,IPR032675	receptor-like protein 9b	disease resistance family protein / LRR family protein	LOC_Os01g41770	0.31	0.99	0.85	39.33	17.5367	152.53	184.88	-1.16526	1.95539	2.23289	0.760688	0.872406	0.889935	K13420|1|1e-76|286|aly:ARALYDRAFT_356368|LRR receptor-like serine/threonine-protein kinase FLS2 [EC:2.7.11.1]		-	-	-	COCehwD021749.1	CN01_01P018050
CN01_03P009080	CN01_03G009080	PS	#N/A	RBCS1,SSU5A,SSU5B,SSU26,LOC103719573,LOC103712908,ACMD2_12570,rbcS-mc	#N/A	La+	543	complete	ISS_1	IPR024680,IPR000894,IPR036385,IPR024681	ribulose bisphosphate carboxylase small chain, chloroplastic	ribulose bisphosphate carboxylase small chain 1A	LOC_Os12g17600	0.73	0.98	0.94	22370.4	31857.2	49945.1	40392.7	0.51003	1.15875	0.852502	0.606375	0.811284	0.736702	K01602|1|2e-71|266|bdi:100829841|ribulose-bisphosphate carboxylase small chain [EC:4.1.1.39]		-	-	-	COCehwD011747.1	CN01_03P009080
CN01_scaffold019863P000030	CN01_scaffold019863G000030	#N/A	#N/A	PSAL,LOC103724125,CICLE_v10016637mg,CUMW_135560,TCM_002614	#N/A	La+	660	complete	ISS_1	IPR036592,IPR003757,IPR022980	photosystem I reaction center subunit XI, chloroplastic	photosystem I subunit l	LOC_Os12g23200	0.77	1	1	3958.17	5909.77	8572.89	7188.4	0.578269	1.11495	0.860837	0.646815	0.803541	0.739414	K02699|1|2e-84|309|rcu:RCOM_1628230|photosystem I subunit XI		GO:0009507//chloroplast;GO:0009522//photosystem I	-	-	COCehwD008859.1	CN01_U02P021410
CN01_scaffold006093P000010	CN01_scaffold006093G000010	PSI	#N/A	psaD,LOC103716456,RCOM_0677760,POPTR_0008s15100g	#N/A	La+	630	complete	ISS_1	IPR003685,IPR036579	photosystem I reaction center subunit II, chloroplastic	photosystem I subunit D-2	LOC_Os08g44680	0.76	1	1	1930.2	3364.79	4546.81	3608.09	0.801769	1.23611	0.902487	0.735794	0.82264	0.749572	K02692|1|8e-88|320|rcu:RCOM_0677760|photosystem I subunit II		GO:0009534//chloroplast thylakoid;GO:0009522//photosystem I	-	GO:0044237//cellular metabolic process	COCehwD022334.1	CN01_U01P013690
CN01_scaffold014605P000070	CN01_scaffold014605G000070	#N/A	#N/A	LHCB5,CAB1R,CAB22R,HannXRQ_Chr11g0326521,LOC103720831,CDL12_25920,CICLE_v10021452mg	#N/A	La+	1050	complete	ISS_2	IPR001344,IPR023329,IPR022796	Chlorophyll a-b binding protein CP26, chloroplastic	light harvesting complex of photosystem II 5	LOC_Os11g13890	0.63	0.97	0.99	2002.14	2671.06	4619.4	3866.54	0.415867	1.20616	0.949498	0.54322	0.817696	0.766416	K08916|1|7e-109|392|vvi:100246457|light-harvesting complex II chlorophyll a/b binding protein 5		GO:0009503;GO:0009523//photosystem II;GO:0009570//chloroplast stroma	-	GO:0044237//cellular metabolic process;GO:0009639//response to red or far red light	COCehwD005434.1	CN01_U01P009740
CN01_08P010980	CN01_08G010980	#N/A	#N/A	ENOD12A,LOC103707036,DCAR_027310,GOBAR_DD23585,B456_005G049700	#N/A	La+	405	complete	ISS_2	#N/A	early nodulin-75	#N/A	#N/A	#N/A	#N/A	#N/A	1355.62	2577.02	3883.5	996.165	0.926747	1.5184	-0.4445	0.776069	0.854666	0.536243	-		-	-	-	COCehwD015941.1	CN01_08P010980
CN01_13P007640	CN01_13G007640	#N/A	#N/A	At1g58390,NIA1,UGT87A2,MA16_Dca018036,AXF42_Ash019530,MA16_Dca025960,ARALYDRAFT_900476	#N/A	La+	159	complete	ISS_1	#N/A	Expressed protein	NB-ARC domain-containing disease resistance protein	LOC_Os04g46300	0.47	0.62	0.03	1347.36	2506.42	4228.86	2720.12	0.895495	1.65013	1.01353	0.765999	0.865856	0.785847	-		-	-	-	COCehwD013016.1	CN01_13P007640
CN01_02P016260	CN01_02G016260	#N/A	#N/A	GAPA1,GAPA,GAPA2,LOC103712351,L484_007581,TCM_017432,TorRG33x02_206100	#N/A	La+	1215	complete	ISS_1	IPR006424,IPR020830,IPR020829,IPR020831,IPR020828,IPR036291	glyceraldehyde-3-phosphate dehydrogenase A, chloroplastic	glyceraldehyde 3-phosphate dehydrogenase A subunit 2	LOC_Os04g38600	0.84	1	1	1472.3	2314.44	3613.47	3019.73	0.652588	1.29531	1.03634	0.679834	0.829583	0.793794	K05298|1|1e-169|593|rcu:RCOM_1443660|glyceraldehyde-3-phosphate dehydrogenase (NADP+) (phosphorylating) [EC:1.2.1.13]		-	GO:0000166//nucleotide binding	GO:0019318//hexose metabolic process	COCehwD002663.1	CN01_02P016260
CN01_14P007050	CN01_14G007050	#N/A	#N/A	PSBQ2,PSBQ1,PSBQ,ACMD2_07241,PanWU01x14_367720,LOC104590162	#N/A	La+	708	complete	ISS_1	IPR023222,IPR008797	oxygen-evolving enhancer protein 3-1, chloroplastic	photosystem II subunit QA	LOC_Os07g36080	0.64	1	1	612.7	1206.17	1322.14	1201.76	0.977184	1.10963	0.971896	0.787395	0.802624	0.771871	K08901|1|1e-62|237|vvi:100240959|photosystem II oxygen-evolving enhancer protein 3		-	-	-	COCehwD004333.1	CN01_14P007050
CN01_07P008720	CN01_07G008720	#N/A	#N/A	PGRL1A,PGRL1B,NRPB12,At2g23200,LOC103696961,LOC103702797	#N/A	La+	975	complete	ISS_1	IPR039987	PGR5-like protein 1A, chloroplastic	PGR5-LIKE A	LOC_Os03g64020	0.67	0.99	0.99	339.453	646.743	745.337	608.635	0.92998	1.13468	0.842364	0.774393	0.804506	0.731466	-		GO:0043231//intracellular membrane-bounded organelle	-	-	COCehwD013768.3	CN01_07P008720
CN01_07P014010	CN01_07G014010	#N/A	#N/A	GAPB,LOC103704929,TorRG33x02_137800,PanWU01x14_355590,PRUPE_5G008000	#N/A	La+	1065	complete	ISS_2	IPR020828,IPR006424,IPR020831,IPR036291,IPR020830,IPR020829	Glyceraldehyde-3-phosphate dehydrogenase GAPB, chloroplastic	glyceraldehyde-3-phosphate dehydrogenase B subunit	LOC_Os03g03720	0.72	0.99	0.9	482.68	421.713	1051.56	936.88	-0.194804	1.1234	0.956797	0.321766	0.803534	0.767522	K05298|1|1e-146|517|pop:POPTR_831715|glyceraldehyde-3-phosphate dehydrogenase (NADP+) (phosphorylating) [EC:1.2.1.13]		GO:0009536//plastid	GO:0005488//binding	GO:0005975//carbohydrate metabolic process;GO:0044237//cellular metabolic process	COCehwD025097.1	CN01_07P014010
CN01_scaffold016575P000080	CN01_scaffold016575G000080	#N/A	#N/A	PTAC16,TIC62,LOC103715678,LOC104597119,103999794,TIC62_5	#N/A	La+	1530	complete	ISS_1	IPR016040,IPR036291	protein PLASTID TRANSCRIPTIONALLY ACTIVE 16, chloroplastic	plastid transcriptionally active 16	LOC_Os05g22614	0.57	1	1	328.363	385.99	724.08	650.01	0.23327	1.14086	0.985169	0.365055	0.806161	0.776179	-		GO:0009526//plastid envelope;GO:0009534//chloroplast thylakoid;GO:0000229	-	-	COCehwD006875.1	CN01_U02P003310
CN01_scaffold027714P000020	CN01_scaffold027714G000020	PSII	#N/A	OHP2,PSBS,LOC103697636,LOC103720677,103984696,MA16_Dca001182	#N/A	La+	645	modules	ISS_3	#N/A	putative Light-harvesting complex-like protein OHP2, chloroplastic	one-helix protein 2	LOC_Os01g40710	0.59	0.77	0.99	208.743	335.157	489.337	395.95	0.683106	1.2291	0.923588	0.689539	0.817627	0.752284	-		GO:0043231//intracellular membrane-bounded organelle	-	-	COCehwD012849.1	CN01_U03P010660
CN01_01P004690	CN01_01G004690	ROS	PER,GPX	GPX7,GPX1,CSA,LOC103707439	33	La+	732	complete	ISS_1	IPR000889,IPR029759,IPR029760,IPR036249	phospholipid hydroperoxide glutathione peroxidase 1, chloroplastic	glutathione peroxidase 7	LOC_Os06g08670	0.89	0.7	0.73	208.543	317.457	474.633	415.595	0.606212	1.18647	0.994831	0.656665	0.811718	0.774259	K00432|1|1e-89|327|sbi:SORBI_10g005820|glutathione peroxidase [EC:1.11.1.9]		GO:0009536//plastid	GO:0004601//peroxidase activity	GO:0008152//metabolic process;GO:0006950//response to stress;GO:0009628//response to abiotic stimulus	COCehwD021584.1	CN01_01P004690
CN01_scaffold010818P000040	CN01_scaffold010818G000040	#N/A	#N/A	petM,FHL,BTS,LOC103723892,AXF42_Ash000158,petM_0	#N/A	La+	375	complete	ISS_2	IPR012595	Cytochrome b6-f complex subunit 7	cytochrome b6f complex subunit (petM), putative	LOC_Os03g55720	0.53	0.99	0.99	215.013	257.633	502.673	441.9	0.260893	1.2252	1.03929	0.394681	0.817779	0.790311	-		-	-	-	COCehwD001852.1	CN01_U02P009680
CN01_02P007830	CN01_02G007830	#N/A	#N/A	RPE,Os09g0505700,LOC103700230,LOC106768264,Vigan.01G458900	#N/A	La+	867	complete	ISS_1	IPR000056,IPR011060,IPR013785	ribulose-phosphate 3-epimerase, chloroplastic	D-ribulose-5-phosphate-3-epimerase	LOC_Os03g07300	0.86	0.87	0.94	199.437	206.883	450.643	401.955	0.0528868	1.17606	1.0111	0.131834	0.81025	0.781925	K01783|1|1e-128|457|vvi:100267206|ribulose-phosphate 3-epimerase [EC:5.1.3.1]		-	-	-	COCehwD018508.1	CN01_02P007830
CN01_scaffold004822P000010	CN01_scaffold004822G000010	#N/A	#N/A	CCD,CCD1,LOC103715930,103979882,LOC109018846	#N/A	La+	1320	complete	ISS_2	IPR004294	Carotenoid 9,10(9',10')-cleavage dioxygenase	carotenoid cleavage dioxygenase 1	LOC_Os12g44310	0.83	1	0.81	152.46	206.813	359.507	276.475	0.439898	1.23759	0.858718	0.54927	0.817772	0.732562	K11159|1|0.0|770|vvi:100232972|carotenoid cleavage dioxygenase		GO:0044424//intracellular part	GO:0016701//oxidoreductase activity, acting on single donors with incorporation of molecular oxygen;GO:0043169//cation binding	GO:0008152//metabolic process	COCehwD019446.1	CN01_U02P000780
CN01_05P008790	CN01_05G008790	ABA	MYB,TF	C1,TT2,MYB12,MYB5,LOC103712638,LOC103705860,LOC103703276,103977618	#N/A	La+	870	complete	ISS_1	IPR017930,IPR009057,IPR001005,IPR015495	transcription factor MYB4	myb domain protein 7	LOC_Os06g10350	0.53	0.58	0.69	101.313	204.853	251.273	130.31	1.01577	1.31043	0.363124	0.789685	0.823805	0.461421	K09422|1|2e-65|247|vvi:100264614|myb proto-oncogene protein, plant		-	-	-	COCehwD006567.1	CN01_05P008790
CN01_14P000260	CN01_14G000260	#N/A	#N/A	GDCSP,GDCSPA,GDCSPB,LOC103720219,LOC103712858,LOC104600737	#N/A	La+	3123	complete	ISS_1	IPR020581,IPR015424,IPR003437,IPR015422,IPR015421	glycine dehydrogenase (decarboxylating), mitochondrial	glycine decarboxylase P-protein 2	LOC_Os01g51410	0.83	0.96	0.96	403.867	200.367	873.17	714.45	-1.01124	1.11238	0.822954	0.793327	0.801859	0.726241	K00281|1|0.0|1648|vvi:100266170|glycine dehydrogenase [EC:1.4.4.2]		GO:0043234//protein complex;GO:0009526//plastid envelope;GO:0005576//extracellular region	GO:0016642;GO:0016628//oxidoreductase activity, acting on the CH-CH group of donors, NAD or NADP as acceptor;GO:0048037//cofactor binding	GO:0010038//response to metal ion;GO:0006546//glycine catabolic process	COCehwD024732.1	CN01_14P000260
CN01_05P006670	CN01_05G006670	#N/A	#N/A	ABC1K8,ABC1K7,ABC1K3,ABC1K1,LOC103721193,LOC104600034,AXF42_Ash002951	#N/A	La+	2403	complete	ISS_2	IPR004147,IPR011009	Protein ACTIVITY OF BC1 COMPLEX KINASE 8, chloroplastic	ABC2 homolog 13	LOC_Os02g36570	0.74	0.81	0.81	136.773	184.983	310.96	266.745	0.435608	1.18494	0.963674	0.547738	0.808236	0.761786	K08869|1|1e-115|416|osa:4346513|aarF domain-containing kinase;K13457|4|7e-71|267|vvi:100252764|disease resistance protein RPM1		GO:0043231//intracellular membrane-bounded organelle	-	-	COCehwD002443.3	CN01_05P006670
CN01_07P008060	CN01_07G008060	#N/A	#N/A	HIPP39,HIPP14,HIPP11,HIPP12,LOC103716912,ACMD2_19429,POPTR_0002s16500g,BVC80_1265g33	#N/A	La+	417	complete	ISS_2	#N/A	Heavy metal-associated isoprenylated plant protein 39	Heavy metal transport/detoxification superfamily protein	LOC_Os10g38870	0.45	0.99	0.8	331.14	171.96	785.863	657.185	-0.945368	1.24684	0.988858	0.775766	0.822819	0.776189	-		-	GO:0043169//cation binding	GO:0006812//cation transport	COCehwD018951.1	CN01_07P008060
CN01_10P007070	CN01_10G007070	PSII	#N/A	PSB28,psb28,SAC9,LOC103721578,103985664,LOC104600982	#N/A	La+	420	fragment	ISS_3	IPR005610,IPR038676	putative Photosystem II reaction center PSB28 protein, chloroplastic	photosystem II reaction center PSB28 protein	LOC_Os01g71190	0.87	0.83	0.64	80.0667	140.1	193.347	127.255	0.807183	1.27192	0.668449	0.724027	0.816579	0.655935	K08903|1|6e-59|223|vvi:100260011|photosystem II 13kDa protein		GO:0009523//photosystem II	-	GO:0044237//cellular metabolic process	COCehwD027423.1	CN01_10P007070
CN01_scaffold012601P000040	CN01_scaffold012601G000040	#N/A	#N/A	PAP8,PAP4,PAP2,PAP,LOC103701471,LOC103707055,103973134	#N/A	La+	687	complete	ISS_3	IPR039633,IPR006843	putative plastid-lipid-associated protein 8, chloroplastic	Plastid-lipid associated protein PAP / fibrillin family protein	LOC_Os04g34460	0.24	0.96	0.82	58.6033	125.36	164.307	126.225	1.09702	1.48734	1.10694	0.799763	0.837815	0.7937	-		GO:0009526//plastid envelope	-	-	COCehwD003681.1	CN01_U02P006670
CN01_05P007840	CN01_05G007840	#N/A	#N/A	PDS1,PDS,ACMD2_02128	#N/A	La+	1749	complete	ISS_1	IPR014102,IPR002937,IPR036188,IPR001613	15-cis-phytoene desaturase, chloroplastic/chromoplastic	phytoene desaturase 3	LOC_Os03g08570	0.8	1	1	57.3267	121.66	189.023	123.51	1.08558	1.72129	1.10735	0.797293	0.862402	0.793377	K02293|1|0.0|939|osa:4331854|15-cis-phytoene desaturase [EC:1.3.5.5]		-	-	-	COCehwD015811.2	CN01_05P007840
CN01_03P000330	CN01_03G000330	#N/A	#N/A	BXL4,Xyl2,BXL2,Xyl1,Glc1-1,LOC103708257	#N/A	La+	1512	fragment	ISS_3	IPR036962,IPR036881,IPR017853,IPR002772,IPR001764	putative Beta-D-xylosidase 4	Glycosyl hydrolase family protein	LOC_Os03g53800	0.79	0.96	0.77	67.6133	92.1967	161.493	136.665	0.447407	1.25609	1.01526	0.541496	0.813152	0.772518	K01188|1|2e-157|554|bdi:100825601|beta-glucosidase [EC:3.2.1.21]		GO:0031410//cytoplasmic vesicle	GO:0015926//glucosidase activity	GO:0044238//primary metabolic process	COCehwD007074.1	CN01_03P000330
CN01_07P003760	CN01_07G003760	#N/A	#N/A	SNL6,TKPR1,CCR2,CCR1,LOC103711762,LOC103704711,ACMD2_14435,103982459	#N/A	La+	861	complete	ISS_1	IPR016040,IPR036291	cinnamoyl-CoA reductase-like SNL6	NAD(P)-binding Rossmann-fold superfamily protein	LOC_Os10g42620	0.58	0.99	0.94	86.7033	90.8033	214.193	118.59	0.0666578	1.30475	0.451823	0.157051	0.820812	0.528984	K09753|1|1e-42|171|sbi:SORBI_07g021680|cinnamoyl-CoA reductase [EC:1.2.1.44]		-	GO:0048037//cofactor binding;GO:0033764//steroid dehydrogenase activity, acting on the CH-OH group of donors, NAD or NADP as acceptor	GO:0008202//steroid metabolic process	COCehwD001280.1	CN01_07P003760
CN01_scaffold007470P000040	CN01_scaffold007470G000040	ABA	MYB,SANT	TT2,C1,MYB6,MYB3,LOC103703276,103995483,LOC103712638,103977618	#N/A	La+	867	complete	ISS_2	IPR001005,IPR017930,IPR015495,IPR009057	transcription factor TT2	Duplicated homeodomain-like superfamily protein	LOC_Os03g29614	0.44	0.91	0.83	51.8033	80.0533	134.943	59.865	0.627917	1.38124	0.208668	0.639394	0.823991	0.303546	K09422|1|2e-77|286|vvi:100264512|myb proto-oncogene protein, plant		-	-	-	COCehwD024763.3	CN01_U02P012490
CN01_04P009120	CN01_04G009120	#N/A	#N/A	DVR,LOC103723232,TorRG33x02_021630,CUMW_019870,CICLE_v10005043mg	#N/A	La+	1242	complete	ISS_1	IPR036291,IPR016040	divinyl chlorophyllide a 8-vinyl-reductase, chloroplastic	NAD(P)-binding Rossmann-fold superfamily protein	LOC_Os03g22780	0.73	0.83	0.84	59.36	73.37	142.783	128.76	0.305699	1.26626	1.11712	0.421292	0.812249	0.795401	-		-	-	-	COCehwD020702.1	CN01_04P009120
CN01_04P012040	CN01_04G012040	#N/A	#N/A	At5g39570,PEX4,MA16_Dca008512,ACMD2_06043	#N/A	La+	933	fragment	ISS_4	IPR038943	conserved hypothetical protein	#N/A	LOC_Os07g48420	0.36	0.93	0.7	51.33	68.88	120.853	91.4	0.424283	1.23538	0.832392	0.509898	0.805037	0.705017	-		-	-	-	COCehwD024175.1	CN01_04P012040
CN01_scaffold008171P000010	CN01_scaffold008171G000010	#N/A	TIFY	VIT_05s0020g04070,ARD4,VIT_05s0020g04080,CCACVL1_27674,FSB_LOCUS9966,L484_013320,LOC103718242	#N/A	La+	1605	complete	ISS_2	IPR004313,IPR010399,IPR014710,IPR011051,IPR027496,IPR018467	1,2-dihydroxy-3-keto-5-methylthiopentene dioxygenase	RmlC-like cupins superfamily protein	LOC_Os10g28360	0.66	0.34	0.98	51.7933	68.2533	120.743	96.225	0.398133	1.22111	0.893645	0.49244	0.801542	0.723081	K08967|1|3e-84|311|rcu:RCOM_0911100|1,2-dihydroxy-3-keto-5-methylthiopentene dioxygenase [EC:1.13.11.53 1.13.11.54]		-	GO:0043169//cation binding;GO:0016702//oxidoreductase activity, acting on single donors with incorporation of molecular oxygen, incorporation of two atoms of oxygen	GO:0043102	COCehwD025960.1	CN01_U02P007280
CN01_06P014510	CN01_06G014510	#N/A	#N/A	RBCX2,RBCX1,rpl2,FTSH5,LOC103703694,LOC103704570,TCM_040706	#N/A	La+	660	complete	ISS_1	IPR003435,IPR038052	chaperonin-like RbcX protein 2, chloroplastic	Chaperonin-like RbcX protein	LOC_Os03g59320	0.67	0.79	0.9	85.23	60.02	189.853	169.9	-0.505918	1.15545	0.995253	0.578039	0.80088	0.770912	-		-	-	-	COCehwD020028.1	CN01_06P014510
CN01_scaffold016575P000010	CN01_scaffold016575G000010	PS	#N/A	RCA,RCA1,RCAA,LOC103715669,RCAa,LOC103704142	#N/A	La+	1263	complete	ISS_2	IPR027417,IPR003959	Ribulose bisphosphate carboxylase/oxygenase activase, chloroplastic	rubisco activase	LOC_Os11g47970	0.87	0.91	0.82	109.897	54.63	262.37	231.94	-1.00838	1.25546	1.0776	0.776614	0.818503	0.797486	K03064|1|4e-07|54.3|smo:SELMODRAFT_157152|26S proteasome regulatory subunit T4		GO:0043231//intracellular membrane-bounded organelle	GO:0001071//nucleic acid binding transcription factor activity;GO:0032559	-	COCehwD006868.2	CN01_U02P003240
CN01_12P000720	CN01_12G000720	#N/A	#N/A	PELPK1,PELPK2,LOC103695501,PRUPE_6G111400,PRUPE_ppa017582mg	#N/A	La+	465	complete	ISS_1	#N/A	protein PELPK1-like	hydroxyproline-rich glycoprotein family protein	LOC_Os03g56930	0.34	0.91	0.65	2.56667	5.43667	134.233	7.175	1.08283	5.7087	1.48308	0.428879	0.934562	0.53739	-		-	-	-	COCehwD010701.1	CN01_12P000720
CN01_contig69338925P000010	CN01_contig69338925G000010	#N/A	#N/A	psbW,PSBW,LOC103704536,BVC80_8329g6,103983127	#N/A	La+	399	complete	ISS_1	IPR009806	photosystem II reaction center W protein, chloroplastic	photosystem II reaction center W	LOC_Os01g56680	0.55	0.83	0.9	1132.05	1449.67	2079	2459.78	0.356794	0.876959	1.1196	0.493647	0.735545	0.811587	K02721|1|4e-16|81.3|vvi:100256361|photosystem II PsbW protein		GO:0044424//intracellular part	-	-	COCehwD000354.1	COCehwD000354.1
CN01_14P007820	CN01_14G007820	ABA	MYB,SANT	CPC,TRY,ETC1,ETC3,LOC103719112,LOC104585664,LOC103717624,VIT_12s0059g02360	7	La+	207	complete	ISS_1	IPR001005,IPR015495,IPR009057,IPR017930	transcription factor CPC	CAPRICE-like MYB3	LOC_Os01g43180	0.61	0.72	0.47	420.73	756.393	762.79	1066.95	0.846242	0.858391	1.34253	0.750693	0.728871	0.840217	K09422|1|2e-12|68.9|aly:ARALYDRAFT_357563|myb proto-oncogene protein, plant		GO:0043231//intracellular membrane-bounded organelle	GO:0003676//nucleic acid binding	-	COCehwD008078.1	CN01_14P007820
CN01_06P003350	CN01_06G003350	#N/A	#N/A	RTNLB3,RTNLB2,RTNLB4,RTNLB1,LOC103722240,LOC103709009	#N/A	La+	513	fragment	ISS_3	IPR003388	putative Reticulon-like protein B2	VIRB2-interacting protein 2	LOC_Os02g16620	0.54	0.87	0.64	515.99	679.253	741.423	1147.45	0.396607	0.522954	1.15302	0.524611	0.581034	0.815832	K00861|1|4e-08|55.5|vcn:VOLCADRAFT_103251|riboflavin kinase [EC:2.7.1.26]		GO:0031410//cytoplasmic vesicle;GO:0043231//intracellular membrane-bounded organelle	-	-	COCehwD003442.1	CN01_06P003350
CN01_07P002690	CN01_07G002690	#N/A	#N/A	HIPP27,HIPP26,HIPP25,HIPP20,LOC103719593,103994394,LOC103721141,103982707	#N/A	La+	378	complete	ISS_2	IPR006121,IPR036163	Heavy metal-associated isoprenylated plant protein 27	Heavy metal transport/detoxification superfamily protein	LOC_Os04g17100	0.72	0.99	0.82	451.127	547.547	669.48	944.475	0.279449	0.569508	1.06598	0.417215	0.607772	0.800355	K07213|1|3e-07|51.6|bdi:100843688|copper chaperone		-	-	-	COCehwD004996.1	CN01_07P002690
CN01_15P006300	CN01_15G006300	#N/A	#N/A	GAPA1,GAPA2,GAPA,LOC103712351,TCM_017432,TorRG33x02_206100,LOC107935841	#N/A	La+	1404	complete	ISS_2	IPR006424,IPR020828,IPR020829,IPR020831,IPR020830,IPR036291	Glyceraldehyde-3-phosphate dehydrogenase GAPA1, chloroplastic	glyceraldehyde 3-phosphate dehydrogenase A subunit 2	LOC_Os04g38600	0.86	0.83	0.96	494.64	522.047	1054.16	1087.82	0.0777999	1.09164	1.13698	0.179158	0.798239	0.813882	K05298|1|8e-169|591|rcu:RCOM_1443660|glyceraldehyde-3-phosphate dehydrogenase (NADP+) (phosphorylating) [EC:1.2.1.13]		-	-	-	COCehwD008435.1	CN01_15P006300
CN01_02P019120	CN01_02G019120	#N/A	#N/A	Os07g0281000,Os06g0170500,At1g07360,At2g29580,LOC103714100,LOC103699574,Os07g0281000_0,103971985	#N/A	La+	885	complete	ISS_2	IPR000504,IPR012677,IPR035979,IPR039171	zinc finger CCCH domain-containing protein 49-like	CCCH-type zinc fingerfamily protein with RNA-binding domain	LOC_Os07g18050	0.72	0.93	0.56	655.333	468.073	1036.03	1481.79	-0.485494	0.66076	1.17704	0.590924	0.656538	0.819754	K12872|1|1e-88|324|osa:4342926|pre-mRNA-splicing factor RBM22/SLT11		-	-	-	COCehwD021543.1	CN01_02P019120
CN01_11P000130	CN01_11G000130	#N/A	#N/A	ndhD,Cht6,4CLL6,TPLATE,LOC103710078,103985414,POPTR_0005s21760g,MANES_18G094200	#N/A	La+	261	complete	ISS_4	IPR021899	conserved hypothetical protein	Protein of unknown function (DUF3511)	LOC_Os06g47220	0.6	0.66	0.54	407.26	448.077	654.673	1083.47	0.137795	0.684825	1.41164	0.257756	0.665674	0.847956	-		-	-	-	COCehwD025618.1	CN01_11P000130
CN01_06P004190	CN01_06G004190	#N/A	MT	MT3A,mt3-A,MET,grip24	62	La+	195	complete	ISS_1	#N/A	Metallothionein-like protein	metallothionein 3	LOC_Os01g10400	0.61	0.94	0.9	416.987	403.653	805.583	1181.05	-0.0468844	0.950033	1.50199	0.132579	0.758725	0.854766	-		-	GO:0043169//cation binding	-	COCehwD020564.1	CN01_06P004190
CN01_09P000200	CN01_09G000200	#N/A	CAEFH,CML	CML23,CML16,LOC103724093,103992069,103975247,Capn13	47	La+	510	complete	ISS_2	IPR002048,IPR011992	Calpain-13	Calcium-binding EF hand family protein	LOC_Os04g51240	0.65	0.99	0.99	300.34	387.387	574.49	685.315	0.367178	0.935685	1.19017	0.498731	0.755705	0.820192	-		-	-	-	COCehwD013245.1	CN01_09P000200
CN01_scaffold004940P000010	CN01_scaffold004940G000010	#N/A	#N/A	J,SVP,MADS22,MADS47,STMADS11-1,103968670,LOC104611910,LOC104595485	#N/A	La+	687	complete	ISS_1	IPR033896,IPR002100,IPR002487,IPR036879	MADS-box protein JOINTLESS	K-box region and MADS-box transcription factor family protein	LOC_Os02g52340	0.63	1	1	208.85	346.253	334.32	488.73	0.729361	0.678763	1.22657	0.708659	0.662723	0.823999	K09264|1|3e-40|163|smo:SELMODRAFT_450937|MADS-box transcription factor, plant		GO:0043231//intracellular membrane-bounded organelle	GO:0003677//DNA binding;GO:0001071//nucleic acid binding transcription factor activity	GO:0006351//transcription, DNA-dependent;GO:0032501//multicellular organismal process;GO:0006281//DNA repair	COCehwD019638.1	CN01_U02P024690
CN01_13P000830	CN01_13G000830	#N/A	#N/A	EX2,EX1,ACMD2_08085,ACMD2_24909,EX1_4	#N/A	La+	2058	complete	ISS_1	IPR021894	protein EXECUTER 2, chloroplastic	Protein of unknown function (DUF3506)	LOC_Os01g01790	0.55	0.9	0.91	237.387	255.73	448.477	532.395	0.107383	0.917794	1.16526	0.215702	0.747652	0.816542	-		GO:0034357;GO:0043231//intracellular membrane-bounded organelle	-	GO:0000302//response to reactive oxygen species	COCehwD009172.2	CN01_13P000830
CN01_09P009460	CN01_09G009460	#N/A	#N/A	PGR5,CCC1,UNG,ABCG2,LOC103706946,LOC103711843,104000434,103989933	#N/A	La+	381	complete	ISS_1	IPR037497	protein PROTON GRADIENT REGULATION 5, chloroplastic	proton gradient regulation 5	LOC_Os08g45190	0.67	0.96	0.93	265.963	235.157	445.703	596.38	-0.177605	0.744856	1.165	0.307992	0.687985	0.816969	-		GO:0009534//chloroplast thylakoid	-	GO:0006950//response to stress;GO:0009642//response to light intensity;GO:0009767//photosynthetic electron transport chain	COCehwD019210.1	CN01_09P009460
CN01_06P020150	CN01_06G020150	#N/A	#N/A	RH48,RH33,At2g30600/At2g30610,At3g49480,LOC104246894,T459_18803	#N/A	La+	243	complete	ISS_4	#N/A	conserved hypothetical protein	#N/A	LOC_Os04g53180	0.4	0.8	0.42	263.747	232.743	512.44	773.295	-0.180413	0.95823	1.55187	0.308005	0.75927	0.860367	-		-	-	GO:0009725//response to hormone stimulus	COCehwD007614.1	CN01_06P020150
CN01_07P006310	CN01_07G006310	ABA	AUX,SAUR	SAUR32,SAUR36,ARG7,LOC103708499,LOC103712188,LOC103717517	22	La+	300	complete	ISS_2	IPR003676	auxin-responsive protein SAUR32-like	SAUR-like auxin-responsive protein family	LOC_Os10g36703	0.58	0.95	0.82	427.737	224.06	785.28	909.065	-0.932838	0.876484	1.08766	0.772807	0.734111	0.805893	K14488|1|2e-23|105|bdi:100827904|SAUR family protein		GO:0043231//intracellular membrane-bounded organelle	GO:0005515//protein binding	GO:0009755//hormone-mediated signaling pathway	COCehwD008085.1	CN01_07P006310
CN01_09P008820	CN01_09G008820	ABA	CBS	CBSX2,CBSX1,SNF4,CBSDUFCH1,LOC103714891,LOC103723298,MA16_Dca018569	#N/A	La+	729	complete	ISS_2	IPR000644	CBS domain-containing protein DDB_G0289609	Cystathionine beta-synthase (CBS) family protein	LOC_Os02g57280	0.58	0.8	0.86	228.9	188.51	358.813	601.105	-0.280076	0.648516	1.3929	0.413359	0.647044	0.844347	-		GO:0043231//intracellular membrane-bounded organelle	-	-	COCehwD005188.1	CN01_09P008820
CN01_13P004820	CN01_13G004820	#N/A	#N/A	PSRP6,TCM_047070,BnaC09g40070D,BnaA04g07180D	#N/A	La+	324	complete	ISS_2	IPR020526	50S ribosomal protein 6, chloroplastic	plastid-specific 50S ribosomal protein 6	LOC_Os11g34940	0.67	0.63	0.53	156.883	181.95	317.74	340.475	0.21385	1.01815	1.11786	0.339762	0.775997	0.806811	-		-	-	-	COCehwD005080.1	CN01_13P004820
CN01_01P019990	CN01_01G019990	#N/A	#N/A	FD2,SEND33,AP1,LOC103702636,LOC103713909,103983643,LOC104586976	#N/A	La+	462	complete	ISS_2	IPR001041,IPR012675,IPR006058,IPR036010,IPR010241	Ferredoxin-2, chloroplastic	2Fe-2S ferredoxin-like superfamily protein	LOC_Os08g01380	0.57	0.95	0.99	243.47	179.717	437.483	534.39	-0.43802	0.845484	1.13415	0.550939	0.723962	0.810534	K02639|1|2e-45|179|vvi:100249080|ferredoxin		-	-	-	COCehwD022138.1	CN01_01P019990
CN01_scaffold000732P000130	CN01_scaffold000732G000130	#N/A	#N/A	MLO1,MLO15,MLO13,MLO5,LOC103716064,LOC103723666,MLO1_0,MLO	#N/A	La+	1476	complete	ISS_2	IPR004326	MLO-like protein 1	Seven transmembrane MLO family protein	LOC_Os01g66510	0.64	0.88	0.9	90.1033	160.537	182.997	195.585	0.83325	1.02216	1.11814	0.732794	0.770805	0.802065	K08472|1|1e-157|554|osa:4324900|mlo protein		GO:0031410//cytoplasmic vesicle	-	-	COCehwD024462.4	CN01_U02P000400
CN01_06P004870	CN01_06G004870	ABA	MYB,TF	MYBS3,KUA1,At5g61620,MYBS2,LOC103714322,LOC103711233,LOC103713455,ACMD2_11316	7	La+	804	complete	ISS_1	IPR009057,IPR006447,IPR001005,IPR001878,IPR017930	transcription factor MYBS3	myb-like transcription factor family protein	LOC_Os01g09640	0.48	1	0.94	293.847	152.13	593.12	698.365	-0.949759	1.01326	1.24892	0.77498	0.777031	0.82889	-		-	GO:0046872//metal ion binding;GO:0003676//nucleic acid binding	-	COCehwD026771.1	CN01_06P004870
CN01_11P000630	CN01_11G000630	SOS	NCE,CAX	CAX1a,CAX3,CAX1,CAX1b,LOC103710130,LOC103722627	49	La+	1353	complete	ISS_1	IPR004798,IPR004837,IPR004713	vacuolar cation/proton exchanger 1a	cation exchanger 3	LOC_Os01g37690	0.71	0.96	0.98	127.863	132.777	223.037	278.89	0.054399	0.802678	1.12509	0.130916	0.703781	0.806644	K07300|1|1e-149|528|pop:POPTR_653119|Ca2+:H+ antiporter		GO:0016020//membrane	-	GO:0006810//transport	COCehwD026230.1	CN01_11P000630
CN01_03P008590	CN01_03G008590	#N/A	#N/A	RBL9,RBL10,KOM,RBL2,LOC103721405,gluP_17	#N/A	La+	2235	modules	ISS_3	IPR035952,IPR022764	putative RHOMBOID-like protein 9, chloroplastic	Rhomboid-related intramembrane serine protease family protein	LOC_Os02g22100	0.34	0.24	0.58	155.883	125.763	250.81	334.48	-0.309755	0.686128	1.10145	0.438308	0.664812	0.804005	-		GO:0031224//intrinsic to membrane	GO:0004175//endopeptidase activity	-	COCehwD023745.2	CN01_03P008590
CN01_10P002610	CN01_10G002610	#N/A	#N/A	At3g50808,TCX3,DES1,IP5P12,LOC103704701,103985321,LOC103711777,Vigan.10G112100	#N/A	La+	711	modules	ISS_4	IPR006734	conserved hypothetical protein	PLATZ transcription factor family protein	LOC_Os04g50120	0.72	1	1	113.607	124.003	159.197	330.925	0.126331	0.486763	1.54246	0.239485	0.549815	0.855924	-		-	-	-	COCehwD017282.1	CN01_10P002610
CN01_06P008200	CN01_06G008200	ABA	MYB,SANT	MYBS1,SRM1,DIVARICATA,LOC103697641	#N/A	La+	864	complete	ISS_1	IPR009057,IPR001005,IPR017930,IPR006447,IPR017884	transcription factor MYBS1	Duplicated homeodomain-like superfamily protein	LOC_Os01g34060	0.58	0.93	0.94	106.523	117.193	169.807	288.095	0.137721	0.672724	1.43538	0.25128	0.651174	0.845369	-		-	-	-	COCehwD015226.1	CN01_06P008200
CN01_14P008630	CN01_14G008630	#N/A	#N/A	QHS1,CIP111,HIPP22,ACMD2_00654,LOC104246894,ACMD2_25699	#N/A	La+	243	complete	ISS_4	#N/A	conserved hypothetical protein	#N/A	LOC_Os04g53180	0.37	0.8	0.42	95.8933	111.48	131.047	240.12	0.217282	0.450578	1.32425	0.34439	0.519698	0.830809	-		-	-	GO:0009725//response to hormone stimulus	COCehwD020038.1	CN01_14P008630
CN01_02P009970	CN01_02G009970	#N/A	#N/A	BIC1,BIC2,Os09g0247700,YUC6,LOC103703226,LOC103705767,103968354,COLO4_29740	#N/A	La+	531	modules	ISS_3	IPR040374	putative protein BIC1-like	#N/A	LOC_Os04g33610	0.54	0.44	0.35	57.4967	104.653	127.52	149.92	0.864068	1.14917	1.38264	0.732408	0.793075	0.832207	-		-	-	GO:0009628//response to abiotic stimulus	COCehwD010212.1	CN01_02P009970
CN01_contig69414349P000010	CN01_contig69414349G000010	#N/A	#N/A	PSY,PSY1,LOC101513117,ACMD2_03834,LOC103723585	#N/A	La+	600	fragment	ISS_3	IPR033904,IPR008949,IPR019845	putative Phytoene synthase, chloroplastic	PHYTOENE SYNTHASE	LOC_Os06g51290	0.83	0.95	0.45	137.86	99.1967	281.733	330.45	-0.47484	1.03113	1.26123	0.563961	0.776969	0.826523	K02291|1|1e-92|336|pop:POPTR_1111208|phytoene synthase [EC:2.5.1.32]		GO:0009536//plastid	GO:0004337//geranyltranstransferase activity	GO:0016109	COCehwD000484.1	CN01_U03P018960
CN01_14P007660	CN01_14G007660	#N/A	#N/A	RBP45,RBP45B,RBP45A,RBP45C,LOC103709195,ACMD2_27133,ACMD2_00702	#N/A	La+	870	complete	ISS_2	IPR000504,IPR035979,IPR012677	Polyadenylate-binding protein RBP45	RNA-binding (RRM/RBD/RNP motifs) family protein	LOC_Os03g37270	0.62	0.86	0.6	58.9467	98.0467	132.973	148.585	0.734058	1.17365	1.33381	0.68867	0.796908	0.826554	K13201|1|3e-21|100|smo:SELMODRAFT_44478|nucleolysin TIA-1/TIAR		-	-	-	COCehwD021328.1	CN01_14P007660
CN01_02P007300	CN01_02G007300	#N/A	#N/A	SULTR1;2,SULTR1;3,ST2,ST1,LOC103700803,LOC103713322	#N/A	La+	1977	complete	ISS_1	IPR036513,IPR002645,IPR018045,IPR001902,IPR011547	sulfate transporter 1.2	sulfate transporter 1,3	LOC_Os03g09970	0.75	1	1	133.37	91.5067	221.38	319.09	-0.543485	0.731091	1.25853	0.607299	0.679167	0.826241	-		GO:0031224//intrinsic to membrane	GO:0015291//secondary active transmembrane transporter activity	GO:0015698//inorganic anion transport	COCehwD023285.1	CN01_02P007300
CN01_04P005900	CN01_04G005900	ABA	AMPK-beta-subunit,SnRK,ASC	KINB1,KINB2,KINB3,FLO6,LOC103722961,LOC103705020,KINB1_2	24	La+	603	complete	ISS_1	IPR006828,IPR013783,IPR032640,IPR037256,IPR014756	SNF1-related protein kinase regulatory subunit beta-1	5\'-AMP-activated protein kinase beta-2 subunit protein	LOC_Os03g20340	0.63	0.99	0.67	60.6833	79.24	119.43	149.13	0.384929	0.976793	1.2972	0.483956	0.7483	0.822632	K07199|1|1e-76|283|bdi:100837253|5'-AMP-activated protein kinase, regulatory beta subunit		-	-	-	COCehwD026519.1	CN01_04P005900
CN01_06P017450	CN01_06G017450	#N/A	KIN	CKA4,CKA1,CKA2,HD6,TanjilG_22226,CRG98_008298,TCM_000773,SOVF_175810	#N/A	La+	561	fragment	ISS_3	IPR000719,IPR011009	putative Casein kinase II subunit alpha-4, chloroplastic	casein kinase alpha 1	LOC_Os03g55389	0.89	0.99	0.99	47.8767	76.4333	92.26	113.115	0.674879	0.946383	1.2404	0.656748	0.735131	0.809762	K03097|1|9e-104|373|pop:POPTR_1073670|casein kinase II subunit alpha [EC:2.7.11.1]		-	GO:0004674//protein serine/threonine kinase activity;GO:0032559	GO:0006464//cellular protein modification process	COCehwD007751.1	CN01_06P017450
CN01_08P002430	CN01_08G002430	#N/A	#N/A	KTI2,ABCC11,ABCB27,RLP13,LOC103706782,LOC103708610,LOC104611082	#N/A	La+	333	fragment	ISS_4	#N/A	conserved hypothetical protein	#N/A	LOC_Os09g27610	0.55	0.91	0.25	64.8733	74.9967	141.69	157.35	0.209201	1.12704	1.27828	0.325884	0.79182	0.820745	-		GO:0009536//plastid	-	-	COCehwD010381.1	CN01_08P002430
CN01_13P000790	CN01_13G000790	#N/A	#N/A	PCBER,TP7,LOC103711540,LOC103711541,ACMD2_09955,ACMD2_09957	#N/A	La+	930	complete	ISS_1	IPR008030,IPR036291	isoflavone reductase-like protein	NmrA-like negative transcriptional regulator family protein	LOC_Os06g27770	0.77	0.99	0.98	33.9467	73.3	38.2367	135.84	1.11054	0.171687	2.00057	0.784843	0.247942	0.878807	K00224|1|1e-118|424|aly:ARALYDRAFT_476671|[EC:1.3.1.-];K13081|3|3e-67|253|vvi:100233112|leucoanthocyanidin reductase [EC:1.17.1.3]		-	-	-	COCehwD022278.1	CN01_13P000790
CN01_03P001530	CN01_03G001530	#N/A	#N/A	KIN5A,GP1,RECQL4B,SMXL4,LOC103696249,102714273	#N/A	La+	840	complete	ISS_4	#N/A	conserved hypothetical protein	#N/A	LOC_Os03g53300	0.67	1	1	137.96	72.3867	279.93	315.995	-0.930454	1.02082	1.19565	0.760722	0.775031	0.817887	-		GO:0031224//intrinsic to membrane	-	GO:0006810//transport	COCehwD025150.2	CN01_03P001530
CN01_02P011600	CN01_02G011600	ABA.bZIP	TF,bZIP	At4g06598,BZIP34,BZIP61,BZIP06,LOC103711051,LOC103704829,ACMD2_05948	8	La+	1410	modules	ISS_4	#N/A	conserved hypothetical protein	Basic-leucine zipper (bZIP) transcription factor family protein	LOC_Os11g11100	0.56	0.62	0.82	87.7933	70.8367	122.62	210.84	-0.309615	0.482011	1.26397	0.427182	0.537335	0.822685	-		-	GO:0005488//binding	-	COCehwD027027.1	CN01_02P011600
CN01_07P003780	CN01_07G003780	ABA.bZIP	#N/A	WIN8,LOC103711759,103982584,MA16_Dca020290,MA16_Dca014207	#N/A	La+	603	fragment	ISS_4	#N/A	conserved hypothetical protein	Tetratricopeptide repeat (TPR)-like superfamily protein	LOC_Os06g40440	0.6	0.17	0.12	78.9633	66.2733	76.4167	223.77	-0.252754	-0.0472956	1.50276	0.368925	0.122271	0.847518	-		-	-	-	COCehwD001282.1	CN01_07P003780
CN01_15P001640	CN01_15G001640	ABA.bZIP	#N/A	At5g28300,GT-3A,GT-4,GT-1,LOC103701210,LOC103703173,LOC104586241	#N/A	La+	1263	complete	ISS_4	#N/A	conserved hypothetical protein	sequence-specific DNA binding transcription factors	LOC_Os12g06640	0.56	0.92	0.91	32.6567	65.1033	32.5167	108.51	0.995354	-0.00619817	1.73238	0.755177	0.0747597	0.860857	-		-	-	-	COCehwD009363.1	CN01_15P001640
CN01_02P010270	CN01_02G010270	#N/A	#N/A	DGD1,DGD2,LOC103714289,LOC103703146,ACMD2_07165	#N/A	La+	726	fragment	ISS_3	IPR001296	putative Digalactosyldiacylglycerol synthase 1, chloroplastic	UDP-Glycosyltransferase superfamily protein	LOC_Os11g05990	0.78	1	0.33	93.0233	63.59	158.883	230.97	-0.548793	0.772303	1.31204	0.603843	0.689647	0.829161	K09480|1|8e-117|417|pop:POPTR_835465|digalactosyldiacylglycerol synthase [EC:2.4.1.241]		GO:0009527//plastid outer membrane;GO:0030659//cytoplasmic vesicle membrane	GO:0035250//UDP-galactosyltransferase activity	GO:0044403//symbiosis, encompassing mutualism through parasitism;GO:0008152//metabolic process	COCehwD000622.1	CN01_02P010270
CN01_07P013270	CN01_07G013270	#N/A	#N/A	ccsA,SHM7,AO1,ETR2,LOC103699947,PanWU01x14_275060,TorRG33x02_101620,L484_000753	#N/A	La+	390	modules	ISS_3	#N/A	putative Bric-a-brac protein	TRICHOME BIREFRINGENCE-LIKE 7	LOC_Os01g65800	0.35	0.43	0.13	70.0633	62.92	145.49	198.81	-0.155141	1.05419	1.50466	0.268924	0.772618	0.846423	-		-	-	-	COCehwD026639.1	CN01_07P013270
CN01_11P008800	CN01_11G008800	#N/A	#N/A	At2g48060/At2g48040/At2g48050,ABF4,EDR2,At2g39750,LOC103710033,LOC103719167,103999264	#N/A	La+	444	complete	ISS_4	IPR025322	conserved hypothetical protein	#N/A	LOC_Os06g12960	0.42	0.99	0.82	66.66	60.8167	114.197	158.8	-0.132355	0.776627	1.25232	0.231663	0.686124	0.818252	-		-	-	-	COCehwD021444.1	CN01_11P008800
CN01_15P004300	CN01_15G004300	#N/A	#N/A	unknown_gene	#N/A	La+	168	missing_functional_completeness	ISS_5	#N/A	hypothetical protein	peroxin 3	LOC_Os09g14510	0.29	0.91	0.19	37.33	60.38	85.5433	100.165	0.693735	1.19632	1.42397	0.653023	0.789717	0.829234	-		-	-	-	COCehwD012840.1	CN01_15P004300
CN01_16P001280	CN01_16G001280	#N/A	#N/A	AMI1,OEP64,TOC64,LOC103698414	#N/A	La+	171	fragment	ISS_3	IPR036928	putative Amidase 1	amidase 1	LOC_Os04g02754	0.65	0.91	0.12	42.01	59.23	75.3033	176.035	0.495595	0.841981	2.06706	0.554105	0.692363	0.885378	-		-	-	-	COCehwD018060.1	CN01_16P001280
CN01_14P011740	CN01_14G011740	ABA.bZIP	TF,bZIP	RISBZ2,CPRF2,BZIP63,RISBZ1,LOC103704524,ACMD2_16136	#N/A	La+	1740	modules	ISS_3	IPR004827,IPR020983	putative bZIP transcription factor RISBZ2	bZIP transcription factor family protein	LOC_Os07g08420	0.39	0.75	0.99	28.4833	54.1367	46.5167	102.24	0.926488	0.70763	1.84377	0.726338	0.621141	0.865113	-		-	-	-	COCehwD004676.1	CN01_14P011740
CN01_09P003010	CN01_09G003010	#N/A	#N/A	NPF6.3,NPF6.2,NPF6.4,NPF8.1,LOC103720688,LOC103710744,SORBI_3007G044300,LOC101770740	#N/A	La+	1812	complete	ISS_1	IPR036259,IPR000109,IPR018456	protein NRT1/ PTR FAMILY 6.3	nitrate transporter 1.1	LOC_Os08g05910	0.76	1	1	56.86	51.4433	121.067	171.78	-0.14443	1.09032	1.59508	0.240105	0.781643	0.857103	K14638|1|3e-121|434|ppp:PHYPADRAFT_189464|solute carrier family 15 (peptide/histidine transporter), member 3/4		GO:0016020//membrane	-	GO:0006810//transport	COCehwD009773.1	CN01_09P003010
CN01_01P016680	CN01_01G016680	ABA	F-box	At2g32560,At2g26850,At2g41170,PP2A15,LOC103713284,103979466,LOC103710333	27	La+	1197	complete	ISS_1	IPR036047,IPR001810	F-box protein At2g32560	F-box family protein	LOC_Os01g17390	0.69	0.78	0.77	59.7333	50.44	106.727	157.785	-0.243968	0.837313	1.40135	0.349777	0.703719	0.835638	-		GO:0031410//cytoplasmic vesicle	GO:0005515//protein binding;GO:0032559	-	COCehwD026914.1	CN01_01P016680
CN01_11P007190	CN01_11G007190	#N/A	#N/A	FAD2-2,FAD12,FAD2,DES2,LOC103713931,LOC103723899	#N/A	La+	1176	complete	ISS_1	IPR021863,IPR005804	omega-6 fatty acid desaturase, endoplasmic reticulum isozyme 2	fatty acid desaturase 2	LOC_Os02g48560	0.77	1	1	66.9767	49.6167	111.067	177.405	-0.432834	0.729695	1.40532	0.515492	0.667501	0.838329	K10256|1|1e-170|597|osa:4330523|omega-6 fatty acid desaturase (delta-12 desaturase) [EC:1.14.19.-]		GO:0043231//intracellular membrane-bounded organelle;GO:0044425//membrane part	GO:0016705//oxidoreductase activity, acting on paired donors, with incorporation or reduction of molecular oxygen	GO:0006629//lipid metabolic process	COCehwD019021.1	CN01_11P007190
CN01_12P003350	CN01_12G003350	#N/A	#N/A	PLSC,LPAT1,LOC103719321,AXF42_Ash017009,103972439	#N/A	La+	942	complete	ISS_1	IPR002123,IPR004552	1-acyl-sn-glycerol-3-phosphate acyltransferase	Phospholipid/glycerol acyltransferase family protein	LOC_Os04g53370	0.82	0.79	0.85	71.84	48.74	124.16	167.545	-0.559681	0.789341	1.22169	0.599236	0.691274	0.814278	K00655|1|7e-17|86.3|vvi:100248458|1-acyl-sn-glycerol-3-phosphate acyltransferase [EC:2.3.1.51]		GO:0031224//intrinsic to membrane	GO:0016411//acylglycerol O-acyltransferase activity	GO:0006644//phospholipid metabolic process	COCehwD024643.2	CN01_12P003350
CN01_scaffold003275P000030	CN01_scaffold003275G000030	#N/A	#N/A	MOM1,MAKR1,FTSH,LOC103724103,LOC103707877,LOC103721213,Vigan.01G544600	#N/A	La+	924	complete	ISS_2	#N/A	translation initiation factor IF-2-like	#N/A	LOC_Os01g69290	0.34	0.97	0.92	35.8733	47.1667	77.0667	103.795	0.394856	1.1032	1.53275	0.467147	0.771315	0.840551	-		-	-	-	COCehwD014628.1	CN01_U02P005750
CN01_contig69204476P000010	CN01_contig69204476G000010	#N/A	#N/A	Os10g0467600,ARF17,LOC103695730,LOC103695641,LOC103704518	#N/A	La+	1134	complete	ISS_4	IPR006502	conserved hypothetical protein	Protein of unknown function (DUF506)	LOC_Os03g06680	0.55	0.7	0.86	52.4067	46.2733	103.023	122.225	-0.179569	0.975149	1.22172	0.283878	0.744674	0.808844	-		-	-	-	COCehwD000203.1	COCehwD000203.1
CN01_contig68744414P000010	CN01_contig68744414G000010	#N/A	#N/A	unknown_gene	#N/A	La+	171	missing_functional_completeness	ISS_5	#N/A	hypothetical protein	#N/A	#N/A	#N/A	#N/A	#N/A	35.8933	45.9333	68.5567	101.22	0.355826	0.933581	1.49571	0.441757	0.719687	0.835524	-		-	-	-	COCehwD000032.1	COCehwD000032.1
CN01_05P002890	CN01_05G002890	#N/A	#N/A	CYP71D1V2,ELF3-2,FLS1,ELF3,LOC103705278,LOC103719786,LOC103709213	#N/A	La+	588	complete	ISS_4	#N/A	conserved hypothetical protein	#N/A	LOC_Os12g39100	0.36	0.99	0.92	42.1333	45.77	89.2733	111.975	0.11944	1.08327	1.41014	0.20857	0.77075	0.830611	-		-	-	-	COCehwD010887.1	CN01_05P002890
CN01_14P008020	CN01_14G008020	#N/A	#N/A	VIT_19s0090g00570,POPTRDRAFT_833824,OsI_06397,Os02g0219900,LOC103720492,103970612,ACMD2_14362,103982095	#N/A	La+	552	complete	ISS_1	IPR006702,IPR006459	CASP-like protein 2D1	Uncharacterised protein family (UPF0497)	LOC_Os02g12760	0.53	0.9	0.85	55.4433	44.73	85.5967	129.215	-0.309771	0.626541	1.22069	0.410235	0.615018	0.809981	-		-	-	-	COCehwD025922.1	CN01_14P008020
CN01_13P003080	CN01_13G003080	#N/A	#N/A	CRY1,CRY2,PHR1,UVR3,LOC103707915,LOC103716108,103986709	#N/A	La+	2058	complete	ISS_1	IPR002081,IPR036155,IPR006050,IPR020978,IPR014134,IPR018394,IPR036134,IPR014729,IPR005101	cryptochrome-1	cryptochrome 1	LOC_Os04g37920	0.74	0.98	0.97	68.2433	44.39	151.843	168.725	-0.620453	1.15382	1.30591	0.628688	0.796467	0.825761	K12118|1|0.0|1030|pop:POPTR_559103|cryptochrome 1		-	-	-	COCehwD010993.1	CN01_13P003080
CN01_11P012370	CN01_11G012370	#N/A	#N/A	SAMDC,LOC103710458,103985356,LOC103720711,OsJ_07492	#N/A	La+	1209	complete	ISS_1	IPR018166,IPR001985,IPR016067	S-adenosylmethionine decarboxylase proenzyme	Adenosylmethionine decarboxylase family protein	LOC_Os02g39795	0.73	0.98	0.7	59.6967	41.8567	109.53	190.62	-0.512193	0.875604	1.67498	0.563099	0.715144	0.865957	K01611|1|2e-158|556|osa:4329955|S-adenosylmethionine decarboxylase [EC:4.1.1.50]		-	GO:0016831//carboxy-lyase activity	GO:0006596//polyamine biosynthetic process	COCehwD009231.1	CN01_11P012370
CN01_06P014770	CN01_06G014770	#N/A	#N/A	PP2A4,PP2A1,PP2A5,LOC103714436,LOC103705406	#N/A	La+	483	complete	ISS_2	IPR025886	protein PHLOEM PROTEIN 2-LIKE A1-like	phloem protein 2-A1	LOC_Os01g06500	0.37	0.93	0.62	37.67	39.59	78.5733	119.65	0.07172	1.06062	1.66733	0.14745	0.758594	0.859387	-		-	-	-	COCehwD020002.2	CN01_06P014770
CN01_11P008300	CN01_11G008300	#N/A	TF,AP2/ERF	ERF3,ERF11,ERF7,LOC103706451	10	La+	663	complete	ISS_1	IPR001471,IPR016177,IPR036955	ethylene-responsive transcription factor 3	ethylene responsive element binding factor 3	LOC_Os04g57340	0.52	0.88	0.93	66.4667	32.4	121.9	174.94	-1.03664	0.874995	1.39616	0.765716	0.714868	0.837119	K09286|1|6e-17|85.5|ath:AT1G50640|EREBP-like factor		GO:0043231//intracellular membrane-bounded organelle	GO:0005488//binding;GO:0001071//nucleic acid binding transcription factor activity	GO:0006351//transcription, DNA-dependent;GO:0009873//ethylene mediated signaling pathway	COCehwD021394.1	CN01_11P008300
CN01_scaffold001324P000040	CN01_scaffold001324G000040	#N/A	#N/A	rpoC2,JAL43,LOC103697907,LOC103712509,CFOL_v3_25864	#N/A	La+	432	fragment	ISS_3	IPR012881	putative DUF1685 domain-containing protein	Protein of unknown function (DUF1685)	LOC_Os02g52770	0.52	0.9	0.74	39.5667	23.1333	65.92	109.145	-0.774312	0.736431	1.46389	0.653313	0.652932	0.834053	-		-	-	-	COCehwD004213.1	CN01_U01P004650
CN01_10P005660	CN01_10G005660	#N/A	#N/A	ACS12,ACS10,ACS8,ACS9,LOC103716889,LOC103697389	#N/A	La+	1518	complete	ISS_2	IPR015424,IPR015422,IPR004839,IPR004838,IPR015421	1-aminocyclopropane-1-carboxylate synthase 8	1-amino-cyclopropane-1-carboxylate synthase 12	LOC_Os06g03990	0.64	1	0.94	34.5367	15.3533	62.2467	115.11	-1.16958	0.849868	1.73681	0.750086	0.686461	0.862526	K14270|1|0.0|640|vvi:100251582|aminotransferase		-	GO:0016769//transferase activity, transferring nitrogenous groups;GO:0048037//cofactor binding;GO:0016846//carbon-sulfur lyase activity	GO:0008652//cellular amino acid biosynthetic process	COCehwD023051.1	CN01_10P005660
CN01_02P004690	CN01_02G004690	#N/A	#N/A	CAB40,CAB91R,CAB21,LOC103699375,LOC103703341,MBP_91N22.12,103975954	#N/A	CHE	801	complete	ISS_1	IPR022796,IPR023329,IPR001344	Chlorophyll a-b binding protein, chloroplastic	photosystem II light harvesting complex gene B1B2	LOC_Os01g52240	0.9	0.99	0.99	9173.9	9431.46	10412.5	8060.04	0.0399454	0.18271	-0.186748	0.120156	0.290393	0.306435	K08912|1|3e-145|512|vvi:100245214|light-harvesting complex II chlorophyll a/b binding protein 1		GO:0009536//plastid	-	GO:0006091//generation of precursor metabolites and energy	COCehwD012535.1	CN01_02P004690
CN01_contig69106434P000010	CN01_contig69106434G000010	#N/A	#N/A	LHCB4.2,LHCB4.1,LHCB4.3,LHC,glysoja_038819,L195_g048781,LHCB4.2_0,AMTR_s00029p00239610	#N/A	CHE	315	complete	ISS_2	IPR001344,IPR023329,IPR022796	Chlorophyll a-b binding protein, chloroplastic	light harvesting complex photosystem II	LOC_Os07g37240	0.92	0.99	0.36	6277.51	8278.8	7364.53	6186.6	0.39923	0.230401	-0.0210461	0.526273	0.342683	0.0820713	K08915|1|5e-42|167|mtr:MTR_4g015570|light-harvesting complex II chlorophyll a/b binding protein 4		GO:0009536//plastid	-	GO:0006091//generation of precursor metabolites and energy	COCehwD000122.1	COCehwD000122.1
CN01_scaffold013743P000020	CN01_scaffold013743G000020	#N/A	#N/A	PSBR,LOC103717920,PsbR,LOC103713825,LOC104588920	#N/A	CHE	468	complete	ISS_2	IPR006814	Photosystem II 10 kDa polypeptide, chloroplastic	photosystem II subunit R	LOC_Os07g05365	0.68	0.88	0.99	4722.09	5471	8006.76	7844.66	0.212379	0.761794	0.732287	0.345308	0.699327	0.697069	K03541|1|4e-45|178|vvi:100243967|photosystem II 10kDa protein		-	-	-	COCehwD004808.1	CN01_U03P004080
CN01_14P004710	CN01_14G004710	#N/A	#N/A	CAB21,CAB40,CAB91R,LOC103714976,LOC103703341,LOC103699375,EUGRSUZ_D00319	#N/A	CHE	795	complete	ISS_1	IPR023329,IPR022796,IPR001344	Chlorophyll a-b binding protein 21, chloroplastic	photosystem II light harvesting complex gene B1B2	LOC_Os01g52240	0.89	0.99	0.99	6531.36	4823.64	7051.54	5968.94	-0.43726	0.110556	-0.129909	0.557526	0.212758	0.235753	K08912|1|3e-145|512|rcu:RCOM_0633890|light-harvesting complex II chlorophyll a/b binding protein 1		GO:0009536//plastid	-	GO:0006091//generation of precursor metabolites and energy	COCehwD014019.1	CN01_14P004710
CN01_07P008700	CN01_07G008700	#N/A	#N/A	ANS,LDOX,ANT17,LOC103696959,LOC103702795,103983889	#N/A	CHE	1083	complete	ISS_1	IPR026992,IPR005123,IPR027443	leucoanthocyanidin dioxygenase	leucoanthocyanidin dioxygenase	LOC_Os01g27490	0.56	0.95	0.94	2555.92	4354.64	4023.87	1865.27	0.768714	0.654742	-0.45446	0.727386	0.651436	0.544754	K05277|1|1e-143|507|vvi:100233142|leucoanthocyanidin dioxygenase [EC:1.14.11.19]		-	GO:0016706//oxidoreductase activity, acting on paired donors, with incorporation or reduction of molecular oxygen, 2-oxoglutarate as one donor, and incorporation of one atom each of oxygen into both donors;GO:0019842//vitamin binding;GO:0043169//cation binding;GO:0016701//oxidoreductase activity, acting on single donors with incorporation of molecular oxygen	GO:0009699//phenylpropanoid biosynthetic process	COCehwD013766.1	CN01_07P008700
CN01_02P014270	CN01_02G014270	#N/A	#N/A	CAB7,LHCA2,LHCA6,LOC103718326,CDL15_Pgr009856,LOC103715849,KK1_011300	#N/A	CHE	474	fragment	ISS_3	IPR001344,IPR023329,IPR022796	putative Chlorophyll a-b binding protein, chloroplastic	photosystem I light harvesting complex gene 2	LOC_Os07g38960	0.93	0.97	0.58	1991.39	2764.76	3912.99	3138.32	0.473378	0.974496	0.656219	0.578343	0.764448	0.668043	K08908|1|3e-86|315|gmx:100784089|light-harvesting complex I chlorophyll a/b binding protein 2		GO:0009521;GO:0031224//intrinsic to membrane;GO:0009534//chloroplast thylakoid	GO:0046906//tetrapyrrole binding;GO:0043169//cation binding	GO:0006464//cellular protein modification process;GO:0006091//generation of precursor metabolites and energy	COCehwD018460.1	CN01_02P014270
CN01_12P003540	CN01_12G003540	#N/A	#N/A	UBQ11,UBQ3,UBQ14	#N/A	CHE	690	complete	ISS_1	IPR019956,IPR000626,IPR029071,IPR019954	Polyubiquitin 11	polyubiquitin 10	LOC_Os06g46770	1	1	0.75	1600.04	2614.35	2144.11	1188.67	0.708343	0.42227	-0.428763	0.705217	0.512535	0.529088	K08770|1|6e-125|444|bdi:100831055|ubiquitin C		GO:0043231//intracellular membrane-bounded organelle	-	-	COCehwD024624.1	CN01_12P003540
CN01_scaffold017721P000020	CN01_scaffold017721G000020	#N/A	#N/A	AN3,FHT,F3H,LOC103697163,LOC103708217,103992006	#N/A	CHE	1116	complete	ISS_1	IPR026992,IPR005123,IPR027443	naringenin,2-oxoglutarate 3-dioxygenase	flavanone 3-hydroxylase	LOC_Os04g56700.1	0.73	1	1	2420.53	2434.34	3653.66	2242.7	0.00820573	0.594021	-0.110086	0.0776808	0.623147	0.211806	K00475|1|3e-166|582|vvi:100253950|naringenin 3-dioxygenase [EC:1.14.11.9]		-	-	-	COCehwD007559.1	CN01_U03P001760
CN01_scaffold028365P000020	CN01_scaffold028365G000020	#N/A	#N/A	TCTP,LOC107894847,F383_11288,B456_007G300300,GOBAR_DD12965	#N/A	CHE	690	complete	ISS_2	IPR018103,IPR018105,IPR011323,IPR034737,IPR011057	Translationally-controlled tumor protein	translationally controlled tumor protein	LOC_Os11g43900.1	0.64	1	0.99	1892.8	2392.34	2486	2698.57	0.337898	0.393302	0.511673	0.476721	0.487831	0.586254	-		GO:0044424//intracellular part	-	-	COCehwD013041.2	CN01_U02P015520
CN01_07P009220	CN01_07G009220	#N/A	#N/A	PSAEA,PSAE,PSAE2,PSAE-1,100283327,103982765,ACMD2_14624	#N/A	CHE	378	complete	ISS_1	IPR003375,IPR008990	photosystem I reaction center subunit IV B, chloroplastic	photosystem I subunit E-2	LOC_Os07g25430	0.93	0.53	0.44	1985.11	2367.48	3346.84	3399.93	0.254136	0.753583	0.776286	0.388887	0.695438	0.714894	K02693|1|9e-30|126|rcu:RCOM_1723530|photosystem I subunit IV		GO:0043231//intracellular membrane-bounded organelle;GO:0009522//photosystem I	-	GO:0044237//cellular metabolic process	COCehwD013818.2	CN01_07P009220
CN01_06P010140	CN01_06G010140	#N/A	#N/A	CAB13,LHCB3,LHBC,CAB36,LOC103714770,LOC103719342,lhcb3,LOC104612608	#N/A	CHE	810	complete	ISS_1	IPR001344,IPR023329,IPR022796	Chlorophyll a-b binding protein 13, chloroplastic	light-harvesting chlorophyll B-binding protein 3	LOC_Os07g37550	0.85	1	1	2255.07	2353.09	3747.19	3116.7	0.0613801	0.732636	0.466847	0.146374	0.687565	0.557541	K08914|1|1e-142|503|vvi:100260599|light-harvesting complex II chlorophyll a/b binding protein 3		GO:0043234//protein complex;GO:0009534//chloroplast thylakoid	-	GO:0006091//generation of precursor metabolites and energy	COCehwD025228.1	CN01_06P010140
CN01_scaffold085923P000010	CN01_scaffold085923G000010	ROS	GST	GSTF12,GSTF11,GSTF9,GSTF10,LOC103724244	35	CHE	666	complete	ISS_1	IPR034347,IPR004046,IPR004045,IPR010987,IPR040079,IPR036282,IPR036249	glutathione S-transferase F12	Glutathione S-transferase family protein	LOC_Os01g55830	0.4	0.96	0.98	1714.88	2127.3	1495.88	932.49	0.310911	-0.197119	-0.87895	0.447799	0.311594	0.744524	K00799|1|2e-78|289|pop:POPTR_678517|glutathione S-transferase [EC:2.5.1.18]		-	-	-	COCehwD026449.1	CN01_U03P015230
CN01_08P006920	CN01_08G006920	#N/A	#N/A	AN3,FHT,F3H,LOC103697163,LOC103708217,103992006	#N/A	CHE	1116	complete	ISS_1	IPR026992,IPR005123,IPR027443	naringenin,2-oxoglutarate 3-dioxygenase	flavanone 3-hydroxylase	LOC_Os04g56700.1	0.73	1	1	1624.68	2108.36	2448.46	1336.84	0.375963	0.591716	-0.281337	0.510181	0.622961	0.399113	K00475|1|1e-166|584|vvi:100253950|naringenin 3-dioxygenase [EC:1.14.11.9]		-	GO:0016706//oxidoreductase activity, acting on paired donors, with incorporation or reduction of molecular oxygen, 2-oxoglutarate as one donor, and incorporation of one atom each of oxygen into both donors;GO:0019842//vitamin binding;GO:0043169//cation binding;GO:0016701//oxidoreductase activity, acting on single donors with incorporation of molecular oxygen	GO:0009699//phenylpropanoid biosynthetic process	COCehwD026606.1	CN01_08P006920
CN01_07P012680	CN01_07G012680	#N/A	#N/A	PORA,PORB,POR1,LOC103721112,ACMD2_03437,LOC103696187	#N/A	CHE	1080	complete	ISS_1	IPR005979,IPR002347,IPR036291	protochlorophyllide reductase	protochlorophyllide oxidoreductase A	LOC_Os10g35370	0.81	0.95	0.85	2872.37	2046.45	1600.23	1795.94	-0.489117	-0.843958	-0.677501	0.592504	0.724851	0.67695	K00218|1|5e-171|598|rcu:RCOM_0252880|protochlorophyllide reductase [EC:1.3.1.33]		GO:0009536//plastid	GO:0016628//oxidoreductase activity, acting on the CH-CH group of donors, NAD or NADP as acceptor	GO:0006779//porphyrin-containing compound biosynthetic process	COCehwD024538.1	CN01_07P012680
CN01_scaffold021683P000030	CN01_scaffold021683G000030	#N/A	#N/A	CAB-151,CAB36,CAB37,CAB4,LOC103721926,LOC104606593,ACMD2_14162	#N/A	CHE	798	complete	ISS_1	IPR023329,IPR022796,IPR001344	Chlorophyll a-b binding protein 151, chloroplastic	photosystem II light harvesting complex gene 2.2	LOC_Os03g39610	0.87	1	1	2526.71	2039.49	2203.69	1740.51	-0.309054	-0.197337	-0.537754	0.447847	0.311718	0.602806	K08913|1|1e-131|467|rcu:RCOM_0483250|light-harvesting complex II chlorophyll a/b binding protein 2		GO:0009521;GO:0031224//intrinsic to membrane;GO:0009534//chloroplast thylakoid	GO:0046906//tetrapyrrole binding;GO:0043169//cation binding	GO:0006464//cellular protein modification process;GO:0006091//generation of precursor metabolites and energy	COCehwD009893.1	CN01_U02P020640
CN01_11P001740	CN01_11G001740	#N/A	#N/A	unknown_gene	#N/A	CHE	177	missing_functional_completeness	ISS_5	#N/A	hypothetical protein	Pyridoxal phosphate (PLP)-dependent transferases superfamily protein	LOC_Os10g25940	0.39	0.38	0.37	1663.22	1928.98	2185.11	2222.16	0.213862	0.393732	0.41799	0.345163	0.487796	0.522361	-		-	-	-	COCehwD017844.1	CN01_11P001740
CN01_14P005470	CN01_14G005470	#N/A	#N/A	PSBO,LOC103715159,LOC103705634,LOC104595811,AMTR_s00059p00176390	#N/A	CHE	1005	complete	ISS_1	IPR002628,IPR011250	oxygen-evolving enhancer protein 1, chloroplastic	photosystem II subunit O-2	LOC_Os01g31690	0.83	0.99	1	1803.86	1917.83	3088.61	2826.21	0.0883848	0.775866	0.647779	0.192519	0.70565	0.661024	K02716|1|2e-156|549|vvi:100245459|photosystem II oxygen-evolving enhancer protein 1		GO:0009523//photosystem II;GO:0009534//chloroplast thylakoid	GO:0046872//metal ion binding	GO:0042548//regulation of photosynthesis, light reaction	COCehwD016758.1	CN01_14P005470
CN01_06P011320	CN01_06G011320	#N/A	#N/A	UBQ11,UBQ3,UBQ14,PAHAL_J02043,POPTR_0001s44440g,LE_TR2986_c5_g2_i1_g.9747,MP_TR22243_c3_g1_i1_g.62986	#N/A	CHE	690	complete	ISS_1	IPR000626,IPR019956,IPR019954,IPR029071	Polyubiquitin 11	polyubiquitin 10	LOC_Os06g46770.6	1	1	0.75	2895.94	1877.43	2567.26	2154.96	-0.625277	-0.173806	-0.426372	0.670902	0.278996	0.529339	K08770|1|6e-125|444|mtr:MTR_8g018230|ubiquitin C		GO:0043231//intracellular membrane-bounded organelle	-	GO:0032502//developmental process;GO:0019941//modification-dependent protein catabolic process;GO:0010033//response to organic substance;GO:0016567//protein ubiquitination	COCehwD012312.1	CN01_06P011320
CN01_14P009330	CN01_14G009330	#N/A	#N/A	PSAF,LOC103705445,CDL15_Pgr001030,Csa_1G714680	#N/A	CHE	705	complete	ISS_2	IPR036577,IPR003666	Photosystem I reaction center subunit III, chloroplastic	photosystem I subunit F	LOC_Os03g56670	0.78	0.91	0.93	1356.14	1823.6	2636.63	2330.96	0.427281	0.959191	0.781418	0.550456	0.762166	0.714758	K02694|1|1e-78|290|bdi:100831679|photosystem I subunit III		GO:0009534//chloroplast thylakoid;GO:0009522//photosystem I	-	GO:0044237//cellular metabolic process	COCehwD000849.1	CN01_14P009330
CN01_08P008550	CN01_08G008550	#N/A	#N/A	PCKR1,CYP19-1,CYP,LOC103714064	#N/A	CHE	522	complete	ISS_1	IPR002130,IPR020892,IPR024936,IPR029000	peptidyl-prolyl cis-trans isomerase CYP19-1	rotamase cyclophilin 2	LOC_Os09g39780	0.76	0.99	0.97	1134.28	1774.21	964.863	893.4	0.645398	-0.233385	-0.344403	0.679696	0.342131	0.456341	K01802|1|2e-74|276|ath:AT2G21130|peptidylprolyl isomerase [EC:5.2.1.8]		-	GO:0016859//cis-trans isomerase activity	GO:0044267//cellular protein metabolic process	COCehwD008650.1	CN01_08P008550
CN01_04P008100	CN01_04G008100	#N/A	#N/A	ANR,LOC103698208,GLYMA_08G062000	#N/A	CHE	522	fragment	ISS_3	IPR036291	putative Anthocyanidin reductase ((2S)-flavan-3-ol-forming)	NAD(P)-binding Rossmann-fold superfamily protein	LOC_Os04g53850.1	0.4	0.91	0.41	1078.36	1739.32	1337.91	986.455	0.689689	0.31115	-0.128509	0.697416	0.418739	0.235503	K08695|1|3e-40|162|vvi:100232981|anthocyanidin reductase [EC:1.3.1.77]		-	-	-	COCehwD016963.1	CN01_04P008100
CN01_14P006720	CN01_14G006720	#N/A	#N/A	LHCB4.2,LHCB4.1,LHCB4.3,Lhcb4,LOC103714751,CipCp29,Vigan.09G078900,LR48_Vigan11g117200	#N/A	CHE	528	fragment	ISS_3	IPR022796,IPR001344	putative Chlorophyll a-b binding protein CP29.2, chloroplastic	light harvesting complex photosystem II	LOC_Os07g37240.1	0.8	0.92	0.56	1568.58	1675.9	1490.63	1394.97	0.095477	-0.0735401	-0.16922	0.205348	0.15438	0.282457	K08915|1|4e-65|244|osa:4343583|light-harvesting complex II chlorophyll a/b binding protein 4		GO:0009536//plastid	-	GO:0044237//cellular metabolic process	COCehwD007969.1	CN01_14P006720
CN01_15P001780	CN01_15G001780	#N/A	#N/A	CBP,ASR1,ASR2,ASR3,LOC103701382,LOC103701222	#N/A	CHE	999	modules	ISS_3	IPR013320,IPR003496,IPR014895	putative Citrate-binding protein	#N/A	LOC_Os12g06830.1	0.44	0.58	0.88	836.637	1631.88	992.703	1018.51	0.963859	0.246761	0.283787	0.782691	0.362367	0.398728	-		-	-	-	COCehwD009377.1	CN01_15P001780
CN01_01P019510	CN01_01G019510	#N/A	#N/A	PSBS,LOC103702676,PSBS_1,103983661	#N/A	CHE	1125	modules	ISS_3	IPR022796,IPR029017,IPR023329,IPR020811	putative Photosystem II 22 kDa protein, chloroplastic	Chlorophyll A-B binding family protein	LOC_Os01g64960	0.77	0.64	0.91	1296.33	1516.59	1846.14	1391.48	0.226394	0.510075	0.102189	0.367035	0.57669	0.199771	K03542|1|2e-85|314|vvi:100245393|photosystem II 22kDa protein		GO:0009534//chloroplast thylakoid	GO:0046906//tetrapyrrole binding;GO:0019840//isoprenoid binding	GO:0009416//response to light stimulus	COCehwD007532.1	CN01_01P019510
CN01_14P002170	CN01_14G002170	ABA	BURP,RD22	RD22,BURP3,BURP5,BURP17,LOC103708992,MANES_03G066300,POPTR_006G243700v3	66	CHE	1107	complete	ISS_1	IPR004873	BURP domain-containing protein 3	BURP domain-containing protein	LOC_Os01g53240	0.57	0.94	0.79	1366.97	1462.65	697.863	785.475	0.0976065	-0.969962	-0.799341	0.205321	0.763648	0.720254	-		-	-	-	COCehwD008854.1	CN01_14P002170
CN01_scaffold004803P000010	CN01_scaffold004803G000010	#N/A	#N/A	CRD1,LOC103698135,MPEC,L484_027977,JCGZ_02881	#N/A	CHE	1137	complete	ISS_2	IPR003251,IPR008434,IPR009078	Magnesium-protoporphyrin IX monomethyl ester [oxidative] cyclase, chloroplastic	dicarboxylate diiron protein, putative (Crd1)	LOC_Os01g17170.1	0.76	0.99	0.99	1467.12	1460.17	2040.02	1807.21	-0.00685053	0.475596	0.300777	0.0776256	0.552745	0.418972	K04035|1|3e-173|605|vvi:100241461|magnesium-protoporphyrin IX monomethyl ester (oxidative) cyclase [EC:1.14.13.81]		GO:0009536//plastid	GO:0016709//oxidoreductase activity, acting on paired donors, with incorporation or reduction of molecular oxygen, NAD(P)H as one donor, and incorporation of one atom of oxygen;GO:0046914//transition metal ion binding	GO:0006779//porphyrin-containing compound biosynthetic process	COCehwD019367.1	CN01_U02P006820
CN01_15P001020	CN01_15G001020	#N/A	#N/A	At5g06290,BAS1,LOC103714272,ACMD2_03483,103988114	#N/A	CHE	813	complete	ISS_1	IPR013766,IPR000866,IPR019479,IPR036249,IPR024706	2-Cys peroxiredoxin BAS1, chloroplastic	2-cysteine peroxiredoxin B	LOC_Os02g33450.2	0.92	0.76	0.78	1331.91	1435.2	1073.64	923.86	0.107755	-0.310991	-0.52775	0.217592	0.418739	0.597361	K03386|1|1e-115|414|vvi:100259748|peroxiredoxin (alkyl hydroperoxide reductase subunit C) [EC:1.11.1.15]		-	-	-	COCehwD020965.1	CN01_15P001020
CN01_09P003330	CN01_09G003330	#N/A	#N/A	BEL1,SWEETIE,PI4KB2,LIP2p,LOC103712213,LOC103710692,LOC103719661,LOC103702686	#N/A	CHE	540	fragment	ISS_3	#N/A	putative Homeobox protein BEL1	POX (plant homeobox) family protein	LOC_Os03g03260.1	0.33	0.99	0.35	1528.44	1417.62	777.98	972.085	-0.108592	-0.974255	-0.652906	0.217592	0.7638	0.66068	-		-	-	-	COCehwD022777.1	CN01_09P003330
CN01_01P008480	CN01_01G008480	#N/A	#N/A	Os08g0242700,OsI_027381,ACR11,ACR12,LOC103698234,ACMD2_13642,103981957	#N/A	CHE	765	complete	ISS_2	IPR040217	ACT domain-containing protein DS12, chloroplastic	uridylyltransferase-related	LOC_Os08g14440.2	0.65	0.96	0.93	775.08	1411.04	1584.92	1510.82	0.864338	1.03199	0.96291	0.754176	0.782843	0.768158	-		-	-	-	COCehwD005495.1	CN01_01P008480
CN01_contig69359625P000010	CN01_contig69359625G000010	#N/A	#N/A	DRMH1,DRMH2,DRM1,ARP,CDL12_20037,LOC104608181,LOC109020786	#N/A	CHE	222	fragment	ISS_3	IPR008406	putative Dormancy-associated protein	dormancy-associated protein-like 1	LOC_Os11g44810	0.82	0.67	0.39	1299.7	1398.88	820.363	1222.51	0.10609	-0.663844	-0.0883324	0.217571	0.656835	0.187568	-		-	-	-	COCehwD000386.1	COCehwD000386.1
CN01_04P015340	CN01_04G015340	#N/A	#N/A	MTA,MT1B,MT2a,MT2b,LOC103721984	#N/A	CHE	156	fragment	ISS_3	IPR000347	putative Metallothionein-like protein type 2	metallothionein 2A	LOC_Os01g05585	0.62	0.96	0.8	1187.7	1330.43	804.573	664.55	0.163723	-0.561871	-0.837717	0.286347	0.603207	0.732864	-		-	GO:0043169//cation binding	-	COCehwD020365.1	CN01_04P015340
CN01_02P015910	CN01_02G015910	#N/A	#N/A	CHS1,CHS2,CHS3,LOC103712379,LOC103720326	#N/A	CHE	1179	complete	ISS_1	IPR011141,IPR016039,IPR001099,IPR018088,IPR012328	Chalcone synthase 2	Chalcone and stilbene synthase family protein	LOC_Os11g32650.1	0.89	0.99	0.97	1076.03	1315.68	1889.97	926.545	0.290095	0.812652	-0.215781	0.428582	0.715454	0.337891	K00660|1|0.0|691|osa:4350636|chalcone synthase [EC:2.3.1.74]		-	-	-	COCehwD001581.1	CN01_02P015910
CN01_12P007230	CN01_12G007230	#N/A	#N/A	CHI,LOC103696411	#N/A	CHE	705	complete	ISS_1	IPR016087,IPR036298,IPR016089,IPR016088	chalcone--flavonone isomerase	Chalcone-flavanone isomerase family protein	LOC_Os03g60509.2	0.66	0.97	0.99	1108.73	1310.43	1364.49	953.94	0.241137	0.299462	-0.216933	0.377443	0.409334	0.337933	K01859|1|8e-80|294|zma:100276821|chalcone isomerase [EC:5.5.1.6]		-	GO:0016872//intramolecular lyase activity	GO:0009699//phenylpropanoid biosynthetic process;GO:0006575//cellular modified amino acid metabolic process	COCehwD011018.1	CN01_12P007230
CN01_09P004780	CN01_09G004780	#N/A	#N/A	PETE,LOC103718918,PETE_0,RCOM_1599580,LOC101495137	#N/A	CHE	510	complete	ISS_1	IPR000923,IPR001235,IPR028871,IPR002387,IPR008972	plastocyanin B'/B''	plastocyanin 1	LOC_Os06g01210	0.56	0.99	0.99	1413.53	1233.69	2088.76	1977.39	-0.196322	0.563343	0.484292	0.334471	0.603718	0.56384	K02638|1|4e-51|198|gmx:100306554|plastocyanin		GO:0009536//plastid	-	-	COCehwD021774.1	CN01_09P004780
CN01_14P008980	CN01_14G008980	#N/A	#N/A	PSBP,PSBP2,LOC103721347,LOC103709811,LOC104590780,103999082	#N/A	CHE	780	complete	ISS_1	IPR002683,IPR016123	oxygen-evolving enhancer protein 2, chloroplastic	photosystem II subunit P-1	LOC_Os07g04840	0.73	1	1	882.197	1231.57	1669.27	1691.15	0.48133	0.920042	0.938837	0.583889	0.750852	0.763934	K02717|1|6e-114|408|gmx:100802315|photosystem II oxygen-evolving enhancer protein 2		GO:0009523//photosystem II;GO:0009534//chloroplast thylakoid	GO:0046872//metal ion binding	GO:0044237//cellular metabolic process	COCehwD001963.1	CN01_14P008980
CN01_11P013650	CN01_11G013650	#N/A	#N/A	GGCT2;1,GGCT2;2,GGCT2;3,psaB,LOC101514800,LOC103715560,CHAC1	#N/A	CHE	201	fragment	ISS_3	IPR006840	putative Gamma-glutamylcyclotransferase 2-1	ChaC-like family protein	LOC_Os02g26700	0.74	0.98	0.97	2325.49	1201.28	1455	3156.14	-0.952968	-0.676514	0.440622	0.780456	0.66748	0.536619	K07232|1|2e-19|91.7|osa:4335982|cation transport protein ChaC		-	-	GO:0010038//response to metal ion	COCehwD016423.1	CN01_11P013650
CN01_11P011000	CN01_11G011000	#N/A	#N/A	UBC28,UBC11,UBC8,LOC103702343,LOC103710644,UBC9_0	#N/A	CHE	336	fragment	ISS_3	IPR000608,IPR023313,IPR016135	putative Ubiquitin-conjugating enzyme E2 28	ubiquitin-conjugating enzyme 28	LOC_Os09g12230	0.93	0.99	0.74	1686.72	1190.52	1962.61	3034.12	-0.502627	0.218553	0.847055	0.598036	0.331906	0.736483	K06689|1|1e-59|225|osa:4346639|ubiquitin-conjugating enzyme E2 D/E [EC:6.3.2.19]		-	GO:0019787//small conjugating protein ligase activity;GO:0032559	GO:0019941//modification-dependent protein catabolic process;GO:0032446//protein modification by small protein conjugation	COCehwD016575.1	CN01_11P011000
CN01_05P008870	CN01_05G008870	#N/A	#N/A	MCM6,TOE2,LOC103712767,LOC104609345,MANES_16G097300,LOC103705775	#N/A	CHE	366	complete	ISS_4	IPR009518	conserved hypothetical protein	Coatomer, beta subunit	LOC_Os11g07280	0.27	0.6	0.08	1186.29	1167.7	2083.83	1634.64	-0.0227789	0.812785	0.462525	0.0902551	0.715544	0.551106	-		GO:0009521;GO:0009534//chloroplast thylakoid	-	GO:0044237//cellular metabolic process	COCehwD006575.1	CN01_05P008870
CN01_11P006660	CN01_11G006660	#N/A	#N/A	HSP81-3,HSP81-2,HSP81-1,LOC103722384,LOC103722381,HSP81-2_2	#N/A	CHE	2106	complete	ISS_1	IPR001404,IPR003594,IPR036890,IPR037196,IPR020568,IPR020575,IPR019805	Heat shock protein 81-3	heat shock protein 81-2	LOC_Os08g39140.1	0.96	1	1	1067.02	1161.11	1168.61	1426.04	0.121922	0.131206	0.418422	0.230387	0.234876	0.522101	K04079|1|0.0|1058|gmx:100807416|molecular chaperone HtpG		GO:0044424//intracellular part	GO:0005515//protein binding;GO:0032559	GO:0044267//cellular protein metabolic process;GO:0050896//response to stimulus	COCehwD027364.1	CN01_11P006660
CN01_08P000360	CN01_08G000360	#N/A	GST	GSTU17,GSTU18,GSTU16,GSTU15,LOC103696108,LOC103698564,LOC103716739,GSTU7	35	CHE	705	complete	ISS_1	IPR010987,IPR036282,IPR036249,IPR004045,IPR004046	glutathione S-transferase U17-like	glutathione S-transferase TAU 18	LOC_Os10g38489.1	0.52	0.99	0.99	1199.86	1154.8	1352.98	1318.09	-0.0552231	0.173271	0.135577	0.14627	0.278796	0.247758	K00799|1|9e-92|334|vvi:100245065|glutathione S-transferase [EC:2.5.1.18]		GO:0009536//plastid	GO:0016765//transferase activity, transferring alkyl or aryl (other than methyl) groups;GO:0016846//carbon-sulfur lyase activity	GO:0043434//response to peptide hormone stimulus;GO:0009404//toxin metabolic process;GO:0048528//post-embryonic root development;GO:0009416//response to light stimulus	COCehwD003614.1	CN01_08P000360
CN01_contig69364049P000010	CN01_contig69364049G000010	#N/A	#N/A	CP12-2,CP12-1,CP12,CP12-3,LOC103700971,103971278,103987191,MANES_05G003500	#N/A	CHE	387	complete	ISS_1	IPR003823,IPR039314	calvin cycle protein CP12-1, chloroplastic	CP12 domain-containing protein 2	LOC_Os03g19380.1	0.6	0.99	0.99	781.387	1148.78	1398.03	1436.84	0.555998	0.839283	0.878786	0.634034	0.72421	0.744368	-		GO:0043231//intracellular membrane-bounded organelle	-	-	COCehwD000391.1	COCehwD000391.1
CN01_16P006870	CN01_16G006870	#N/A	#N/A	EF1,REFA1,EF1A,LOC103708765,LOC103708774,EF1-a1,LOC103706658	#N/A	CHE	1344	complete	ISS_1	IPR004161,IPR009000,IPR000795,IPR004539,IPR031157,IPR009001,IPR004160,IPR027417	Elongation factor 1-alpha	GTP binding Elongation factor Tu family protein	LOC_Os03g08020.1	0.97	1	1	810.083	1147.93	944.82	1062	0.502892	0.221969	0.390642	0.597698	0.331486	0.498144	K03231|1|0.0|865|rcu:RCOM_1019100|elongation factor 1-alpha		GO:0044424//intracellular part	GO:0016772//transferase activity, transferring phosphorus-containing groups;GO:0017111//nucleoside-triphosphatase activity;GO:0008135//translation factor activity, nucleic acid binding;GO:0032561//guanyl ribonucleotide binding	GO:0006412//translation;GO:0009207	COCehwD005779.1	CN01_16P006870
CN01_04P004620	CN01_04G004620	#N/A	#N/A	CHI3,CHI,LOC103708901,LOC103721160	#N/A	CHE	666	complete	ISS_1	IPR036298,IPR016087,IPR016088,IPR016089	Chalcone-flavonone isomerase family protein	Chalcone-flavanone isomerase family protein	LOC_Os12g02370.2	0.74	0.91	0.98	910.12	1146.95	1075.07	824.11	0.333674	0.240297	-0.14322	0.466119	0.352342	0.247612	K01859|1|5e-19|92.4|pop:POPTR_724846|chalcone isomerase [EC:5.5.1.6]		-	GO:0016872//intramolecular lyase activity	GO:0009699//phenylpropanoid biosynthetic process;GO:0006575//cellular modified amino acid metabolic process	COCehwD003307.1	CN01_04P004620
CN01_08P001100	CN01_08G001100	#N/A	#N/A	CPSF30,Os06g0677700,At1g28590,TIC214,LOC103723642,LOC103699185,ACMD2_06255,YTHDF2_19	#N/A	CHE	1905	complete	ISS_1	IPR007275	YTH domain-containing protein ECT4	evolutionarily conserved C-terminal region 2	LOC_Os03g53670	0.64	0.9	0.84	1406.12	1112.99	1832.23	2385.5	-0.337283	0.381877	0.762569	0.476479	0.479798	0.707436	-		-	-	-	COCehwD014764.1	CN01_08P001100
CN01_10P000240	CN01_10G000240	#N/A	#N/A	RPL44,RPL36AA,TRS120,LOC103703970	#N/A	CHE	333	complete	ISS_1	IPR000552,IPR011332	60S ribosomal protein L44	Zinc-binding ribosomal protein family protein	LOC_Os07g33860.1	0.96	0.96	0.8	559.993	1101.28	590.86	658.85	0.975704	0.0774067	0.23454	0.787278	0.172913	0.348102	K02929|1|4e-53|203|zma:100284825|large subunit ribosomal protein L44e		-	-	-	COCehwD024289.1	CN01_10P000240
CN01_04P006640	CN01_04G006640	#N/A	#N/A	Os01g0270100,CYS6,LOC103705057,LOC103706285,VIT_06s0009g02230,PRUPE_2G047100	#N/A	CHE	318	complete	ISS_2	IPR018073,IPR000010,IPR027214	Cysteine proteinase inhibitor	cystatin B	LOC_Os01g16430	0.63	0.89	0.37	834.26	1099.29	646.483	761.015	0.398003	-0.367884	-0.132572	0.525487	0.471139	0.235294	-		-	GO:0030414//peptidase inhibitor activity	-	COCehwD011696.1	CN01_04P006640
CN01_11P009710	CN01_11G009710	#N/A	#N/A	RPL7C,RPL7D,RPL7B,RPL7A,LOC103701498,LOC103707044,LOC103714103	#N/A	CHE	522	fragment	ISS_3	IPR023106,IPR036919,IPR016082,IPR005998,IPR039699,IPR018038,IPR035808	putative 60S ribosomal protein L7-3	Ribosomal protein L30/L7 family protein	LOC_Os04g51630	0.92	0.87	0.61	680.077	1091.15	572.797	712.74	0.682076	-0.247674	0.0676785	0.693478	0.361995	0.156967	K02937|1|4e-65|244|vvi:100242794|large subunit ribosomal protein L7e		GO:0030529//ribonucleoprotein complex	GO:0005198//structural molecule activity	GO:0010467//gene expression	COCehwD001436.1	CN01_11P009710
CN01_10P004490	CN01_10G004490	#N/A	#N/A	PSBY,LRK10L-2.3,PCMP-E54,LOC103712192,103996005,103976304,LOC107916725	#N/A	CHE	819	modules	ISS_3	IPR009388,IPR038760	putative Photosystem II core complex proteins psbY, chloroplastic	photosystem II BY	LOC_Os08g02630	0.67	0.4	0.54	1059.87	1086.26	2258.24	2153.54	0.0354866	1.09131	1.02282	0.120032	0.799135	0.787756	K02723|1|4e-47|186|vvi:100252545|photosystem II PsbY protein		-	-	-	COCehwD002418.1	CN01_10P004490
CN01_scaffold000388P000010	CN01_scaffold000388G000010	#N/A	#N/A	CCP1,RD19A,RD19B,LOC103695876,LOC103695678,103989280,103988663	#N/A	CHE	1116	complete	ISS_1	IPR000169,IPR013201,IPR039417,IPR025661,IPR000668,IPR025660,IPR038765	cysteine proteinase 1	Papain family cysteine protease	LOC_Os02g27030.1	0.75	0.95	0.95	673.007	1063.34	804.853	758.845	0.65991	0.258105	0.173184	0.685166	0.371558	0.28203	K01376|1|2e-135|480|osa:4329339|[EC:3.4.22.-];K01373|5|5e-100|362|ppp:PHYPADRAFT_209158|cathepsin F [EC:3.4.22.41]		GO:0031410//cytoplasmic vesicle	GO:0004175//endopeptidase activity	GO:0019538//protein metabolic process	COCehwD016800.1	CN01_U01P013110
CN01_scaffold003330P000010	CN01_scaffold003330G000010	#N/A	#N/A	H3,HTR4,POPTR_007G014300v3,LR48_Vigan07g283000,SOVF_150860,MA16_Dca003468	#N/A	CHE	384	complete	ISS_2	IPR000164,IPR009072,IPR007125	Histone H3.3	Histone superfamily protein	LOC_Os03g27310.2	0.98	0.9	0.84	905.62	1049.88	834.32	992.585	0.213247	-0.118305	0.132285	0.344832	0.223679	0.235451	K11253|1|1e-58|222|mtr:MTR_4g097170|histone H3		-	-	-	COCehwD014802.1	CN01_U02P009760
CN01_02P010100	CN01_02G010100	#N/A	#N/A	PSAO,BRCA2A,BRCA2B,LOC103703121,MA16_Dca013557,LOC107764264	#N/A	CHE	438	complete	ISS_1	IPR017498	photosystem I subunit O	photosystem I subunit O	LOC_Os04g33830	0.66	0.83	0.88	956	1032.5	1569.08	1269.42	0.111055	0.714836	0.409093	0.217447	0.678863	0.514049	K14332|1|8e-54|206|vvi:100244962|photosystem I subunit PsaO		GO:0009521;GO:0009536//plastid	-	GO:0009765//photosynthesis, light harvesting	COCehwD026373.1	CN01_02P010100
CN01_scaffold088684P000010	CN01_scaffold088684G000010	#N/A	#N/A	ANR,BAN,LOC103698208,LOC104604944	#N/A	CHE	561	fragment	ISS_3	IPR001509,IPR036291	putative Anthocyanidin reductase ((2S)-flavan-3-ol-forming)	NAD(P)-binding Rossmann-fold superfamily protein	LOC_Os04g53780	0.57	0.99	0.58	684.56	1021.93	798.1	449.045	0.578043	0.221393	-0.608317	0.645926	0.331348	0.640321	K08695|1|2e-63|239|pop:POPTR_831060|anthocyanidin reductase [EC:1.3.1.77]		-	GO:0048037//cofactor binding	GO:0008152//metabolic process	COCehwD026760.1	CN01_U03P013730
CN01_11P001750	CN01_11G001750	#N/A	#N/A	unknown_gene	#N/A	CHE	237	missing_functional_completeness	ISS_5	#N/A	hypothetical protein	#N/A	LOC_Os02g50950	0.31	0.45	0.26	1276.92	1021.47	1503.26	1618.06	-0.32202	0.235426	0.341593	0.456959	0.35259	0.456644	-		-	-	-	COCehwD017843.1	CN01_11P001750
CN01_scaffold007252P000060	CN01_scaffold007252G000060	#N/A	#N/A	LHCB5,CAB1R,CAB2R,LOC103701619,CDL12_25920,CICLE_v10021452mg,CUMW_216470	#N/A	CHE	879	complete	ISS_1	IPR022796,IPR023329,IPR001344	chlorophyll a-b binding protein CP26, chloroplastic	light harvesting complex of photosystem II 5	LOC_Os11g13890	0.8	0.96	0.99	863.23	1005.68	1572.86	1184.46	0.22035	0.86557	0.456413	0.355647	0.732525	0.550803	K08916|1|2e-134|476|vvi:100246457|light-harvesting complex II chlorophyll a/b binding protein 5		GO:0009503;GO:0009523//photosystem II;GO:0009570//chloroplast stroma	GO:0046906//tetrapyrrole binding	GO:0009639//response to red or far red light;GO:0006091//generation of precursor metabolites and energy	COCehwD024317.1	CN01_U01P014450
CN01_scaffold003535P000010	CN01_scaffold003535G000010	#N/A	#N/A	RPS19A,RPS19C,RPS19B,LOC103700865,LOC103718182,LOC103709249	#N/A	CHE	435	complete	ISS_1	IPR018277,IPR038111,IPR036390,IPR001266	40S ribosomal protein S19	glycerol-3-phosphate acyltransferase 6	LOC_Os05g37600	0.33	0.31	0.08	605.17	953.583	620.147	673.3	0.656019	0.035269	0.153909	0.685007	0.11559	0.258469	K02966|1|3e-68|254|gmx:100305587|small subunit ribosomal protein S19e		GO:0030529//ribonucleoprotein complex	GO:0005198//structural molecule activity	GO:0010467//gene expression	COCehwD015518.1	CN01_U02P014540
CN01_scaffold023964P000010	CN01_scaffold023964G000010	#N/A	#N/A	SDH,VIT_16s0100g00290,At4g22110,At1g22440,LOC103721379,103983248,ACMD2_15563	#N/A	CHE	1086	complete	ISS_1	IPR011032,IPR020843,IPR002328,IPR013154,IPR013149,IPR036291	sorbitol dehydrogenase	GroES-like zinc-binding alcohol dehydrogenase family protein	LOC_Os08g43190	0.78	0.96	0.94	1113.43	950.823	770.153	667.11	-0.227766	-0.531798	-0.739019	0.366773	0.58717	0.699906	K00008|1|1e-168|590|gmx:100820630|L-iditol 2-dehydrogenase [EC:1.1.1.14]		-	-	-	COCehwD011326.1	CN01_U03P002770
CN01_01P006920	CN01_01G006920	#N/A	#N/A	CAB8,lhca3,LHCA3,LHCA5,LOC103710643	#N/A	CHE	1965	modules	ISS_3	IPR022796,IPR023329	putative Chlorophyll a-b binding protein 8, chloroplastic	#N/A	LOC_Os06g40740	0.5	0.46	0.53	991.05	950.263	1518.9	1306.04	-0.0606305	0.616	0.398164	0.14625	0.636978	0.505423	K08909|1|2e-117|421|vvi:100232927|light-harvesting complex I chlorophyll a/b binding protein 3		-	-	-	COCehwD026334.2	CN01_01P006920
CN01_scaffold000154P000160	CN01_scaffold000154G000160	#N/A	#N/A	HSP70,HSP70-7,HSP70-6,CHSP70,LOC103708892,AQUCO_00300048v1,LOC107927450,B456_005G009100	#N/A	CHE	2145	complete	ISS_1	IPR013126,IPR029048,IPR018181,IPR029047,IPR012725	stromal 70 kDa heat shock-related protein, chloroplastic	chloroplast heat shock protein 70-2	LOC_Os05g23740	0.91	0.91	0.94	551.183	942.173	608.667	465.19	0.77346	0.14312	-0.244712	0.726358	0.245915	0.358365	K03283|1|0.0|1071|aly:ARALYDRAFT_495046|heat shock 70kDa protein 1/8		GO:0009532//plastid stroma	GO:0005515//protein binding;GO:0016628//oxidoreductase activity, acting on the CH-CH group of donors, NAD or NADP as acceptor;GO:0032559	GO:0050896//response to stimulus;GO:0044267//cellular protein metabolic process	COCehwD006109.1	CN01_U01P000540
CN01_09P001100	CN01_09G001100	#N/A	#N/A	CPN60B2,CPN60B1,CPN60B3,LOC103716830,LOC103723856,LOC103720995	#N/A	CHE	1641	complete	ISS_1	IPR027409,IPR018370,IPR027413,IPR001844,IPR027410,IPR002423	RuBisCO large subunit-binding protein subunit beta, chloroplastic	chaperonin 60 beta	LOC_Os06g02380.1	0.92	1	0.91	673.203	939.713	472.377	475.365	0.481178	-0.511105	-0.502007	0.583509	0.575242	0.575741	K04077|1|0.0|934|bdi:100842360|chaperonin GroEL		GO:0009526//plastid envelope;GO:0005840//ribosome;GO:0009532//plastid stroma;GO:0031981//nuclear lumen	GO:0005515//protein binding;GO:0032559	GO:0006457//protein folding	COCehwD001496.1	CN01_09P001100
CN01_scaffold003185P000010	CN01_scaffold003185G000010	#N/A	GST	PARA,PARC,GSTU19,LOC103695845,LOC103721090,GSTU5	35	CHE	669	complete	ISS_2	IPR004045,IPR004046,IPR036282,IPR010987,IPR036249	Glutathione S-transferase U19	glutathione S-transferase TAU 24	LOC_Os07g28480.1	0.54	1	0.99	1064.09	931.34	1265.72	988.325	-0.19224	0.250334	-0.106563	0.322718	0.362546	0.211587	K00799|1|2e-71|266|gmx:547936|glutathione S-transferase [EC:2.5.1.18]		-	GO:0016829//lyase activity	-	COCehwD014330.1	CN01_U01P008760
CN01_07P008400	CN01_07G008400	#N/A	#N/A	CURT1B,CURT1C,CURT1A,CURT1D,103994232,LOC103712789,ACMD2_11460,CFP56_27776	#N/A	CHE	534	complete	ISS_1	IPR033344,IPR025564	protein CURVATURE THYLAKOID 1B, chloroplastic	photosystem I P subunit	LOC_Os07g28610	0.52	0.8	0.89	927.697	892.297	1786	1489.98	-0.0561297	0.945007	0.683573	0.146201	0.759897	0.676554	-		GO:0009526//plastid envelope;GO:0009534//chloroplast thylakoid;GO:0009522//photosystem I;GO:0000229	-	GO:0009725//response to hormone stimulus;GO:0009767//photosynthetic electron transport chain	COCehwD025811.1	CN01_07P008400
CN01_03P010020	CN01_03G010020	#N/A	#N/A	LAR,IRL1,PCBER,A622L,LOC103696132,LOC103700891,ACMD2_20883,OsI_10820	#N/A	CHE	1029	complete	ISS_1	IPR036291,IPR008030	leucoanthocyanidin reductase	NmrA-like negative transcriptional regulator family protein	LOC_Os03g15360	0.67	1	0.97	1286.78	891.49	1363.34	652.24	-0.529475	0.08338	-0.980291	0.616894	0.17321	0.774312	K13081|1|1e-116|417|osa:4332311|leucoanthocyanidin reductase [EC:1.17.1.3]		-	-	-	COCehwD002934.1	CN01_03P010020
CN01_02P004900	CN01_02G004900	#N/A	#N/A	CYP74B2,HPL,CYP74A,LOC103700822,ACMD2_20967	#N/A	CHE	1455	complete	ISS_2	IPR036396,IPR002403,IPR001128	Linolenate hydroperoxide lyase, chloroplastic	hydroperoxide lyase 1	LOC_Os02g02000	0.62	0.98	0.99	624.633	878.497	621.06	520.585	0.492027	-0.00827691	-0.262876	0.591573	0.0813097	0.379203	K10528|1|4e-161|566|rcu:RCOM_1016730|hydroperoxide lyase [EC:4.1.2.-]		-	GO:0005506//iron ion binding;GO:0016829//lyase activity	-	COCehwD012514.1	CN01_02P004900
CN01_10P000390	CN01_10G000390	#N/A	#N/A	PAL,PAL3,PAL1,LOC103703950	#N/A	CHE	2139	complete	ISS_1	IPR001106,IPR008948,IPR024083,IPR023144,IPR005922	phenylalanine ammonia-lyase	PHE ammonia lyase 1	LOC_Os02g41680	0.77	0.99	0.99	672.057	871.927	884.827	396.01	0.375624	0.396812	-0.763046	0.509339	0.494491	0.705705	K10775|1|0.0|1124|vvi:100241377|phenylalanine ammonia-lyase [EC:4.3.1.24]		GO:0044424//intracellular part	GO:0016840	GO:0006558//L-phenylalanine metabolic process	COCehwD020932.1	CN01_10P000390
CN01_04P000220	CN01_04G000220	#N/A	#N/A	HMGB1,HMGB3,HMGB2,LOC103696731,LOC104601253,BVC80_9077g3,FSB_LOCUS539	#N/A	CHE	642	complete	ISS_2	IPR009071,IPR036910	High mobility group B protein 1	high mobility group B3	LOC_Os04g47690.3	0.39	0.62	0.89	833.16	859.17	612.29	885.155	0.04435	-0.444378	0.0873365	0.120032	0.525676	0.187463	K10802|1|1e-26|117|vvi:100246802|high mobility group protein B1		-	-	-	COCehwD004505.2	CN01_04P000220
CN01_02P013910	CN01_02G013910	#N/A	#N/A	PNSL5,CYP20-3,CYP19-4,LOC103698529,ACMD2_10484,100282887,LOC104592828	#N/A	CHE	720	complete	ISS_1	IPR029000,IPR002130,IPR020892,IPR024936	photosynthetic NDH subunit of lumenal location 5, chloroplastic	cyclophilin 20-2	LOC_Os05g01270.1	0.77	0.97	0.9	467.017	849.103	531.343	506.24	0.862466	0.18617	0.116347	0.753535	0.300204	0.223456	K03768|1|1e-87|320|sbi:SORBI_09g000350|peptidyl-prolyl cis-trans isomerase B (cyclophilin B) [EC:5.2.1.8]		GO:0043231//intracellular membrane-bounded organelle	GO:0016859//cis-trans isomerase activity	GO:0044267//cellular protein metabolic process	COCehwD018424.1	CN01_02P013910
CN01_07P006240	CN01_07G006240	#N/A	#N/A	FBA2,FBA1,ALDP,LOC104607517	#N/A	CHE	1128	complete	ISS_1	IPR013785,IPR029768,IPR000741	fructose-bisphosphate aldolase 1, chloroplastic	fructose-bisphosphate aldolase 2	LOC_Os11g07020	0.79	1	1	1420.92	832.547	1470.54	1364.09	-0.771226	0.049514	-0.0588899	0.726828	0.126967	0.138684	K01623|1|0.0|640|rcu:RCOM_0291680|fructose-bisphosphate aldolase, class I [EC:4.1.2.13]		-	GO:0016832//aldehyde-lyase activity	GO:0006007//glucose catabolic process	COCehwD020126.4	CN01_07P006240
CN01_scaffold018934P000010	CN01_scaffold018934G000010	#N/A	#N/A	GS1-1,GS1-2,LOC103723350,103977579,LOC103706813,GS1	#N/A	CHE	1071	complete	ISS_1	IPR008146,IPR036651,IPR027302,IPR027303,IPR014746,IPR008147	Glutamine synthetase nodule isozyme	glutamine synthetase 1,4	LOC_Os02g50240.1	0.89	1	1	806.393	821.193	1097.35	884.475	0.0262382	0.444464	0.133338	0.10612	0.526083	0.235367	K01915|1|0.0|634|pop:POPTR_710678|glutamine synthetase [EC:6.3.1.2]		GO:0044424//intracellular part	GO:0016211;GO:0032559	GO:0006541//glutamine metabolic process;GO:0071941	COCehwD008247.1	CN01_U03P007550
CN01_02P015160	CN01_02G015160	#N/A	#N/A	RPS8,RPS8B,LOC103698168,102704327,4329381	#N/A	CHE	654	complete	ISS_1	IPR001047,IPR018283,IPR022309	40S ribosomal protein S8	Ribosomal protein S8e family protein	LOC_Os04g28180.1	0.92	0.98	0.96	621.73	818.653	673.427	869.28	0.396964	0.115233	0.483533	0.525031	0.223562	0.562922	K02995|1|4e-75|278|vvi:100257147|small subunit ribosomal protein S8e		GO:0030529//ribonucleoprotein complex;GO:0009536//plastid	GO:0005198//structural molecule activity	GO:0010467//gene expression	COCehwD008807.1	CN01_02P015160
CN01_12P002650	CN01_12G002650	#N/A	#N/A	RPL19B,RPL19C,RPL19A,RPL19,LOC103695997,LOC108511457	#N/A	CHE	825	missing_functional_completeness	ISS_4	IPR035970,IPR000196,IPR039547	conserved hypothetical protein	Ribosomal protein L19e family protein	LOC_Os03g38260	0.93	0.54	0.71	395.007	804.803	488.47	580.79	1.02676	0.306393	0.55614	0.799949	0.417201	0.612933	K02885|1|7e-52|202|ppp:PHYPADRAFT_222528|large subunit ribosomal protein L19e		GO:0030529//ribonucleoprotein complex	GO:0005198//structural molecule activity	GO:0010467//gene expression	COCehwD015171.2	CN01_12P002650
CN01_14P007340	CN01_14G007340	#N/A	#N/A	THI1-2,THI1-1,THI1,LOC103721429,LOC103716822,Vigan.08G058500	#N/A	CHE	1074	complete	ISS_1	IPR002922,IPR036188,IPR027495	thiamine thiazole synthase, chloroplastic	thiazole biosynthetic enzyme, chloroplast (ARA6) (THI1) (THI4)	LOC_Os07g34570.1	0.77	1	1	631.763	797.523	760.473	907.075	0.336143	0.267513	0.521838	0.475734	0.381534	0.591385	K03146|1|3e-154|542|bdi:100841709|thiamine biosynthetic enzyme		GO:0009941//chloroplast envelope	-	GO:0006772//thiamine metabolic process	COCehwD018754.1	CN01_14P007340
CN01_scaffold011975P000040	CN01_scaffold011975G000040	#N/A	#N/A	GLUA2,GLUA1,CRB,LOC103718026,103980620,LOC104601272,GLUA2_1	#N/A	CHE	1047	complete	ISS_1	IPR006045,IPR011051,IPR014710,IPR006044	11S globulin seed storage protein 2	RmlC-like cupins superfamily protein	LOC_Os09g37976	0.44	0.99	0.99	419.287	777.207	582.837	267.81	0.890361	0.475155	-0.646727	0.762302	0.550904	0.657363	-		-	-	-	COCehwD003056.1	CN01_U02P019890
CN01_15P005920	CN01_15G005920	#N/A	#N/A	CHS2,CHS3,CHS5,C2,LOC103712379,LOC103720326,CHS1	#N/A	CHE	1182	complete	ISS_1	IPR016039,IPR011141,IPR012328,IPR018088,IPR001099	chalcone synthase 2	Chalcone and stilbene synthase family protein	LOC_Os11g32650	0.87	0.99	0.98	456.223	765.293	630.587	229.97	0.746273	0.466954	-0.988295	0.719488	0.544864	0.774625	K00660|1|0.0|671|zma:100274415|chalcone synthase [EC:2.3.1.74]		-	GO:0016747//transferase activity, transferring acyl groups other than amino-acyl groups	GO:0009699//phenylpropanoid biosynthetic process	COCehwD008089.1	CN01_15P005920
CN01_15P003340	CN01_15G003340	#N/A	#N/A	PSAN,LOC103720518,CFP56_67438,LOC104606730	#N/A	CHE	441	complete	ISS_2	IPR008796	Photosystem I reaction center subunit N, chloroplastic	photosystem I reaction center subunit PSI-N, chloroplast, putative / PSI-N, putative (PSAN)	LOC_Os12g08770	0.76	0.88	0.84	927.09	755.64	1759.96	1822.94	-0.29501	0.924759	0.97549	0.438053	0.75092	0.774625	K02701|1|5e-48|187|pop:POPTR_715775|photosystem I subunit PsaN		GO:0009534//chloroplast thylakoid;GO:0009522//photosystem I	GO:0005515//protein binding	GO:0009767//photosynthetic electron transport chain	COCehwD023781.1	CN01_15P003340
CN01_01P008150	CN01_01G008150	#N/A	#N/A	RPL7D,RPL7B,RPL7C,RPL7A,LOC103701498,103980714,LOC103714103	#N/A	CHE	699	complete	ISS_2	IPR016082,IPR005998,IPR012988,IPR036919,IPR018038,IPR023106,IPR035808,IPR039699	60S ribosomal protein L7-4	Ribosomal protein L30/L7 family protein	LOC_Os04g51630	0.9	0.88	0.83	377.663	754.303	305.783	351.315	0.998044	-0.304591	-0.104336	0.792824	0.407059	0.199009	K02937|1|5e-85|311|zma:100191368|large subunit ribosomal protein L7e		GO:0030529//ribonucleoprotein complex	GO:0005198//structural molecule activity	GO:0010467//gene expression	COCehwD001708.1	CN01_01P008150
CN01_06P007160	CN01_06G007160	#N/A	#N/A	ANT18,DFR,LOC103712715,103979760	#N/A	CHE	1080	complete	ISS_1	IPR001509,IPR036291	dihydroflavonol 4-reductase	NAD(P)-binding Rossmann-fold superfamily protein	LOC_Os04g53810	0.38	0.89	0.97	404.78	752.55	625.6	284.795	0.894649	0.628103	-0.507214	0.762247	0.639688	0.582895	K13082|1|7e-141|498|bdi:100845692|bifunctional dihydroflavonol 4-reductase/flavanone 4-reductase [EC:1.1.1.219 1.1.1.234]		-	GO:0048037//cofactor binding	GO:0008152//metabolic process	COCehwD003497.1	CN01_06P007160
CN01_08P006060	CN01_08G006060	#N/A	#N/A	At2g30620,H1-II,LOC103697573,JCGZ_06500,103977977,Csa_6G505280	#N/A	CHE	633	complete	ISS_2	IPR005818,IPR036390,IPR005819,IPR036388	Histone H1	histone H1-3	LOC_Os06g04020.1	0.74	0.38	0.35	470.797	747.91	488.457	492.65	0.667761	0.0531265	0.065459	0.688608	0.126753	0.156696	K11275|1|2e-24|110|pop:POPTR_679169|histone H1/5		GO:0000785//chromatin;GO:0043231//intracellular membrane-bounded organelle	GO:0003676//nucleic acid binding	GO:0050896//response to stimulus;GO:0034728//nucleosome organization	COCehwD021720.1	CN01_08P006060
CN01_06P016350	CN01_06G016350	#N/A	#N/A	ATPC,ATPC1,LOC103724196,LOC103704469,ATPC_1	#N/A	CHE	972	complete	ISS_1	IPR035968,IPR000131,IPR023632	ATP synthase subunit gamma, mitochondrial	gamma subunit of Mt ATP synthase	LOC_Os10g17280.1	0.82	1	1	375.74	746.56	545.64	597.895	0.990524	0.538215	0.670157	0.789175	0.591197	0.670567	K02136|1|7e-152|534|sbi:SORBI_01g042930|F-type H+-transporting ATPase subunit gamma [EC:3.6.3.14]		-	-	-	COCehwD014157.1	CN01_06P016350
CN01_02P007790	CN01_02G007790	#N/A	#N/A	ACMD2_01093,LOC104594882,CFP56_46982,FSB_LOCUS60166	#N/A	CHE	807	complete	ISS_1	IPR000504,IPR012677,IPR035979	29 kDa ribonucleoprotein A, chloroplastic	chloroplast RNA-binding protein 29	LOC_Os07g43810	0.75	0.62	0.64	531.983	739.55	267.86	255.63	0.475267	-0.989902	-1.05732	0.583047	0.767716	0.7949	K11294|1|9e-35|145|smo:SELMODRAFT_15428|nucleolin;K13126|5|6e-21|99.4|ath:AT4G34110|polyadenylate-binding protein		-	-	-	COCehwD018512.1	CN01_02P007790
CN01_04P008870	CN01_04G008870	#N/A	#N/A	At5g12110,Os07g0662500,At5g19510,EF1B,LOC103711704,PHAVU_006G019800g	#N/A	CHE	675	complete	ISS_1	IPR014038,IPR036282,IPR014717,IPR001326,IPR036219	elongation factor 1-beta	Glutathione S-transferase, C-terminal-like,Translation elongation factor EF1B/ribosomal protein S6	LOC_Os07g46750	0.74	1	1	910.463	729.123	458.86	548.455	-0.320438	-0.988547	-0.731228	0.456559	0.769274	0.695724	K03232|1|5e-59|225|osa:4344188|elongation factor 1-beta		-	-	-	COCehwD020114.1	CN01_04P008870
CN01_scaffold052778P000010	CN01_scaffold052778G000010	#N/A	#N/A	unknown_gene	#N/A	CHE	186	missing_functional_completeness	ISS_5	#N/A	hypothetical protein	Endonuclease/exonuclease/phosphatase family protein	LOC_Os08g41270.2	0.33	0.66	0.04	599.15	721.45	1112.63	858.945	0.267982	0.892989	0.519649	0.408117	0.737165	0.591302	-		-	-	-	COCehwD020181.1	COCehwD020181.1
CN01_09P007560	CN01_09G007560	#N/A	#N/A	At3g61260,DBP,REM4.1,LOC103719427,LOC103503454,Csa_3G915100	#N/A	CHE	558	complete	ISS_2	IPR005516,IPR005518	Remorin	Remorin family protein	LOC_Os03g02040.1	0.54	0.98	0.98	609.197	716.297	838.63	1039.66	0.233649	0.461126	0.771139	0.366373	0.539245	0.710784	-		GO:0016020//membrane	GO:0043168	-	COCehwD021873.1	CN01_09P007560
CN01_02P008210	CN01_02G008210	#N/A	#N/A	RPS5,RPS5A,RPS5B,LOC103709422,LOC103698031,103971520	#N/A	CHE	588	complete	ISS_1	IPR005716,IPR036823,IPR020606,IPR000235,IPR023798	40S ribosomal protein S5	ribosomal protein 5B	LOC_Os11g29190.2	0.95	0.98	0.96	865.357	706.1	642.187	791.45	-0.293422	-0.430302	-0.128797	0.428127	0.518699	0.235305	K02989|1|3e-100|362|osa:4350516|small subunit ribosomal protein S5e		GO:0030529//ribonucleoprotein complex	GO:0003676//nucleic acid binding;GO:0005198//structural molecule activity	GO:0010467//gene expression	COCehwD018135.1	CN01_02P008210
CN01_09P006190	CN01_09G006190	#N/A	#N/A	RPL23A,RPL23AB,LOC103717303,LOC103723931,LOC103712982,CDL12_12290	#N/A	CHE	468	complete	ISS_1	IPR019985,IPR001014,IPR013025,IPR012677,IPR005633,IPR012678	60S ribosomal protein L23A	ribosomal protein L23AB	LOC_Os01g24690	0.88	0.96	0.97	403.287	696.56	267.27	324.8	0.788442	-0.593508	-0.312254	0.731352	0.619514	0.425407	K02893|1|1e-54|209|gmx:100777933|large subunit ribosomal protein L23Ae		GO:0030529//ribonucleoprotein complex	GO:0003723//RNA binding	-	COCehwD020586.1	CN01_09P006190
CN01_scaffold033004P000010	CN01_scaffold033004G000010	#N/A	#N/A	CHS6,CHS2,CHS3,CHS7,LOC103720741,LOC103698502,LOC103720740,LOC103712379	#N/A	CHE	1182	complete	ISS_1	IPR001099,IPR012328,IPR016039,IPR018088,IPR011141	chalcone synthase 3	Chalcone and stilbene synthase family protein	LOC_Os11g32650.1	0.86	0.99	0.97	549.223	677.467	776.98	386.055	0.302757	0.500485	-0.508587	0.437584	0.567699	0.58398	K00660|1|0.0|672|sbi:SORBI_05g020230|chalcone synthase [EC:2.3.1.74]		-	GO:0016747//transferase activity, transferring acyl groups other than amino-acyl groups	GO:0009699//phenylpropanoid biosynthetic process	COCehwD014763.1	CN01_U03P013080
CN01_contig69520053P000010	CN01_contig69520053G000010	#N/A	#N/A	PSAG,LOC103711977,LOC103718464,103983899	#N/A	CHE	453	complete	ISS_1	IPR023618,IPR016370,IPR000549,IPR017494	photosystem I reaction center subunit V, chloroplastic	photosystem I subunit G	LOC_Os09g30340	0.69	0.99	0.99	853.917	657.67	1412.98	1275.22	-0.376731	0.726574	0.578585	0.509291	0.686848	0.626345	K08905|1|9e-54|206|vvi:100244683|photosystem I subunit V		GO:0031224//intrinsic to membrane;GO:0009522//photosystem I;GO:0009526//plastid envelope;GO:0009534//chloroplast thylakoid	-	GO:0009767//photosynthetic electron transport chain;GO:0031647//regulation of protein stability;GO:0042548//regulation of photosynthesis, light reaction;GO:0006740//NADPH regeneration	COCehwD000633.1	CN01_U03P016960
CN01_02P013640	CN01_02G013640	#N/A	#N/A	TUFB1,TUFA,LOC103722824,LOC103717558,CDL15_Pgr008993,CFOL_v3_08654	#N/A	CHE	1449	complete	ISS_1	IPR041709,IPR005225,IPR009001,IPR000795,IPR004541,IPR004161,IPR027417,IPR004160,IPR009000,IPR031157,IPR033720	elongation factor TuA, chloroplastic	RAB GTPase homolog E1B	LOC_Os02g38210.1	0.86	0.86	0.89	494.537	653.307	917.51	769.255	0.401683	0.891646	0.637384	0.524555	0.736821	0.654829	K02358|1|0.0|703|vvi:100245586|elongation factor Tu		GO:0009536//plastid	GO:0017111//nucleoside-triphosphatase activity;GO:0008135//translation factor activity, nucleic acid binding;GO:0032561//guanyl ribonucleotide binding	GO:0006412//translation;GO:0009207	COCehwD018397.1	CN01_02P013640
CN01_13P001080	CN01_13G001080	#N/A	#N/A	unknown_gene	#N/A	CHE	204	missing_functional_completeness	ISS_5	#N/A	hypothetical protein	#N/A	ChrUn.fgenesh.mRNA.45	0.33	0.57	0.08	361.893	652.393	522.91	187.085	0.850178	0.530998	-0.951871	0.750293	0.585509	0.761786	-		-	-	-	COCehwD006205.1	CN01_13P001080
CN01_03P001570	CN01_03G001570	#N/A	#N/A	PR,AKR1,At1g60710,At1g60750,LOC103724138,LOC103716356	#N/A	CHE	822	complete	ISS_2	IPR023210,IPR036812	Perakine reductase	NAD(P)-linked oxidoreductase superfamily protein	LOC_Os10g28320	0.64	0.97	0.82	578.063	648.463	586.11	307.775	0.165797	0.0199439	-0.909352	0.298604	0.0929756	0.749332	K05275|1|2e-24|111|zma:100272747|pyridoxine 4-dehydrogenase [EC:1.1.1.65];K00064|2|2e-17|87.8|vcn:VOLCADRAFT_93987|D-threo-aldose 1-dehydrogenase [EC:1.1.1.122]		-	GO:0004033//aldo-keto reductase (NADP) activity	GO:0008152//metabolic process	COCehwD025146.1	CN01_03P001570
CN01_01P012560	CN01_01G012560	#N/A	#N/A	At5g10770,AED1,APF2,ASPG1,LOC103718454,LOC103711981,ACMD2_10896,BAE44_0019819	#N/A	CHE	1041	fragment	ISS_3	IPR001969,IPR033121,IPR021109,IPR001461,IPR032861,IPR032799	putative Aspartyl protease family protein At5g10770	Eukaryotic aspartyl protease family protein	LOC_Os02g48900	0.68	0.99	0.74	647.5	634.82	739.567	422.68	-0.0285326	0.1918	-0.615314	0.106064	0.300714	0.645891	K00924|1|6e-28|123|ath:AT5G22850|[EC:2.7.1.-]		GO:0031410//cytoplasmic vesicle	GO:0004175//endopeptidase activity	GO:0019538//protein metabolic process	COCehwD010125.1	CN01_01P012560
CN01_04P002130	CN01_04G002130	#N/A	#N/A	At5g02560,Os05g0113900,OsI_017523,LOC103705949,LOC103696590,AXF42_Ash017710	#N/A	CHE	444	complete	ISS_1	IPR002119,IPR032454,IPR009072,IPR032458,IPR007125	histone H2A	histone H2A 12	LOC_Os05g02300.1	0.9	0.9	0.85	587.093	634.297	626.997	647.19	0.111568	0.0948679	0.140599	0.217123	0.18862	0.24733	K11251|1|9e-40|160|vvi:100265411|histone H2A		GO:0000785//chromatin;GO:0043231//intracellular membrane-bounded organelle	GO:0003676//nucleic acid binding	GO:0034728//nucleosome organization	COCehwD022657.1	CN01_04P002130
CN01_scaffold001962P000100	CN01_scaffold001962G000100	#N/A	#N/A	rps6,RPS6B,RPS6A,RPS6,LOC103717963,LOC103701774	#N/A	CHE	519	complete	ISS_2	IPR001377	40S ribosomal protein S6	Ribosomal protein S6e	LOC_Os03g27260	0.91	0.95	0.67	609.43	631.397	396.66	468.47	0.0510861	-0.619558	-0.379504	0.132834	0.635392	0.488579	K02991|1|4e-52|201|gmx:100804076|small subunit ribosomal protein S6e		GO:0030529//ribonucleoprotein complex	-	-	COCehwD008562.1	CN01_U02P002950
CN01_10P006530	CN01_10G006530	#N/A	#N/A	RPL9,RPL9D,RPL9B,LOC103703525,ACMD2_15022	#N/A	CHE	570	complete	ISS_1	IPR020040,IPR036789,IPR002359,IPR000702	60S ribosomal protein L9	Ribosomal protein L6 family	LOC_Os09g31180	0.89	0.99	0.99	379.367	630.04	301.45	256.38	0.731851	-0.331674	-0.565309	0.711398	0.435562	0.616041	K02940|1|2e-75|279|osa:4347422|large subunit ribosomal protein L9e		GO:0030529//ribonucleoprotein complex	GO:0003723//RNA binding;GO:0005198//structural molecule activity	GO:0010467//gene expression	COCehwD027477.1	CN01_10P006530
CN01_scaffold000566P000050	CN01_scaffold000566G000050	#N/A	#N/A	ARD2,ARD1,LOC103698629,103975990,LOC101774587	#N/A	CHE	1167	modules	ISS_3	IPR004313,IPR014710,IPR027496,IPR008501,IPR011051	putative 1,2-dihydroxy-3-keto-5-methylthiopentene dioxygenase 2	RmlC-like cupins superfamily protein	LOC_Os03g06620.1	0.82	0.51	0.99	397.617	628.753	391.767	411.735	0.661116	-0.0213836	0.0503379	0.684145	0.0929067	0.125939	K08967|1|9e-97|352|osa:4331707|1,2-dihydroxy-3-keto-5-methylthiopentene dioxygenase [EC:1.13.11.53 1.13.11.54]		-	GO:0043169//cation binding;GO:0016701//oxidoreductase activity, acting on single donors with incorporation of molecular oxygen	GO:0043102	COCehwD021272.2	CN01_U01P014930
CN01_09P010210	CN01_09G010210	#N/A	#N/A	PAL,PAL1,LOC103718264	#N/A	CHE	1674	complete	ISS_1	IPR005922,IPR024083,IPR023144,IPR022313,IPR001106,IPR008948	phenylalanine ammonia-lyase	PHE ammonia lyase 1	LOC_Os02g41650	0.81	1	1	555.853	617.367	551.42	282.2	0.151423	-0.0115527	-0.977986	0.270165	0.0813442	0.772466	K10775|1|0.0|969|rcu:RCOM_1355480|phenylalanine ammonia-lyase [EC:4.3.1.24]		GO:0044424//intracellular part	GO:0016840	GO:0006558//L-phenylalanine metabolic process	COCehwD024536.1	CN01_09P010210
CN01_05P002090	CN01_05G002090	#N/A	#N/A	NRP1,Os05g0583200,ADC,At3g03100,LOC103710224,TCM_011590,VITISV_009130,VIT_01s0011g00830	#N/A	CHE	459	complete	ISS_2	IPR040294	nodulin-related protein 1	Class II aminoacyl-tRNA and biotin synthetases superfamily protein	LOC_Os01g27520	0.25	0.96	0.36	918.33	616.977	1245.36	1247.62	-0.573797	0.439478	0.4421	0.639007	0.526228	0.536128	-		GO:0009532//plastid stroma;GO:0009526//plastid envelope;GO:0016020//membrane	GO:0005515//protein binding	GO:0010102//lateral root morphogenesis;GO:0048869//cellular developmental process;GO:0051707//response to other organism;GO:0010038//response to metal ion;GO:0006970//response to osmotic stress;GO:0009755//hormone-mediated signaling pathway	COCehwD027342.1	CN01_05P002090
CN01_15P005760	CN01_15G005760	#N/A	#N/A	CD4A,CD4B,CLPC1,LOC103708061,LOC107771216,CD4B_0,LOC104220376	#N/A	CHE	2415	complete	ISS_1	IPR003593,IPR036628,IPR018368,IPR041546,IPR003959,IPR001943,IPR027417,IPR001270,IPR028299,IPR019489,IPR004176	ATP-dependent Clp protease ATP-binding subunit ClpA, chloroplastic	CLPC homologue 1	LOC_Os04g32560.1	0.9	1	0.91	415.227	611.07	461.413	540.03	0.557439	0.152161	0.37914	0.632834	0.256312	0.488319	K03696|1|0.0|1342|gmx:100796195|ATP-dependent Clp protease ATP-binding subunit ClpC		GO:0009536//plastid	GO:0016788//hydrolase activity, acting on ester bonds;GO:0003676//nucleic acid binding;GO:0016462//pyrophosphatase activity;GO:0032559	GO:0006281//DNA repair	COCehwD022861.1	CN01_15P005760
CN01_contig69200135P000010	CN01_contig69200135G000010	#N/A	#N/A	unknown_gene	#N/A	CHE	186	missing_functional_completeness	ISS_5	#N/A	hypothetical protein	wall-associated kinase 2	LOC_Os11g47140.1	0.46	0.41	0.04	588.473	605.517	481.357	438.3	0.0411896	-0.289871	-0.425058	0.119929	0.399371	0.527378	-		-	-	-	COCehwD000199.1	COCehwD000199.1
CN01_04P015080	CN01_04G015080	#N/A	#N/A	PPF-1,ALB3,ALB4,ALB3.2,LOC103703448,ACMD2_15696,103996907	#N/A	CHE	1356	complete	ISS_1	IPR028055,IPR001708	inner membrane protein PPF-1, chloroplastic	63 kDa inner membrane family protein	LOC_Os01g05800.1	0.77	0.76	0.74	507.44	604.663	560.42	530.98	0.252895	0.143271	0.0654203	0.387769	0.245818	0.156758	K03217|1|3e-172|602|vvi:100260431|preprotein translocase subunit YidC		GO:0031224//intrinsic to membrane;GO:0009534//chloroplast thylakoid	GO:0005488//binding;GO:0008320//protein transmembrane transporter activity	GO:0009668;GO:0007569//cell aging;GO:0006612//protein targeting to membrane	COCehwD020339.1	CN01_04P015080
CN01_09P003340	CN01_09G003340	#N/A	#N/A	BLH4,BEL1,BLH2,BLH3,LOC103712213,LOC103710692,103971826,LOC103702686	#N/A	CHE	900	fragment	ISS_3	IPR006563	putative homeobox protein BEL1	POX (plant homeobox) family protein	LOC_Os03g03260.1	0.43	0.95	0.45	717.167	599.993	350.213	420.42	-0.257362	-1.03407	-0.770477	0.397991	0.781464	0.710065	-		-	-	-	COCehwD022776.1	CN01_09P003340
CN01_06P011710	CN01_06G011710	#N/A	#N/A	Os03g0337600,WRKY16,AGT1,GOBAR_AA04092,GOBAR_DD29727,GOBAR_DD23637,GOBAR_DD23878	#N/A	CHE	669	missing_functional_completeness	ISS_4	IPR013989	conserved hypothetical protein	DCD (Development and Cell Death) domain protein	LOC_Os05g41930.2	0.85	0.5	0.36	836.017	596.417	737.927	805.33	-0.487211	-0.180054	-0.0539516	0.591428	0.289765	0.126199	-		-	-	-	COCehwD017206.1	CN01_06P011710
CN01_05P008200	CN01_05G008200	#N/A	#N/A	CPN20,CPN21,CPN10,LOC103702312,LOC103709324,ACMD2_24058	#N/A	CHE	777	complete	ISS_1	IPR017416,IPR011032,IPR020818,IPR018369,IPR037124	20 kDa chaperonin, chloroplastic	chaperonin 20	LOC_Os06g09679	0.68	0.99	1	352.913	583.29	255.793	218.985	0.724899	-0.464335	-0.688482	0.707169	0.536646	0.676126	K04078|1|1e-44|177|cre:CHLREDRAFT_188610|chaperonin GroES		-	-	-	COCehwD015775.1	CN01_05P008200
CN01_scaffold012456P000010	CN01_scaffold012456G000010	#N/A	#N/A	ANR,BAN,LOC103698208,LOC104604944	#N/A	CHE	693	fragment	ISS_3	IPR036291,IPR001509	putative Anthocyanidin reductase ((2S)-flavan-3-ol-forming)	NAD(P)-binding Rossmann-fold superfamily protein	LOC_Os04g53800	0.54	0.98	0.66	492.707	573.483	495.81	308.625	0.219023	0.00905838	-0.674874	0.354923	0.0812821	0.669816	K08695|1|9e-73|271|vvi:100232981|anthocyanidin reductase [EC:1.3.1.77]		-	GO:0048037//cofactor binding	GO:0008152//metabolic process	COCehwD003559.1	CN01_U03P011100
CN01_scaffold007470P000050	CN01_scaffold007470G000050	#N/A	#N/A	RPS3C,RPS3A,RPS3B,rps3,LOC103703275,LOC103712746,LOC103705774	#N/A	CHE	819	complete	ISS_2	IPR036419,IPR015946,IPR001351,IPR009019,IPR005703,IPR004044,IPR018280,IPR004087	40S ribosomal protein S3-3	Ribosomal protein S3 family protein	LOC_Os07g41750	0.92	0.83	0.94	399	572.263	314.4	309.205	0.52029	-0.343788	-0.367825	0.610106	0.445242	0.478442	K02985|1|2e-117|419|gmx:100795045|small subunit ribosomal protein S3e		GO:0030529//ribonucleoprotein complex	GO:0003676//nucleic acid binding;GO:0005198//structural molecule activity	GO:0010467//gene expression	COCehwD024764.1	CN01_U02P012500
CN01_16P003320	CN01_16G003320	#N/A	#N/A	GST3,GSTF8,GSTF13,LOC103707284,ACMD2_09046,LOC103715303	#N/A	CHE	621	complete	ISS_1	IPR004045,IPR004046,IPR036249,IPR034347,IPR036282,IPR010987	glutathione S-transferase 3	Glutathione S-transferase family protein	LOC_Os01g70770	0.64	0.97	0.89	386.267	560.997	366.88	384.385	0.538395	-0.0742889	-0.00704515	0.621225	0.153836	0.0697434	K00799|1|2e-70|263|osa:4326828|glutathione S-transferase [EC:2.5.1.18]		-	-	-	COCehwD009424.1	CN01_16P003320
CN01_scaffold003858P000010	CN01_scaffold003858G000010	#N/A	#N/A	Os05g0108800,CYTB5-B,LOC103709958,LOC103722828,LOC104589383,LOC104602193	#N/A	CHE	405	complete	ISS_1	IPR036400,IPR018506,IPR001199	cytochrome b5	cytochrome B5 isoform B	LOC_Os05g01820	0.85	0.96	0.94	366.583	559.353	405.26	272.405	0.609619	0.144707	-0.428388	0.659507	0.245398	0.525855	K00360|1|2e-15|79.0|ppp:PHYPADRAFT_184973|nitrate reductase (NADH) [EC:1.7.1.1];K13076|4|3e-13|71.6|rcu:RCOM_1617140|delta8-fatty-acid desaturase [EC:1.14.19.4]		-	GO:0008940//nitrate reductase activity;GO:0005506//iron ion binding	GO:0006091//generation of precursor metabolites and energy	COCehwD016670.1	CN01_U02P009930
CN01_12P007220	CN01_12G007220	#N/A	#N/A	CHI,LOC103696411,ACMD2_09400,CHI2	#N/A	CHE	408	complete	ISS_2	IPR016089,IPR016087,IPR036298,IPR016088	Chalcone-flavonone isomerase family protein	Chalcone-flavanone isomerase family protein	LOC_Os03g60509	0.75	0.87	0.51	431.077	557.817	507.073	278.995	0.371847	0.23425	-0.627705	0.5	0.341124	0.648279	K01859|1|5e-42|167|zma:100276821|chalcone isomerase [EC:5.5.1.6]		-	GO:0016872//intramolecular lyase activity	GO:0044249//cellular biosynthetic process	COCehwD011019.1	CN01_12P007220
CN01_03P012970	CN01_03G012970	#N/A	#N/A	STR4,TROL,STR4A,LOC103702952,ACMD2_04827,STR4_2,LOC104600333	#N/A	CHE	1368	complete	ISS_2	IPR036873	rhodanese-like domain-containing protein 4, chloroplastic	thylakoid rhodanese-like	LOC_Os02g15750.1	0.59	0.6	0.55	391.47	546.293	602.18	548.68	0.480774	0.621293	0.487063	0.582344	0.635323	0.569368	-		GO:0009534//chloroplast thylakoid	GO:0005488//binding	GO:0006952//defense response;GO:0009767//photosynthetic electron transport chain	COCehwD021641.1	CN01_03P012970
CN01_11P011980	CN01_11G011980	#N/A	#N/A	GAPN,GPN1,LOC103714234,B456_001G031700,ALDH11A3,LOC107953798	#N/A	CHE	1491	complete	ISS_1	IPR016160,IPR016161,IPR016163,IPR029510,IPR016162,IPR015590	NADP-dependent glyceraldehyde-3-phosphate dehydrogenase	aldehyde dehydrogenase 11A3	LOC_Os08g34210	0.9	1	0.99	516.403	531.007	975.003	1018.43	0.0402317	0.916909	0.979784	0.11986	0.750128	0.773905	K00131|1|0.0|937|gmx:100789100|glyceraldehyde-3-phosphate dehydrogenase (NADP) [EC:1.2.1.9]		GO:0044424//intracellular part	-	GO:0008152//metabolic process	COCehwD009192.1	CN01_11P011980
CN01_02P012410	CN01_02G012410	#N/A	#N/A	RPL5,RPL5A,RPL5B,LOC103708588,LOC103715029,LOC103719675	#N/A	CHE	918	complete	ISS_1	IPR005485,IPR025607	60S ribosomal protein L5	ribosomal protein L5	LOC_Os01g67134	0.81	0.95	0.95	374.227	516.61	201.74	254.585	0.465163	-0.891415	-0.555765	0.576025	0.733656	0.611181	K02932|1|3e-125|446|pop:POPTR_827713|large subunit ribosomal protein L5e		GO:0030529//ribonucleoprotein complex	GO:0019843//rRNA binding;GO:0005198//structural molecule activity	GO:0010467//gene expression	COCehwD007863.1	CN01_02P012410
CN01_07P014820	CN01_07G014820	ABA	LEA,DHN	COR410,DHN1,COR47,ERD10,LOC103713175,LOC103708703,DHN-1	16	CHE	705	complete	ISS_2	IPR030513,IPR000167	Dehydrin COR410	cold-regulated 47	LOC_Os02g44870.1	0.49	0.95	0.9	453.197	511.587	780.05	743.695	0.174841	0.783429	0.714574	0.298363	0.704029	0.687432	-		-	-	-	COCehwD022511.1	CN01_07P014820
CN01_01P005150	CN01_01G005150	#N/A	#N/A	FAD6,LOC103714237,ACMD2_23280,103974437	#N/A	CHE	1320	complete	ISS_1	IPR005804	omega-6 fatty acid desaturase, chloroplastic	fatty acid desaturase 6	LOC_Os08g34220.1	0.74	0.99	0.94	411.72	509.013	662.237	694.74	0.30604	0.685683	0.75481	0.446019	0.669831	0.70266	K10255|1|0.0|712|vvi:100248377|omega-6 fatty acid desaturase (delta-12 desaturase) [EC:1.14.19.-]		-	-	-	COCehwD002589.1	CN01_01P005150
CN01_05P007290	CN01_05G007290	#N/A	#N/A	RPL34,RPL34A,RPL34B,LOC103716406,LOC103703165,103972877,103969576	#N/A	CHE	363	complete	ISS_1	IPR008195,IPR018065,IPR038562	60S ribosomal protein L34	Ribosomal protein L34e superfamily protein	LOC_Os09g24690.1	0.95	0.98	0.99	385.31	502.587	327.207	388.075	0.383353	-0.235817	0.0103159	0.508215	0.350681	0.0699207	K02915|1|1e-48|188|zma:100193910|large subunit ribosomal protein L34e		-	-	-	COCehwD025951.1	CN01_05P007290
CN01_04P011240	CN01_04G011240	#N/A	#N/A	RPS1,PNP2,RRP5,LOC103701027,103998095,MANES_15G003100,RPS4	#N/A	CHE	1179	complete	ISS_2	IPR022967,IPR012340,IPR003029	30S ribosomal protein S1, chloroplastic	ribosomal protein S1	LOC_Os03g20100.1	0.69	0.95	0.98	413.427	498.217	425.687	376.775	0.269142	0.0421605	-0.133928	0.407372	0.115508	0.234741	K02945|1|5e-167|585|rcu:RCOM_1002410|small subunit ribosomal protein S1		GO:0009532//plastid stroma;GO:0030529//ribonucleoprotein complex	GO:0003676//nucleic acid binding;GO:0005198//structural molecule activity	GO:0010467//gene expression	COCehwD013887.1	CN01_04P011240
CN01_scaffold014710P000030	CN01_scaffold014710G000030	ABA	LEA,DHN	LEA5,LEA5-D,LEA41,LEA5-A,LOC103703621,LOC103707229,ACMD2_11932	16	CHE	306	complete	ISS_2	IPR004926	Late embryogenesis abundant protein Lea5	senescence-associated gene 21	LOC_Os02g35650	0.35	0.86	0.96	875.697	494.333	802.657	1172.54	-0.824947	-0.125648	0.421128	0.741112	0.234663	0.521861	-		-	-	GO:0007275//multicellular organismal development;GO:0006950//response to stress;GO:0009725//response to hormone stimulus	COCehwD005544.1	CN01_U02P015020
CN01_03P010620	CN01_03G010620	#N/A	#N/A	Os05g0567100,APA1,APA2,LOC103703338,ASPR_0,Os05g0567100_0,ASPR_1	#N/A	CHE	1290	complete	ISS_2	IPR033121,IPR021109,IPR001969,IPR001461	Aspartic proteinase	aspartic proteinase A1	LOC_Os01g47410.1	0.645	0.93	0.72	436.527	490.927	880.007	696.85	0.169438	1.01144	0.674778	0.298218	0.778017	0.671058	K08245|1|1e-89|328|gmx:100779619|phytepsin [EC:3.4.23.40]		GO:0031410//cytoplasmic vesicle	GO:0004175//endopeptidase activity	GO:0019538//protein metabolic process	COCehwD027569.1	CN01_03P010620
CN01_11P002120	CN01_11G002120	#N/A	#N/A	GAPC,GAPC3,GAPC2,LOC103715181,LOC103714477,LOC103715182	#N/A	CHE	1023	complete	ISS_1	IPR020830,IPR020828,IPR036291,IPR006424,IPR020831,IPR020829	Glyceraldehyde-3-phosphate dehydrogenase, cytosolic	glyceraldehyde-3-phosphate dehydrogenase C2	LOC_Os04g40950.1	0.9	0.97	0.98	518.633	487.167	401.92	372.055	-0.0902995	-0.367807	-0.479199	0.191981	0.470256	0.561483	K00134|1|1e-166|583|osa:4336216|glyceraldehyde 3-phosphate dehydrogenase [EC:1.2.1.12]		-	-	-	COCehwD021374.1	CN01_11P002120
CN01_02P015630	CN01_02G015630	#N/A	#N/A	CD4A,CD4B,CLPC1,LOC103697332,LOC103708061,CD4A_4	#N/A	CHE	1983	complete	ISS_1	IPR019489,IPR027417,IPR001270,IPR001943,IPR028299,IPR003959,IPR003593,IPR041546	ATP-dependent Clp protease ATP-binding subunit ClpA, chloroplastic	CLPC homologue 1	LOC_Os04g32560.1	0.89	1	0.75	364.527	478.403	440.33	423.28	0.392203	0.272561	0.215588	0.516368	0.380493	0.336525	K03696|1|0.0|1179|gmx:100796195|ATP-dependent Clp protease ATP-binding subunit ClpC		-	-	-	COCehwD001609.1	CN01_02P015630
CN01_scaffold001511P000010	CN01_scaffold001511G000010	#N/A	#N/A	Os12g0624000,Os12g0623900,METE,LOC103698186,LOC103698689,LOC103707070,103983080	#N/A	CHE	2343	complete	ISS_1	IPR006276,IPR038071,IPR002629,IPR013215	5-methyltetrahydropteroyltriglutamate--homocysteine methyltransferase 1	Cobalamin-independent synthase family protein	LOC_Os12g42884.1	0.85	1	0.99	495.097	475.69	339.28	242.66	-0.0576885	-0.545234	-1.02877	0.145953	0.596009	0.788757	K00549|1|0.0|1285|bdi:100824461|5-methyltetrahydropteroyltriglutamate--homocysteine methyltransferase [EC:2.1.1.14]		-	GO:0046914//transition metal ion binding;GO:0008172	GO:0006730//one-carbon metabolic process;GO:0000097//sulfur amino acid biosynthetic process	COCehwD005939.1	CN01_U01P009200
CN01_06P017040	CN01_06G017040	#N/A	#N/A	SBT1.7,SBT1.8,SBT1.3,SBT1.4,LOC103700809,LOC103709209,ARA12,ACMD2_05567	#N/A	CHE	1395	fragment	ISS_3	IPR036852,IPR003137,IPR000209,IPR041469,IPR023828	putative Subtilisin-like protease SBT1.7	Subtilase family protein	LOC_Os03g40830.1	0.72	1	0.61	728.22	473.55	644.25	606.82	-0.620858	-0.176754	-0.263106	0.665742	0.2896	0.379339	-		-	-	-	COCehwD021105.1	CN01_06P017040
CN01_13P002950	CN01_13G002950	#N/A	#N/A	ANN1,ANNAT7,ANN2,ANN6,LOC103710539,LOC103707899,ACMD2_14890,ACMD2_11181	#N/A	CHE	948	complete	ISS_1	IPR018252,IPR037104,IPR018502,IPR001464,IPR009118	annexin D1	annexin 1	LOC_Os06g11800.1	0.74	0.99	0.99	444.36	472.157	391.213	456.145	0.0875367	-0.183773	0.0377635	0.191857	0.288917	0.113413	-		-	-	-	COCehwD011006.1	CN01_13P002950
CN01_08P006050	CN01_08G006050	#N/A	#N/A	H3,HTR4,F383_36245,ARALYDRAFT_487928	#N/A	CHE	411	complete	ISS_1	IPR009072,IPR000164,IPR007125	Histone H3.3	Histone superfamily protein	LOC_Os03g27310.2	1	0.99	0.99	404.147	471.823	321.507	316.96	0.223368	-0.33003	-0.350578	0.354564	0.435831	0.463016	K11253|1|1e-71|266|mtr:MTR_4g097170|histone H3		GO:0000785//chromatin;GO:0043231//intracellular membrane-bounded organelle	GO:0003676//nucleic acid binding	GO:0034728//nucleosome organization	COCehwD021719.1	CN01_08P006050
CN01_04P004780	CN01_04G004780	#N/A	#N/A	RPT3,RPT2A,LOC103705967,LOC103716683,LOC103496251,LOC109002408	#N/A	CHE	1257	complete	ISS_1	IPR027417,IPR032501,IPR003960,IPR035256,IPR003959,IPR003593,IPR005937,IPR041569	26S proteasome regulatory subunit 6B	regulatory particle triple-A ATPase 3	LOC_Os02g21970.1	0.96	0.92	0.91	510.11	470.91	465.027	440.665	-0.115357	-0.133495	-0.211126	0.229725	0.234325	0.326095	K03063|1|0.0|749|vvi:100246786|26S proteasome regulatory subunit T3		GO:0005838//proteasome regulatory particle;GO:0043231//intracellular membrane-bounded organelle;GO:0030312//external encapsulating structure	GO:0042623//ATPase activity, coupled;GO:0032559	GO:0019941//modification-dependent protein catabolic process	COCehwD022735.1	CN01_04P004780
CN01_scaffold000955P000030	CN01_scaffold000955G000030	#N/A	#N/A	At2g30620,LOC103697861,At2g30620_0,MA16_Dca011624,LOC103723452	#N/A	CHE	876	missing_functional_completeness	ISS_4	IPR005818,IPR005819,IPR036390,IPR036388	conserved hypothetical protein	winged-helix DNA-binding transcription factor family protein	LOC_Os07g08710.2	0.65	0.26	0.35	361.477	469.133	361.547	369.175	0.376095	0.000279351	0.0304023	0.507967	0.0626594	0.100083	K11275|1|2e-14|77.8|sbi:SORBI_01g005010|histone H1/5		GO:0043229//intracellular organelle	-	-	COCehwD027627.1	CN01_U01P003520
CN01_14P010220	CN01_14G010220	#N/A	#N/A	petM,FHL,SBT4.7,LOC103723892,AXF42_Ash000158,LOC104601975	#N/A	CHE	375	complete	ISS_2	IPR012595	Cytochrome b6-f complex subunit 7	cytochrome b6f complex subunit (petM), putative	LOC_Os03g55720	0.54	0.99	0.99	607.6	469.03	866.273	737.52	-0.373442	0.5117	0.27956	0.5002	0.575822	0.3983	-		-	-	-	COCehwD008134.1	CN01_14P010220
CN01_scaffold001341P000010	CN01_scaffold001341G000010	#N/A	GST	GSTU17,GSTU18,GSTU16,GSTU15,LOC103716739,LOC103698564,LOC103696108,GSTU7	35	CHE	705	complete	ISS_2	IPR004045,IPR004046,IPR036282,IPR010987,IPR036249,IPR040079	Glutathione S-transferase U17	Glutathione S-transferase family protein	LOC_Os10g38660.1	0.5	1	1	371.543	467.023	467.52	522.13	0.329964	0.331498	0.490879	0.464436	0.436334	0.569243	K00799|1|6e-82|301|vvi:100245065|glutathione S-transferase [EC:2.5.1.18]		-	GO:0016740//transferase activity;GO:0016829//lyase activity	-	COCehwD004346.1	CN01_U02P022000
CN01_01P015750	CN01_01G015750	#N/A	#N/A	EIN3,EIL1,EIL3,EIL5,LOC103707671,LOC103721270,EIL4	#N/A	CHE	1923	complete	ISS_1	IPR023278,IPR006957	protein ETHYLENE-INSENSITIVE 3-like 1a	Ethylene insensitive 3 family protein	LOC_Os03g20790.1	0.6	1	1	411.617	465.343	500.56	630.26	0.176994	0.282242	0.614646	0.309578	0.389946	0.640144	K14514|1|0.0|677|sbi:SORBI_01g036740|ethylene-insensitive protein 3		-	-	-	COCehwD013614.1	CN01_01P015750
CN01_02P004210	CN01_02G004210	#N/A	#N/A	infA,GAUT3,MA16_Dca025288,AXF42_Ash001174,LOC103719006,LOC103720555	#N/A	CHE	438	complete	ISS_1	IPR001253,IPR006196,IPR018104,IPR012340	Eukaryotic translation initiation factor 1A	Nucleic acid-binding, OB-fold-like protein	LOC_Os02g19770	0.88	0.99	0.99	874.487	463.667	768.48	1119.87	-0.915348	-0.186429	0.356817	0.770938	0.300838	0.47306	K03236|1|3e-53|204|rcu:RCOM_0510890|translation initiation factor 1A		-	GO:0008135//translation factor activity, nucleic acid binding	GO:0006412//translation	COCehwD006058.1	CN01_02P004210
CN01_scaffold017705P000010	CN01_scaffold017705G000010	#N/A	#N/A	ATPD,LOC103715263,LOC103717780,103969103,ACMD2_00144	#N/A	CHE	486	complete	ISS_2	IPR026015,IPR020781,IPR000711	ATP synthase delta chain, chloroplastic-like	ATP synthase delta-subunit gene	LOC_Os02g51470.3	0.57	0.99	0.65	453.667	463.283	498.97	423.55	0.0302621	0.13732	-0.0991004	0.105961	0.245618	0.199145	K02113|1|1e-58|223|pop:POPTR_574320|F-type H+-transporting ATPase subunit delta [EC:3.6.3.14]		GO:0009526//plastid envelope;GO:0009534//chloroplast thylakoid;GO:0009570//chloroplast stroma;GO:0033178//proton-transporting two-sector ATPase complex, catalytic domain	GO:0015078//hydrogen ion transmembrane transporter activity	GO:0006952//defense response;GO:0006818//hydrogen transport;GO:0009767//photosynthetic electron transport chain;GO:0006754//ATP biosynthetic process	COCehwD007552.1	CN01_U02P003600
CN01_08P003030	CN01_08G003030	#N/A	#N/A	GSVIVT00034021001,RAP40,RPSaB,179B,LOC103712591,LOC103703323,LOC103702376,103995841	#N/A	CHE	912	complete	ISS_1	IPR027498,IPR005707,IPR018130,IPR001865,IPR023591,IPR032281	40S ribosomal protein SA	40s ribosomal protein SA B	LOC_Os07g42450	0.84	0.9	0.89	360.367	463.26	264.687	316.165	0.362357	-0.44518	-0.188788	0.491688	0.529944	0.304453	K02998|1|2e-112|403|zma:100273082|small subunit ribosomal protein SAe		GO:0030529//ribonucleoprotein complex	GO:0005198//structural molecule activity	GO:0010467//gene expression	COCehwD014903.1	CN01_08P003030
CN01_08P001860	CN01_08G001860	#N/A	#N/A	CURT1A,CURT1D,CURT1B,CURT1C,LOC103715037,LOC103715336,LOC109012274,AXF42_Ash020872	#N/A	CHE	453	complete	ISS_2	IPR025564,IPR033344	Protein CURVATURE THYLAKOID 1A, chloroplastic	#N/A	LOC_Os06g15400.1	0.65	0.95	0.86	387.4	459.027	417.69	402.82	0.244754	0.108609	0.0563114	0.376064	0.211855	0.138225	-		-	-	-	COCehwD020436.1	CN01_08P001860
CN01_10P006950	CN01_10G006950	#N/A	#N/A	RPL21E,RPL21A,RPL21,TMN11,103984423,103982644,ACMD2_00410	#N/A	CHE	495	complete	ISS_1	IPR001147,IPR018259,IPR008991,IPR036948	60S ribosomal protein L21-1	Translation protein SH3-like family protein	LOC_Os03g04750.1	0.91	0.99	0.99	381.007	453.227	399.123	515.915	0.250417	0.0670184	0.437317	0.387086	0.153787	0.534314	K02889|1|2e-87|319|pop:POPTR_819333|large subunit ribosomal protein L21e		GO:0043231//intracellular membrane-bounded organelle;GO:0030529//ribonucleoprotein complex	GO:0005198//structural molecule activity	GO:0010467//gene expression	COCehwD027435.1	CN01_10P006950
CN01_01P022350	CN01_01G022350	#N/A	#N/A	RAP,APA1,Os05g0567100,APA2,LOC103714729,BAE44_0006562,LOC101785260	#N/A	CHE	1530	complete	ISS_1	IPR033121,IPR008139,IPR033869,IPR001969,IPR021109,IPR001461,IPR011001,IPR008138,IPR007856	aspartic proteinase	aspartic proteinase A1	LOC_Os05g49200.1	0.59	0.99	0.95	484.573	451.237	386.883	408.315	-0.102831	-0.324816	-0.247032	0.204741	0.426888	0.368815	K08245|1|0.0|719|bdi:100842338|phytepsin [EC:3.4.23.40]		-	-	-	COCehwD010077.1	CN01_01P022350
CN01_12P000480	CN01_12G000480	#N/A	#N/A	ACLA-3,ACLA-2,ACLA-1,LOC103698046,ACMD2_02473,103993707,LOC104607114	#N/A	CHE	1272	complete	ISS_1	IPR016102,IPR032263,IPR013650,IPR013815	ATP-citrate synthase alpha chain protein 3	ATP-citrate lyase A-3	LOC_Os12g37870.1	0.92	1	1	442.127	449.243	404.773	300.115	0.0230373	-0.127346	-0.558944	0.0900757	0.234111	0.611859	K01648|1|0.0|792|rcu:RCOM_1436330|ATP citrate (pro-S)-lyase [EC:2.3.3.8]		-	GO:0004774//succinate-CoA ligase activity;GO:0032559	-	COCehwD022750.1	CN01_12P000480
CN01_scaffold004312P000010	CN01_scaffold004312G000010	#N/A	#N/A	CHLP,PDS1,MIMGU_mgv1a027074mg,Chl,GSCOC_T00035761001,CDL15_Pgr008884	#N/A	CHE	1425	complete	ISS_1	IPR036188,IPR011774,IPR002938,IPR010253,IPR011777	geranylgeranyl diphosphate reductase, chloroplastic	Pyridine nucleotide-disulphide oxidoreductase family protein	LOC_Os02g51080.1	0.8	0.9	0.93	367.707	440.333	607.483	601.035	0.260041	0.724289	0.708894	0.396991	0.680911	0.686806	K10960|1|0.0|669|gmx:100814603|geranylgeranyl reductase [EC:1.3.1.83]		GO:0009536//plastid	GO:0016627//oxidoreductase activity, acting on the CH-CH group of donors;GO:0050662//coenzyme binding	GO:0042360//vitamin E metabolic process;GO:0006399//tRNA metabolic process;GO:0006779//porphyrin-containing compound biosynthetic process;GO:0008654//phospholipid biosynthetic process	COCehwD018014.1	CN01_U02P021150
CN01_scaffold006850P000060	CN01_scaffold006850G000060	#N/A	#N/A	FTSH1,FTSH,FTSH5,LOC103723060,LOC104587097,CUMW_117550,MANES_05G135500	#N/A	CHE	2172	complete	ISS_1	IPR003593,IPR005936,IPR037219,IPR003959,IPR027417,IPR000642,IPR003960,IPR041569	ATP-dependent zinc metalloprotease FTSH 1, chloroplastic	FtsH extracellular protease family	LOC_Os06g51029.1	0.92	0.87	0.92	351.43	439.923	441.907	416.88	0.324015	0.330504	0.246395	0.454966	0.436162	0.368388	K03798|1|0.0|1059|vvi:100250509|cell division protease FtsH [EC:3.4.24.-]		GO:0009941//chloroplast envelope;GO:0044436;GO:0031224//intrinsic to membrane;GO:0009534//chloroplast thylakoid	GO:0004175//endopeptidase activity;GO:0032559;GO:0043169//cation binding;GO:0042623//ATPase activity, coupled	GO:0044257//cellular protein catabolic process;GO:0009767//photosynthetic electron transport chain;GO:0009207;GO:0009765//photosynthesis, light harvesting	COCehwD023533.1	CN01_U02P013940
CN01_06P002170	CN01_06G002170	#N/A	#N/A	unknown_gene	#N/A	CHE	348	missing_functional_completeness	ISS_5	#N/A	hypothetical protein	#N/A	#N/A	#N/A	#N/A	#N/A	615.08	433.927	496.977	793.45	-0.503323	-0.307596	0.367365	0.596594	0.417753	0.480142	-		-	-	-	COCehwD016889.1	CN01_06P002170
CN01_07P008500	CN01_07G008500	#N/A	#N/A	RPL9,RPL9B,RPL9D,LOC103703525,ACMD2_15022	#N/A	CHE	570	complete	ISS_1	IPR036789,IPR020040,IPR002359,IPR000702	60S ribosomal protein L9	Ribosomal protein L6 family	LOC_Os09g31180.1	0.87	0.99	0.99	363.94	429.16	303.667	317.41	0.237815	-0.261212	-0.197353	0.375774	0.369979	0.31529	K02940|1|3e-85|311|osa:4347422|large subunit ribosomal protein L9e		GO:0030529//ribonucleoprotein complex	GO:0003723//RNA binding;GO:0005198//structural molecule activity	GO:0010467//gene expression	COCehwD010655.1	CN01_07P008500
CN01_scaffold008687P000010	CN01_scaffold008687G000010	#N/A	#N/A	CLA1,TKT2,DXS,Os07g0190000,ZEAMMB73_Zm00001d038170,dxs,CLA1_11,LOC103710963	#N/A	CHE	1803	complete	ISS_2	IPR029061,IPR009014,IPR005477,IPR005474,IPR020826,IPR005475,IPR033248	Deoxy xylulose synthase 1	Deoxyxylulose-5-phosphate synthase	LOC_Os05g33840.1	0.82	0.85	0.74	360.053	428.993	524.68	450.49	0.252745	0.543227	0.323284	0.386928	0.5911	0.435096	K01662|1|0.0|842|vvi:100249323|1-deoxy-D-xylulose-5-phosphate synthase [EC:2.2.1.7]		GO:0009536//plastid	GO:0016903//oxidoreductase activity, acting on the aldehyde or oxo group of donors;GO:0016744	GO:0006772//thiamine metabolic process;GO:0006721//terpenoid metabolic process	COCehwD026547.1	CN01_U02P016740
CN01_scaffold017140P000040	CN01_scaffold017140G000040	#N/A	#N/A	PTAC12,POT7,TBL9,CQW23_33729,AXF42_Ash013203,GLYMA_13G020100,CQW23_34295	#N/A	CHE	225	complete	ISS_4	#N/A	conserved hypothetical protein	plastid transcriptionally active 12	LOC_Os01g56350.3	0.31	0.68	0.09	483.003	423.777	590.653	793.06	-0.188729	0.290278	0.715397	0.321676	0.399371	0.690926	-		-	-	-	COCehwD007221.1	CN01_U03P009400
CN01_06P005390	CN01_06G005390	#N/A	#N/A	PRXIIC,PRXIIB,PRXIID,TPX,LOC103706844,SORBI_3003G254300	#N/A	CHE	489	complete	ISS_1	IPR013740,IPR037944,IPR036249,IPR013766	peroxiredoxin-2C	thioredoxin-dependent peroxidase 2	LOC_Os01g48420.1	0.78	0.99	0.99	381.277	423.197	246.867	221.235	0.15049	-0.627106	-0.785259	0.269634	0.637736	0.71334	K03386|1|6e-68|254|ath:AT1G60740|peroxiredoxin (alkyl hydroperoxide reductase subunit C) [EC:1.11.1.15];K11187|2|8e-38|154|cre:CHLREDRAFT_196639|peroxiredoxin 5, atypical 2-Cys peroxiredoxin [EC:1.11.1.15]		GO:0016020//membrane;GO:0009536//plastid	GO:0016209//antioxidant activity;GO:0016705//oxidoreductase activity, acting on paired donors, with incorporation or reduction of molecular oxygen	GO:0008152//metabolic process;GO:0019725//cellular homeostasis;GO:0010038//response to metal ion	COCehwD010366.1	CN01_06P005390
CN01_13P001900	CN01_13G001900	#N/A	#N/A	UBP1B,UBP1C,UBP1,UBP1A,LOC103702254	#N/A	CHE	1212	complete	ISS_1	IPR000504,IPR012677,IPR003954,IPR035979	oligouridylate-binding protein 1B	RNA-binding (RRM/RBD/RNP motifs) family protein	LOC_Os07g42380	0.78	0.94	0.89	697.273	422.093	659.453	679.625	-0.724162	-0.0804537	-0.0369854	0.707652	0.173031	0.113538	K13201|1|0.0|636|gmx:100781227|nucleolysin TIA-1/TIAR		-	GO:0005488//binding	-	COCehwD023619.1	CN01_13P001900
CN01_06P010400	CN01_06G010400	#N/A	#N/A	petC,petC1,VIT_19s0014g03850,VIT_03s0017g00940	#N/A	CHE	534	complete	ISS_2	IPR005805,IPR014909,IPR036922,IPR017941,IPR014349,IPR023960	Cytochrome b6-f complex iron-sulfur subunit	photosynthetic electron transfer C	LOC_Os07g37030	0.76	0.99	0.73	514.183	419.397	979.233	818.97	-0.293967	0.92937	0.671528	0.427217	0.754588	0.671423	K02636|1|3e-67|251|vvi:100258879|cytochrome b6-f complex iron-sulfur subunit [EC:1.10.9.1]		GO:0034357;GO:0009536//plastid	GO:0016679//oxidoreductase activity, acting on diphenols and related substances as donors;GO:0051536//iron-sulfur cluster binding	GO:0008152//metabolic process	COCehwD017955.1	CN01_06P010400
CN01_scaffold002189P000010	CN01_scaffold002189G000010	ABA	PMP3,LTI	LTI6B,LTI6A,RCI2B,CICLE_v10013304mg,CISIN_1g035460mg,LOC109018737,LOC103696736	23	CHE	174	complete	ISS_1	IPR000612	hydrophobic protein RCI2B-like	Low temperature and salt responsive protein family	LOC_Os05g04700.1	0.89	0.91	0.57	483.223	417.327	378.323	383.15	-0.211513	-0.35307	-0.334781	0.343769	0.454322	0.444514	-		GO:0031410//cytoplasmic vesicle	-	-	COCehwD010011.1	CN01_U01P012870
CN01_scaffold004063P000090	CN01_scaffold004063G000090	#N/A	#N/A	RPL5,RPL5B,RPL5A,ACMD2_00733,LOC103708588,CDL15_Pgr027547,PanWU01x14_249890	#N/A	CHE	738	complete	ISS_2	IPR005485,IPR025607	60S ribosomal protein L5	ribosomal protein L5	LOC_Os01g67134.1	0.64	0.94	0.95	452.86	414.583	284.283	379.28	-0.127403	-0.671736	-0.255802	0.245079	0.659531	0.3784	K02932|1|2e-94|343|pop:POPTR_827713|large subunit ribosomal protein L5e		-	-	-	COCehwD017263.3	CN01_U01P013950
CN01_09P004370	CN01_09G004370	ROS	APX	APX4,APX3,LOC103720470,APX4-2,103992108	31	CHE	804	complete	ISS_2	IPR010255,IPR002016,IPR002207,IPR019794,IPR019793	L-ascorbate peroxidase 3	ascorbate peroxidase 3	LOC_Os08g43560	0.77	1	1	417.227	409.19	679.817	822.115	-0.0280605	0.704314	0.978509	0.105878	0.673444	0.773571	K00434|1|8e-111|397|osa:4346247|L-ascorbate peroxidase [EC:1.11.1.11]		-	GO:0004601//peroxidase activity	-	COCehwD026688.1	CN01_09P004370
CN01_03P015110	CN01_03G015110	#N/A	ZF,RING-C2H2	IDD7,IDD2,IDD1,MGP,LOC103702025,LOC103709567,LOC103711158,LOC103719621	#N/A	CHE	1512	complete	ISS_1	IPR013087,IPR036236	protein indeterminate-domain 7	indeterminate(ID)-domain 2	LOC_Os02g31890.1	0.43	0.93	0.89	499.11	406.443	440.25	647.12	-0.296304	-0.181035	0.374675	0.436852	0.289117	0.479725	-		-	-	-	COCehwD015415.1	CN01_03P015110
CN01_scaffold008631P000010	CN01_scaffold008631G000010	#N/A	#N/A	Smt1-1,SMT1,ARI5,ZSS1,LOC103697536,ACMD2_24600,COLO4_28253	#N/A	CHE	174	fragment	ISS_3	#N/A	putative Cycloartenol-C-24-methyltransferase 1	sterol methyltransferase 1	LOC_Os07g10600	0.4	0.89	0.15	624.277	405.723	434.883	623.31	-0.621689	-0.521557	-0.00223568	0.665377	0.580655	0.0543492	K00559|1|1e-08|55.8|pop:POPTR_1087868|sterol 24-C-methyltransferase [EC:2.1.1.41]		-	-	GO:0008152//metabolic process	COCehwD026483.1	CN01_U02P024300
CN01_11P001830	CN01_11G001830	#N/A	#N/A	CP31A,CP31B,LOC103712353,LOC104593034,LOC103719833,BVC80_1065g109	#N/A	CHE	1005	complete	ISS_2	IPR000504,IPR035979,IPR012677	31 kDa ribonucleoprotein, chloroplastic	31-kDa RNA binding protein	LOC_Os09g39180.1	0.86	0.55	0.58	391.67	400.703	288.327	269.555	0.0328959	-0.441934	-0.539059	0.105926	0.523649	0.59928	K11294|1|5e-36|149|smo:SELMODRAFT_15428|nucleolin;K14411|4|3e-22|103|vcn:VOLCADRAFT_107445|RNA-binding protein Musashi		GO:0032991//macromolecular complex;GO:0043231//intracellular membrane-bounded organelle	GO:0005488//binding	-	COCehwD017835.1	CN01_11P001830
CN01_scaffold085923P000020	CN01_scaffold085923G000020	#N/A	#N/A	PSY,Y1,LOC103723585	#N/A	CHE	258	complete	ISS_2	IPR008949	Y1	PHYTOENE SYNTHASE	LOC_Os06g51290	0.83	0.98	0.2	550.493	396.367	614.893	594.465	-0.473889	0.159611	0.110867	0.576315	0.267537	0.211295	K02291|1|9e-35|142|osa:4342137|phytoene synthase [EC:2.5.1.32]		-	GO:0016740//transferase activity	GO:0008152//metabolic process	COCehwD026450.1	CN01_U03P015240
CN01_13P004980	CN01_13G004980	#N/A	#N/A	RBG7,GRP,LOC103704248,OsGRP1,LOC103707612	#N/A	CHE	498	missing_functional_completeness	ISS_4	IPR000504,IPR035979,IPR012677	conserved hypothetical protein	cold, circadian rhythm, and rna binding 2	LOC_Os12g43600	0.87	0.53	0.54	391.69	395.67	233.333	330.285	0.0145854	-0.74732	-0.246001	0.0775014	0.691226	0.368252	K13195|1|9e-35|144|pop:POPTR_712972|cold-inducible RNA-binding protein;K02965|2|3e-14|75.9|ath:AT5G47320|small subunit ribosomal protein S19;K11294|3|3e-13|72.4|smo:SELMODRAFT_15428|nucleolin;K14411|5|7e-13|71.2|cme:CMR392C|RNA-binding protein Musashi		-	-	-	COCehwD005096.1	CN01_13P004980
CN01_10P002200	CN01_10G002200	#N/A	#N/A	4CL2,4CL3,4CL1,LOC103717120,4Cl4,LOC104600350	#N/A	CHE	1479	complete	ISS_2	IPR000873,IPR042099,IPR020845	4-coumarate--CoA ligase 2	4-coumarate:CoA ligase 3	LOC_Os02g46970	0.71	0.99	0.88	385.41	394.497	594.11	245.355	0.0336191	0.624336	-0.651523	0.105933	0.635302	0.656998	K01904|1|0.0|677|rcu:RCOM_1325310|4-coumarate--CoA ligase [EC:6.2.1.12]		-	GO:0016703;GO:0016405//CoA-ligase activity	GO:0008152//metabolic process	COCehwD010430.1	CN01_10P002200
CN01_14P007630	CN01_14G007630	#N/A	#N/A	LOC103709199,LOC103723317,ACMD2_08423,ACMD2_21712	#N/A	CHE	924	complete	ISS_1	IPR013989	B2 protein	DCD (Development and Cell Death) domain protein	LOC_Os05g41930.2	0.73	1	1	456.897	394.117	491.63	584.095	-0.213245	0.105705	0.354335	0.34368	0.212013	0.463913	-		-	-	-	COCehwD021331.1	CN01_14P007630
CN01_01P009620	CN01_01G009620	#N/A	#N/A	FTRC,LOC103713070,103999260,LOC104607964,Vigan.11G023800	#N/A	CHE	468	complete	ISS_1	IPR036644,IPR004209,IPR024707	ferredoxin-thioredoxin reductase catalytic chain, chloroplastic	ferredoxin thioredoxin reductase catalytic beta chain family protein	LOC_Os09g07570.1	0.83	0.69	0.73	444.547	390.27	430.13	397.85	-0.187862	-0.0475621	-0.16011	0.321469	0.12665	0.269869	-		GO:0009536//plastid	GO:0016731;GO:0051536//iron-sulfur cluster binding;GO:0043169//cation binding	GO:0008152//metabolic process	COCehwD010152.1	CN01_01P009620
CN01_03P001590	CN01_03G001590	#N/A	#N/A	Os03g0743400,H2AV,At2g38810,Os03g0162200,LOC103695640,ACMD2_20408,103975267,103996154	#N/A	CHE	405	complete	ISS_1	IPR032454,IPR009072,IPR032458,IPR007125,IPR002119	Histone H2A	histone H2A 11	LOC_Os03g53190	0.93	0.99	0.99	413.877	389.65	213.71	226.315	-0.0870221	-0.953546	-0.870869	0.191739	0.756264	0.73786	K11251|1|9e-54|206|gmx:100306322|histone H2A		GO:0000785//chromatin;GO:0043231//intracellular membrane-bounded organelle	GO:0003676//nucleic acid binding	GO:0034728//nucleosome organization	COCehwD003851.1	CN01_03P001590
CN01_03P008380	CN01_03G008380	#N/A	#N/A	RPL26A,RPL26B,RPL26,LOC103713997,LOC103701866,LOC104612302	#N/A	CHE	456	complete	ISS_1	IPR014722,IPR041988,IPR005824,IPR005825,IPR005756,IPR008991	60S ribosomal protein L26-2	Translation protein SH3-like family protein	LOC_Os12g05430	0.86	0.99	0.99	435.3	388.117	245.2	261.33	-0.16552	-0.828051	-0.736137	0.297914	0.71857	0.697226	K02898|1|3e-50|195|vvi:100267018|large subunit ribosomal protein L26e		GO:0043231//intracellular membrane-bounded organelle;GO:0030529//ribonucleoprotein complex	GO:0005198//structural molecule activity	GO:0010467//gene expression	COCehwD003448.1	CN01_03P008380
CN01_09P004470	CN01_09G004470	#N/A	#N/A	SKP1B,SKP1A,ASK4,ASK3,LOC103719237	#N/A	CHE	522	complete	ISS_1	IPR011333,IPR036296,IPR016897,IPR016072,IPR001232,IPR016073	SKP1-like protein 1	E3 ubiquitin ligase SCF complex subunit SKP1/ASK1 family protein	LOC_Os11g26910.1	0.71	0.98	0.96	491.207	386.827	303.593	275.83	-0.344643	-0.69419	-0.832551	0.474796	0.668818	0.727774	K03094|1|2e-48|189|rcu:RCOM_0362150|S-phase kinase-associated protein 1		-	-	-	COCehwD026678.1	CN01_09P004470
CN01_10P002480	CN01_10G002480	#N/A	#N/A	SNL6,TKPR1,CCR1,CCR2,LOC103704711,LOC103711762,ACMD2_14435,BRADI_3g34280v3	#N/A	CHE	549	fragment	ISS_3	IPR036291	putative Tetraketide alpha-pyrone reductase 1	NAD(P)-binding Rossmann-fold superfamily protein	LOC_Os10g42620.1	0.63	0.99	0.59	462.32	381.407	502.883	268.91	-0.277562	0.121332	-0.781768	0.416698	0.223321	0.711598	K09753|1|6e-28|121|sbi:SORBI_07g021680|cinnamoyl-CoA reductase [EC:1.2.1.44]		-	GO:0048037//cofactor binding;GO:0033764//steroid dehydrogenase activity, acting on the CH-OH group of donors, NAD or NADP as acceptor	GO:0008202//steroid metabolic process	COCehwD010402.1	CN01_10P002480
CN01_16P004970	CN01_16G004970	#N/A	#N/A	UBI3,RPS27AA,LOC103709637,LOC103721584,VIT_07s0005g02160,VITISV_027093	#N/A	CHE	471	complete	ISS_1	IPR038582,IPR000626,IPR019954,IPR002906,IPR011332,IPR029071,IPR019956	Ubiquitin-40S ribosomal protein S27a	Ribosomal protein S27a / Ubiquitin family protein	LOC_Os05g06770.1	0.95	0.97	0.99	534.28	381.19	477.883	419.63	-0.487086	-0.160938	-0.348478	0.590317	0.267385	0.463798	K02977|1|5e-69|257|vvi:100258943|small subunit ribosomal protein S27Ae		GO:0030529//ribonucleoprotein complex	GO:0005198//structural molecule activity	GO:0010467//gene expression	COCehwD002746.1	CN01_16P004970
CN01_10P001900	CN01_10G001900	#N/A	#N/A	PIP2-6,PIP2-7,PIP2-8,LOC103721145,LOC103719589,4335226	#N/A	CHE	849	complete	ISS_2	IPR023271,IPR000425,IPR034294,IPR022357	Aquaporin PIP2-7	plasma membrane intrinsic protein 2	LOC_Os07g26630.1	0.76	0.99	0.99	493.097	381.07	566.167	437.995	-0.371814	0.199356	-0.170956	0.499669	0.310636	0.281373	K09872|1|2e-133|473|osa:4335226|aquaporin PIP		GO:0031225//anchored to membrane;GO:0043231//intracellular membrane-bounded organelle	GO:0005372//water transmembrane transporter activity	GO:0009725//response to hormone stimulus;GO:0006810//transport	COCehwD010460.1	CN01_10P001900
CN01_04P008090	CN01_04G008090	#N/A	#N/A	AGT1,clpP,LOC103723389,ACMD2_23939,agt1	#N/A	CHE	441	fragment	ISS_3	IPR015424,IPR015421,IPR000192	putative Serine--glyoxylate aminotransferase	alanine:glyoxylate aminotransferase	LOC_Os08g39300	0.79	0.95	0.5	422.587	380.39	788.837	797.71	-0.151768	0.900479	0.916617	0.269641	0.739758	0.754996	K00830|1|3e-67|251|mtr:MTR_3g053890|alanine-glyoxylate transaminase / serine-glyoxylate transaminase / serine-pyruvate transaminase [EC:2.6.1.44 2.6.1.45 2.6.1.51]		-	GO:0048037//cofactor binding;GO:0008483//transaminase activity	-	COCehwD012990.1	CN01_04P008090
CN01_scaffold011959P000040	CN01_scaffold011959G000040	#N/A	#N/A	DI19-1,DI19-3,DI19-4,LOC103713198,LOC104599464,LOC104608158	#N/A	CHE	588	complete	ISS_2	IPR027935,IPR008598,IPR033347	Protein DEHYDRATION-INDUCED 19	Drought-responsive family protein	LOC_Os05g48800	0.66	0.98	0.85	644.187	378.86	912.083	1243.5	-0.765814	0.501687	0.948856	0.725517	0.567975	0.765665	-		GO:0043231//intracellular membrane-bounded organelle	-	-	COCehwD003034.1	CN01_U02P017710
CN01_14P011580	CN01_14G011580	#N/A	#N/A	ELIP1,ELIP2,LOC103704509,LOC103697096,ELIPa	#N/A	CHE	573	complete	ISS_1	IPR022796	early light-induced protein 1, chloroplastic	Chlorophyll A-B binding family protein	LOC_Os07g08160.1	0.59	0.84	0.82	664.993	375.363	532.51	397.705	-0.825052	-0.320531	-0.741641	0.743906	0.427543	0.698863	-		-	-	GO:0006950//response to stress;GO:0009628//response to abiotic stimulus	COCehwD025347.1	CN01_14P011580
CN01_scaffold017361P000010	CN01_scaffold017361G000010	#N/A	#N/A	HSP70,HSC-2,MED37C,MED37E,LOC103716513,LOC104594564	#N/A	CHE	1947	complete	ISS_1	IPR029047,IPR013126,IPR018181,IPR029048	Heat shock cognate 70 kDa protein	heat shock cognate protein 70-1	LOC_Os11g47760.1	0.96	1	1	513.36	365.957	432.08	343.59	-0.488298	-0.248672	-0.579283	0.590186	0.361457	0.62427	K03283|1|0.0|1130|osa:4351208|heat shock 70kDa protein 1/8		-	GO:0016628//oxidoreductase activity, acting on the CH-CH group of donors, NAD or NADP as acceptor;GO:0032559	GO:0008152//metabolic process;GO:0050896//response to stimulus	COCehwD007348.1	CN01_U03P011000
CN01_10P001200	CN01_10G001200	#N/A	#N/A	PAL1,LIP1P-2,LIP1P-1,TorRG33x02_317210,PanWU01x14_027460,A4U43_UnF11730	#N/A	CHE	798	modules	ISS_4	#N/A	conserved hypothetical protein	GLN phosphoribosyl pyrophosphate amidotransferase 1	LOC_Os05g35580	0.37	0.31	0.13	670.033	365.007	1414.55	935.695	-0.87631	1.07804	0.481805	0.759881	0.795667	0.563016	-		-	-	-	COCehwD010530.2	CN01_10P001200
CN01_scaffold012795P000050	CN01_scaffold012795G000050	#N/A	#N/A	GUN4,At1g06620,At5g02830,ZFP8,LOC103714532,POPTR_0007s02000g,103996756,POPTR_2108s00210g	#N/A	CHE	765	complete	ISS_1	IPR008629,IPR037215	tetrapyrrole-binding protein, chloroplastic	enzyme binding,tetrapyrrole binding	LOC_Os11g16550	0.55	1	1	594.777	359.64	594.34	620.285	-0.725795	-0.00105957	0.0605832	0.711163	0.0638109	0.138465	-		GO:0043231//intracellular membrane-bounded organelle	-	-	COCehwD003811.1	CN01_U02P005850
CN01_scaffold008389P000010	CN01_scaffold008389G000010	#N/A	#N/A	HOX20,HOX4,LOC103718729,LOC103707964	#N/A	CHE	810	complete	ISS_1	IPR000047,IPR017970,IPR001356,IPR003106,IPR009057	homeobox-leucine zipper protein HOX20	homeobox protein 16	LOC_Os09g29460.1	0.56	0.87	0.83	368.563	357.817	692.38	646.26	-0.042692	0.909652	0.810202	0.119701	0.743846	0.723102	K09338|1|1e-31|135|aly:ARALYDRAFT_490793|homeobox-leucine zipper protein		-	-	-	COCehwD026202.1	CN01_U01P014950
CN01_06P012120	CN01_06G012120	#N/A	#N/A	ATPC1,ATPC,LOC103697175,LOC103717622,TCM_030229,LOC104610940	#N/A	CHE	1128	complete	ISS_1	IPR023632,IPR000131,IPR035968	ATP synthase gamma chain 1, chloroplastic	ATPase, F1 complex, gamma subunit protein	LOC_Os07g32880	0.73	1	1	414.607	352.677	638.987	664.24	-0.233397	0.624043	0.679961	0.365269	0.635537	0.67524	K02115|1|2e-152|536|vvi:100264091|F-type H+-transporting ATPase subunit gamma [EC:3.6.3.14]		GO:0009526//plastid envelope;GO:0009535//chloroplast thylakoid membrane;GO:0033178//proton-transporting two-sector ATPase complex, catalytic domain	GO:0015078//hydrogen ion transmembrane transporter activity;GO:0019829//cation-transporting ATPase activity;GO:0032559	GO:0006818//hydrogen transport;GO:0009767//photosynthetic electron transport chain;GO:0019222//regulation of metabolic process;GO:0006754//ATP biosynthetic process	COCehwD021903.1	CN01_06P012120
CN01_09P002190	CN01_09G002190	#N/A	#N/A	TKL-2,TKL-1,LOC103723776,LOC103717394,MA16_Dca016199,AXF42_Ash018986	#N/A	CHE	2241	complete	ISS_1	IPR029061,IPR009014,IPR033248,IPR005478,IPR005474,IPR033247,IPR005475	transketolase, chloroplastic	Transketolase	LOC_Os06g04270.1	0.85	0.96	0.96	422.72	346.73	507.51	485.43	-0.28589	0.263734	0.199561	0.426534	0.370882	0.315947	K00615|1|0.0|1236|rcu:RCOM_1611360|transketolase [EC:2.2.1.1]		-	-	-	COCehwD022057.1	CN01_09P002190
CN01_14P007370	CN01_14G007370	#N/A	#N/A	UBQ4,UBQ10,PU1,PCUBI4-2,SORBI_3010G239500,RchiOBHm_Chr5g0037651,POPTR_011G134200v3	#N/A	CHE	918	complete	ISS_1	IPR000626,IPR019954,IPR029071,IPR019956	UBQ10	polyubiquitin 10	LOC_Os02g06640.3	1	1	0.8	403.277	324.847	333.167	270.415	-0.312011	-0.275526	-0.576595	0.445274	0.38916	0.623175	K08770|1|1e-168|590|mtr:MTR_8g018230|ubiquitin C		GO:0043231//intracellular membrane-bounded organelle	-	GO:0032502//developmental process;GO:0019941//modification-dependent protein catabolic process;GO:0010033//response to organic substance;GO:0016567//protein ubiquitination	COCehwD018757.1	CN01_14P007370
CN01_15P001480	CN01_15G001480	#N/A	#N/A	SDC1,SDC,Os10g0105700,LOC_Os04g04640,LOC103701195,HDC,ACMD2_03494	#N/A	CHE	1401	complete	ISS_1	IPR002129,IPR015422,IPR015424,IPR021115,IPR015421	serine decarboxylase 1	Pyridoxal phosphate (PLP)-dependent transferases superfamily protein	LOC_Os02g33710	0.84	0.95	0.92	364.047	322.023	209.2	331.9	-0.176958	-0.799241	-0.133375	0.30895	0.707442	0.234543	K01590|1|0.0|797|sbi:SORBI_04g022140|histidine decarboxylase [EC:4.1.1.22]		-	GO:0016831//carboxy-lyase activity;GO:0048037//cofactor binding	GO:0003006//developmental process involved in reproduction;GO:0019752//carboxylic acid metabolic process	COCehwD009347.1	CN01_15P001480
CN01_15P005450	CN01_15G005450	#N/A	NAC,TF	NAC083,NAC041,NAC056,NAC010,LOC103708093,LOC103697816,104000669	#N/A	CHE	738	complete	ISS_1	IPR036093,IPR003441	NAC domain-containing protein 83	NAC domain containing protein 47	LOC_Os11g03300.1	0.44	0.85	0.56	372.27	321.887	375.94	327.855	-0.209797	0.0141531	-0.183291	0.343087	0.0813166	0.292355	-		-	GO:0005488//binding;GO:0001071//nucleic acid binding transcription factor activity	GO:0010087//phloem or xylem histogenesis;GO:0032501//multicellular organismal process	COCehwD004856.1	CN01_15P005450
CN01_scaffold003920P000020	CN01_scaffold003920G000020	#N/A	#N/A	ABCC2,LOC103720587,LOC103705051,LOC103706271,BVC80_881g39	#N/A	CHE	936	complete	ISS_2	IPR001374,IPR024771,IPR036867	cAMP-regulated phosphoprotein 21	Single-stranded nucleic acid binding R3H protein	LOC_Os05g34070	0.49	0.98	0.86	585.14	321.597	446.537	717.655	-0.863529	-0.390003	0.294509	0.752597	0.486128	0.408417	K14771|1|1e-08|58.5|vcn:VOLCADRAFT_116880|U3 small nucleolar RNA-associated protein 19		-	-	-	COCehwD016855.2	CN01_U01P006430
CN01_contig69414919P000010	CN01_contig69414919G000010	#N/A	#N/A	At3g61260,DBP,REM4.1,LOC103710553,103970356,100304007,SORBI_3006G159300	#N/A	CHE	294	fragment	ISS_3	IPR005516	putative Remorin	Remorin family protein	LOC_Os04g45070.1	0.77	0.97	0.46	424.107	319.54	370.377	439.645	-0.408431	-0.195434	0.0519119	0.531529	0.310077	0.126001	-		-	-	-	COCehwD000485.1	CN01_U03P018950
CN01_13P002710	CN01_13G002710	#N/A	#N/A	LOC103715228,ACMD2_00150,MA16_Dca004309	#N/A	CHE	546	complete	ISS_2	#N/A	pheromone-processing carboxypeptidase KEX1	#N/A	#N/A	#N/A	#N/A	#N/A	356.653	318.347	276.977	366.37	-0.163924	-0.364758	0.0387789	0.284754	0.461403	0.113235	-		-	-	-	COCehwD021186.1	CN01_13P002710
CN01_03P012740	CN01_03G012740	#N/A	#N/A	UBC10,UBC9,UBC28,POPTR_012G033000v3,PRUPE_2G306300,LOC103484148,FSB_LOCUS3942	#N/A	CHE	447	complete	ISS_1	IPR023313,IPR000608,IPR016135	Ubiquitin-conjugating enzyme E2 10	ubiquitin-conjugating enzyme 11	LOC_Os01g60410	0.96	0.99	0.99	553.633	315.287	591.813	695.33	-0.812267	0.0962114	0.328767	0.737153	0.20094	0.44515	K06689|1|1e-85|312|pop:POPTR_586577|ubiquitin-conjugating enzyme E2 D/E [EC:6.3.2.19]		-	GO:0016879//ligase activity, forming carbon-nitrogen bonds;GO:0032559	GO:0006464//cellular protein modification process	COCehwD016034.1	CN01_03P012740
CN01_01P018320	CN01_01G018320	#N/A	#N/A	TSS,FMT,KLCR3,KLCR1,LOC103715898,ACMD2_12016,BAE44_0012197	#N/A	CHE	4596	complete	ISS_2	IPR011990,IPR019734,IPR013026,IPR025697	Protein TSS	Tetratricopeptide repeat (TPR)-like superfamily protein	LOC_Os04g55230	0.53	0.6	0.49	351.66	314.643	571.52	637.31	-0.160464	0.700623	0.857814	0.284685	0.672886	0.737203	K03255|1|7e-53|208|ppp:PHYPADRAFT_203627|protein TIF31		-	-	-	COCehwD025182.1	CN01_01P018320
CN01_scaffold038925P000010	CN01_scaffold038925G000010	#N/A	#N/A	unknown_gene	#N/A	CHE	339	missing_functional_completeness	ISS_5	#N/A	hypothetical protein	#N/A	LOC_Os05g07220.2	0.25	0.88	0.09	470.63	299.95	258.593	287.61	-0.649871	-0.863908	-0.710479	0.677241	0.727175	0.685826	-		-	-	-	COCehwD016810.1	CN01_U03P012950
CN01_scaffold107212P000010	CN01_scaffold107212G000010	#N/A	#N/A	JMJ706,PCMP-E68,PCMP-E105,At3g26840,MICPUCDRAFT_23907,MA16_Dca002212,AXF42_Ash009236,AXF42_Ash013356	#N/A	CHE	168	complete	ISS_4	#N/A	conserved hypothetical protein	autophagy 2	LOC_Os06g15700.1	0.28	0.95	0.03	444.41	299.813	425.747	592.375	-0.567827	-0.061896	0.414619	0.637021	0.138074	0.51263	-		-	-	-	COCehwD001803.1	COCehwD001803.1
CN01_04P006030	CN01_04G006030	#N/A	#N/A	ZIFL1,ZIFL2,ZIF1,GUX5,LOC103712255,LOC103712253,LOC103697307	#N/A	CHE	189	fragment	ISS_3	#N/A	putative Protein ZINC INDUCED FACILITATOR-LIKE 1	zinc induced facilitator-like 1	LOC_Os11g04030	0.72	0.97	0.22	391.477	295.61	488.14	641.69	-0.405231	0.318369	0.71295	0.531101	0.426861	0.687098	-		GO:0044464//cell part	-	GO:0006810//transport	COCehwD006265.1	CN01_04P006030
CN01_09P005890	CN01_09G005890	#N/A	#N/A	RHN1,RAB5,RABF2A,RABF2B,LOC103717597,LOC103723680,11417941	#N/A	CHE	435	complete	ISS_2	IPR005225,IPR027417,IPR001806	Small GTPase family RAB protein	Ras-related small GTP-binding family protein	LOC_Os03g46390	0.8	0.93	0.66	454.597	293.773	636.12	725.045	-0.629884	0.484712	0.673483	0.668019	0.551221	0.67112	K07976|1|3e-62|234|aly:ARALYDRAFT_494466|Rab family, other;K07887|5|9e-56|213|osa:4333662|Ras-related protein Rab-5A		GO:0016020//membrane	GO:0032561//guanyl ribonucleotide binding	GO:0006810//transport;GO:0035556//intracellular signal transduction	COCehwD008539.1	CN01_09P005890
CN01_scaffold004553P000010	CN01_scaffold004553G000010	#N/A	#N/A	CBSX3,CBSCBSPB2,CBSCBSPB3,CBSCBSPB1,LOC103720709,ACMD2_09528,A4U43_UnF10120,LOC104593392	#N/A	CHE	834	modules	ISS_3	IPR000644	putative CBS domain-containing protein CBSX3, mitochondrial	Cystathionine beta-synthase (CBS) family protein	LOC_Os01g44360	0.48	0.77	0.82	535.653	290.437	577.33	1017.5	-0.883076	0.108097	0.925664	0.759226	0.212165	0.760732	-		-	GO:0046914//transition metal ion binding	GO:0006970//response to osmotic stress	COCehwD018792.1	CN01_U02P021930
CN01_08P003050	CN01_08G003050	#N/A	#N/A	EREBP1,RAP2-12,RAP2-2,RAP2-3,LOC103703325,LOC103712588,ACMD2_26860	#N/A	CHE	1158	complete	ISS_1	IPR036955,IPR016177,IPR001471	ethylene-responsive transcription factor 1	related to AP2 12	LOC_Os02g54160	0.48	0.98	0.99	397.997	285.127	219.813	232.195	-0.481153	-0.856477	-0.777419	0.581074	0.72641	0.710795	K09286|1|1e-84|311|rcu:RCOM_0043760|EREBP-like factor		-	-	-	COCehwD014905.1	CN01_08P003050
CN01_05P006270	CN01_05G006270	#N/A	#N/A	CAP10A,CAP10B,LHCA5,LOC103707885,LOC103721060,100500118,GLYMA_15G052400	#N/A	CHE	774	complete	ISS_1	IPR022796,IPR001344,IPR023329	chlorophyll a-b binding protein CP24 10A, chloroplastic-like	light harvesting complex photosystem II subunit 6	LOC_Os04g38410	0.78	0.95	0.94	427.823	281.84	544.413	420.19	-0.602139	0.347687	-0.0259733	0.65343	0.454598	0.100073	K08917|1|9e-128|454|vvi:100241887|light-harvesting complex II chlorophyll a/b binding protein 6		GO:0009521;GO:0031224//intrinsic to membrane;GO:0009534//chloroplast thylakoid	GO:0046906//tetrapyrrole binding	GO:0006464//cellular protein modification process;GO:0006091//generation of precursor metabolites and energy	COCehwD014981.1	CN01_05P006270
CN01_06P010940	CN01_06G010940	#N/A	#N/A	unknown_gene	#N/A	CHE	192	missing_functional_completeness	ISS_5	#N/A	hypothetical protein	TTF-type zinc finger protein with HAT dimerisation domain	LOC_Os04g15910.1	0.33	0.92	0.08	467.267	281.013	329.893	442.47	-0.733608	-0.502247	-0.0786665	0.710349	0.566265	0.174687	-		-	-	-	COCehwD014689.1	CN01_06P010940
CN01_07P012260	CN01_07G012260	#N/A	#N/A	MSBP2,MSBP1,LOC103712112,LOC103696495,103970360	#N/A	CHE	825	complete	ISS_1	IPR036400,IPR001199	membrane steroid-binding protein 1	membrane-associated progesterone binding protein 3	LOC_Os02g42740.1	0.63	0.8	0.41	417.357	278.633	334.523	335.71	-0.582913	-0.319174	-0.314065	0.643484	0.426405	0.425605	-		-	-	-	COCehwD023420.1	CN01_07P012260
CN01_scaffold007735P000020	CN01_scaffold007735G000020	#N/A	#N/A	CAB21,CAB91R,CAB7,CAB50,LOC103714976,LOC103703341,LOC104587699,JCGZ_04588	#N/A	CHE	795	complete	ISS_1	IPR001344,IPR023329,IPR022796	Chlorophyll a-b binding protein 21, chloroplastic	photosystem II light harvesting complex gene B1B2	LOC_Os01g41710	0.89	0.99	0.99	362.547	278.267	334.727	274.765	-0.381699	-0.115183	-0.399968	0.506898	0.222852	0.502524	K08912|1|6e-146|514|rcu:RCOM_0633890|light-harvesting complex II chlorophyll a/b binding protein 1		GO:0009521;GO:0031224//intrinsic to membrane;GO:0009534//chloroplast thylakoid	GO:0046906//tetrapyrrole binding;GO:0043169//cation binding	GO:0006464//cellular protein modification process;GO:0006091//generation of precursor metabolites and energy	COCehwD025222.1	CN01_U03P005010
CN01_13P002790	CN01_13G002790	#N/A	#N/A	ST2,ST1,SULTR1;3,SULTR1;2,LOC100834634,SULTR1;3_1,RCOM_1033950	#N/A	CHE	2466	modules	ISS_3	IPR001902,IPR022796,IPR018045,IPR036513,IPR002645,IPR011547,IPR023329	putative High affinity sulfate transporter 2	sulfate transporter 1,3	LOC_Os08g31410	0.7	0.74	0.97	363.77	274.647	487.29	407.945	-0.40545	0.421754	0.165348	0.530708	0.510383	0.281018	K08917|1|2e-120|431|vvi:100241887|light-harvesting complex II chlorophyll a/b binding protein 6		GO:0031224//intrinsic to membrane	GO:0015291//secondary active transmembrane transporter activity	GO:0015698//inorganic anion transport	COCehwD021178.1	CN01_13P002790
CN01_03P006210	CN01_03G006210	#N/A	HSP20	OsI_027940,Os08g0359500,At3g03773,CXE20,LOC103700647,LOC103722701,ACMD2_19079,ACMD2_22653	#N/A	CHE	564	complete	ISS_1	IPR007052,IPR008978	co-chaperone protein p23-1	HSP20-like chaperones superfamily protein	LOC_Os03g26460.2	0.74	0.72	0.53	350.37	262.93	341.64	458.59	-0.4142	-0.0364024	0.388326	0.530618	0.115273	0.496391	-		-	-	-	COCehwD009473.1	CN01_03P006210
CN01_07P004490	CN01_07G004490	#N/A	#N/A	MARD1,TULP4,LOC103704626,LOC103710804,AXF42_Ash013363,g.43869	#N/A	CHE	309	fragment	ISS_3	IPR007650	putative FCS-Like Zinc finger 3	Protein of unknown function (DUF581)	LOC_Os04g49660	0.53	0.87	0.69	387.63	254.95	376.11	555.475	-0.604466	-0.0435256	0.519042	0.652913	0.11548	0.590102	-		-	-	-	COCehwD027224.1	CN01_07P004490
CN01_04P002970	CN01_04G002970	#N/A	#N/A	EF1,REFA1,EF1A,LOC103702872,EF1-a1,LOC103706658,LOC103708765	#N/A	CHE	2535	modules	ISS_3	IPR031157,IPR036361,IPR000795,IPR009000,IPR027417,IPR004160,IPR004539,IPR004161,IPR003034,IPR009001	putative Elongation factor 1-alpha	GTP binding Elongation factor Tu family protein	LOC_Os03g08020.1	0.97	0.53	1	387.14	224.667	254.423	322.92	-0.785069	-0.605624	-0.261679	0.729062	0.629139	0.378025	K03231|1|0.0|885|rcu:RCOM_1019100|elongation factor 1-alpha		GO:0044424//intracellular part	GO:0016772//transferase activity, transferring phosphorus-containing groups;GO:0017111//nucleoside-triphosphatase activity;GO:0008135//translation factor activity, nucleic acid binding;GO:0032561//guanyl ribonucleotide binding	GO:0006412//translation;GO:0009207	COCehwD007575.5	CN01_04P002970
CN01_scaffold064740P000010	CN01_scaffold064740G000010	ABA	ZF,B-box	COL3,COL5,COL4,COL2,LOC103718406,LOC103707107,LOC103701702	4	CHE	987	complete	ISS_2	IPR000315,IPR010402	Zinc finger protein CONSTANS-LIKE 3	CONSTANS-like 5	LOC_Os02g39710	0.48	0.96	0.92	436.58	221.057	614.5	804.59	-0.98183	0.493167	0.882008	0.78485	0.559446	0.743492	K12135|1|5e-31|133|aly:ARALYDRAFT_488429|zinc finger protein CONSTANS		-	-	-	COCehwD022879.1	CN01_U03P012640
CN01_scaffold017942P000010	CN01_scaffold017942G000010	SOS	ZF,B-box	BBX24,BBX25,BBX22,BBX21,LOC103714623,103996757,STO_0,103988681	42	CHE	1329	modules	ISS_3	IPR000315,IPR011598,IPR036638	putative B-box zinc finger protein 24	salt tolerance homologue	LOC_Os02g39360	0.58	0.55	1	404.917	210.06	519.207	575.635	-0.946824	0.358684	0.507529	0.776939	0.462734	0.584199	K12135|1|6e-15|80.5|aly:ARALYDRAFT_488429|zinc finger protein CONSTANS		-	-	-	COCehwD007700.1	CN01_U02P024060
CN01_14P001300	CN01_14G001300	#N/A	#N/A	SDE3,NAC076,LOC103719163,LOC103719665,ACMD2_06445,MA16_Dca026469	#N/A	CHE	951	complete	ISS_1	IPR013989	B2 protein	DCD (Development and Cell Death) domain protein	LOC_Os01g36950	0.54	0.98	0.98	358.043	183.747	301.33	493.3	-0.962416	-0.24879	0.462331	0.778863	0.360499	0.548842	-		-	-	-	COCehwD023877.1	CN01_14P001300
CN01_15P001100	CN01_15G001100	ABA	LEA-14,YLS9,NHL10	NHL1,NHL12,NHL26,NHL10,LOC103714280,LOC103703140,LOC103699391,ACMD2_07173	15	La-	636	complete	ISS_2	IPR004864	NDR1/HIN1-like protein 1	Late embryogenesis abundant (LEA) hydroxyproline-rich glycoprotein family	LOC_Os12g06260	0.54	0.98	0.99	738.55	715.82	422.71	340.62	-0.0450987	-0.805027	-1.11653	0.132848	0.714027	0.810117	-		-	-	-	COCehwD019673.1	CN01_15P001100
CN01_02P019320	CN01_02G019320	#N/A	CCT	CIA2,COL16,COL6,COL7,LOC103714119,LOC103722614	#N/A	La-	1251	complete	ISS_1	IPR010402	protein CHLOROPLAST IMPORT APPARATUS 2	CCT motif family protein	LOC_Os06g48610	0.36	0.99	0.99	741.693	686.427	453.657	345.65	-0.111717	-0.709222	-1.10151	0.21724	0.677698	0.807436	-		-	-	-	COCehwD021563.1	CN01_02P019320
CN01_08P005080	CN01_08G005080	#N/A	#N/A	CCOAOMT5,CCOAOMT,CCOMT,LOC103713767,CICLE_v10029158mg,CISIN_1g025824mg,CUMW_160510	#N/A	La-	564	fragment	ISS_3	IPR029063,IPR002935	putative Caffeoyl-CoA O-methyltransferase	S-adenosyl-L-methionine-dependent methyltransferases superfamily protein	LOC_Os06g06980	0.88	0.99	0.72	493.627	593.057	297.977	233.3	0.26475	-0.728221	-1.08123	0.397764	0.684386	0.802639	K00588|1|4e-98|354|vvi:100243978|caffeoyl-CoA O-methyltransferase [EC:2.1.1.104]		-	GO:0008168//methyltransferase activity	GO:0006730//one-carbon metabolic process	COCehwD018244.2	CN01_08P005080
CN01_07P004400	CN01_07G004400	#N/A	#N/A	CPN10-1,CPN10-2,CPN20,CPN21,LOC103703578,103975153,groS-A,103972187	#N/A	La-	471	missing_functional_completeness	ISS_4	IPR020818,IPR011032	conserved hypothetical protein	chaperonin 20	LOC_Os06g09679	0.34	0.53	0.35	263.58	482.99	167.7	119.76	0.873752	-0.652358	-1.13809	0.75608	0.645024	0.807864	-		-	-	-	COCehwD009318.1	CN01_07P004400
CN01_16P006890	CN01_16G006890	#N/A	#N/A	EF1,REFA1,LOC103702872,LOC103708774,EF1-a1,LOC103706658	#N/A	La-	1314	complete	ISS_1	IPR000795,IPR004160,IPR004539,IPR009000,IPR031157,IPR027417,IPR009001,IPR004161	Elongation factor 1-alpha	GTP binding Elongation factor Tu family protein	LOC_Os03g08020	0.95	1	1	315.32	447.933	189.807	149.615	0.506467	-0.732286	-1.07556	0.603285	0.682111	0.800052	K03231|1|0.0|837|rcu:RCOM_1019100|elongation factor 1-alpha		GO:0044424//intracellular part	GO:0016772//transferase activity, transferring phosphorus-containing groups;GO:0017111//nucleoside-triphosphatase activity;GO:0008135//translation factor activity, nucleic acid binding;GO:0032561//guanyl ribonucleotide binding	GO:0006412//translation;GO:0009207	COCehwD005777.1	CN01_16P006890
CN01_01P010410	CN01_01G010410	#N/A	#N/A	ADIPOR1,HHP1,HHP2,HHP4,LOC103711480,ACMD2_26905,103629707	#N/A	La-	1041	complete	ISS_1	IPR004254	heptahelical transmembrane protein ADIPOR1	heptahelical transmembrane protein2	LOC_Os06g43620	0.66	0.92	0.86	385.86	444.92	187.203	169.515	0.205468	-1.04347	-1.18666	0.343528	0.78074	0.817897	K07297|1|1e-103|374|bdi:100834261|adiponectin receptor		GO:0044464//cell part	-	-	COCehwD010030.1	CN01_01P010410
CN01_12P006180	CN01_12G006180	#N/A	#N/A	CYP73A12,CYP73A1,CYP73A11,CYP73A10,LOC103706246,LOC103708914,JCGZ_17318	#N/A	La-	789	fragment	ISS_3	IPR036396,IPR001128,IPR002401	putative Trans-cinnamate 4-monooxygenase	cinnamate-4-hydroxylase	LOC_Os01g60450	0.78	1	0.5	354.247	427.747	328.593	129.335	0.272002	-0.108451	-1.45364	0.407007	0.211627	0.847507	K00487|1|5e-115|411|rcu:RCOM_1164350|trans-cinnamate 4-monooxygenase [EC:1.14.13.11]		-	GO:0016709//oxidoreductase activity, acting on paired donors, with incorporation or reduction of molecular oxygen, NAD(P)H as one donor, and incorporation of one atom of oxygen;GO:0005506//iron ion binding	GO:0008152//metabolic process	COCehwD026002.1	CN01_12P006180
CN01_07P002470	CN01_07G002470	#N/A	#N/A	SYT2,SYT1,SYT3,SYT5,LOC103706175,103973655,103982721	#N/A	La-	1584	complete	ISS_1	IPR035892,IPR031468,IPR000008,IPR039010	synaptotagmin-2	Calcium-dependent lipid-binding (CaLB domain) family protein	LOC_Os02g25060	0.79	1	1	316.693	385.803	168.797	144.795	0.284779	-0.9078	-1.12907	0.416208	0.740109	0.807791	-		GO:0031410//cytoplasmic vesicle	-	-	COCehwD005018.1	CN01_07P002470
CN01_contig69057496P000010	CN01_contig69057496G000010	#N/A	#N/A	CYP73A1,CYP73A12,CYP73A13,CYP73A9,c4h2,C4H	#N/A	La-	414	fragment	ISS_3	IPR036396,IPR017972,IPR001128,IPR002401	putative Trans-cinnamate 4-monooxygenase	cinnamate-4-hydroxylase	LOC_Os01g60450	0.83	0.99	0.28	288.77	385.36	262.297	115.51	0.416286	-0.138721	-1.3219	0.539916	0.244639	0.832489	K00487|1|2e-63|238|pop:POPTR_823837|trans-cinnamate 4-monooxygenase [EC:1.14.13.11]		-	GO:0016709//oxidoreductase activity, acting on paired donors, with incorporation or reduction of molecular oxygen, NAD(P)H as one donor, and incorporation of one atom of oxygen;GO:0005506//iron ion binding	GO:0008152//metabolic process	COCehwD000097.1	COCehwD000097.1
CN01_02P017050	CN01_02G017050	ABA	LEA-14,YLS9,NHL10	NHL1,NHL12,NHL26,NHL10,LOC103724082,SYP24,LOC103697963,103995514	15	La-	612	complete	ISS_2	IPR004864	NDR1/HIN1-like protein 1	NDR1/HIN1-like 1	LOC_Os08g01220	0.45	1	1	206.997	330.47	117.937	92.805	0.674912	-0.811595	-1.15733	0.685311	0.706594	0.808803	-		GO:0005618//cell wall	-	-	COCehwD006786.1	CN01_02P017050
CN01_01P014030	CN01_01G014030	#N/A	#N/A	HSP90-5,HSP90-6,HSP90-7,LOC103706592,LOC103719511,103980000	#N/A	La-	2268	complete	ISS_1	IPR001404,IPR019805,IPR036890,IPR020568,IPR037196,IPR020575	heat shock protein 90-5, chloroplastic	Chaperone protein htpG family protein	LOC_Os09g29840	0.78	1	1	355.803	328.477	163.4	162.845	-0.115289	-1.12267	-1.12758	0.229173	0.799887	0.808469	K04079|1|0.0|1139|pop:POPTR_822177|molecular chaperone HtpG		GO:0009532//plastid stroma;GO:0009526//plastid envelope;GO:0031090//organelle membrane	GO:0005515//protein binding;GO:0032559	GO:0010035//response to inorganic substance;GO:0044267//cellular protein metabolic process;GO:0009416//response to light stimulus;GO:0006970//response to osmotic stress;GO:0003006//developmental process involved in reproduction	COCehwD006441.1	CN01_01P014030
CN01_08P005460	CN01_08G005460	#N/A	#N/A	CPN60B2,CPN60B1,CPN60B3,LOC103716830,LOC104592091,MA16_Dca002552,LOC103720995	#N/A	La-	1953	complete	ISS_2	IPR027410,IPR027413,IPR001844,IPR002423,IPR018370,IPR027409	RuBisCO large subunit-binding protein subunit beta, chloroplastic	chaperonin 60 beta	LOC_Os06g02380	0.93	0.83	0.9	161.807	320.69	86.9533	56.175	0.986908	-0.895958	-1.52627	0.785595	0.728595	0.848467	K04077|1|0.0|922|bdi:100842360|chaperonin GroEL		GO:0009536//plastid	GO:0005515//protein binding;GO:0032559	GO:0006457//protein folding	COCehwD027755.1	CN01_08P005460
CN01_03P016230	CN01_03G016230	#N/A	#N/A	AT9,AT10,AT4,AT7,LOC103720854,103975333,4325654	#N/A	La-	1233	complete	ISS_1	IPR023213,IPR003480	acyl transferase 9	HXXXD-type acyl-transferase family protein	LOC_Os01g09010	0.67	0.97	0.96	288.793	290.567	174.46	128.84	0.00883177	-0.727141	-1.16446	0.0772945	0.681573	0.811723	K15400|1|4e-45|180|pop:POPTR_797957|omega-hydroxypalmitate O-feruloyl transferase [EC:2.3.1.188]		-	-	-	COCehwD006473.1	CN01_03P016230
CN01_04P010810	CN01_04G010810	#N/A	#N/A	ACLB-1,ACLB-2,At5g23250,LOC103700998,LOC103720655,ACMD2_01703	#N/A	La-	1827	complete	ISS_1	IPR036291,IPR036969,IPR017866,IPR016102,IPR017440,IPR002020,IPR005811,IPR033847,IPR016143	ATP-citrate synthase beta chain protein 1	ATP-citrate lyase B-1	LOC_Os01g19450	0.93	1	1	190.5	255.953	148.96	83.22	0.42609	-0.354866	-1.19479	0.544669	0.449069	0.812192	K01648|1|0.0|1098|osa:4325777|ATP citrate (pro-S)-lyase [EC:2.3.3.8]		GO:0043234//protein complex;GO:0044444//cytoplasmic part;GO:0016020//membrane	GO:0004774//succinate-CoA ligase activity;GO:0046912//transferase activity, transferring acyl groups, acyl groups converted into alkyl on transfer	GO:0005975//carbohydrate metabolic process;GO:0006084//acetyl-CoA metabolic process	COCehwD006965.2	CN01_04P010810
CN01_01P002110	CN01_01G002110	#N/A	GST	GSTF1,GST1,GSTF2,GSTF13,GST,LOC103718626,LOC103718625	34	La-	651	complete	ISS_1	IPR010987,IPR034347,IPR004046,IPR004045,IPR036249,IPR036282	Glutathione S-transferase	Glutathione S-transferase family protein	LOC_Os01g27630	0.54	1	1	206.027	246.253	193.89	70	0.257312	-0.0875927	-1.5574	0.394253	0.186875	0.85438	K00799|1|2e-68|256|sbi:SORBI_06g028630|glutathione S-transferase [EC:2.5.1.18]		GO:0031410//cytoplasmic vesicle	-	-	COCehwD026985.1	CN01_01P002110
CN01_scaffold078790P000010	CN01_scaffold078790G000010	CAPLC	PLD	PLD1,LOC103718527,LOC103708746	37	La-	2604	complete	ISS_1	IPR015679,IPR024632,IPR001736,IPR000008,IPR011402,IPR035892	phospholipase D alpha 1	phospholipase D alpha 1	LOC_Os01g07760	0.82	0.92	0.99	233.137	218.457	138.943	93.7	-0.0938288	-0.746679	-1.31505	0.190829	0.687661	0.830465	K01115|1|0.0|1405|osa:4327647|phospholipase D [EC:3.1.4.4]		GO:0043231//intracellular membrane-bounded organelle;GO:0016020//membrane	GO:0046872//metal ion binding;GO:0004620//phospholipase activity	GO:0006650//glycerophospholipid metabolic process	COCehwD025383.1	CN01_U03P011370
CN01_05P009670	CN01_05G009670	#N/A	#N/A	PHP2,ORRM1,BHLH110,Smarcal1_0,RchiOBHm_Chr4g0436301,PRUPE_1G302400,ACMD2_26281	#N/A	La-	201	fragment	ISS_3	#N/A	putative SWI/SNF-related matrix-associated actin-dependent regulator of chromatin subfamily A-like protein 1	Plant calmodulin-binding protein-related	LOC_Os04g21710	0.36	0.58	0.1	224.55	217.88	119.34	94.77	-0.0435029	-0.911959	-1.24453	0.119177	0.73729	0.820077	-		-	-	-	COCehwD003122.1	CN01_05P009670
CN01_02P014980	CN01_02G014980	#N/A	#N/A	SAHH,LOC103717175,LOC103710610,SAHH_2,LOC103696915	#N/A	La-	1458	complete	ISS_1	IPR000043,IPR036291,IPR015878,IPR020082,IPR034373	Adenosylhomocysteinase	S-adenosyl-L-homocysteine hydrolase	LOC_Os11g26850	0.92	0.93	1	190.593	217.033	104	63.085	0.187419	-0.873914	-1.59513	0.31891	0.7227	0.858166	K01251|1|0.0|856|zma:100282150|adenosylhomocysteinase [EC:3.3.1.1]		-	-	-	COCehwD015725.1	CN01_02P014980
CN01_04P011610	CN01_04G011610	#N/A	#N/A	SAMS,SAM1,SAM4,LOC103701045,LOC103709644,100191838	#N/A	La-	1401	complete	ISS_2	IPR002133,IPR022629,IPR022636,IPR022631,IPR022630,IPR022628	S-adenosylmethionine synthase	S-adenosylmethionine synthetase 1	LOC_Os05g04510	0.94	0.85	1	278.57	208.49	132.017	98.855	-0.418062	-1.07732	-1.49465	0.538033	0.789752	0.848602	K00789|1|0.0|736|rcu:RCOM_1436370|S-adenosylmethionine synthetase [EC:2.5.1.6]		GO:0044424//intracellular part	GO:0046872//metal ion binding;GO:0016765//transferase activity, transferring alkyl or aryl (other than methyl) groups;GO:0032559	GO:0044237//cellular metabolic process	COCehwD024132.1	CN01_04P011610
CN01_scaffold002996P000040	CN01_scaffold002996G000040	#N/A	#N/A	SAHH,LOC103710610,LOC103696915,LOC103717175,SAHH_2	#N/A	La-	1458	complete	ISS_1	IPR000043,IPR020082,IPR034373,IPR036291,IPR015878	Adenosylhomocysteinase	S-adenosyl-L-homocysteine hydrolase	LOC_Os11g26850	0.92	0.93	1	142.803	200.35	88.1167	62.105	0.488493	-0.696543	-1.20125	0.583502	0.660689	0.809116	K01251|1|0.0|858|zma:100282150|adenosylhomocysteinase [EC:3.3.1.1]		GO:0044424//intracellular part	GO:0016802	GO:0044237//cellular metabolic process	COCehwD013600.1	CN01_U02P005110
CN01_05P008090	CN01_05G008090	#N/A	#N/A	SUS1,LOC103702434,LOC103714824,LOC103702464	#N/A	La-	2328	complete	ISS_1	IPR000368,IPR001296,IPR012820	sucrose synthase 2	sucrose synthase 4	LOC_Os03g28330	0.86	0.99	0.94	314.753	177.047	147.62	109.305	-0.830092	-1.09233	-1.52586	0.740485	0.793854	0.854829	K00695|1|0.0|1379|sbi:SORBI_01g033060|sucrose synthase [EC:2.4.1.13]		-	-	-	COCehwD015786.1	CN01_05P008090
CN01_09P000660	CN01_09G000660	#N/A	#N/A	ACBP3,ACABP,ACBP1,MANES_15G182400,CUMW_202150,LOC103696487,CICLE_v10002973mg	#N/A	La-	363	complete	ISS_2	IPR000582,IPR035984,IPR022408	Acyl-CoA-binding protein	acyl-CoA-binding protein 6	LOC_Os08g06550	0.61	0.93	0.86	170.8	155.373	102.903	71.27	-0.136569	-0.731018	-1.26094	0.254556	0.675671	0.820275	K08762|1|5e-33|137|osa:4333305|diazepam-binding inhibitor (GABA receptor modulator, acyl-CoA-binding protein)		-	GO:0005488//binding	-	COCehwD000884.2	CN01_09P000660
CN01_scaffold003742P000040	CN01_scaffold003742G000040	#N/A	#N/A	TUBB2,TUBB4,TUBB6,BVC80_8897g1,TUB6	#N/A	La-	258	complete	ISS_1	IPR000217,IPR002453,IPR023123,IPR008280	Tubulin	tubulin beta 8	LOC_Os02g07060	0.91	0.99	0.19	154.213	151.49	113.477	68.57	-0.0257049	-0.442532	-1.16928	0.104388	0.515706	0.80631	K07375|1|2e-27|118|mtr:MTR_7g089120|tubulin beta		-	-	-	COCehwD016210.1	CN01_U02P008230
CN01_13P006630	CN01_13G006630	#N/A	#N/A	ACMD2_26281,PRUPE_1G302400,RCOM_0704120,RchiOBHm_Chr4g0436301	#N/A	La-	156	complete	ISS_4	#N/A	conserved hypothetical protein	#N/A	LOC_Os01g45470	0.58	0.71	0.72	277.697	147.72	156.44	128.445	-0.910645	-0.8279	-1.11236	0.762095	0.715819	0.803932	-		-	-	-	COCehwD008968.1	CN01_13P006630
CN01_scaffold021036P000010	CN01_scaffold021036G000010	#N/A	#N/A	BTF3,At1g73230,ASPG2,AKHSDH2,LOC103721473,LOC103721486,LOC104596832	#N/A	La-	459	complete	ISS_1	IPR002715,IPR038187,IPR039370	nascent polypeptide-associated complex subunit beta	basic transcription factor 3	LOC_Os03g63400	0.78	0.99	0.96	101.997	145.747	45.2433	29.47	0.514941	-1.17274	-1.7912	0.592442	0.790869	0.862443	K01527|1|3e-69|258|vvi:100242819|nascent polypeptide-associated complex subunit beta		-	-	-	COCehwD009648.1	CN01_U03P006310
CN01_04P009130	CN01_04G009130	#N/A	#N/A	unknown_gene	#N/A	La-	219	missing_functional_completeness	ISS_5	#N/A	hypothetical protein	Small nuclear ribonucleoprotein family protein	LOC_Os07g07220	0.34	0.79	0.18	100.503	135.793	122.93	35.57	0.434169	0.290594	-1.49851	0.536612	0.389836	0.835346	-		-	-	-	COCehwD020701.1	CN01_04P009130
CN01_16P007600	CN01_16G007600	#N/A	#N/A	KIN12E,LOC103720010,LOC103710838	#N/A	La-	969	complete	ISS_4	#N/A	conserved hypothetical protein	#N/A	LOC_Os05g02260	0.38	0.62	0.73	145.707	135.087	65.8567	65.08	-0.109182	-1.14567	-1.16278	0.213191	0.79564	0.803922	-		-	-	-	COCehwD005706.2	CN01_16P007600
CN01_06P018030	CN01_06G018030	#N/A	#N/A	RPL32A,RPL32B,RPL32,KEU,LOC103709421	#N/A	La-	432	complete	ISS_1	IPR001515,IPR036351	60S ribosomal protein L32-1	Ribosomal protein L32e	LOC_Os08g41300	0.92	0.92	0.99	123.193	131.71	59.9633	51.38	0.0964407	-1.03877	-1.26165	0.200472	0.767564	0.8148	K02912|1|5e-61|230|osa:4346086|large subunit ribosomal protein L32e		GO:0030529//ribonucleoprotein complex	GO:0005198//structural molecule activity	GO:0010467//gene expression	COCehwD001485.1	CN01_06P018030
CN01_01P005740	CN01_01G005740	#N/A	#N/A	NAT6,NAT7,NAT5,NAT8,LOC103699248,LOC103719039,LOC103719166,103996234	#N/A	La-	1629	complete	ISS_1	IPR006043	nucleobase-ascorbate transporter 6	Xanthine/uracil permease family protein	LOC_Os08g32500	0.8	0.98	0.99	190.307	128.317	88.48	75.67	-0.568618	-1.1049	-1.33053	0.630034	0.791634	0.829881	K14611|1|0.0|866|pop:POPTR_570060|solute carrier family 23 (nucleobase transporter), member 1/2		GO:0044464//cell part	-	GO:0006810//transport	COCehwD004452.2	CN01_01P005740
CN01_01P014870	CN01_01G014870	#N/A	#N/A	EIF-5A2,EIF5A4,LOC103707794,L484_013212	#N/A	La-	480	complete	ISS_1	IPR001884,IPR014722,IPR012340,IPR020189,IPR019769,IPR008991	Eukaryotic translation initiation factor 5A-2	eukaryotic elongation factor 5A-1	LOC_Os12g32240	0.93	0.99	0.99	159.093	125.817	81.2033	57.96	-0.33855	-0.970263	-1.45674	0.466802	0.751444	0.84078	K03263|1|2e-84|308|gmx:100499632|translation initiation factor 5A		-	-	-	COCehwD006657.1	CN01_01P014870
CN01_02P019560	CN01_02G019560	#N/A	#N/A	CIP1,PUB33,HDA18,KIN14D,LOC103713104,LOC103715520	#N/A	La-	1347	complete	ISS_1	#N/A	myosin-3-like	myosin heavy chain-related	LOC_Os08g40790	0.62	0.89	0.87	107.133	123.03	53.7467	44.065	0.199603	-0.99516	-1.2817	0.325491	0.754244	0.813559	K06674|1|1e-06|53.1|pop:POPTR_826684|structural maintenance of chromosome 2;K06669|2|4e-06|51.2|ota:Ot09g02120|structural maintenance of chromosome 3 (chondroitin sulfate proteoglycan 6)		GO:0031410//cytoplasmic vesicle	-	-	COCehwD004206.2	CN01_02P019560
CN01_06P004580	CN01_06G004580	#N/A	#N/A	PLR_Tp2,PLR1,PLR_Tp1,103981518,ACMD2_03733,IFRH_4,IFRH_18	#N/A	La-	585	fragment	ISS_3	IPR036291,IPR008030	putative Bifunctional pinoresinol-lariciresinol reductase 2	pinoresinol reductase 1	LOC_Os12g16220	0.44	0.99	0.61	133.777	122.327	104.933	55.95	-0.129088	-0.350353	-1.25762	0.240312	0.445097	0.816322	K00224|1|2e-43|173|aly:ARALYDRAFT_658933|[EC:1.3.1.-];K13081|5|1e-24|110|vvi:100233112|leucoanthocyanidin reductase [EC:1.17.1.3]		-	-	-	COCehwD018763.1	CN01_06P004580
CN01_02P012700	CN01_02G012700	#N/A	#N/A	INT1,INT2,INT3,INT4,LOC103708562,LOC103717543	#N/A	La-	1407	complete	ISS_2	IPR005828,IPR011701,IPR020846,IPR005829,IPR003663,IPR036259	Inositol transporter 1	inositol transporter 1	LOC_Os04g41460	0.71	0.99	0.99	215.863	110.293	108.96	91.91	-0.968773	-0.98632	-1.23182	0.777483	0.761849	0.818179	K08150|1|4e-173|605|sbi:SORBI_06g021070|MFS transporter, SP family, solute carrier family 2 (myo-inositol transporter), member 13		GO:0000325//plant-type vacuole;GO:0016020//membrane	GO:0005365//myo-inositol transmembrane transporter activity	GO:0015791//polyol transport	COCehwD009531.1	CN01_02P012700
CN01_16P005440	CN01_16G005440	#N/A	#N/A	SAMS,METK3,SAM4,SAM1,LOC103701045,LOC103709644,BAE44_0013315,4337733	#N/A	La-	1206	complete	ISS_1	IPR022636,IPR022631,IPR022628,IPR002133,IPR022629,IPR022630	S-adenosylmethionine synthase	S-adenosylmethionine synthetase 1	LOC_Os05g04510	0.93	0.99	1	113.373	103.273	63.2067	30.445	-0.134614	-0.842933	-1.8968	0.239147	0.705381	0.869285	K00789|1|0.0|736|sbi:SORBI_03g011930|S-adenosylmethionine synthetase [EC:2.5.1.6]		GO:0044424//intracellular part	GO:0046872//metal ion binding;GO:0016765//transferase activity, transferring alkyl or aryl (other than methyl) groups;GO:0032559	GO:0044237//cellular metabolic process	COCehwD026074.1	CN01_16P005440
CN01_scaffold000534P000020	CN01_scaffold000534G000020	#N/A	#N/A	CML1,At5g22610,At1g80150,NRAT1,LOC103703853,LOC103708681,103984544,Hiat1_1	#N/A	La-	612	fragment	ISS_3	IPR011701,IPR036259	putative hippocampus abundant transcript 1 protein	Major facilitator superfamily protein	LOC_Os02g44730	0.63	0.98	0.94	104.077	79.2233	63.4333	43.255	-0.393649	-0.714334	-1.26671	0.499724	0.658055	0.812046	-		GO:0016020//membrane;GO:0031410//cytoplasmic vesicle	GO:0005215//transporter activity	GO:0006810//transport;GO:0042221//response to chemical stimulus	COCehwD020326.1	CN01_U01P015000
CN01_01P003180	CN01_01G003180	#N/A	#N/A	CAD,ELI3,10HGO,LOC103721088,LOC103721082,TorRG33x02_071250,CAD1	#N/A	La-	687	fragment	ISS_3	IPR013149,IPR036291,IPR011032	putative mannitol dehydrogenase	cinnamyl alcohol dehydrogenase 6	LOC_Os10g29470	0.69	1	0.62	149.663	78.4367	70.2767	52.23	-0.932121	-1.0906	-1.51877	0.762254	0.785725	0.846579	K00083|1|5e-77|285|pop:POPTR_667694|cinnamyl-alcohol dehydrogenase [EC:1.1.1.195]		-	GO:0046872//metal ion binding;GO:0003824//catalytic activity	GO:0008152//metabolic process	COCehwD003316.2	CN01_01P003180
CN01_04P003840	CN01_04G003840	#N/A	#N/A	PRA1B4,PRA1B3,PRA1B1,PRA1B5,LOC103708863,LOC103714372	#N/A	La-	699	complete	ISS_1	IPR004895	PRA1 family protein	prenylated RAB acceptor 1.B2	LOC_Os01g61170	0.51	0.93	0.98	109.647	59.2033	53.5	39.72	-0.889112	-1.03525	-1.46492	0.742602	0.764765	0.834189	-		-	-	-	COCehwD018612.1	CN01_04P003840
CN01_scaffold026260P000010	CN01_scaffold026260G000010	#N/A	#N/A	Smt1-1,SMT1,SMT2,SMT3,LOC103717656,LOC103697536,103979889	#N/A	La-	1044	complete	ISS_2	IPR013216,IPR029063,IPR013705,IPR030384	Cycloartenol-C-24-methyltransferase 1	sterol methyltransferase 1	LOC_Os07g10600	0.61	0.99	1	2549.45	1716.96	975.323	1251.39	-0.570328	-1.38623	-1.02665	0.63989	0.839759	0.791531	K00559|1|1e-127|454|vvi:100252116|sterol 24-C-methyltransferase [EC:2.1.1.41]		-	-	-	COCehwD012252.1	CN01_U03P001660
CN01_08P001620	CN01_08G001620	#N/A	#N/A	ARPN,103995246,LOC103715032,AQUCO_06900053v1	#N/A	La-	381	complete	ISS_1	IPR039391,IPR003245,IPR008972	basic blue protein	plantacyanin	LOC_Os03g50160	0.7	0.99	0.99	317.353	635.55	138.48	171.135	1.00192	-1.19641	-0.890955	0.792465	0.810781	0.741562	-		-	GO:0046872//metal ion binding	-	COCehwD010232.1	CN01_08P001620
CN01_16P007930	CN01_16G007930	#N/A	MT	MT4A,MTA,MT1,LOC103721984,LOC103703488,LOC103703028	63	La-	240	complete	ISS_1	IPR000347	metallothionein-like protein type 2	metallothionein 2A	LOC_Os01g05650	0.63	0.87	0.87	1133.75	616.403	448.347	680.64	-0.879152	-1.33841	-0.736134	0.760867	0.834443	0.699906	-		GO:0030529//ribonucleoprotein complex	GO:0043169//cation binding;GO:0005198//structural molecule activity	GO:0010467//gene expression	COCehwD005673.1	CN01_16P007930
CN01_scaffold024305P000010	CN01_scaffold024305G000010	#N/A	#N/A	MNB1B,HMGB2,LOC103723255,LOC103701106,104000484	#N/A	La-	462	complete	ISS_1	IPR009071,IPR036910	DNA-binding protein MNB1B	high mobility group B4	LOC_Os02g44930	0.5	0.92	0.92	815.703	501.207	349.967	432.565	-0.702639	-1.22083	-0.915128	0.700161	0.817455	0.755069	K10802|1|6e-35|144|vvi:100257544|high mobility group protein B1		-	GO:0003676//nucleic acid binding	-	COCehwD011440.1	CN01_U03P013610
CN01_scaffold002569P000020	CN01_scaffold002569G000020	#N/A	#N/A	FAR3,FAR4,FAR1,LOC103715392,103988494,103999397	#N/A	La-	1545	complete	ISS_2	IPR033640,IPR036291,IPR026055,IPR013120	Fatty acyl-CoA reductase 3	fatty acid reductase 1	LOC_Os08g20200	0.6	0.81	0.87	593.953	413.6	249.943	303.365	-0.522113	-1.24875	-0.969295	0.610217	0.822081	0.770359	K13356|1|8e-146|515|bdi:100822349|fatty acyl-CoA reductase [EC:1.2.1.-]		-	GO:0003824//catalytic activity	GO:0008152//metabolic process	COCehwD012099.1	CN01_U02P017440
CN01_13P001930	CN01_13G001930	#N/A	#N/A	FDH,KCS4,KCS11,KCS9,LOC103714812,LOC103702285,BVC80_8577g7	#N/A	La-	2031	modules	ISS_3	IPR020818,IPR013747,IPR016039,IPR037124,IPR012392,IPR013601,IPR011032	putative 3-ketoacyl-CoA synthase 10	3-ketoacyl-CoA synthase 10	LOC_Os03g08360	0.8	0.74	0.94	485.2	251.42	224.14	278.78	-0.94848	-1.11418	-0.799452	0.777794	0.800101	0.717814	K15397|1|0.0|822|pop:POPTR_561555|3-ketoacyl-CoA synthase [EC:2.3.1.-]		GO:0044464//cell part	GO:0016747//transferase activity, transferring acyl groups other than amino-acyl groups	GO:0006631//fatty acid metabolic process	COCehwD023616.1	CN01_13P001930
CN01_06P008510	CN01_06G008510	#N/A	#N/A	MYOB6,accD,LOC103708168,TCM_047030,LOC104591411,PHAVU_003G061900g	#N/A	La-	318	complete	ISS_4	IPR006476	conserved hypothetical protein	Plant protein 1589 of unknown function	LOC_Os05g38680	0.46	0.71	0.74	124.117	158.71	53.2767	79.325	0.354696	-1.22012	-0.645849	0.475203	0.802197	0.643794	-		-	-	-	COCehwD015257.1	CN01_06P008510
CN01_contig69287513P000010	CN01_contig69287513G000010	#N/A	#N/A	RPP2B,RPP2A,RPP2D,LOC107908706,LOC103712701,B456_004G009000,GOBAR_DD14159	#N/A	La-	345	complete	ISS_1	IPR038716,IPR027534	60S acidic ribosomal protein P2A	60S acidic ribosomal protein family	LOC_Os05g37330	0.66	0.99	0.99	114.067	155.83	46.6033	58.415	0.450096	-1.29137	-0.965466	0.553643	0.80996	0.753212	K02943|1|1e-20|95.9|vvi:100254522|large subunit ribosomal protein LP2		GO:0030529//ribonucleoprotein complex	GO:0005198//structural molecule activity	GO:0006412//translation	COCehwD000286.1	COCehwD000286.1
CN01_scaffold002605P000010	CN01_scaffold002605G000010	#N/A	#N/A	HSP22,HSP21,HSP26.7,LOC103722921,HSP21_5	#N/A	La-	705	complete	ISS_2	IPR008978,IPR002068	Small heat shock protein, chloroplastic	heat shock protein 21	LOC_Os03g14180	0.59	0.93	0.95	298.097	147.58	77.1467	223.375	-1.01428	-1.9501	-0.416313	0.791555	0.878218	0.517814	K13993|1|2e-22|103|ppp:PHYPADRAFT_81689|HSP20 family protein		-	-	GO:0000302//response to reactive oxygen species;GO:0009642//response to light intensity	COCehwD012188.1	CN01_U01P014350
CN01_06P003790	CN01_06G003790	#N/A	#N/A	RPL37A,RPL37C,RPL37B,RPL37,LOC103708991,LOC103721543,LOC103703893	#N/A	La-	291	complete	ISS_1	IPR001569,IPR011332,IPR011331,IPR018267	60S ribosomal protein L37-1	Zinc-binding ribosomal protein family protein	LOC_Os02g56990	0.86	0.98	0.99	110.753	144	45.6567	54.03	0.378719	-1.27845	-1.03552	0.497986	0.808181	0.773967	K02922|1|4e-48|187|osa:4328048|large subunit ribosomal protein L37e		GO:0043231//intracellular membrane-bounded organelle;GO:0030529//ribonucleoprotein complex	GO:0043169//cation binding;GO:0003723//RNA binding;GO:0005198//structural molecule activity	GO:0010467//gene expression	COCehwD016500.1	CN01_06P003790
CN01_10P005240	CN01_10G005240	#N/A	#N/A	IQD32,IQD1,IQD31,IQD14,LOC103711147,LOC103714147	#N/A	La-	1497	complete	ISS_1	IPR000048,IPR025064	protein IQ-DOMAIN 1	IQ-domain 22	LOC_Os04g48160	0.58	1	1	237.38	143.16	101.547	142.395	-0.72957	-1.22506	-0.7373	0.705486	0.812952	0.693169	-		-	-	-	COCehwD002343.1	CN01_10P005240
CN01_12P007740	CN01_12G007740	#N/A	#N/A	ECR,DET2,LOC103696797,LOC103703465,103987000,BVC80_1835g788	#N/A	La-	1221	modules	ISS_3	IPR029071,IPR001104,IPR039357	putative Very-long-chain enoyl-CoA reductase	3-oxo-5-alpha-steroid 4-dehydrogenase family protein	LOC_Os01g05670	0.84	0.76	1	263.287	141.457	118.043	152.205	-0.896274	-1.15732	-0.790619	0.759515	0.804086	0.711108	K10258|1|2e-149|527|sbi:SORBI_03g006070|enoyl reductase [EC:1.3.1.-]		GO:0005789//endoplasmic reticulum membrane;GO:0031224//intrinsic to membrane	GO:0033765;GO:0016628//oxidoreductase activity, acting on the CH-CH group of donors, NAD or NADP as acceptor;GO:0004312//fatty acid synthase activity	GO:0006633//fatty acid biosynthetic process;GO:0006643//membrane lipid metabolic process	COCehwD026418.1	CN01_12P007740
CN01_11P002890	CN01_11G002890	#N/A	#N/A	RBG2,RBG4,RPS19,RBG3,LOC103710613,ACMD2_09095,103990800	#N/A	La-	474	complete	ISS_1	IPR000504,IPR035979,IPR012677	glycine-rich RNA-binding protein 4, mitochondrial-like	glycine-rich RNA-binding protein 4	LOC_Os01g68790	0.6	0.76	0.77	113.647	140.847	39.0567	52.575	0.30957	-1.54091	-1.11211	0.436956	0.838456	0.791708	K02965|1|6e-24|107|ath:AT5G47320|small subunit ribosomal protein S19;K13195|2|2e-14|76.3|pop:POPTR_712972|cold-inducible RNA-binding protein;K11294|3|2e-12|69.3|smo:SELMODRAFT_15428|nucleolin		GO:0043231//intracellular membrane-bounded organelle	GO:0046914//transition metal ion binding;GO:0043566//structure-specific DNA binding;GO:0032559	GO:0032501//multicellular organismal process;GO:0006950//response to stress	COCehwD007332.1	CN01_11P002890
CN01_11P013310	CN01_11G013310	#N/A	CCT	CIA2,COL16,COL7,COL6,LOC103722614,LOC103714119	#N/A	La-	1335	complete	ISS_2	IPR010402	protein CHLOROPLAST IMPORT APPARATUS 2	chloroplast import apparatus 2	LOC_Os02g05470	0.42	0.92	0.98	226.103	126.98	98.3167	158.985	-0.832381	-1.20147	-0.508092	0.737498	0.807947	0.578828	-		-	-	-	COCehwD016457.1	CN01_11P013310
CN01_04P005050	CN01_04G005050	#N/A	#N/A	Os07g0682400,Os03g0328900,Os03g0329200,At3g51950,LOC103709112,LOC103705894,LOC103702192	#N/A	La-	2175	complete	ISS_1	IPR012677,IPR000571,IPR036855,IPR035979,IPR000504,IPR034365	zinc finger CCCH domain-containing protein 53	Zinc finger (CCCH-type) family protein / RNA recognition motif (RRM)-containing protein	LOC_Os07g48410	0.57	1	1	187.417	116.23	82.01	151.355	-0.689267	-1.19238	-0.308313	0.687173	0.80481	0.420786	-		-	-	-	COCehwD016408.1	CN01_04P005050
CN01_08P003300	CN01_08G003300	#N/A	#N/A	VIT_01s0010g01870,Os04g0281900,OsI_15195,RCOM_0477780,LOC103714482,LOC103717786,ACMD2_26973	#N/A	La-	615	complete	ISS_1	IPR006702,IPR006459	CASP-like protein 2A1	Uncharacterised protein family (UPF0497)	LOC_Os04g21320	0.62	0.85	0.83	123.59	92.12	53.1	67.055	-0.423976	-1.21878	-0.882145	0.527873	0.802086	0.727076	-		GO:0016020//membrane	-	GO:0009628//response to abiotic stimulus	COCehwD008832.1	CN01_08P003300
CN01_07P002350	CN01_07G002350	#N/A	#N/A	SBT1.6,SBT1.5,SBT1.8,SBT1.7,LOC103706170,LOC103700878,ARA12	#N/A	La-	2361	complete	ISS_1	IPR003137,IPR036852,IPR037045,IPR000209,IPR034197,IPR015500,IPR010259,IPR041469,IPR023828	subtilisin-like protease SBT1.6	subtilisin-like serine protease 2	LOC_Os03g13930	0.72	0.95	0.96	125.267	82.5333	44.8633	72.14	-0.601954	-1.48139	-0.796131	0.638945	0.83192	0.703431	-		-	GO:0070011//peptidase activity, acting on L-amino acid peptides	GO:0008152//metabolic process	COCehwD005030.1	CN01_07P002350
CN01_contig68186553P000010	CN01_contig68186553G000010	#N/A	#N/A	CER2,CER26L,CER26,HST,LOC103716202,103993646,ACMD2_11363	#N/A	La-	459	fragment	ISS_3	IPR023213,IPR003480	putative Protein ECERIFERUM 2	HXXXD-type acyl-transferase family protein	LOC_Os04g52164	0.52	0.95	0.57	139.713	80.21	45.8667	67.37	-0.800616	-1.60695	-1.05229	0.72044	0.849888	0.780851	K13065|1|1e-09|60.1|vvi:100265530|shikimate O-hydroxycinnamoyltransferase [EC:2.3.1.133]		-	-	-	COCehwD000005.1	COCehwD000005.1
CN01_scaffold154227P000010	CN01_scaffold154227G000010	#N/A	#N/A	CHSA,LPR1,SWI3C,LG2,LOC103717227,A4U43_UnF9000,ACMD2_02651	#N/A	La-	495	fragment	ISS_3	#N/A	putative uncharacterized WD repeat-containing protein C2A9.03	Transducin/WD40 repeat-like superfamily protein	LOC_Os02g48964	0.47	0.69	0.24	160.6	79.5633	67.7533	86.135	-1.0133	-1.24511	-0.8988	0.784429	0.812118	0.736587	-		GO:0031461//cullin-RING ubiquitin ligase complex	-	-	COCehwD006156.1	CN01_U03P017690
CN01_07P006410	CN01_07G006410	#N/A	#N/A	HOX6,ATHB-12,ATHB-7,LOC103708469,LOC103722052,ACMD2_13259,ACMD2_10671	#N/A	La-	606	complete	ISS_1	IPR001356,IPR003106,IPR017970,IPR009057,IPR000047	homeobox-leucine zipper protein HOX6	homeobox 7	LOC_Os04g45810	0.43	0.95	0.72	132.093	67.97	45.0333	143.605	-0.958588	-1.55249	0.120548	0.766799	0.841876	0.219869	K09338|1|4e-35|145|ath:AT3G61890|homeobox-leucine zipper protein		GO:0043231//intracellular membrane-bounded organelle	GO:0003677//DNA binding;GO:0001071//nucleic acid binding transcription factor activity	GO:0006351//transcription, DNA-dependent	COCehwD001301.1	CN01_07P006410
CN01_14P012290	CN01_14G012290	#N/A	#N/A	TIC,LOC103717653	#N/A	La-	4557	complete	ISS_2	IPR039317	protein TIME FOR COFFEE	time for coffee	LOC_Os07g38360	0.36	0.95	0.99	104.873	51.41	40.25	53.99	-1.02853	-1.38159	-0.957884	0.779787	0.818792	0.747184	-		-	-	-	COCehwD021606.1	CN01_14P012290
CN01_02P003550	CN01_02G003550	ABA.12	BURP	BURP3,BURP6,BURP5,BURP17,LOC103712986,LOC103701411,LOC103699936,RD22	12	La-	597	complete	ISS_2	IPR004873	BURP domain-containing protein 6	BURP domain-containing protein	LOC_Os01g53240	0.61	0.97	0.47	9252.38	7268.12	2110.99	1849.8	-0.348242	-2.1319	-2.32246	0.485425	0.891987	0.902076	-		-	-	-	COCehwD000997.1	CN01_02P003550
CN01_12P006310	CN01_12G006310	ABA	LTP,2S	MALD3,LOC103699469,LOC103698517,LOC103713416	20	La-	354	complete	ISS_2	IPR036312,IPR016140,IPR000528	Non-specific lipid-transfer protein	lipid transfer protein 1	LOC_Os12g02310	0.61	0.81	0.83	4649.66	4153.79	1932.71	2202.47	-0.162695	-1.2665	-1.07801	0.286588	0.826514	0.805653	-		-	GO:0005488//binding	GO:0051234//establishment of localization;GO:0010876//lipid localization	COCehwD004902.1	CN01_12P006310
CN01_01P000400	CN01_01G000400	#N/A	#N/A	SAMS,METK,SAM1,LOC103714941,ACMD2_02478,LOC103698366,103990868	#N/A	La-	1185	complete	ISS_1	IPR022636,IPR002133,IPR022631,IPR022628,IPR022630,IPR022629	S-adenosylmethionine synthase	S-adenosylmethionine synthetase 1	LOC_Os05g04510	0.95	0.99	0.99	2688.37	1357.65	1059.25	953.6	-0.985618	-1.34369	-1.49528	0.790506	0.835264	0.855444	K00789|1|0.0|739|rcu:RCOM_1343960|S-adenosylmethionine synthetase [EC:2.5.1.6]		GO:0044424//intracellular part	GO:0046872//metal ion binding;GO:0016765//transferase activity, transferring alkyl or aryl (other than methyl) groups;GO:0032559	GO:0044237//cellular metabolic process	COCehwD025138.1	CN01_01P000400
CN01_scaffold013137P000010	CN01_scaffold013137G000010	#N/A	#N/A	PPO,LOC103721490,LOC103715357,LOC103721493	#N/A	La-	1605	complete	ISS_1	IPR002227,IPR022740,IPR008922,IPR022739	polyphenol oxidase, chloroplastic	#N/A	LOC_Os04g53300	0.43	0.98	0.9	1325.54	1310.8	365.193	136.52	-0.0161399	-1.85985	-3.2794	0.0902275	0.87728	0.915081	K00422|1|4e-105|380|vvi:100256583|polyphenol oxidase [EC:1.10.3.1]		-	-	-	COCehwD004073.1	CN01_U03P004350
CN01_13P001670	CN01_13G001670	#N/A	#N/A	SUS1,LOC103714824,LOC103702434,LOC103702464	#N/A	La-	2448	complete	ISS_1	IPR012820,IPR000368,IPR001296	sucrose synthase 1	sucrose synthase 4	LOC_Os07g42490	0.84	0.99	0.99	942.627	1042.73	401.257	316.66	0.145603	-1.23216	-1.57375	0.270641	0.819454	0.86287	K00695|1|0.0|1427|sbi:SORBI_01g033060|sucrose synthase [EC:2.4.1.13]		-	GO:0035251//UDP-glucosyltransferase activity	GO:0005984//disaccharide metabolic process	COCehwD027702.1	CN01_13P001670
CN01_14P008950	CN01_14G008950	#N/A	#N/A	JAL19,LOC103700309,LOC103717798,LOC103698094,LSAT_9X118500	#N/A	La-	501	complete	ISS_2	IPR001229,IPR036404,IPR033734	mannose/glucose-specific lectin-like	S-locus lectin protein kinase family protein	LOC_Os11g39530	0.36	0.89	0.26	736.44	912.58	174.767	122.52	0.309383	-2.07514	-2.58755	0.447192	0.888326	0.906769	-		-	GO:0048029//monosaccharide binding	-	COCehwD001960.1	CN01_14P008950
CN01_03P008290	CN01_03G008290	ABA	LTP,2S	LTP-2,103998349	20	La-	282	complete	ISS_1	IPR033872,IPR016140,IPR036312	non-specific lipid-transfer protein 2	Bifunctional inhibitor/lipid-transfer protein/seed storage 2S albumin superfamily protein	LOC_Os11g40530	0.4	0.97	0.82	1714.54	912.377	463.277	419.76	-0.910117	-1.88787	-2.03018	0.767875	0.878914	0.892741	-		GO:0031410//cytoplasmic vesicle	-	GO:0051234//establishment of localization;GO:0010876//lipid localization	COCehwD003457.1	CN01_03P008290
CN01_scaffold020479P000010	CN01_scaffold020479G000010	#N/A	#N/A	Smt1-1,SMT1,SMT2,SMT3,LOC103697536,LOC103717656	#N/A	La-	945	complete	ISS_2	IPR013216,IPR029063,IPR030384,IPR013705	Cycloartenol-C-24-methyltransferase 1	sterol methyltransferase 1	LOC_Os07g10600	0.71	0.92	0.84	1455.06	908.397	373.637	556.14	-0.679688	-1.96137	-1.38756	0.693754	0.883293	0.845974	K00559|1|2e-131|453|sbi:SORBI_09g029600|sterol 24-C-methyltransferase [EC:2.1.1.41]		-	GO:0008169//C-methyltransferase activity	GO:0006730//one-carbon metabolic process;GO:0008202//steroid metabolic process	COCehwD009186.1	CN01_U03P014340
CN01_09P003410	CN01_09G003410	#N/A	#N/A	COMT,OMT2,OMT1,LOC103706414,COMT2,LOC103696092,103978658	#N/A	La-	1104	complete	ISS_1	IPR016461,IPR036390,IPR012967,IPR001077,IPR036388,IPR029063	caffeic acid 3-O-methyltransferase	O-methyltransferase 1	LOC_Os08g06100	0.71	0.93	0.95	1042.27	903.24	368.983	326.465	-0.206543	-1.4981	-1.67472	0.344818	0.850253	0.874406	K05279|1|2e-153|540|zma:100125646|flavonol 3-O-methyltransferase [EC:2.1.1.76]		-	GO:0005515//protein binding;GO:0008171//O-methyltransferase activity	GO:0006730//one-carbon metabolic process;GO:0009699//phenylpropanoid biosynthetic process	COCehwD022769.1	CN01_09P003410
CN01_03P014460	CN01_03G014460	#N/A	#N/A	APS1,VSPA,VSPB,VSP25,LOC103713436,RCOM_1487980,BVC80_1791g25,VIT_09s0002g03220	#N/A	La-	789	complete	ISS_1	IPR036412,IPR014403,IPR010028,IPR023214,IPR005519	acid phosphatase 1	HAD superfamily, subfamily IIIB acid phosphatase	LOC_Os05g10210	0.56	0.81	0.8	488.42	697.32	86.2333	58.85	0.513699	-2.5018	-3.05301	0.604754	0.89904	0.911681	K02866|1|9e-19|92.0|osa:4332737|large subunit ribosomal protein L10e		-	-	-	COCehwD015916.1	CN01_03P014460
CN01_09P007380	CN01_09G007380	#N/A	#N/A	CAT2,CATA,CAT3,LOC103708648,103978257,Cat2	#N/A	La-	1467	complete	ISS_1	IPR018028,IPR002226,IPR037060,IPR011614,IPR020835,IPR010582,IPR024708,IPR024711	catalase isozyme 2	catalase 2	LOC_Os02g02400	0.85	1	0.99	591.37	657.383	179.45	208.64	0.152674	-1.72048	-1.50305	0.270213	0.86951	0.853348	K03781|1|0.0|910|osa:4328073|catalase [EC:1.11.1.6]		GO:0005777//peroxisome	GO:0005506//iron ion binding;GO:0004601//peroxidase activity	GO:0042743//hydrogen peroxide metabolic process;GO:0006950//response to stress	COCehwD021855.1	CN01_09P007380
CN01_03P016920	CN01_03G016920	#N/A	#N/A	GI,NSF,SMXL7,LOC103709749,LOC103704831,4325329,100147733	#N/A	La-	2790	complete	ISS_2	IPR026211	Gigantea1	gigantea protein (GI)	LOC_Os01g08700	0.79	1	0.79	375.577	597.827	136.817	143.605	0.67062	-1.45686	-1.387	0.688056	0.841752	0.842407	K12124|1|0.0|1242|osa:4325329|GIGANTEA		-	-	-	COCehwD009800.1	CN01_03P016920
CN01_16P007570	CN01_16G007570	#N/A	#N/A	RPS15A,RPS15AA,RPS15AD,PHAVU_003G132300g,103984251,CDL12_02878	#N/A	La-	393	complete	ISS_1	IPR000630,IPR035987	40S ribosomal protein S15a	ribosomal protein S15A	LOC_Os02g27760	0.96	0.99	0.99	408.657	574.203	155.807	150.595	0.490672	-1.39113	-1.44022	0.590552	0.836008	0.84757	K02957|1|1e-69|259|vvi:100258124|small subunit ribosomal protein S15Ae		GO:0031090//organelle membrane;GO:0043231//intracellular membrane-bounded organelle;GO:0015935//small ribosomal subunit;GO:0030312//external encapsulating structure	GO:0005198//structural molecule activity	GO:0010467//gene expression	COCehwD005709.1	CN01_16P007570
CN01_06P012990	CN01_06G012990	#N/A	#N/A	TRX1,TRX5,103982994,LOC103712019,ACMD2_09380	#N/A	La-	429	complete	ISS_2	IPR005746,IPR017937,IPR013766,IPR036249	thioredoxin H1	thioredoxin H-type 9	LOC_Os05g07690	0.43	0.95	0.93	804.473	566.153	349.85	317.24	-0.506852	-1.20131	-1.34247	0.605016	0.814593	0.839633	K03671|1|2e-45|179|gmx:100127412|thioredoxin 1		GO:0044444//cytoplasmic part	GO:0015036//disulfide oxidoreductase activity;GO:0030234//enzyme regulator activity	GO:0018904;GO:0019725//cellular homeostasis;GO:0044093	COCehwD004123.2	CN01_06P012990
CN01_03P008280	CN01_03G008280	ABA	LTP,2S	LTP-2,LOC103701870	20	La-	282	complete	ISS_1	IPR036312,IPR016140,IPR033872	Type 2 nonspecific lipid transfer protein LTP203	Bifunctional inhibitor/lipid-transfer protein/seed storage 2S albumin superfamily protein	LOC_Os03g02050	0.4	0.98	0.95	567.177	541.607	240.54	261.54	-0.0665527	-1.23752	-1.11677	0.162687	0.820047	0.809397	-		-	GO:0005488//binding	GO:0010876//lipid localization	COCehwD003458.1	CN01_03P008280
CN01_scaffold007449P000030	CN01_scaffold007449G000030	#N/A	#N/A	PI21,HIPP06,LOC103707577,ACMD2_07370,LOC103707576	#N/A	La-	738	missing_functional_completeness	ISS_4	#N/A	conserved hypothetical protein	Heavy metal transport/detoxification superfamily protein	LOC_Os03g54050	0.61	0.22	0.24	461.64	525.78	33.4767	32.22	0.187691	-3.78554	-3.84074	0.321842	0.912926	0.916938	-		-	-	-	COCehwD024730.1	CN01_U02P019020
CN01_scaffold019103P000050	CN01_scaffold019103G000050	#N/A	#N/A	CTL1,CTL2,LOC103712028,CHI1,LOC103711921,EaCHI1	#N/A	La-	915	complete	ISS_1	IPR000726,IPR023346,IPR016283	chitinase-like protein 1	Chitinase family protein	LOC_Os09g32080	0.76	0.97	0.91	508.21	419.503	171.93	126.91	-0.276742	-1.5636	-2.00162	0.416981	0.854404	0.889226	K01183|1|1e-53|207|ath:AT3G12500|chitinase [EC:3.2.1.14]		GO:0031410//cytoplasmic vesicle	GO:0004553//hydrolase activity, hydrolyzing O-glycosyl compounds	GO:0010035//response to inorganic substance;GO:0016049//cell growth;GO:0009725//response to hormone stimulus;GO:0006026;GO:0009913//epidermal cell differentiation;GO:0009696//salicylic acid metabolic process;GO:0006970//response to osmotic stress;GO:0009699//phenylpropanoid biosynthetic process;GO:0006109//regulation of carbohydrate metabolic process	COCehwD008367.1	CN01_U03P000090
CN01_scaffold002540P000010	CN01_scaffold002540G000010	#N/A	#N/A	GLX1,GLXI,RFNR1,At5g42350,LOC103708766,103975318,103986012	#N/A	La-	543	complete	ISS_4	IPR037523,IPR029068,IPR004360	conserved hypothetical protein	Lactoylglutathione lyase / glyoxalase I family protein	LOC_Os05g07940	0.68	0.97	0.93	322.417	412.287	104.103	55.32	0.354721	-1.63091	-2.54305	0.482659	0.859361	0.902952	K08234|1|7e-10|61.6|cre:CHLREDRAFT_143257|glyoxylase I family protein		-	GO:0003824//catalytic activity	-	COCehwD011907.1	CN01_U02P024170
CN01_12P000420	CN01_12G000420	#N/A	#N/A	RPP0A,Os08g0130500,RPP0B,LOC103713833,103984125,ACMD2_00664	#N/A	La-	963	complete	ISS_1	IPR040637,IPR001790,IPR030670	60S acidic ribosomal protein P0	Ribosomal protein L10 family protein	LOC_Os08g03640	0.82	1	1	294.18	375.727	122.547	126.095	0.352984	-1.26337	-1.22219	0.482232	0.819434	0.820015	K02941|1|1e-124|444|vvi:100250067|large subunit ribosomal protein LP0		GO:0030529//ribonucleoprotein complex	GO:0016829//lyase activity;GO:0005198//structural molecule activity	GO:0006412//translation	COCehwD013480.1	CN01_12P000420
CN01_01P015220	CN01_01G015220	#N/A	#N/A	AT4,AT5,AT9,AT7,LOC103713647,LOC103720057,103992855	#N/A	La-	1137	complete	ISS_1	IPR023213,IPR003480	acyl transferase 4-like	HXXXD-type acyl-transferase family protein	LOC_Os05g04584	0.62	1	0.9	353.553	355.913	52.27	42.865	0.00959812	-2.75787	-3.04406	0.0773842	0.902674	0.910628	K15400|1|1e-35|149|pop:POPTR_797957|omega-hydroxypalmitate O-feruloyl transferase [EC:2.3.1.188]		-	GO:0016740//transferase activity	-	COCehwD020760.1	CN01_01P015220
CN01_scaffold005094P000030	CN01_scaffold005094G000030	#N/A	#N/A	FAP1,FAP2,FAP3,UPS2,MANES_15G150400,JCGZ_10247,CHI	#N/A	La-	804	complete	ISS_2	IPR016088,IPR016089,IPR036298	fatty-acid-binding protein 1	Chalcone-flavanone isomerase family protein	LOC_Os06g10210	0.3	0.72	0.47	448.29	350.06	161.787	188.825	-0.35683	-1.47034	-1.24738	0.491495	0.843496	0.827315	-		-	GO:0016853//isomerase activity	GO:0006575//cellular modified amino acid metabolic process	COCehwD019858.1	CN01_U01P013030
CN01_02P012760	CN01_02G012760	#N/A	RNAseT2	RNALX,RNS3,RNS1,LOC103708556,103996749	#N/A	La-	537	fragment	ISS_3	IPR001568,IPR036430	putative Intracellular ribonuclease LX	ribonuclease 3	LOC_Os09g36680	0.35	0.87	0.6	260.853	329.833	35.42	14.33	0.338498	-2.8806	-4.18613	0.473086	0.902391	0.916938	K01166|1|4e-22|102|vvi:100249919|ribonuclease T2 [EC:3.1.27.1]		GO:0044464//cell part	GO:0016787//hydrolase activity	-	COCehwD009537.1	CN01_02P012760
CN01_16P002250	CN01_16G002250	#N/A	#N/A	ANN4,ANNAT8,ANN1,LOC103724050,LOC103698777,ACMD2_01661,103978567	#N/A	La-	933	complete	ISS_2	IPR018502,IPR001464,IPR037104	Annexin D4	annexin 4	LOC_Os05g31750	0.61	0.97	0.98	166.283	321.61	42.4933	26.175	0.951669	-1.96834	-2.66738	0.775676	0.873661	0.900021	-		-	GO:0005488//binding	-	COCehwD000979.1	CN01_16P002250
CN01_01P018670	CN01_01G018670	#N/A	#N/A	TPRP-F1,At4g12490,PRP2,AZI1,ARALYDRAFT_673168,At3g22142,GSCOC_T00022963001	#N/A	La-	1626	modules	ISS_3	IPR036312,IPR027923	putative Repetitive proline-rich cell wall protein 2	Bifunctional inhibitor/lipid-transfer protein/seed storage 2S albumin superfamily protein	LOC_Os06g07220	0.78	0.16	0.34	518.55	316.37	76.1733	59.17	-0.71287	-2.76713	-3.13155	0.70281	0.904073	0.91237	-		GO:0031410//cytoplasmic vesicle	-	-	COCehwD024495.2	CN01_01P018670
CN01_16P002240	CN01_16G002240	#N/A	#N/A	ANN3,ANN2,ANNAT7,ACMD2_01662	#N/A	La-	960	complete	ISS_1	IPR018502,IPR037104,IPR001464,IPR009118,IPR018252	annexin D3	annexin 3	LOC_Os05g31760	0.62	0.97	0.85	198.693	310.02	75.4	60.825	0.641818	-1.39791	-1.70781	0.670315	0.831761	0.868325	-		-	GO:0005488//binding	-	COCehwD000978.1	CN01_16P002240
CN01_scaffold000732P000090	CN01_scaffold000732G000090	#N/A	#N/A	KDSA,KDSA1,KDSA2,PURA,LOC103701596,A4U43_UnF2370,SOVF_137000,CQW23_26546	#N/A	La-	873	complete	ISS_1	IPR013785,IPR006269,IPR006218	2-dehydro-3-deoxyphosphooctonate aldolase	Aldolase-type TIM barrel family protein	LOC_Os12g10784	0.91	0.99	0.99	445.34	296.937	96.5967	121.02	-0.584752	-2.20486	-1.87966	0.643815	0.890105	0.882071	K01627|1|3e-146|515|mtr:MTR_7g081220|2-dehydro-3-deoxyphosphooctonate aldolase (KDO 8-P synthase) [EC:2.5.1.55]		GO:0044424//intracellular part	GO:0016765//transferase activity, transferring alkyl or aryl (other than methyl) groups	GO:0045489//pectin biosynthetic process;GO:0009103//lipopolysaccharide biosynthetic process	COCehwD024458.1	CN01_U02P000360
CN01_scaffold003431P000010	CN01_scaffold003431G000010	#N/A	#N/A	unknown_gene	#N/A	La-	156	missing_functional_completeness	ISS_5	#N/A	hypothetical protein	RNA methyltransferase family protein	LOC_Os01g09750	0.3	0.65	0.06	332.453	246.607	57.9767	31.44	-0.43094	-2.51961	-3.40248	0.546476	0.898123	0.913016	-		-	-	-	COCehwD015113.1	CN01_U02P008280
CN01_07P002270	CN01_07G002270	#N/A	#N/A	STR18,HAC1,STR17,STR16,LOC103706163,LOC103700882,STR19_1	#N/A	La-	390	complete	ISS_1	IPR001763,IPR036873	thiosulfate sulfurtransferase 18	sulfurtransferase 18	LOC_Os04g17660	0.57	0.98	0.86	271.01	240.543	85.3533	79.76	-0.172049	-1.66683	-1.76461	0.296742	0.862491	0.87379	-		-	-	GO:0032502//developmental process	COCehwD005038.1	CN01_07P002270
CN01_01P007600	CN01_01G007600	#N/A	#N/A	CTL1,CTL2,CHI-B,Chit1-1,LOC103701432,CHT	#N/A	La-	924	complete	ISS_1	IPR000726,IPR023346,IPR016283	chitinase-like protein 1	Chitinase family protein	LOC_Os09g32080	0.76	0.91	0.86	287.153	238.57	58.11	62.625	-0.267409	-2.30496	-2.19701	0.405261	0.891553	0.893096	K01183|1|5e-56|216|ath:AT3G12500|chitinase [EC:3.2.1.14]		-	-	-	COCehwD015684.1	CN01_01P007600
CN01_16P008480	CN01_16G008480	#N/A	#N/A	LECCVA1,LECCVA2,CUR09,LOC103696650,AXF42_Ash007905,lcl	#N/A	La-	813	complete	ISS_2	IPR036426,IPR001480	Mannose-specific lectin 1	S-locus lectin protein kinase family protein	LOC_Os09g37880	0.27	0.43	0.16	197.807	235.063	3.06333	9.365	0.248958	-6.01284	-4.40067	0.384107	0.945449	0.917449	-		-	-	-	COCehwD015489.1	CN01_16P008480
CN01_02P012770	CN01_02G012770	#N/A	RNAseT2	RNALX,RNS1,RNS3,LOC103708556,103996749	#N/A	La-	537	fragment	ISS_3	IPR036430,IPR001568	putative Intracellular ribonuclease LX	ribonuclease 3	LOC_Os09g36680	0.37	0.87	0.6	164.667	233.823	26.6367	8.925	0.50587	-2.62806	-4.20555	0.598808	0.894538	0.91311	K01166|1|1e-21|100|vvi:100249919|ribonuclease T2 [EC:3.1.27.1]		GO:0044464//cell part	GO:0016787//hydrolase activity	-	COCehwD009538.1	CN01_02P012770
CN01_01P006180	CN01_01G006180	#N/A	#N/A	FLA2,FLA1,FLA10,FLA8,LOC103712760,103975175,LOC103706551,LOC103721306	#N/A	La-	1239	complete	ISS_1	IPR000782,IPR033254,IPR036378	fasciclin-like arabinogalactan protein 2	FASCICLIN-like arabinogalactan 2	LOC_Os09g07350	0.62	0.8	0.81	172.973	224.7	48.89	24.735	0.37745	-1.82294	-2.80592	0.503442	0.866414	0.902555	-		-	-	-	COCehwD002299.1	CN01_01P006180
CN01_16P002760	CN01_16G002760	#N/A	#N/A	At5g12110,Os07g0662500,At5g19510,EF1B,LOC103711704,PHAVU_006G019800g	#N/A	La-	675	complete	ISS_1	IPR001326,IPR036282,IPR014038,IPR036219,IPR014717	elongation factor 1-beta-like	Glutathione S-transferase, C-terminal-like,Translation elongation factor EF1B/ribosomal protein S6	LOC_Os07g46750	0.67	1	1	380.283	219.72	109.127	127.285	-0.791409	-1.80107	-1.57901	0.729007	0.871703	0.861963	K03232|1|9e-62|234|osa:4344188|elongation factor 1-beta		-	-	-	COCehwD023973.1	CN01_16P002760
CN01_04P005170	CN01_04G005170	#N/A	#N/A	At5g15010,APY3,APY2,APY1,LOC103709108,MA16_Dca016029,BVC80_1321g47	#N/A	La-	2727	modules	ISS_3	IPR000407,IPR011990,IPR002885	putative Pentatricopeptide repeat-containing protein At5g15010, mitochondrial	Tetratricopeptide repeat (TPR)-like superfamily protein	LOC_Os01g60010	0.6	0.5	0.85	340.687	217.713	116.587	96.545	-0.646016	-1.54704	-1.81917	0.675496	0.851591	0.878421	K14641|1|3e-97|355|osa:4344315|apyrase [EC:3.6.1.5]		GO:0043231//intracellular membrane-bounded organelle	-	-	COCehwD006807.2	CN01_04P005170
CN01_01P010340	CN01_01G010340	#N/A	#N/A	LOC103706472,LOC103711468,ACMD2_07586,103972478	#N/A	La-	507	complete	ISS_1	#N/A	phosphopantothenoylcysteine decarboxylase subunit VHS3	#N/A	#N/A	#N/A	#N/A	#N/A	146.377	212.06	59.03	63.215	0.534787	-1.31017	-1.21135	0.609058	0.817441	0.810628	-		-	-	-	COCehwD015045.1	CN01_01P010340
CN01_08P001760	CN01_08G001760	#N/A	#N/A	CNR1,PCR3,PCR1,PCR2,LOC104604366,LOC103706196,PCR2_4,PCR2_0	#N/A	La-	231	fragment	ISS_3	IPR006461	putative Cell number regulator 1	PLAC8 family protein	LOC_Os02g36950	0.62	0.99	0.53	121.417	200.697	51.29	53.39	0.72505	-1.24322	-1.18533	0.703369	0.805251	0.804683	-		-	-	-	COCehwD020426.2	CN01_08P001760
CN01_04P000380	CN01_04G000380	#N/A	#N/A	Os01g0856500,LAX4,LAX2,AUX1,LOC103704038,LOC103711175,ACMD2_07107	#N/A	La-	1452	complete	ISS_1	IPR013057	auxin transporter-like protein 2	Transmembrane amino acid transporter family protein	LOC_Os01g63770	0.85	1	1	229.25	197.913	68.6033	91.81	-0.212053	-1.74057	-1.3202	0.341128	0.865601	0.830361	K13946|1|0.0|813|gmx:100778463|auxin influx carrier (AUX1 LAX family)		GO:0031224//intrinsic to membrane	GO:0015291//secondary active transmembrane transporter activity	GO:0015837//amine transport;GO:0009755//hormone-mediated signaling pathway	COCehwD004521.1	CN01_04P000380
CN01_05P002900	CN01_05G002900	ROS	PER,PPX	PER73,PER35,PER50,PER51,LOC103705279,LOC103709214,104000712,RCOM_0578390	32	La-	1128	complete	ISS_2	IPR019794,IPR019793,IPR002016,IPR010255,IPR033905,IPR000823	Peroxidase 73	Peroxidase superfamily protein	LOC_Os03g55420	0.67	0.86	0.99	210.55	191.163	89.8367	80.745	-0.139357	-1.22879	-1.38272	0.255756	0.811808	0.836368	K00430|1|2e-133|473|rcu:RCOM_0578390|peroxidase [EC:1.11.1.7]		GO:0031410//cytoplasmic vesicle	GO:0016209//antioxidant activity;GO:0005506//iron ion binding;GO:0003824//catalytic activity	GO:0006950//response to stress;GO:0008152//metabolic process	COCehwD010886.1	CN01_05P002900
CN01_04P004220	CN01_04G004220	ROS	PER,PPX	GSVIVT00023967001,PER52,PNC1,LOC103721948,A4U43_UnF8730,VIT_06s0004g07770,prx3	32	La-	966	complete	ISS_1	IPR019794,IPR019793,IPR033905,IPR002016,IPR010255,IPR000823	peroxidase 4	Peroxidase superfamily protein	LOC_Os11g02130	0.75	0.93	0.93	162.32	191.077	32.58	13.29	0.235311	-2.31678	-3.61043	0.371643	0.887271	0.909011	K00430|1|3e-127|452|vvi:100257005|peroxidase [EC:1.11.1.7]		-	GO:0005506//iron ion binding;GO:0003824//catalytic activity;GO:0016209//antioxidant activity	GO:0008152//metabolic process;GO:0006950//response to stress	COCehwD018574.1	CN01_04P004220
CN01_11P001380	CN01_11G001380	#N/A	#N/A	CESA3,CESA5,CESA6,LOC103711978,LOC103711912,LOC104603854,LOC104606922	#N/A	La-	3270	complete	ISS_1	IPR013083,IPR005150,IPR029044,IPR027934	Cellulose synthase	cellulose synthase 6	LOC_Os03g62090	0.87	1	1	240.507	189.137	83.94	68.875	-0.346648	-1.51865	-1.80402	0.479355	0.847302	0.874969	K10999|1|0.0|1911|vvi:100242715|cellulose synthase A [EC:2.4.1.12]		GO:0031224//intrinsic to membrane	GO:0016759//cellulose synthase activity;GO:0046914//transition metal ion binding	GO:0045229//external encapsulating structure organization;GO:0009250//glucan biosynthetic process	COCehwD017880.1	CN01_11P001380
CN01_07P001960	CN01_07G001960	#N/A	#N/A	PRP2,PRP4,LOC103706138,LOC103699283,103974686	#N/A	La-	1011	modules	ISS_3	#N/A	putative proline-rich protein 4	proline-rich protein 2	LOC_Os10g05750	0.38	0.68	0.82	191.113	180.173	49.53	23.17	-0.0850429	-1.94805	-3.0441	0.189808	0.874564	0.906383	-		-	-	-	COCehwD020207.1	CN01_07P001960
CN01_08P003710	CN01_08G003710	#N/A	#N/A	CP31B,CP31A,LOC103712353,BVC80_1065g109,LOC104593034,JCGZ_11382	#N/A	La-	558	fragment	ISS_3	IPR012677,IPR035979	putative RNA-binding protein CP31B, chloroplastic	chloroplast RNA-binding protein 29	LOC_Os07g43810	0.28	0.44	0.36	229.803	178.66	67.33	65.91	-0.363183	-1.77108	-1.80183	0.487653	0.866849	0.874499	-		GO:0009507//chloroplast	GO:0005488//binding	-	COCehwD013515.1	CN01_08P003710
CN01_10P005110	CN01_10G005110	#N/A	#N/A	LAC6,LAC22,LAC4,LAC12,LOC103707700,LOC103695452,AQUCO_03700220v1	#N/A	La-	1722	complete	ISS_1	IPR001117,IPR002355,IPR011707,IPR008972,IPR011706,IPR034289,IPR017761,IPR033138,IPR034288,IPR034285	laccase-6	laccase 17	LOC_Os03g16610	0.49	0.95	0.95	153.287	174.01	27.5733	23.335	0.182938	-2.47489	-2.71566	0.305936	0.890181	0.899635	K00423|1|4e-62|237|ppp:PHYPADRAFT_163787|L-ascorbate oxidase [EC:1.10.3.3]		-	-	-	COCehwD002356.1	CN01_10P005110
CN01_16P006100	CN01_16G006100	#N/A	#N/A	XA21,At5g37450,TPS4,LOC103717501,B456_002G266600,MANES_08G097000	#N/A	La-	366	complete	ISS_1	IPR014347,IPR001398	macrophage migration inhibitory factor	Tautomerase/MIF superfamily protein	LOC_Os11g01600	0.81	0.99	0.99	223.203	173.63	100.64	83.795	-0.362342	-1.14915	-1.41342	0.48737	0.801231	0.840624	K07253|1|3e-36|147|ppp:PHYPADRAFT_166244|phenylpyruvate tautomerase [EC:5.3.2.1];K15923|2|6e-34|140|mtr:MTR_4g127370|alpha-L-fucosidase 2 [EC:3.2.1.51]		GO:0009536//plastid	GO:0016862//intramolecular oxidoreductase activity, interconverting keto- and enol-groups	GO:0006952//defense response;GO:0009607//response to biotic stimulus	COCehwD008011.2	CN01_16P006100
CN01_05P000760	CN01_05G000760	#N/A	#N/A	SQE1,SQE3,SQE2,LOC103707523,ACMD2_16023,SORBI_3001G447600,ZEAMMB73_Zm00001d047998	#N/A	La-	1122	missing_functional_completeness	ISS_4	IPR013698,IPR036188,IPR040125	conserved hypothetical protein	FAD/NAD(P)-binding oxidoreductase family protein	LOC_Os03g12900	0.9	0.78	0.67	298.257	171.033	45.7933	58.05	-0.802277	-2.70334	-2.36119	0.730345	0.900674	0.898623	K00511|1|1e-147|520|sbi:SORBI_01g042050|squalene monooxygenase [EC:1.14.13.132]		GO:0031224//intrinsic to membrane;GO:0031410//cytoplasmic vesicle	GO:0004497//monooxygenase activity;GO:0050662//coenzyme binding	GO:0008152//metabolic process	COCehwD015314.1	CN01_05P000760
CN01_03P001480	CN01_03G001480	#N/A	#N/A	HSFA2C,HSFA2B,HSFA2E,HSFA2D,LOC103724134,LOC103724118,LOC100828307,4342550	#N/A	La-	846	fragment	ISS_3	IPR036390,IPR004986,IPR036388,IPR000232,IPR027725	putative Heat stress transcription factor A-2c	heat shock transcription factor A6B	LOC_Os10g28340	0.69	0.9	0.71	173.98	167.133	50.4167	58.245	-0.057922	-1.78695	-1.57872	0.144401	0.864849	0.855392	-		-	GO:0003677//DNA binding	GO:0006351//transcription, DNA-dependent	COCehwD028024.1	CN01_03P001480
CN01_14P011270	CN01_14G011270	#N/A	#N/A	SP1L1,SP1L2,SPR1,SP1L4,LOC103704485,LOC103718224	#N/A	La-	324	complete	ISS_2	IPR039613	Protein SPIRAL1-like 1	SPIRAL1-like2	LOC_Os12g31780	0.58	0.82	0.79	305.453	166.45	101.29	114.925	-0.875863	-1.59246	-1.41026	0.756204	0.856217	0.843346	-		-	-	-	COCehwD016715.1	CN01_14P011270
CN01_scaffold000918P000020	CN01_scaffold000918G000020	#N/A	#N/A	GLU1,GLU2,KOR,KOR3,LOC103716976,ACMD2_05723	#N/A	La-	1707	complete	ISS_1	IPR008928,IPR001701,IPR012341,IPR018221	Endoglucanase	glycosyl hydrolase 9A1	LOC_Os03g21210	0.78	0.92	0.84	137.597	158.87	37.99	35.855	0.207401	-1.85675	-1.9402	0.338396	0.864863	0.875302	K01179|1|0.0|856|sbi:SORBI_01g008860|endoglucanase [EC:3.2.1.4]		-	GO:0016798//hydrolase activity, acting on glycosyl bonds	GO:0044238//primary metabolic process	COCehwD027202.1	CN01_U01P007220
CN01_04P011320	CN01_04G011320	#N/A	#N/A	LACS1,LACS4,LACS5,LACS3,LOC103701019	#N/A	La-	2082	complete	ISS_1	IPR042099,IPR000873,IPR020845	long chain acyl-CoA synthetase 1	AMP-dependent synthetase and ligase family protein	LOC_Os05g04170	0.69	0.99	0.98	184.627	157.583	82.59	82.66	-0.228496	-1.16057	-1.15935	0.361213	0.800556	0.807436	K01897|1|0.0|990|bdi:100841530|long-chain acyl-CoA synthetase [EC:6.2.1.3]		GO:0043231//intracellular membrane-bounded organelle	GO:0015645//fatty acid ligase activity	GO:0006633//fatty acid biosynthetic process	COCehwD020097.1	CN01_04P011320
CN01_11P011710	CN01_11G011710	#N/A	#N/A	TBL19,TBL21,TBL20,TBL25,LOC103702447,ACMD2_19699,LOC104597796,POPTR_0004s10540g	#N/A	La-	1371	complete	ISS_1	IPR029962,IPR026057,IPR025846	protein trichome birefringence-like 19	TRICHOME BIREFRINGENCE-LIKE 19	LOC_Os01g46400	0.5	0.88	0.96	203.197	157.37	23.1133	30.195	-0.368716	-3.13608	-2.7505	0.494089	0.903549	0.903379	-		-	-	-	COCehwD016646.1	CN01_11P011710
CN01_02P013290	CN01_02G013290	#N/A	#N/A	KCR1,KCR2,HSD2,TR2,LOC103711599,LOC103720290,LOC108990665,EUGRSUZ_B03234	#N/A	La-	972	complete	ISS_1	IPR002347,IPR036291	very-long-chain 3-oxoacyl-CoA reductase 1	beta-ketoacyl reductase 1	LOC_Os02g38440	0.7	0.99	0.98	264.88	157.253	78.1567	77.16	-0.752248	-1.7609	-1.77941	0.714322	0.867559	0.874698	K10251|1|3e-138|489|pop:POPTR_821856|beta-keto reductase [EC:1.1.1.-]		-	GO:0033764//steroid dehydrogenase activity, acting on the CH-OH group of donors, NAD or NADP as acceptor	GO:0008152//metabolic process	COCehwD015534.1	CN01_02P013290
CN01_scaffold000793P000010	CN01_scaffold000793G000010	#N/A	#N/A	NBS1,rpoC2,Os03g0790900,LOC103695862,LOC103723102,g.41887,LOC103713298	#N/A	La-	606	complete	ISS_4	IPR008480	conserved hypothetical protein	#N/A	LOC_Os01g70500	0.42	0.96	0.97	212.397	155.76	80.8333	80.75	-0.447436	-1.39374	-1.39523	0.557733	0.831217	0.839132	-		-	-	-	COCehwD025499.1	CN01_U02P008090
CN01_04P003340	CN01_04G003340	#N/A	#N/A	AS,ASN1,LOC103718233,LOC103718138,LOC103709410	#N/A	La-	1476	complete	ISS_2	IPR014729,IPR029055,IPR001962,IPR017932,IPR006426	Asparagine synthetase [glutamine-hydrolyzing]	asparagine synthetase 3	LOC_Os06g15420	0.77	0.95	0.76	128.623	149.577	27.5567	18.855	0.217733	-2.22268	-2.77013	0.348418	0.880493	0.898509	K01953|1|0.0|790|vvi:100241610|asparagine synthase (glutamine-hydrolysing) [EC:6.3.5.4]		-	-	-	COCehwD020651.1	CN01_04P003340
CN01_03P015300	CN01_03G015300	#N/A	#N/A	Os01g0580200,BGAL1,LOC103718637,LOC103709584,MA16_Dca025309	#N/A	La-	2532	complete	ISS_2	IPR017853,IPR019801,IPR008979,IPR041392,IPR000922,IPR001944,IPR031330	Beta-galactosidase	beta galactosidase 1	LOC_Os01g39830	0.69	0.96	0.97	187.163	143.76	58.8933	37.575	-0.380636	-1.66812	-2.31645	0.501655	0.859078	0.893367	K12309|1|0.0|876|ath:AT3G52840|beta-galactosidase [EC:3.2.1.23];K01190|3|4e-48|191|cme:CMP078C|beta-galactosidase [EC:3.2.1.23]		GO:0005576//extracellular region;GO:0031410//cytoplasmic vesicle	GO:0030246//carbohydrate binding;GO:0043167//ion binding;GO:0015925	GO:0044238//primary metabolic process	COCehwD002822.1	CN01_03P015300
CN01_06P015970	CN01_06G015970	#N/A	#N/A	RALFL33,RALF1,RALFL14,RALF,AXF42_Ash011438,AXF42_Ash011437,MANES_05G064300	#N/A	La-	303	complete	ISS_3	IPR008801	putative protein RALF-like 33	ralf-like 33	LOC_Os01g15320	0.37	0.74	0.71	154.673	142.89	62.66	37.205	-0.11432	-1.30361	-2.05566	0.213791	0.816724	0.883198	-		-	-	-	COCehwD021956.1	CN01_06P015970
CN01_03P000470	CN01_03G000470	#N/A	#N/A	Os12g0624000,Os12g0623900,METE,MET,LOC103707070,LOC103719921,ACMD2_03389,LOC103698689	#N/A	La-	2415	complete	ISS_1	IPR006276,IPR002629,IPR038071,IPR013215	5-methyltetrahydropteroyltriglutamate--homocysteine methyltransferase 1	Cobalamin-independent synthase family protein	LOC_Os12g42884	0.88	0.95	1	124.19	132.15	43.9	40.265	0.0896274	-1.50026	-1.62495	0.188242	0.835464	0.854902	K00549|1|0.0|1357|bdi:100824461|5-methyltetrahydropteroyltriglutamate--homocysteine methyltransferase [EC:2.1.1.14]		-	GO:0046914//transition metal ion binding;GO:0008172	GO:0006730//one-carbon metabolic process;GO:0000097//sulfur amino acid biosynthetic process	COCehwD019060.1	CN01_03P000470
CN01_scaffold034468P000010	CN01_scaffold034468G000010	#N/A	#N/A	NPF4.3,NPF4.6,NPF4.4,NPF4.5,LOC103717521,NRT1.2_3,ACMD2_00758,BVC80_1713g48	#N/A	La-	1740	complete	ISS_1	IPR036259,IPR020846,IPR000109	protein NRT1/ PTR FAMILY 4.6	Major facilitator superfamily protein	LOC_Os04g41450	0.64	0.98	1	163.347	130.357	27.35	30.055	-0.325473	-2.57832	-2.44226	0.457049	0.893745	0.895275	K14638|1|2e-78|291|sbi:SORBI_01g009890|solute carrier family 15 (peptide/histidine transporter), member 3/4		-	-	-	COCehwD015157.2	CN01_U03P003050
CN01_10P008230	CN01_10G008230	#N/A	#N/A	ENO2,ENO1,PGH1,LOC103698430,LOC103708238	#N/A	La-	1338	complete	ISS_1	IPR020809,IPR000941,IPR020811,IPR020810,IPR036849,IPR029017	Enolase 2	Enolase	LOC_Os03g14450	0.92	1	0.99	172.783	128.533	69.5133	71.89	-0.426822	-1.3136	-1.2651	0.540372	0.819916	0.821256	K01689|1|0.0|821|bdi:100840157|enolase [EC:4.2.1.11]		GO:0043234//protein complex;GO:0044424//intracellular part	GO:0046872//metal ion binding;GO:0016836//hydro-lyase activity	GO:0006007//glucose catabolic process	COCehwD013853.1	CN01_10P008230
CN01_08P008810	CN01_08G008810	#N/A	#N/A	unknown_gene	#N/A	La-	213	missing_functional_completeness	ISS_5	#N/A	hypothetical protein	thiamin pyrophosphokinase1	LOC_Os01g70580	0.26	0.76	0.19	165.433	126.247	49.7667	48.42	-0.390005	-1.733	-1.77257	0.508319	0.861678	0.869712	-		-	-	-	COCehwD008676.1	CN01_08P008810
CN01_02P005040	CN01_02G005040	#N/A	GST,MAPEG	HAK21,LOC103700922,ACMD2_25293,LOC101764715	34	La-	447	complete	ISS_1	IPR001129,IPR023352	microsomal glutathione S-transferase 3	microsomal glutathione s-transferase, putative	LOC_Os03g50130	0.81	0.98	0.98	159.893	125.27	56.7533	49.665	-0.352069	-1.49433	-1.68681	0.475203	0.837498	0.864987	K00799|1|7e-69|256|osa:4333870|glutathione S-transferase [EC:2.5.1.18]		GO:0031410//cytoplasmic vesicle;GO:0043231//intracellular membrane-bounded organelle	GO:0016765//transferase activity, transferring alkyl or aryl (other than methyl) groups	-	COCehwD012500.1	CN01_02P005040
CN01_02P013170	CN01_02G013170	#N/A	G6PD	G6PDH,ACG12,ACG9,LOC103723314,LOC103708842,ACMD2_21140	#N/A	La-	1584	complete	ISS_1	IPR001282,IPR022674,IPR036291,IPR019796,IPR022675	glucose-6-phosphate 1-dehydrogenase, cytoplasmic isoform	glucose-6-phosphate dehydrogenase 6	LOC_Os02g38840	0.81	0.96	0.97	138.657	124.313	53.7467	34.66	-0.157536	-1.36727	-2.00017	0.280084	0.823529	0.87913	K00036|1|0.0|858|pop:POPTR_736146|glucose-6-phosphate 1-dehydrogenase [EC:1.1.1.49]		GO:0044444//cytoplasmic part	GO:0016616//oxidoreductase activity, acting on the CH-OH group of donors, NAD or NADP as acceptor;GO:0000166//nucleotide binding	GO:0006098//pentose-phosphate shunt	COCehwD004914.1	CN01_02P013170
CN01_10P004070	CN01_10G004070	ABA	LTP,2S	At4g12490,EARLI1,At4g12500,AZI1,LOC103705143,B456_004G200400,B456_004G199900,LOC107929370	20	La-	393	complete	ISS_1	IPR027923,IPR036312,IPR016140	14 kDa proline-rich protein DC2.15-like	Bifunctional inhibitor/lipid-transfer protein/seed storage 2S albumin superfamily protein	LOC_Os04g46820	0.62	0.98	0.98	235.303	121.453	41.96	39.12	-0.95412	-2.48744	-2.58854	0.773007	0.894924	0.901919	-		GO:0031410//cytoplasmic vesicle	-	GO:0010876//lipid localization	COCehwD023182.1	CN01_10P004070
CN01_06P020030	CN01_06G020030	#N/A	#N/A	ERD4,At4g02900,At3g21620,LOC103703675,103982944,LOC104588785,SPAC2G11.09_13	#N/A	La-	1578	fragment	ISS_3	IPR032880,IPR027815,IPR003864	putative CSC1-like protein ERD4	Early-responsive to dehydration stress protein (ERD4)	LOC_Os07g05570	0.7	0.98	0.75	178.437	115.847	70.06	79.11	-0.623196	-1.34875	-1.17348	0.656155	0.825528	0.808365	-		GO:0031410//cytoplasmic vesicle	-	-	COCehwD007626.1	CN01_06P020030
CN01_scaffold008698P000050	CN01_scaffold008698G000050	#N/A	#N/A	FLA6,FLA9,FLA11,FLA13,LOC103702460,LOC103713183,LOC103713251	#N/A	La-	765	complete	ISS_1	IPR036378,IPR000782	fasciclin-like arabinogalactan protein 12	FASCICLIN-like arabinogalactan-protein 11	LOC_Os01g47780	0.58	0.83	0.85	141.377	115.587	23.28	16.95	-0.290569	-2.60238	-3.06019	0.418595	0.892573	0.903108	-		GO:0031410//cytoplasmic vesicle	-	-	COCehwD026555.1	CN01_U02P005320
CN01_08P008390	CN01_08G008390	#N/A	#N/A	MARD1,At1g03100,ycf2-A,APUM13,LOC103714075,LOC103706359,108952585,LOC103704626	#N/A	La-	468	missing_functional_completeness	ISS_4	IPR007650	conserved hypothetical protein	Protein of unknown function (DUF581)	LOC_Os02g46180	0.44	0.48	0.51	139.223	111.39	55.7467	42.785	-0.321781	-1.32044	-1.70222	0.446095	0.818158	0.863559	-		-	-	-	COCehwD008634.1	CN01_08P008390
CN01_scaffold025167P000020	CN01_scaffold025167G000020	#N/A	#N/A	SAHH,SAHH1,LOC103710610,SAHH_2,LOC103717175,SAHH_8	#N/A	La-	1458	complete	ISS_1	IPR000043,IPR036291,IPR020082,IPR034373,IPR015878	Adenosylhomocysteinase	S-adenosyl-L-homocysteine hydrolase	LOC_Os11g26850	0.93	0.93	1	158.38	108.5	48.6833	60.095	-0.545695	-1.70189	-1.39807	0.61648	0.859168	0.83567	K01251|1|0.0|866|gmx:100815953|adenosylhomocysteinase [EC:3.3.1.1]		GO:0043231//intracellular membrane-bounded organelle;GO:0031090//organelle membrane	GO:0016802;GO:0046914//transition metal ion binding	GO:0010608//posttranscriptional regulation of gene expression;GO:0006342//chromatin silencing;GO:0003006//developmental process involved in reproduction	COCehwD011783.1	CN01_U02P010040
CN01_02P010790	CN01_02G010790	#N/A	#N/A	DIR19,DIR3,DIR20,DIR23,LOC103719964,103975093,LOC104587474,LOC104587473	#N/A	La-	576	complete	ISS_1	IPR004265	dirigent protein 19	Disease resistance-responsive (dirigent-like protein) family protein	LOC_Os11g07770	0.41	0.99	0.99	149.29	107.17	28.2033	24.625	-0.478216	-2.40418	-2.59992	0.57119	0.888705	0.897445	-		-	-	-	COCehwD023017.1	CN01_02P010790
CN01_06P014220	CN01_06G014220	#N/A	#N/A	TUBA3,TUBA1,TUBA6,TUBA5,LOC103723819,LOC103717644,ACMD2_23615	#N/A	La-	1353	complete	ISS_1	IPR000217,IPR018316,IPR017975,IPR003008,IPR002452,IPR037103,IPR008280,IPR013838,IPR023123,IPR036525	Tubulin alpha-3 chain	tubulin alpha-5	LOC_Os07g38730	0.98	1	1	218.7	104.69	89.74	88.26	-1.06283	-1.28513	-1.30912	0.798887	0.819909	0.828682	K07374|1|0.0|798|vvi:100260286|tubulin alpha		GO:0043234//protein complex;GO:0015630//microtubule cytoskeleton;GO:0030312//external encapsulating structure;GO:0044444//cytoplasmic part	GO:0017111//nucleoside-triphosphatase activity;GO:0032561//guanyl ribonucleotide binding	GO:0010038//response to metal ion;GO:0043623//cellular protein complex assembly;GO:0009207;GO:0007017//microtubule-based process	COCehwD025785.1	CN01_06P014220
CN01_01P001560	CN01_01G001560	#N/A	#N/A	RALFL33,RALF1,RALF,RALF23,LOC103695908,LOC103715094,103993666,103971781	#N/A	La-	366	complete	ISS_1	IPR008801	protein RALF-like 33	ralf-like 33	LOC_Os01g25560	0.56	0.76	0.78	125.117	104.55	19.6733	26.61	-0.259081	-2.66896	-2.23323	0.387631	0.89209	0.885232	-		GO:0005576//extracellular region;GO:0005618//cell wall	-	GO:0007154//cell communication;GO:0023052//signaling	COCehwD012396.1	CN01_01P001560
CN01_10P006090	CN01_10G006090	#N/A	#N/A	BEL1,BLH4,BLH2,BLH6,LOC103719661,LOC103702686,LOC103712213,LOC103710692	#N/A	La-	1806	complete	ISS_1	IPR001356,IPR008422,IPR009057,IPR006563	homeobox protein BEL1	POX (plant homeobox) family protein	LOC_Os03g03260	0.43	0.94	0.95	172.007	92.1367	57.5933	67.89	-0.900617	-1.57849	-1.34119	0.754266	0.849839	0.830111	-		-	-	-	COCehwD027521.1	CN01_10P006090
CN01_scaffold030843P000020	CN01_scaffold030843G000020	ABA	LEA-14,YLS9,NHL10	NHL1,NHL12,NHL26,NHL10,LOC103714280,LOC103703140,LOC103699391,103995514	#N/A	La-	654	complete	ISS_1	IPR004864	NDR1/HIN1-like protein 1	Late embryogenesis abundant (LEA) hydroxyproline-rich glycoprotein family	LOC_Os11g05860	0.54	0.95	0.98	139.72	90.22	32.6	28.95	-0.631019	-2.09959	-2.2709	0.655486	0.878783	0.888725	-		-	-	-	COCehwD013981.1	CN01_U03P010080
CN01_scaffold000561P000020	CN01_scaffold000561G000020	#N/A	#N/A	GLT1,Os01g0681900,Os05g0555600,LOC103713334,LOC103708325,B456_008G269600,LOC104604004	#N/A	La-	6315	complete	ISS_1	IPR002489,IPR013785,IPR029055,IPR009051,IPR036485,IPR002932,IPR028261,IPR036188,IPR006005,IPR023753,IPR017932,IPR006982,IPR012220	glutamate synthase 1 [NADH], chloroplastic	NADH-dependent glutamate synthase 1	LOC_Os05g48200	0.8	1	0.96	162.9	84.8433	57.3733	61.46	-0.941113	-1.50553	-1.40627	0.766171	0.842338	0.837151	K00264|1|0.0|3596|rcu:RCOM_1579610|glutamate synthase (NADPH/NADH) [EC:1.4.1.13 1.4.1.14]		-	-	-	COCehwD021136.1	CN01_U02P019270
CN01_scaffold006962P000010	CN01_scaffold006962G000010	#N/A	#N/A	CYP75A1,CYP75A3,CYP75A5,CYP75A2,LOC103706219,LOC103713287,CFOL_v3_05655,POPTR_0009s07320g	#N/A	La-	1509	complete	ISS_1	IPR001128,IPR002401,IPR017972,IPR036396	flavonoid 3',5'-hydroxylase 1	Cytochrome P450 superfamily protein	LOC_Os10g17260	0.46	0.95	0.93	114.577	81.7567	24.7267	18.365	-0.486905	-2.21217	-2.64128	0.573618	0.878239	0.894472	K13083|1|0.0|666|pop:POPTR_54623|cytochrome P450, family 75, subfamily A (flavonoid 3',5'-hydroxylase) [EC:1.14.13.88]		-	GO:0016491//oxidoreductase activity;GO:0005506//iron ion binding	GO:0008152//metabolic process	COCehwD023725.1	CN01_U01P012930
CN01_02P003640	CN01_02G003640	ABA	LEA-14	COV1,LCV1,LCV3,LCV2,LOC103713983,LOC103710911,103987774,103968920	#N/A	La-	1428	missing_functional_completeness	ISS_4	IPR007462,IPR004864	conserved hypothetical protein	#N/A	LOC_Os06g06780	0.72	0.6	0.91	101.147	81.3567	40.9833	40.73	-0.314116	-1.30334	-1.31229	0.43101	0.808443	0.816302	K03100|1|2e-07|55.8|osa:4328965|signal peptidase I [EC:3.4.21.89]		-	-	-	COCehwD026325.1	CN01_02P003640
CN01_14P011080	CN01_14G011080	#N/A	#N/A	UGT83A1,UGT85K4,UGT85K5,UGT85A8,LOC103697998,ACMD2_06179,LOC103709244,ACMD2_16285	#N/A	La-	1422	complete	ISS_2	IPR002213	UDP-glycosyltransferase 83A1-like	UDP-Glycosyltransferase superfamily protein	LOC_Os03g55050	0.46	0.97	1	109.833	75.72	32.4	21.595	-0.53657	-1.76125	-2.34655	0.602485	0.856513	0.887411	K13692|1|1e-65|248|vvi:100252177|UDP-glucose:(indol-3-yl)acetate beta-D-glucosyltransferase [EC:2.4.1.121];K13030|2|4e-62|237|sbi:SORBI_01g001220|cyanohydrin beta-glucosyltransferase [EC:2.4.1.85];K13068|3|1e-61|235|aly:ARALYDRAFT_479675|sinapate 1-glucosyltransferase [EC:2.4.1.120];K13691|5|1e-60|232|pop:POPTR_807713|pathogen-inducible salicylic acid glucosyltransferase [EC:2.4.1.-]		-	GO:0016757//transferase activity, transferring glycosyl groups	-	COCehwD016734.1	CN01_14P011080
CN01_08P000800	CN01_08G000800	#N/A	#N/A	KCS11,KCS2,KCS20,KCS9,LOC103711618,LOC107864657,T459_07874,BC332_06834	#N/A	La-	1416	complete	ISS_1	IPR012392,IPR016039,IPR013601,IPR013747	3-ketoacyl-CoA synthase 11	3-ketoacyl-CoA synthase 11	LOC_Os02g11070	0.73	1	0.91	110.383	73.39	42.0433	43.79	-0.588867	-1.39257	-1.33385	0.631503	0.821116	0.821058	K15397|1|0.0|784|vvi:100263066|3-ketoacyl-CoA synthase [EC:2.3.1.-]		GO:0044464//cell part	GO:0016747//transferase activity, transferring acyl groups other than amino-acyl groups	GO:0006631//fatty acid metabolic process	COCehwD011535.1	CN01_08P000800
CN01_02P000040	CN01_02G000040	#N/A	#N/A	CSE,At1g64760,BDG2,At4g24160,LOC103704079,LOC103708836,103986016,Mgll_5	#N/A	La-	1026	complete	ISS_1	IPR022742,IPR029058,IPR000073	caffeoylshikimate esterase	lysophospholipase 2	LOC_Os02g11720	0.68	0.93	0.92	103.74	72.8367	38.7567	30.45	-0.510235	-1.42046	-1.76846	0.584634	0.823377	0.862025	-		GO:0016020//membrane	-	GO:0000302//response to reactive oxygen species;GO:0010038//response to metal ion	COCehwD026194.1	CN01_02P000040
CN01_03P002170	CN01_03G002170	#N/A	#N/A	Os03g0165400,BGAL3,BGAL5,LOC103720984,AXF42_Ash013033,MA16_Dca025517,PaGAL4	#N/A	La-	2277	complete	ISS_2	IPR001944,IPR008979,IPR041392,IPR017853,IPR031330	Beta-galactosidase 5	beta-galactosidase 3	LOC_Os03g06940	0.72	0.89	0.89	123.477	72.83	31.6667	24.37	-0.761634	-1.9632	-2.34106	0.705417	0.869241	0.889028	K12309|1|0.0|802|ath:AT3G52840|beta-galactosidase [EC:3.2.1.23];K01190|3|1e-55|216|cme:CMP078C|beta-galactosidase [EC:3.2.1.23]		GO:0031410//cytoplasmic vesicle	GO:0030246//carbohydrate binding;GO:0043167//ion binding;GO:0015925	GO:0044238//primary metabolic process	COCehwD002545.2	CN01_03P002170
CN01_scaffold032126P000050	CN01_scaffold032126G000050	#N/A	#N/A	RPT1,RPT1A,RPT1B	#N/A	La-	219	fragment	ISS_3	IPR041569,IPR027417	putative 26S proteasome regulatory subunit 7	regulatory particle triple-A 1A	LOC_Os06g09290	0.99	0.99	0.17	142.563	68.4167	48.64	64	-1.05918	-1.55139	-1.15546	0.792762	0.843138	0.803504	K03061|1|2e-36|148|pop:POPTR_739967|26S proteasome regulatory subunit T1		-	-	-	COCehwD014402.1	CN01_U03P003040
CN01_11P006480	CN01_11G006480	#N/A	#N/A	At5g10770,AED1,ASPG1,APF2,LOC103711981,LOC103718454,ACMD2_10896,BAE44_0019819	#N/A	La-	1038	fragment	ISS_3	IPR001461,IPR032861,IPR033121,IPR001969,IPR021109,IPR032799	putative Aspartyl protease family protein At5g10770	Eukaryotic aspartyl protease family protein	LOC_Os02g48900	0.7	0.99	0.74	131.56	64	52.2167	59.02	-1.03958	-1.33314	-1.15645	0.787485	0.818758	0.802044	K00924|1|2e-28|124|ath:AT5G22850|[EC:2.7.1.-];K08245|3|8e-06|49.7|mtr:MTR_7g111530|phytepsin [EC:3.4.23.40]		-	-	-	COCehwD004250.2	CN01_11P006480
CN01_12P006420	CN01_12G006420	ROS	PER,PPX	GSVIVT00023967001,PER52,PER68,LOC108511375,LOC103721948,A4U43_UnF8730,prx3	#N/A	La-	945	complete	ISS_1	IPR033905,IPR002016,IPR010255,IPR000823,IPR019794,IPR019793	peroxidase 4	Peroxidase superfamily protein	LOC_Os11g02130	0.69	0.96	0.93	100.567	61.87	31.1467	33.95	-0.70084	-1.691	-1.56667	0.677634	0.850453	0.844149	K00430|1|4e-129|459|vvi:100257005|peroxidase [EC:1.11.1.7]		-	GO:0005506//iron ion binding;GO:0003824//catalytic activity;GO:0016209//antioxidant activity	GO:0008152//metabolic process;GO:0006950//response to stress	COCehwD015574.1	CN01_12P006420
CN01_08P009640	CN01_08G009640	#N/A	#N/A	KIN5C,LOC103716661,LOC103722242	#N/A	La-	822	modules	ISS_3	IPR025520	putative chromosome alignment-maintaining phosphoprotein 1-like	Protein of unknown function (DUF761)	LOC_Os04g57970	0.36	0.85	0.86	107.8	56.16	40.52	45.435	-0.940742	-1.41165	-1.24648	0.757356	0.823081	0.81092	-		-	-	-	COCehwD008295.1	CN01_08P009640
CN01_11P004210	CN01_11G004210	#N/A	#N/A	AP1,FD2,SEND33,LOC103713909,LOC103702636,103983643,JCGZ_04972	#N/A	Ea-La+	453	complete	ISS_2	IPR010241,IPR001041,IPR036010,IPR012675	Ferredoxin, chloroplastic	2Fe-2S ferredoxin-like superfamily protein	LOC_Os08g01380	0.57	0.96	0.98	3080.51	1380.54	7659.02	7880.16	-1.15793	1.31399	1.35506	0.826988	0.831244	0.843294	K02639|1|3e-49|191|vvi:100249080|ferredoxin		GO:0009536//plastid	GO:0051536//iron-sulfur cluster binding;GO:0043169//cation binding	GO:0051234//establishment of localization;GO:0006091//generation of precursor metabolites and energy	COCehwD016808.1	CN01_11P004210
CN01_14P004830	CN01_14G004830	#N/A	#N/A	GOLS1,GOLS4,GOLS2,LOC103715004,LOC103723459,GolS4,L484_027758	#N/A	Ea-La+	864	complete	ISS_2	IPR029044,IPR030515,IPR002495	Galactinol synthase 1	galactinol synthase 1	LOC_Os03g20120	0.58	0.91	0.93	1054.51	288.037	3632.35	5380.85	-1.87225	1.78433	2.35126	0.8883	0.874688	0.903056	K00750|1|3e-12|70.5|rcu:RCOM_0138290|glycogenin glucosyltransferase [EC:2.4.1.186]		-	GO:0016757//transferase activity, transferring glycosyl groups	-	COCehwD004764.1	CN01_14P004830
CN01_08P007820	CN01_08G007820	#N/A	#N/A	LHY,CCA1,LOC103722574,LOC103706413	#N/A	Ea-La+	1890	complete	ISS_2	#N/A	protein LHY-like	Homeodomain-like superfamily protein	LOC_Os08g06110	0.42	0.98	0.82	412.797	89.1333	988.54	1047.55	-2.21139	1.25987	1.34351	0.89924	0.824184	0.840217	K12133|1|1e-36|153|ath:AT1G01060|LATE ELONGATED HYPOCOTYL;K12134|3|3e-27|121|ath:AT2G46830|circadian clock associated 1		-	-	-	COCehwD008577.1	CN01_08P007820
CN01_03P011310	CN01_03G011310	#N/A	#N/A	At5g39865,At3g28850,GRXC12,GRXS12,LOC103702504,104001019,MA16_Dca022878	#N/A	Ea-La+	1110	complete	ISS_2	IPR002109,IPR036249	drebrin-like	Glutaredoxin family protein	LOC_Os01g13480	0.51	1	1	184.303	60.5067	496.12	641.2	-1.60692	1.42861	1.79869	0.864448	0.841145	0.879933	-		-	-	-	COCehwD024025.1	CN01_03P011310
CN01_scaffold009298P000030	CN01_scaffold009298G000030	#N/A	#N/A	FRO6,FRO7,FRO5,FRO4,LOC103715667,FRO7_6,ACMD2_11899	#N/A	Ea-La+	1404	fragment	ISS_3	IPR039261,IPR013112,IPR013121,IPR017938,IPR017927	putative Ferric reduction oxidase 6	ferric reduction oxidase 7	LOC_Os04g36720	0.62	0.9	0.57	153.713	56.2367	450.82	500.175	-1.45066	1.55231	1.70219	0.84766	0.853176	0.874228	K13447|1|2e-20|99.0|ppp:PHYPADRAFT_206166|respiratory burst oxidase [EC:1.6.3.- 1.11.1.-]		GO:0016020//membrane	GO:0046914//transition metal ion binding;GO:0003824//catalytic activity	-	COCehwD027303.1	CN01_U01P009340
CN01_07P002590	CN01_07G002590	#N/A	#N/A	UBC28,UBC8,UBC9,LOC103724129,CFP56_35899,F383_11445,B456_008G036200	#N/A	Ea-La+	447	complete	ISS_1	IPR023313,IPR000608,IPR016135	Ubiquitin-conjugating enzyme E2-17 kDa	ubiquitin-conjugating enzyme 28	LOC_Os02g02830	0.91	0.99	0.99	124.577	36.64	400.283	523.91	-1.76554	1.68399	2.07229	0.87018	0.865808	0.892689	K06689|1|2e-79|292|sbi:SORBI_10g020030|ubiquitin-conjugating enzyme E2 D/E [EC:6.3.2.19]		GO:0016020//membrane	GO:0019787//small conjugating protein ligase activity;GO:0032559	GO:0019941//modification-dependent protein catabolic process;GO:0032446//protein modification by small protein conjugation	COCehwD005006.1	CN01_07P002590
CN01_06P007090	CN01_06G007090	#N/A	#N/A	GOLS1,GOLS4,GOLS2,LOC103723459,LOC103715004,GolS4,LOC104593178	#N/A	Ea-La+	855	complete	ISS_2	IPR002495,IPR029044,IPR030515	Galactinol synthase 1	galactinol synthase 1	LOC_Os03g20120	0.74	0.99	0.84	125.75	20.99	534.27	727.205	-2.58278	2.08701	2.5318	0.897902	0.888126	0.905486	K00750|1|2e-09|61.2|rcu:RCOM_0138290|glycogenin glucosyltransferase [EC:2.4.1.186]		-	GO:0035250//UDP-galactosyltransferase activity	GO:0005975//carbohydrate metabolic process	COCehwD019977.2	CN01_06P007090
CN01_16P002140	CN01_16G002140	#N/A	#N/A	FHY,At2g33255,SOQ1,SGPP,LOC103701642,103976146,AXF42_Ash009198,PRUPE_7G041200	#N/A	Ea-La+	921	complete	ISS_1	IPR023214,IPR006439,IPR036412,IPR011949,IPR041492	haloacid dehalogenase-like hydrolase domain-containing protein 3	Haloacid dehalogenase-like hydrolase (HAD) superfamily protein	LOC_Os07g46520	0.84	0.74	0.8	157.107	15.4167	437.15	588.67	-3.34918	1.47638	1.90571	0.909179	0.844131	0.883803	K01097|1|6e-13|73.2|ppp:PHYPADRAFT_170201|N-acylneuraminate-9-phosphatase [EC:3.1.3.29]		-	-	-	COCehwD017725.1	CN01_16P002140
CN01_scaffold102648P000010	CN01_scaffold102648G000010	#N/A	HAK,KAT,AKT?	WNK4,WNK8,WNK7,WNK5,LOC103708883,LOC103713425,103982015	#N/A	La+	549	fragment	ISS_3	#N/A	putative serine/threonine-protein kinase WNK4	translocon at the inner envelope membrane of chloroplasts 110	LOC_Os10g35010	0.23	0.63	0.17	72.8333	13.42	184.333	285.36	-2.44021	1.33965	1.97011	0.88332	0.825115	0.884376	-		-	GO:0016301//kinase activity	-	COCehwD001075.1	CN01_U03P015140
CN01_scaffold008284P000080	CN01_scaffold008284G000080	#N/A	CCT	GHD7,COL4,COL5,COL3,LOC103711661,LOC103697977,ACMD2_26344	#N/A	La+	693	complete	ISS_1	IPR010402	transcription factor GHD7	CONSTANS-like 4	LOC_Os07g15770	0.44	0.97	0.86	75.18	11.85	228.35	308.42	-2.66546	1.60283	2.03648	0.888969	0.854997	0.888851	K12135|1|9e-06|48.5|aly:ARALYDRAFT_488429|zinc finger protein CONSTANS		-	-	-	COCehwD026037.1	CN01_U02P001810
CN01_15P004040	CN01_15G004040	#N/A	#N/A	ndhT,DJA6,DJA8,DJA7A,LOC103704837,dnaJ_40,ACMD2_05953	#N/A	La+	669	complete	ISS_2	IPR036869,IPR001623,IPR018253	NAD(P)H-quinone oxidoreductase subunit T, chloroplastic	Chaperone DnaJ-domain superfamily protein	LOC_Os11g10990	0.57	0.18	0.14	37.3233	7.27	134.537	142.615	-2.36005	1.84985	1.93398	0.851488	0.864208	0.875407	K03686|1|5e-10|62.8|bdi:100841335|molecular chaperone DnaJ		-	-	-	COCehwD006280.1	CN01_15P004040
CN01_09P007640	CN01_09G007640	#N/A	#N/A	AAE3,4CLL1,4CLL7,4CL1,LOC103719417,LOC104596092,CFP56_18527,LOC104608710	#N/A	La+	1563	complete	ISS_1	IPR025110,IPR000873,IPR020845,IPR042099	oxalate--CoA ligase	AMP-dependent synthetase and ligase family protein	LOC_Os04g58710	0.73	0.98	0.98	25.8567	6.33667	77.2167	109.365	-2.02874	1.57838	2.08054	0.808647	0.833195	0.879255	K01904|1|5e-52|203|sbi:SORBI_01g016420|4-coumarate--CoA ligase [EC:6.2.1.12]		GO:0005576//extracellular region;GO:0009536//plastid	GO:0016405//CoA-ligase activity;GO:0032559	GO:0010038//response to metal ion	COCehwD021881.1	CN01_09P007640
CN01_01P014520	CN01_01G014520	#N/A	#N/A	FAD4,FAD4L2,FAD4L1,RDM16,LOC103720930,104000016,ACMD2_00634,TMEM189_1	#N/A	La+	885	complete	ISS_1	IPR019547	fatty acid desaturase 4, chloroplastic	fatty acid desaturase A	LOC_Os08g08850	0.5	0.96	0.93	57.9933	4.71	158.687	141.05	-3.62209	1.45222	1.28225	0.891294	0.833423	0.81893	K10704|1|7e-87|318|rcu:RCOM_0585700|ubiquitin-conjugating enzyme E2 variant		GO:0009536//plastid	GO:0016705//oxidoreductase activity, acting on paired donors, with incorporation or reduction of molecular oxygen	GO:0006633//fatty acid biosynthetic process;GO:0009628//response to abiotic stimulus;GO:0006650//glycerophospholipid metabolic process	COCehwD009040.1	CN01_01P014520
CN01_09P003420	CN01_09G003420	#N/A	#N/A	LHY,CCA1,RVE4,RVE8,LOC103706413,LOC103722574	#N/A	Ea-La+	2082	complete	ISS_2	#N/A	protein LHY	Homeodomain-like superfamily protein	LOC_Os08g06110	0.41	1	0.89	623.987	84.9467	1257.75	1363.45	-2.87689	1.01126	1.12768	0.912511	0.778624	0.812505	K12133|1|6e-41|167|ath:AT1G01060|LATE ELONGATED HYPOCOTYL;K12134|3|2e-29|129|ath:AT2G46830|circadian clock associated 1		-	-	-	COCehwD022768.1	CN01_09P003420
CN01_01P020060	CN01_01G020060	SOS	CNMPB,HAK,AKT,KAT,CNGKC,KIRC	Os05g0428700,AKT2,AKT1,LOC103702633,ACMD2_10504,MA16_Dca011775,Os05g0428700_1	60	Ea-La+	2568	complete	ISS_1	IPR000595,IPR020683,IPR021789,IPR005821,IPR002110,IPR014710,IPR003938,IPR018490,IPR036770	potassium channel AKT2	K+ transporter 1	LOC_Os01g45990	0.42	0.92	0.91	203.747	58.9267	373.587	480.925	-1.78978	0.874667	1.23904	0.877547	0.728526	0.825375	K05391|1|2e-15|83.2|pop:POPTR_835950|cyclic nucleotide gated channel, other eukaryote		-	-	-	COCehwD022145.1	CN01_01P020060
CN01_01P019540	CN01_01G019540	#N/A	#N/A	CAO,CAO_2,ACMD2_06098,CDL15_Pgr004458	#N/A	Ea-La+	2370	modules	ISS_3	IPR036922,IPR015881,IPR017941,IPR013626,IPR006634	putative Chlorophyllide a oxygenase, chloroplastic	Pheophorbide a oxygenase family protein with Rieske [2Fe-2S] domain	LOC_Os10g41780	0.76	0.69	0.98	189.843	55.7433	405.577	431.705	-1.76794	1.09517	1.18524	0.876057	0.797667	0.818544	K13600|1|0.0|855|vvi:100247245|chlorophyllide a oxygenase [EC:1.14.13.122]		-	GO:0016703;GO:0046914//transition metal ion binding;GO:0051536//iron-sulfur cluster binding	GO:0008152//metabolic process	COCehwD007535.1	CN01_01P019540
CN01_03P012350	CN01_03G012350	ABA	LEA-14,Why	LEA14-A,LEA14,At2g46140,LOC103710881,ACMD2_05374	14	Ea-La+	456	complete	ISS_1	IPR004864,IPR013990	late embryogenesis abundant protein Lea14-A	Late embryogenesis abundant protein	LOC_Os01g12580	0.7	0.99	0.99	181.65	55.12	285.19	470.86	-1.72051	0.650762	1.37414	0.872567	0.645603	0.840978	-		-	-	-	COCehwD013386.1	CN01_03P012350
CN01_11P011580	CN01_11G011580	ABA	ZF,B-box,COL,CCT	COL2,CO3,CO,COL1,LOC103702404,LOC103712738,LOC104600461,EUGRSUZ_I02094	4	Ea-La+	870	complete	ISS_1	IPR010402,IPR000315	zinc finger protein CONSTANS-LIKE 2	CONSTANS-like 2	LOC_Os09g06464	0.46	0.97	0.96	138.907	40.18	265.773	350.025	-1.78957	0.936081	1.33334	0.872863	0.751272	0.835179	K12135|1|4e-40|163|aly:ARALYDRAFT_488429|zinc finger protein CONSTANS;K12130|2|4e-08|57.0|rcu:RCOM_0969830|pseudo-response regulator 5;K12127|3|5e-08|56.6|smo:SELMODRAFT_438647|pseudo-response regulator 1;K03539|4|4e-07|53.5|bdi:100830772|ribonuclease P/MRP protein subunit RPP1 [EC:3.1.26.5];K12129|5|4e-07|53.5|osa:4332464|pseudo-response regulator 7		-	-	-	COCehwD016633.1	CN01_11P011580
CN01_scaffold042086P000010	CN01_scaffold042086G000010	#N/A	#N/A	DVR,BEN1,LOC103696815,At2g37660_5,LOC104612623,FSB_LOCUS57711	#N/A	Ea-La+	1683	missing_functional_completeness	ISS_4	IPR013857,IPR016040,IPR036291,IPR008979	conserved hypothetical protein	high chlorophyll fluorescence phenotype 173	LOC_Os02g04510	0.74	0.8	0.75	130.203	36.3833	239.1	278.18	-1.83942	0.876848	1.09525	0.874346	0.728016	0.802482	K15891|1|2e-06|52.4|ath:AT4G33360|farnesol dehydrogenase [EC:1.1.1.216]		GO:0009526//plastid envelope	-	GO:0006412//translation	COCehwD017661.1	CN01_U03P012440
CN01_02P019440	CN01_02G019440	#N/A	#N/A	ORP4B,ORP4C,ORP4A,ORP3B,CFP56_14300,LOC103713100,ACMD2_11110	#N/A	La+	1830	complete	ISS_2	IPR037239,IPR018494,IPR000648	Oxysterol-binding protein-related protein 4c	OSBP(oxysterol binding protein)-related protein 4B	LOC_Os08g40590	0.63	0.54	0.85	78.2967	33.8967	136.937	203.085	-1.20781	0.806486	1.37506	0.80455	0.700203	0.835878	-		-	-	-	COCehwD021575.1	CN01_02P019440
CN01_contig68834334P000010	CN01_contig68834334G000010	#N/A	#N/A	At5g49770,At2g28990,SD18,At2g23200,LOC103709718,LOC103709719,LOC103702185,ACMD2_04954	#N/A	La+	366	fragment	ISS_3	#N/A	putative leucine-rich repeat receptor-like protein kinase At5g49770	Leucine-rich repeat protein kinase family protein	LOC_Os03g21230	0.52	0.98	0.12	67.5133	28.54	76.8233	188.565	-1.24219	0.186372	1.48182	0.802218	0.28596	0.84418	-		-	GO:0016301//kinase activity	-	COCehwD000042.1	COCehwD000042.1
CN01_scaffold020585P000060	CN01_scaffold020585G000060	#N/A	#N/A	CAB7,LHCA2,LHCA6,LOC103715849,T459_24689,LOC103718326,ACMD2_15791	#N/A	La+	474	fragment	ISS_3	IPR001344,IPR022796,IPR023329	putative Chlorophyll a-b binding protein, chloroplastic	photosystem I light harvesting complex gene 2	LOC_Os07g38960	0.95	0.95	0.57	66.3267	28.1133	141.957	222.6	-1.23833	1.09779	1.74679	0.801542	0.78727	0.871673	K08908|1|7e-84|306|gmx:100784089|light-harvesting complex I chlorophyll a/b binding protein 2		GO:0009521;GO:0031224//intrinsic to membrane;GO:0009534//chloroplast thylakoid	GO:0046906//tetrapyrrole binding;GO:0043169//cation binding	GO:0006464//cellular protein modification process;GO:0006091//generation of precursor metabolites and energy	COCehwD009409.1	CN01_U01P011670
CN01_14P006440	CN01_14G006440	#N/A	#N/A	PMP22,LOC104605628,ACMD2_21278,AMTR_s00003p00254020,MANES_15G084600	#N/A	La+	1164	complete	ISS_2	IPR007248	Peroxisomal membrane protein 2	Peroxisomal membrane 22 kDa (Mpv17/PMP22) family protein	LOC_Os03g38730	0.83	0.59	0.64	61.59	25.6067	119.187	140.125	-1.26618	0.952455	1.18595	0.801984	0.741868	0.807478	K13348|1|3e-21|101|cme:CMS031C|protein Mpv17		GO:0031224//intrinsic to membrane;GO:0043231//intracellular membrane-bounded organelle	-	-	COCehwD011538.1	CN01_14P006440
CN01_03P004950	CN01_03G004950	#N/A	#N/A	HSP17.4B,HSP18.6,HSP17.9,SHSP-1,LOC103716960,ACMD2_24609,ACMD2_15291,103995187	#N/A	Ea-La+	468	complete	ISS_1	IPR031107,IPR002068,IPR008978	17.4 kDa class III heat shock protein	HSP20-like chaperones superfamily protein	LOC_Os02g54140	0.5	0.99	0.95	111.34	23.9833	157.477	288.235	-2.21487	0.500166	1.37227	0.886879	0.557475	0.838121	K13993|1|2e-13|72.8|gmx:100777239|HSP20 family protein		-	-	-	COCehwD007631.1	CN01_03P004950
CN01_01P013650	CN01_01G013650	ABA	ZF,RING-CH	XERICO,ATL18,RHA2B,ATL11,LOC103714698,LOC103716787,103999247,103977864	29	La+	450	complete	ISS_3	IPR001841,IPR013083,IPR011016	putative E3 ubiquitin-protein ligase XERICO	RING/U-box superfamily protein	LOC_Os08g38460	0.48	0.97	0.93	68.7133	15.19	84.2533	269.37	-2.17747	0.294144	1.97093	0.874008	0.383224	0.883928	K10601|1|4e-09|58.5|osa:4340826|E3 ubiquitin-protein ligase synoviolin [EC:6.3.2.19]		-	-	-	COCehwD001182.1	CN01_01P013650
CN01_contig69049976P000010	CN01_contig69049976G000010	#N/A	#N/A	AEE10,At4g23740,rpoC2,MANES_12G154600,LOC104606757,ACMD2_17323	#N/A	La+	156	fragment	ISS_4	#N/A	conserved hypothetical protein	ARM repeat superfamily protein	LOC_Os10g42510	0.34	0.8	0.03	56.95	14.1133	76.76	412.56	-2.01264	0.430659	2.85684	0.8604	0.493091	0.909209	-		-	-	-	COCehwD000094.1	COCehwD000094.1
CN01_07P008950	CN01_07G008950	#N/A	#N/A	BAM1,BAMY2,BAMY1,BAM3,LOC103695546,LOC108980942	#N/A	La+	1530	complete	ISS_2	IPR001554,IPR017853,IPR018238	Beta-amylase	beta-amylase 1	LOC_Os03g04770	0.635	0.87	0.74	54.96	9.83333	79.9367	170.59	-2.48263	0.540475	1.63408	0.874457	0.565507	0.860357	K01177|1|1e-113|408|gmx:100781448|beta-amylase [EC:3.2.1.2]		-	GO:0016798//hydrolase activity, acting on glycosyl bonds	GO:0005975//carbohydrate metabolic process	COCehwD013791.2	CN01_07P008950
CN01_scaffold007600P000070	CN01_scaffold007600G000070	#N/A	#N/A	HSP17.9-D,HSP17.9,SHSP-1,LOC103709606,LOC103720807,sHSP	#N/A	Ea-La+	435	complete	ISS_1	IPR002068,IPR008978,IPR031107	17.3 kDa class II heat shock protein	17.6 kDa class II heat shock protein	LOC_Os01g08860	0.65	0.99	0.93	181.657	8.08667	328.177	501.355	-4.48953	0.853258	1.46462	0.920133	0.722369	0.85001	K13993|1|1e-54|209|pop:POPTR_832078|HSP20 family protein		-	-	-	COCehwD025029.1	CN01_U02P008620
CN01_12P006340	CN01_12G006340	#N/A	STK,TYK	WNK5,WNK4,WNK9,WNK3,LOC103708883,LOC103713425,ACMD2_10010,WNK5_5	#N/A	La+	651	fragment	ISS_3	IPR000719,IPR011009,IPR008271	putative serine/threonine-protein kinase WNK5	with no lysine (K) kinase 3	LOC_Os05g01780	0.66	0.94	0.37	30.2167	6.37333	70.48	107.11	-2.24522	1.22187	1.82568	0.832202	0.785835	0.865624	K08867|1|2e-85|312|smo:SELMODRAFT_136322|WNK lysine deficient protein kinase [EC:2.7.11.1];K12132|3|5e-84|308|ath:AT3G04910|serine/threonine-protein kinase WNK1 [EC:2.7.11.1]		-	GO:0004702//receptor signaling protein serine/threonine kinase activity;GO:0032559	GO:0009648//photoperiodism;GO:0006464//cellular protein modification process	COCehwD026861.1	CN01_12P006340
CN01_01P005950	CN01_01G005950	ABA	ZF,B-box,COL,CCT	COL2,CO3,CO,COL1,LOC103712738,LOC103702404,LOC104600461,EUGRSUZ_I02094	4	Ea-La+	975	complete	ISS_1	IPR000315,IPR010402	zinc finger protein CONSTANS-LIKE 2	CONSTANS-like 2	LOC_Os09g06464	0.46	1	1	109.64	3.91	237.26	262.24	-4.80946	1.11369	1.25811	0.919098	0.795447	0.824677	K12135|1|4e-36|150|aly:ARALYDRAFT_488429|zinc finger protein CONSTANS		-	-	-	COCehwD025351.1	CN01_01P005950
CN01_15P004030	CN01_15G004030	#N/A	#N/A	ndhT,DJA6,DJA8,DJA7A,LOC103704837,ACMD2_05953,dnaJ_40	#N/A	La+	672	complete	ISS_2	IPR001623,IPR036869,IPR018253	NAD(P)H-quinone oxidoreductase subunit T, chloroplastic	DNAJ-like 20	LOC_Os01g01160	0.46	0.29	0.34	36.2833	0.873333	39.2367	131.885	-5.37663	0.112895	1.8619	0.895384	0.192943	0.87038	K03686|1|5e-10|62.8|bdi:100841335|molecular chaperone DnaJ		-	-	-	COCehwD006281.1	CN01_15P004030
CN01_scaffold008284P000010	CN01_scaffold008284G000010	#N/A	#N/A	DJA6,DNAJ1,LDJ2,LOC103717276,CICLE_v10020330mg,CISIN_1g014800mg,LOC104590934	#N/A	Ea-	1251	complete	ISS_1	IPR001623,IPR002939,IPR001305,IPR018253,IPR012724,IPR008971,IPR036869,IPR036410	chaperone protein dnaJ A6	DNAJ homologue 2	LOC_Os02g43930	0.79	1	1	3142.27	1346.79	2703.93	4544.61	-1.22228	-0.216749	0.532349	0.835072	0.332023	0.597956	K09503|1|6e-171|598|sbi:SORBI_04g032970|DnaJ homolog subfamily A member 2		GO:0044424//intracellular part	GO:0043169//cation binding;GO:0005515//protein binding;GO:0008168//methyltransferase activity;GO:0032559	GO:0006950//response to stress;GO:0006730//one-carbon metabolic process;GO:0044267//cellular protein metabolic process	COCehwD026030.1	CN01_U02P001740
CN01_08P005680	CN01_08G005680	#N/A	#N/A	CDI,ILL2,At1g02770,LOC103720738,LOC103719892,MA16_Dca014618	#N/A	Ea-	768	complete	ISS_1	IPR029044	protein CDI	Nucleotide-diphospho-sugar transferases superfamily protein	LOC_Os07g23120	0.7	0.87	0.79	2104.55	839.08	3141.65	1909.15	-1.32663	0.578011	-0.140581	0.847356	0.616956	0.247883	-		-	-	-	COCehwD010014.1	CN01_08P005680
CN01_02P007310	CN01_02G007310	#N/A	#N/A	INPS1,RINO1,LOC103717215,LOC103701736,LOC109009394,RCOM_0197350	#N/A	Ea-	1533	complete	ISS_1	IPR002587,IPR036291,IPR013021	Inositol-3-phosphate synthase	myo-inositol-1-phosphate synthase 2	LOC_Os03g09250	0.91	1	1	1951.77	653.843	2263.3	2296.3	-1.57777	0.213644	0.234522	0.87098	0.321943	0.34904	K01858|1|0.0|958|rcu:RCOM_0197350|myo-inositol-1-phosphate synthase [EC:5.5.1.4]		GO:0044424//intracellular part	GO:0016872//intramolecular lyase activity	GO:0006644//phospholipid metabolic process;GO:0006020//inositol metabolic process	COCehwD023286.1	CN01_02P007310
CN01_scaffold049646P000020	CN01_scaffold049646G000020	PSI	#N/A	PSAK,LOC103710511,103989557,103997534	#N/A	Ea-	390	complete	ISS_1	IPR017493,IPR035982,IPR000549,IPR023618	photosystem I reaction center subunit psaK, chloroplastic	photosystem I subunit K	LOC_Os07g05480	0.69	0.99	0.95	1229.18	572.047	1884.43	2193.57	-1.1035	0.616428	0.835577	0.815717	0.637185	0.733479	K02698|1|8e-40|159|vvi:100261762|photosystem I subunit X		GO:0009521;GO:0031224//intrinsic to membrane;GO:0009534//chloroplast thylakoid	-	GO:0044237//cellular metabolic process	COCehwD019667.1	CN01_U02P021650
CN01_11P013640	CN01_11G013640	#N/A	#N/A	GGCT2;2,GGCT2;1,GGCT2;3,ARPC1B,CHAC2,LOC103700223	#N/A	Ea-	366	fragment	ISS_3	IPR006840	putative cation transport regulator-like protein 2	ChaC-like family protein	LOC_Os02g26700	0.64	0.86	0.74	1111	408.19	537.157	858.43	-1.44455	-1.04844	-0.372086	0.857537	0.785718	0.480778	K07232|1|1e-16|82.4|ath:AT1G44790|cation transport protein ChaC		-	-	-	COCehwD016424.1	CN01_11P013640
CN01_01P004310	CN01_01G004310	#N/A	#N/A	At4g30420,At4g28040,At1g21890,WAT1,103969075,102713396	#N/A	Ea-	1125	complete	ISS_1	IPR030184,IPR000620	WAT1-related protein At4g30420	nodulin MtN21 /EamA-like transporter family protein	LOC_Os09g25810	0.61	0.93	0.96	912.547	369.04	981.37	706.535	-1.30612	0.104899	-0.369137	0.844335	0.201202	0.480382	-		GO:0044464//cell part	-	-	COCehwD012138.1	CN01_01P004310
CN01_02P001030	CN01_02G001030	#N/A	#N/A	HSP17.9-D,SHSP-1,HSP18,LOC103709606,LOC103720807,sHSP	#N/A	Ea-	468	complete	ISS_1	IPR031107,IPR002068,IPR008978	17.3 kDa class II heat shock protein	17.6 kDa class II heat shock protein	LOC_Os01g08860	0.66	0.99	0.99	606.997	291.693	430.887	526.16	-1.05724	-0.49438	-0.206187	0.805129	0.559446	0.326439	K13993|1|1e-57|219|pop:POPTR_832078|HSP20 family protein		-	-	-	COCehwD015541.1	CN01_02P001030
CN01_06P001700	CN01_06G001700	SOS	TF,bHLH	BHLH41,BHLH,TT8,MYC2,LOC103712862,ACMD2_01859	43	Ea-	489	fragment	ISS_3	IPR011598,IPR036638	putative transcription factor bHLH041	basic helix-loop-helix (bHLH) DNA-binding family protein	LOC_Os01g39330	0.48	0.93	0.34	1026.94	261.88	1198.99	1574.33	-1.97138	0.223459	0.616381	0.892722	0.331651	0.647309	K13422|1|6e-10|61.6|mtr:MTR_8g067280|transcription factor MYC2		-	-	-	COCehwD007430.1	CN01_06P001700
CN01_01P018850	CN01_01G018850	#N/A	#N/A	ACT3,ACT7,LOC103704349,ACT1,LOC103710104,LOC103703166	#N/A	Ea-	1134	complete	ISS_1	IPR004000,IPR020902,IPR004001	Actin	actin 7	LOC_Os11g06390	0.97	1	1	562.59	243.05	360.433	457.465	-1.21083	-0.642351	-0.298423	0.831768	0.644086	0.417699	K10355|1|0.0|701|osa:4337566|actin, other eukaryote;K05692|2|0.0|700|bdi:100834364|actin beta/gamma 1		GO:0043232	GO:0032559	-	COCehwD003375.1	CN01_01P018850
CN01_contig69169965P000010	CN01_contig69169965G000010	#N/A	#N/A	PIP1-2,PIP1-1,PIP1.4,AQP,LOC103705518,ACMD2_06655	#N/A	Ea-	369	fragment	ISS_3	IPR034294,IPR000425,IPR023271	putative aquaporin PIP1-2	plasma membrane intrinsic protein 1,4	LOC_Os04g47220	0.89	0.89	0.38	473.69	231.107	377.337	309.67	-1.03538	-0.328091	-0.613212	0.800542	0.436334	0.638976	K09872|1|2e-52|201|aly:ARALYDRAFT_912203|aquaporin PIP		-	-	-	COCehwD000169.1	COCehwD000169.1
CN01_scaffold015856P000040	CN01_scaffold015856G000040	#N/A	#N/A	TIL,CHL,TIC214,COP10,LOC103710410,JCGZ_03997,CDL15_Pgr021130	#N/A	Ea-	567	complete	ISS_1	IPR022272,IPR000566,IPR022271,IPR012674,IPR002446	temperature-induced lipocalin-1	temperature-induced lipocalin	LOC_Os02g39930	0.76	0.97	0.95	615.503	225.953	631.693	674.27	-1.44574	0.0374577	0.13156	0.85764	0.115625	0.23519	K03098|1|2e-83|305|rcu:RCOM_0700620|outer membrane lipoprotein Blc		-	-	GO:0051234//establishment of localization	COCehwD006404.1	CN01_U02P024250
CN01_07P003390	CN01_07G003390	#N/A	#N/A	At1g32060,LOC103706299,LOC103720990,LOC104611432,LOC104600397	#N/A	Ea-	1230	complete	ISS_1	IPR006082,IPR006083,IPR027417	phosphoribulokinase, chloroplastic	phosphoribulokinase	LOC_Os02g47020	0.83	1	1	446.41	213.493	820.943	796.625	-1.06418	0.878913	0.835531	0.803915	0.734242	0.732207	K00855|1|0.0|690|pop:POPTR_712554|phosphoribulokinase [EC:2.7.1.19]		GO:0009536//plastid	GO:0016301//kinase activity;GO:0032559	GO:0015977//carbon fixation;GO:0006796//phosphate-containing compound metabolic process;GO:0044238//primary metabolic process	COCehwD007757.1	CN01_07P003390
CN01_16P001740	CN01_16G001740	#N/A	#N/A	CHLH,GLCNAC1PUT2,LOC103716430,LOC104589963,LOC104585878,glysoja_040871	#N/A	Ea-	4110	complete	ISS_1	IPR003672,IPR011771,IPR022571	magnesium-chelatase subunit ChlH, chloroplastic	magnesium-chelatase subunit chlH, chloroplast, putative / Mg-protoporphyrin IX chelatase, putative (CHLH)	LOC_Os03g20700	0.85	1	1	494.81	191.493	693.417	658.77	-1.36958	0.486848	0.4129	0.848667	0.559626	0.51286	K03403|1|0.0|2370|vvi:100258964|magnesium chelatase subunit H [EC:6.6.1.1]		-	GO:0051003	GO:0006779//porphyrin-containing compound biosynthetic process	COCehwD012874.1	CN01_16P001740
CN01_03P010640	CN01_03G010640	#N/A	#N/A	CAB2,CAB91R,CAB40,CAB7,LOC104590455,RchiOBHm_Chr5g0067271	#N/A	Ea-	594	complete	ISS_2	IPR023329,IPR022796,IPR001344	Chlorophyll a-b binding protein 2, chloroplastic	photosystem II light harvesting complex gene B1B2	LOC_Os01g41710	0.58	0.99	0.99	488.3	179.197	330.57	441.345	-1.44622	-0.562812	-0.145861	0.856971	0.60118	0.258146	K08912|1|7e-70|261|bdi:100822184|light-harvesting complex II chlorophyll a/b binding protein 1		GO:0034357;GO:0044425//membrane part;GO:0009536//plastid	-	GO:0044237//cellular metabolic process	COCehwD027571.1	CN01_03P010640
CN01_scaffold006479P000010	CN01_scaffold006479G000010	#N/A	#N/A	OFUT9,GP1,LECRK14,MA16_Dca002211,CFOL_v3_34686	#N/A	Ea-	384	complete	ISS_4	#N/A	conserved hypothetical protein	#N/A	LOC_Os05g47790	0.3	0.39	0.05	485.777	162.453	263.563	371.715	-1.58027	-0.882144	-0.386096	0.868842	0.732484	0.496548	-		-	-	-	COCehwD022890.1	CN01_U03P013950
CN01_12P007620	CN01_12G007620	#N/A	#N/A	MED37D,HSP70,SCE70,CDL15_Pgr022627,CDL15_Pgr022624,LOC_Os11g47760	#N/A	Ea-	1761	complete	ISS_2	IPR018181,IPR013126,IPR029047,IPR029048	Heat shock 70 kDa protein	heat shock protein 70	LOC_Os01g62290	0.95	1	0.9	1122.49	140.467	626.54	732.6	-2.9984	-0.84122	-0.615601	0.914601	0.723928	0.646965	K03283|1|0.0|936|vvi:100253562|heat shock 70kDa protein 1/8		-	GO:0016628//oxidoreductase activity, acting on the CH-CH group of donors, NAD or NADP as acceptor;GO:0032559	GO:0008152//metabolic process;GO:0050896//response to stimulus	COCehwD026430.1	CN01_12P007620
CN01_scaffold008631P000020	CN01_scaffold008631G000020	#N/A	#N/A	SMT1,Smt1-1,SMT3,SMT2,LOC103697536,LOC103717656	#N/A	Ea-	561	fragment	ISS_3	IPR013705,IPR030384,IPR029063,IPR013216	putative Cycloartenol-C-24-methyltransferase	sterol methyltransferase 1	LOC_Os07g10600	0.58	0.99	0.53	293.967	139.127	144.53	187.77	-1.07925	-1.02428	-0.646686	0.807557	0.775452	0.65558	K00559|1|5e-65|244|gmx:548073|sterol 24-C-methyltransferase [EC:2.1.1.41]		-	GO:0008168//methyltransferase activity	GO:0008152//metabolic process	COCehwD026484.1	CN01_U02P024310
CN01_scaffold003174P000010	CN01_scaffold003174G000010	#N/A	#N/A	DNAJ1,LDJ2,ATJ2,LOC103705715,B456_N007500,LOC107903356,GOBAR_DD29270	#N/A	Ea-	1248	complete	ISS_1	IPR036869,IPR012724,IPR001623,IPR002939,IPR001305,IPR008971,IPR036410,IPR018253	dnaJ protein	DNAJ homologue 2	LOC_Os03g44620	0.89	1	1	338.203	127.19	264.453	231.475	-1.41091	-0.354878	-0.547034	0.851067	0.453026	0.60509	K09503|1|9e-175|611|vvi:100251979|DnaJ homolog subfamily A member 2		GO:0044464//cell part	GO:0005515//protein binding	-	COCehwD014278.1	CN01_U02P023450
CN01_scaffold006458P000010	CN01_scaffold006458G000010	#N/A	#N/A	DCL4,PPXI,STL2,HCS,LOC103696971,LOC103720668	#N/A	Ea-	405	fragment	ISS_3	#N/A	putative Holocarboxylase synthetase	Uncharacterised conserved protein UCP009193	LOC_Os01g40690	0.57	0.99	0.74	304.717	121.81	144.33	222.535	-1.32284	-1.0781	-0.453436	0.841397	0.790462	0.540269	-		-	-	-	COCehwD022856.1	CN01_U02P022670
CN01_scaffold000873P000020	CN01_scaffold000873G000020	#N/A	#N/A	DNAJ1,LDJ2,ATJ2,B456_N007500,LOC107903356,GOBAR_DD29270,103990939	#N/A	Ea-	1056	complete	ISS_2	IPR001623,IPR036410,IPR008971,IPR018253,IPR001305,IPR036869,IPR002939	DnaJ protein	DNAJ homologue 2	LOC_Os03g57340	0.7	1	1	646.637	120.06	407.78	389.8	-2.4292	-0.665164	-0.730221	0.905606	0.660751	0.694931	K09503|1|5e-160|561|vvi:100233131|DnaJ homolog subfamily A member 2		-	-	-	COCehwD026577.1	CN01_U01P004910
CN01_03P006570	CN01_03G006570	#N/A	#N/A	INPS1,LOC103717215,LOC103701736,LOC109009394	#N/A	Ea-	1533	complete	ISS_1	IPR002587,IPR036291,IPR013021	Inositol-3-phosphate synthase	myo-inositol-1-phosphate synthase 2	LOC_Os03g09250	0.9	1	1	756.603	116.867	1277.4	885.42	-2.69467	0.755598	0.226825	0.910545	0.698293	0.348373	K01858|1|0.0|946|rcu:RCOM_0197350|myo-inositol-1-phosphate synthase [EC:5.5.1.4]		GO:0044424//intracellular part	GO:0016872//intramolecular lyase activity	GO:0006644//phospholipid metabolic process;GO:0006020//inositol metabolic process	COCehwD025965.1	CN01_03P006570
CN01_15P001540	CN01_15G001540	#N/A	#N/A	AC101,ACT7,ACT3,LOC103703166,LOC104586251,LOC103696476,LOC104599877	#N/A	Ea-	1134	complete	ISS_1	IPR004000,IPR020902,IPR004001	Actin-101	actin 7	LOC_Os11g06390	0.98	1	1	279.983	111.107	315.657	290.51	-1.3334	0.173015	0.0532469	0.84199	0.276941	0.125751	K05692|1|0.0|746|rcu:RCOM_0503940|actin beta/gamma 1;K10355|4|0.0|746|osa:4349863|actin, other eukaryote		GO:0043232	GO:0032559	-	COCehwD009353.1	CN01_15P001540
CN01_01P009750	CN01_01G009750	#N/A	#N/A	NPF6.4,NPF6.2,NPF6.3,NPF8.1,LOC103713059,VIT_12s0059g01240,Ccrd_010928	#N/A	Ea-	1743	complete	ISS_1	IPR000109,IPR020846,IPR036259	protein NRT1/ PTR FAMILY 6.4	Major facilitator superfamily protein	LOC_Os04g39030	0.65	1	0.98	293.07	100.437	387.007	560.7	-1.54496	0.401113	0.935984	0.862227	0.492519	0.761869	K14638|1|9e-120|429|ppp:PHYPADRAFT_189464|solute carrier family 15 (peptide/histidine transporter), member 3/4		GO:0044464//cell part	-	GO:0015833//peptide transport	COCehwD010165.1	CN01_01P009750
CN01_10P004330	CN01_10G004330	#N/A	#N/A	HOP3,HOP1,HOP,HOP2,LOC103708511,LOC103712179	#N/A	Ea-	966	fragment	ISS_3	IPR041243,IPR011990,IPR006636,IPR013026,IPR019734,IPR001440	putative Hsp70-Hsp90 organizing protein 3	stress-inducible protein, putative	LOC_Os02g43020	0.79	0.9	0.51	202.96	95.1033	186.983	182.575	-1.09363	-0.118286	-0.152706	0.805784	0.221473	0.25607	K09553|1|6e-144|508|rcu:RCOM_1679700|stress-induced-phosphoprotein 1		-	-	-	COCehwD002434.1	CN01_10P004330
CN01_06P002400	CN01_06G002400	#N/A	#N/A	LOC103719665,LOC103719163,ACMD2_06445,MA16_Dca026469	#N/A	Ea-	954	complete	ISS_1	IPR013989	B2 protein	DCD (Development and Cell Death) domain protein	LOC_Os01g36950	0.53	0.99	0.99	252.29	95.0967	147.453	246.25	-1.40762	-0.774825	-0.0349593	0.849067	0.695487	0.0999479	-		-	-	-	COCehwD016866.1	CN01_06P002400
CN01_06P011940	CN01_06G011940	#N/A	#N/A	APR1,APR3,APR2,LOC103719146,ACMD2_10121,LOC104612772	#N/A	Ea-	1482	complete	ISS_1	IPR002500,IPR013766,IPR014729,IPR036249,IPR004508	5'-adenylylsulfate reductase 1, chloroplastic	APS reductase 3	LOC_Os07g32570	0.69	1	1	473.873	92.2033	771.53	924.64	-2.36161	0.703221	0.96439	0.903392	0.673803	0.767522	K05907|1|2e-179|627|ath:AT4G04610|adenylyl-sulfate reductase (glutathione) [EC:1.8.4.9]		-	GO:0003824//catalytic activity	GO:0008152//metabolic process;GO:0009987//cellular process	COCehwD027661.1	CN01_06P011940
CN01_16P001060	CN01_16G001060	#N/A	#N/A	PIP1-2,PIP1-1,PIP1-5,AQP,LOC103717431,542434	#N/A	Ea-	465	complete	ISS_2	IPR023271,IPR000425,IPR034294	Plasma membrane intrinsic protein1	plasma membrane intrinsic protein 1,4	LOC_Os04g47220	0.81	0.66	0.35	226.757	91.97	128.113	112.8	-1.30191	-0.823724	-1.00738	0.836906	0.710938	0.777691	K09872|1|6e-43|171|osa:4330248|aquaporin PIP		-	-	-	COCehwD018038.1	CN01_16P001060
CN01_13P003800	CN01_13G003800	#N/A	#N/A	PUMP4,PUMP5,PUMP6,DTC,LOC103722297,LOC103716172,GOBAR_DD04323	#N/A	Ea-	1086	complete	ISS_2	IPR002067,IPR018108,IPR023395	Mitochondrial uncoupling protein 4	uncoupling protein 5	LOC_Os08g37370	0.79	0.86	0.98	209.623	90.74	192.75	421.69	-1.20799	-0.121068	1.00838	0.825442	0.221673	0.782238	K15104|1|2e-117|420|vvi:100245527|solute carrier family 25 (mitochondrial oxoglutarate transporter), member 11		GO:0016020//membrane	-	GO:0006810//transport	COCehwD013735.1	CN01_13P003800
CN01_04P006020	CN01_04G006020	#N/A	#N/A	ZIFL2,ZIFL1,ZIF1,ANTR4,LOC103697307,LOC103712253	#N/A	Ea-	1233	complete	ISS_2	IPR036259,IPR020846,IPR011701,IPR001958	Protein ZINC INDUCED FACILITATOR-LIKE 1	zinc induced facilitator-like 1	LOC_Os12g03899	0.66	0.96	0.81	191.477	90.6833	169.593	192.875	-1.07826	-0.175089	0.0104976	0.803329	0.285994	0.0694618	-		GO:0044464//cell part	-	-	COCehwD006266.1	CN01_04P006020
CN01_scaffold014605P000130	CN01_scaffold014605G000130	#N/A	#N/A	ZHD4,ZHD3,LOC103720824,MA16_Dca014097	#N/A	Ea-	825	complete	ISS_1	IPR006456,IPR009057,IPR006455	zinc-finger homeodomain protein 4	homeobox protein 21	LOC_Os11g13930	0.46	0.97	0.75	265.357	89.2033	270.717	337.3	-1.57276	0.0288509	0.3461	0.864297	0.103842	0.462109	-		-	GO:0003676//nucleic acid binding	-	COCehwD005440.1	CN01_U01P009800
CN01_scaffold000307P000030	CN01_scaffold000307G000030	#N/A	#N/A	TCEA1,TCEA2,HIDM,CXE13,LOC103718723,LOC103718722,LOC103722527,LOC103695696	#N/A	Ea-	954	complete	ISS_2	IPR029058,IPR013094	Tuliposide A-converting enzyme 2, chloroplastic	alpha/beta-Hydrolases superfamily protein	LOC_Os09g28720	0.49	1	1	160.507	75.9133	191.157	170.3	-1.08021	0.252122	0.0854452	0.800784	0.357472	0.184616	K13258|1|1e-58|224|gmx:547489|2-hydroxyisoflavanone dehydratase [EC:4.2.1.105];K14493|2|5e-28|123|vvi:100249385|gibberellin receptor GID1 [EC:3.-.-.-]		-	-	-	COCehwD013927.1	CN01_U01P005000
CN01_10P005850	CN01_10G005850	#N/A	#N/A	HIPP39,HIPP15,HIPP14,HIPP12,LOC103716912,AQUCO_03800108v1,ACMD2_19429	#N/A	Ea-	339	complete	ISS_2	#N/A	Heavy metal-associated isoprenylated plant protein 39	Heavy metal transport/detoxification superfamily protein	LOC_Os10g38870	0.43	0.99	0.8	162.73	72.8967	228.653	234.205	-1.15856	0.490682	0.525292	0.815165	0.554089	0.590561	-		-	-	-	COCehwD023070.1	CN01_10P005850
CN01_04P001980	CN01_04G001980	#N/A	#N/A	MED37C,HSP70,MED37E,HSC-2,CDL15_Pgr022627,CDL15_Pgr022624,F383_20548,LOC_Os11g47760	#N/A	Ea-	1722	complete	ISS_1	IPR013126,IPR029048,IPR018181,IPR029047	Heat shock 70 kDa 4-like protein	heat shock protein 70	LOC_Os05g38530	0.94	1	0.88	486.737	72.0433	241.697	298.48	-2.7562	-1.00994	-0.705507	0.910676	0.776155	0.685941	K03283|1|0.0|845|vvi:100259551|heat shock 70kDa protein 1/8		-	GO:0016628//oxidoreductase activity, acting on the CH-CH group of donors, NAD or NADP as acceptor;GO:0032559	GO:0008152//metabolic process;GO:0050896//response to stimulus	COCehwD011098.1	CN01_04P001980
CN01_08P006710	CN01_08G006710	#N/A	#N/A	BI1,BI-1,LFG5,LFG3,LOC103716728,LOC103698203,103989912	#N/A	Ea-	741	complete	ISS_1	IPR006214,IPR006213	bax inhibitor 1	BAX inhibitor 1	LOC_Os02g03280	0.76	0.95	0.95	251.157	71.0567	195.983	230.36	-1.82155	-0.357857	-0.124697	0.880699	0.459383	0.222403	-		-	-	GO:0043066//negative regulation of apoptotic process	COCehwD002527.2	CN01_08P006710
CN01_scaffold038507P000010	CN01_scaffold038507G000010	#N/A	RLK?	unknown_gene	#N/A	Ea-	426	missing_functional_completeness	ISS_5	#N/A	hypothetical protein	#N/A	LOC_Os04g57710	0.3	0.44	0.37	154.57	69.9467	89.09	89.63	-1.14393	-0.794925	-0.786207	0.810578	0.695459	0.704339	-		-	-	-	COCehwD016569.1	CN01_U03P006170
CN01_03P012930	CN01_03G012930	#N/A	#N/A	GTE10,PER12,INV2,LOC103702959	#N/A	Ea-	1125	complete	ISS_4	IPR006476	conserved hypothetical protein	Plant protein 1589 of unknown function	LOC_Os01g12080	0.77	0.98	0.98	148.773	69.6	73.07	77.855	-1.09596	-1.02576	-0.934254	0.80288	0.769447	0.747716	-		-	-	-	COCehwD021645.1	CN01_03P012930
CN01_11P009270	CN01_11G009270	ABA	ZF,B-box,COL,CCT	COL5,COL4,COL3,COL2,LOC103707107,LOC103701702,LOC104599091	4	Ea-	1077	complete	ISS_1	IPR010402,IPR000315	zinc finger protein CONSTANS-LIKE 4	CONSTANS-like 5	LOC_Os04g42020	0.55	0.89	0.81	171.417	67.4833	134.873	168.205	-1.3449	-0.345902	-0.0272868	0.838251	0.447821	0.0990405	K12135|1|5e-53|206|aly:ARALYDRAFT_488429|zinc finger protein CONSTANS;K12127|5|3e-09|61.2|smo:SELMODRAFT_438647|pseudo-response regulator 1		-	-	-	COCehwD021491.1	CN01_11P009270
CN01_03P008730	CN01_03G008730	#N/A	#N/A	HSP18.2,HSP17.9A,HSP17.5-M,HSP18.5-C,LOC103720951,LOC104609165,LOC103701878,LOC103701876	#N/A	Ea-	663	modules	ISS_3	IPR002068,IPR008978,IPR031107	putative 18.2 kDa class I heat shock protein	HSP20-like chaperones superfamily protein	LOC_Os01g04380	0.78	0.67	0.99	1025.01	63.49	597.547	1021.35	-4.01297	-0.778519	-0.00516534	0.92125	0.704498	0.0699416	K13993|1|5e-51|198|pop:POPTR_579131|HSP20 family protein		-	-	-	COCehwD025079.1	CN01_03P008730
CN01_10P006140	CN01_10G006140	#N/A	#N/A	SCL8,SCL1,PAT1,SCL21,LOC103719657,LOC103702695,103982658	#N/A	Ea-	1392	fragment	ISS_3	IPR005202,IPR030013	putative Scarecrow-like protein 8	SCARECROW-like 8	LOC_Os04g49110	0.5	0.99	0.72	134.553	62.7167	91.5633	131.98	-1.10126	-0.555336	-0.0278588	0.801218	0.58908	0.0985607	K14494|1|4e-36|150|gmx:100799695|DELLA protein		-	-	-	COCehwD027516.1	CN01_10P006140
CN01_04P004790	CN01_04G004790	PS?	#N/A	RPT2,SR1IP1,At5g48800,At1g03010,LOC103716684,RPT2_8	#N/A	Ea-	1413	complete	ISS_2	IPR027356	Root phototropism protein 2	Phototropic-responsive NPH3 family protein	LOC_Os11g02610	0.48	0.98	0.86	239.57	62.3333	329.697	392.49	-1.94237	0.460692	0.712209	0.886328	0.536225	0.684793	-		-	GO:0005488//binding	GO:0009606//tropism	COCehwD022736.1	CN01_04P004790
CN01_scaffold001181P000030	CN01_scaffold001181G000030	#N/A	#N/A	ML4,Sb1376s002010,AXF42_Ash019760,Sb1303s002040	#N/A	Ea-	513	modules	ISS_4	#N/A	conserved hypothetical protein	PHD finger family protein	LOC_Os02g52960	0.35	0.32	0.04	169.57	61.5433	77.9433	125.18	-1.46221	-1.12138	-0.437877	0.850212	0.792999	0.526533	-		-	-	-	COCehwD002924.1	CN01_U03P004850
CN01_scaffold023557P000010	CN01_scaffold023557G000010	#N/A	#N/A	PUB10,TPLATE,At1g60995,LOC103703347,LOC103701767,LOC103701759,LOC103703421	#N/A	Ea-	732	complete	ISS_4	IPR007541	conserved hypothetical protein	Plant basic secretory protein (BSP) family protein	LOC_Os05g50500	0.48	0.88	0.72	162.08	61.1167	168.847	145.67	-1.40707	0.0590076	-0.154002	0.84428	0.136681	0.254985	-		-	-	-	COCehwD011156.1	CN01_U03P004190
CN01_scaffold004706P000020	CN01_scaffold004706G000020	ABA	MYB,SANT	GLK1,GLK2,LOC103702471,103969266,LOC104599471	6	Ea-	1230	complete	ISS_2	IPR001005,IPR009057,IPR006447,IPR017930	Transcription activator GLK1	GBF\'s pro-rich region-interacting factor 1	LOC_Os06g24070	0.44	1	1	283.747	60.4867	357.993	373.265	-2.22991	0.335329	0.395597	0.897619	0.44469	0.502587	K14491|1|4e-18|90.9|ota:Ot16g01320|two-component response regulator ARR-B family		-	-	-	COCehwD019228.2	CN01_U02P024660
CN01_08P007680	CN01_08G007680	ABA	MYB,SANT	RVE5,RVE6,RVE3,RVE8,LOC103710700,LOC103712234	6	Ea-	1041	complete	ISS_2	IPR001005,IPR006447,IPR009057,IPR017930	Protein REVEILLE 5	Homeodomain-like superfamily protein	LOC_Os02g45670	0.65	0.87	0.98	292.43	60.13	293.617	577	-2.28193	0.00584254	0.98048	0.899419	0.0808478	0.772622	K12134|1|2e-19|95.1|aly:ARALYDRAFT_904154|circadian clock associated 1;K12133|3|5e-19|93.6|ath:AT1G01060|LATE ELONGATED HYPOCOTYL		-	-	-	COCehwD001815.1	CN01_08P007680
CN01_14P012530	CN01_14G012530	#N/A	#N/A	TUBA3,TUBA1,TUBA6,TUBA,LOC103723819,ACMD2_23615,AMTR_s00068p00090790,4343694	#N/A	Ea-	1287	complete	ISS_1	IPR008280,IPR036525,IPR000217,IPR018316,IPR002452,IPR037103,IPR013838,IPR003008,IPR017975,IPR023123	Tubulin alpha-3 chain	tubulin alpha-5	LOC_Os07g38730	0.9	1	1	131.557	58.4333	102.39	122.35	-1.17082	-0.36161	-0.10467	0.813496	0.452957	0.195922	K07374|1|0.0|751|vvi:100260286|tubulin alpha		GO:0043234//protein complex;GO:0015630//microtubule cytoskeleton;GO:0030312//external encapsulating structure;GO:0044444//cytoplasmic part	GO:0017111//nucleoside-triphosphatase activity;GO:0032561//guanyl ribonucleotide binding	GO:0010038//response to metal ion;GO:0043623//cellular protein complex assembly;GO:0009207;GO:0007017//microtubule-based process	COCehwD003634.1	CN01_14P012530
CN01_02P015670	CN01_02G015670	#N/A	AUX,IAA,ARF	ARF2A,ARF2,ARF23,LOC103722948,LOC103708057	17	Ea-	2505	complete	ISS_1	IPR000270,IPR003340,IPR015300,IPR010525,IPR033389	auxin response factor 23	auxin response factor 2	LOC_Os11g32110	0.62	0.94	0.98	179.737	58.3633	109.66	219.065	-1.62275	-0.712847	0.285474	0.86518	0.668432	0.403922	K14486|1|3e-150|530|mtr:MTR_2g005240|auxin response factor		-	-	-	COCehwD001605.1	CN01_02P015670
CN01_scaffold021932P000020	CN01_scaffold021932G000020	#N/A	#N/A	ZIP4,ycf4,ABCB25,PUX10,LOC103705697,LOC103715193,FSB_LOCUS17976,PanWU01x14_044700	#N/A	Ea-	423	fragment	ISS_4	IPR036758,IPR007493	conserved hypothetical protein	Protein of unknown function, DUF538	LOC_Os01g68500	0.62	0.74	0.6	159.91	58.09	157.053	211.34	-1.4609	-0.0260056	0.402306	0.849363	0.102863	0.498947	-		-	-	-	COCehwD010024.1	CN01_U03P003940
CN01_04P000860	CN01_04G000860	#N/A	#N/A	SYP81,HSP18.2,HSP18.5-C,HSP17.7,LOC103698709,ACMD2_05964,CFP56_25457,LOC100835373	#N/A	Ea-	1440	modules	ISS_3	IPR008978,IPR002068,IPR019529,IPR010989	putative Syntaxin-81	syntaxin of plants 81	LOC_Os12g05810	0.74	0.56	0.87	548.85	56.16	323.677	310.9	-3.2888	-0.761859	-0.819961	0.915346	0.696342	0.725386	K08492|1|9e-102|369|zma:100193453|syntaxin 18		GO:0044464//cell part	-	GO:0006810//transport	COCehwD004569.3	CN01_04P000860
CN01_15P005730	CN01_15G005730	#N/A	TF,bHLH	SCRM,SCRM2,BHLH93,BHLH61,LOC103708058,ICE1-6,ICE1,LOC104591842	#N/A	Ea-	1596	complete	ISS_1	IPR011598,IPR036638	transcription factor ICE1	basic helix-loop-helix (bHLH) DNA-binding superfamily protein	LOC_Os11g32100	0.58	0.59	0.59	131.177	54.59	86.9033	125.16	-1.2648	-0.594028	-0.0677376	0.824987	0.607854	0.153922	-		-	-	-	COCehwD022864.1	CN01_15P005730
CN01_15P005720	CN01_15G005720	#N/A	AUX,IAA,ARF	ARF23,ARF2,ARF2A,LOC103708057,LOC103722948	17	Ea-	2493	complete	ISS_1	IPR015300,IPR003340,IPR010525,IPR033389,IPR000270	auxin response factor 23	auxin response factor 2	LOC_Os11g32110	0.6	0.94	0.98	137.45	50.5167	129.987	170.685	-1.44408	-0.0805433	0.312429	0.844638	0.170238	0.420035	K14486|1|2e-148|524|gmx:100793224|auxin response factor		-	-	-	COCehwD022865.1	CN01_15P005720
CN01_10P007300	CN01_10G007300	#N/A	#N/A	CBSX1,CBSX2,CBSX3,SNF4,LOC103723298,MA16_Dca018569,MJ1232	#N/A	Ea-	786	complete	ISS_2	IPR000644	CBS domain-containing protein DDB_G0289609	#N/A	LOC_Os04g05010	0.59	0.75	0.76	120.503	48.8167	159.13	134.725	-1.30363	0.401133	0.160945	0.827774	0.485562	0.265196	-		GO:0043231//intracellular membrane-bounded organelle	-	-	COCehwD012804.2	CN01_10P007300
CN01_03P007230	CN01_03G007230	#N/A	MATE	DTX27,DTX28,DTX26,DTX21,LOC103717979,103994919,LOC100845763	#N/A	Ea-	1431	complete	ISS_1	IPR002528	protein DETOXIFICATION 27	MATE efflux family protein	LOC_Os03g08900	0.74	0.99	0.98	114.98	46.7733	124.81	113.48	-1.29762	0.118351	-0.0189449	0.826698	0.218846	0.0803713	K03327|1|0.0|731|bdi:100845763|multidrug resistance protein, MATE family		GO:0044464//cell part	GO:0015291//secondary active transmembrane transporter activity	GO:0003006//developmental process involved in reproduction;GO:0015893//drug transport	COCehwD020609.1	CN01_03P007230
CN01_04P004700	CN01_04G004700	#N/A	STK	STN8,STN7,STT7,PEPKR2,LOC103706313,BVC80_1767g26	#N/A	Ea-	1497	complete	ISS_1	IPR000719,IPR008271,IPR011009	serine/threonine-protein kinase STN8, chloroplastic	Protein kinase superfamily protein	LOC_Os05g40180	0.72	0.9	0.76	101.41	45.82	191.83	161.475	-1.14615	0.919628	0.671111	0.803191	0.741013	0.660419	K08282|1|2e-09|62.0|cme:CMS463C|non-specific serine/threonine protein kinase [EC:2.7.11.1];K08818|2|1e-07|56.2|aly:ARALYDRAFT_919626|cell division cycle 2-like [EC:2.7.11.22];K08819|3|3e-07|55.1|gmx:100795971|cyclin-dependent kinase 12/13 [EC:2.7.11.22 2.7.11.23];K08789|5|5e-07|54.3|vcn:VOLCADRAFT_42650|microtubule-associated serine/threonine kinase [EC:2.7.11.1]		GO:0009536//plastid	GO:0004672//protein kinase activity	GO:0042548//regulation of photosynthesis, light reaction	COCehwD022727.1	CN01_04P004700
CN01_03P000170	CN01_03G000170	#N/A	#N/A	At5g10800,LOC103707495,103993087,MA16_Dca002491,LOC101774426	#N/A	Ea-	1440	complete	ISS_4	IPR023393	conserved hypothetical protein	Polyketide cyclase/dehydrase and lipid transport superfamily protein	LOC_Os11g36070	0.59	0.87	0.75	111.923	44.7933	101.023	142.5	-1.32115	-0.147822	0.348451	0.828298	0.250024	0.454892	-		-	-	-	COCehwD025213.3	CN01_03P000170
CN01_01P016870	CN01_01G016870	#N/A	#N/A	CLA1,TKT2,DXS,Os07g0190000,dxs,LOC103710963,CLA1_11	#N/A	Ea-	2010	complete	ISS_2	IPR009014,IPR020826,IPR005477,IPR029061,IPR005475,IPR033248,IPR005474	1-deoxy-D-xylulose-5-phosphate synthase 1, chloroplastic	Deoxyxylulose-5-phosphate synthase	LOC_Os05g33840	0.87	0.98	0.87	101.697	44.57	84.9933	95.035	-1.19013	-0.258851	-0.0977416	0.810654	0.359313	0.193429	K01662|1|0.0|1100|rcu:RCOM_0679170|1-deoxy-D-xylulose-5-phosphate synthase [EC:2.2.1.7]		GO:0009536//plastid	GO:0016903//oxidoreductase activity, acting on the aldehyde or oxo group of donors;GO:0016744	GO:0006772//thiamine metabolic process;GO:0006721//terpenoid metabolic process	COCehwD011706.1	CN01_01P016870
CN01_03P001580	CN01_03G001580	#N/A	#N/A	RABA1C,YPT3,RABA1D,RAB11D,LOC103695641,LOC103695730,LOC103704518,LOC103716163	#N/A	Ea-	1125	complete	ISS_4	IPR006502	conserved hypothetical protein	Protein of unknown function (DUF506)	LOC_Os03g06680	0.54	0.74	0.92	113.02	44	52.28	78.195	-1.361	-1.11225	-0.53143	0.832678	0.784167	0.579589	-		-	-	-	COCehwD003852.1	CN01_03P001580
CN01_13P006080	CN01_13G006080	#N/A	#N/A	MED33B,MSL10,CHLP,LOC103707398,BVC80_9083g9,COLO4_12248,L484_020961	#N/A	Ea-	882	complete	ISS_2	IPR003774	UPF0301 protein TC_0483	Protein of unknown function (DUF179)	LOC_Os10g18370	0.56	1	1	107.86	41.7433	148.697	144.055	-1.36954	0.463212	0.41746	0.832547	0.528517	0.510273	K07735|1|4e-96|349|gmx:100783218|putative transcriptional regulator		GO:0009507//chloroplast	-	-	COCehwD005925.1	CN01_13P006080
CN01_scaffold011891P000040	CN01_scaffold011891G000040	#N/A	#N/A	At4g22758,At1g19060,LOC103708240,LOC103717403,LOC109010625,JCGZ_20741	#N/A	Ea-	477	complete	ISS_4	IPR040358	conserved hypothetical protein	#N/A	LOC_Os04g33310	0.44	0.87	0.69	128.833	41.5	168.377	207.48	-1.63432	0.386186	0.687466	0.860813	0.478544	0.671715	-		-	-	-	COCehwD002983.1	CN01_U02P005010
CN01_04P013190	CN01_04G013190	#N/A	#N/A	unknown_gene	#N/A	Ea-	504	missing_functional_completeness	ISS_5	#N/A	hypothetical protein	Aluminium induced protein with YGL and LRDR motifs	LOC_Os03g53270	0.33	0.34	0.3	158.447	40.6967	92.33	82.57	-1.96101	-0.779126	-0.940308	0.882893	0.692618	0.751366	-		-	-	-	COCehwD019578.2	CN01_04P013190
CN01_14P006400	CN01_14G006400	#N/A	#N/A	At5g23430,PRL1,DAW1,WDR5A,LOC103714616,ACMD2_07684,LOC101758399,At5g23430_3	#N/A	Ea-	2520	complete	ISS_1	IPR017986,IPR015943,IPR001680,IPR026962,IPR019775,IPR020472,IPR028021,IPR036322	katanin p80 WD40 repeat-containing subunit B1	Transducin/WD40 repeat-like superfamily protein	LOC_Os01g57210	0.58	1	0.99	110.237	39.7767	109.313	122.055	-1.47061	-0.0121348	0.146927	0.843362	0.080634	0.252315	K12862|1|2e-27|123|osa:4332781|pleiotropic regulator 1		-	-	-	COCehwD020158.2	CN01_14P006400
CN01_15P001750	CN01_15G001750	#N/A	#N/A	MED26C,MED26A,MED26B,TFIIS,LOC103701221,LOC103703180	#N/A	Ea-	744	fragment	ISS_3	IPR003617,IPR017923,IPR035441	putative mediator of RNA polymerase II transcription subunit 26c	Transcription elongation factor (TFIIS) family protein	LOC_Os12g06850	0.47	0.96	0.63	104.273	38.4333	66.9467	93.965	-1.43994	-0.639286	-0.150175	0.839148	0.625326	0.250814	-		GO:0044424//intracellular part	-	-	COCehwD009374.1	CN01_15P001750
CN01_scaffold026768P000020	CN01_scaffold026768G000020	#N/A	#N/A	AIR9,LC1,At5g19680,At1g61180,LOC103701548,DNAAF1_2,ACMD2_02669	#N/A	Ea-	1962	complete	ISS_2	IPR001611,IPR003591,IPR032675	Dynein assembly factor 1, axonemal	Outer arm dynein light chain 1 protein	LOC_Os03g09070	0.5	0.94	0.95	153.397	36.4633	195.727	227.405	-2.07275	0.351573	0.567997	0.887452	0.449262	0.612328	-		-	-	-	COCehwD012385.1	CN01_U02P012250
CN01_scaffold000752P000030	CN01_scaffold000752G000030	#N/A	#N/A	AGO1B,AGO1A,AGO1,AGO1C,4331253	#N/A	Ea-	2880	missing_functional_completeness	ISS_4	IPR003100,IPR036397,IPR032474,IPR014811,IPR012337,IPR024357,IPR036085,IPR003165	conserved hypothetical protein	Stabilizer of iron transporter SufD / Polynucleotidyl transferase	LOC_Os06g51310	0.715	0.92	0.87	116.923	34.93	56.94	67.8	-1.74302	-1.03805	-0.786206	0.867221	0.766523	0.698748	K11596|1|0.0|714|sbi:SORBI_06g025560|argonaute		-	GO:0005488//binding	-	COCehwD024885.1	CN01_U02P016280
CN01_scaffold004645P000030	CN01_scaffold004645G000030	#N/A	GLR,NSCC	GLR3.3,GLR3.1,GLR3.2,LOC103704927,LOC103717756	#N/A	Ea-	1311	fragment	ISS_3	IPR001320,IPR001638	putative Glutamate receptor 3.3	glutamate receptor 3.3	LOC_Os02g02540	0.63	0.94	0.45	103.393	34.6133	105.913	99.69	-1.57874	0.0347411	-0.0526225	0.852578	0.102663	0.123164	K05387|1|5e-146|515|aly:ARALYDRAFT_681456|glutamate receptor, ionotropic, other eukaryote		GO:0016020//membrane	GO:0008066//glutamate receptor activity;GO:0005216//ion channel activity	GO:0006810//transport	COCehwD018974.1	CN01_U02P012940
CN01_06P001030	CN01_06G001030	#N/A	PP2C	PP2C06,PP2C53,HAB1,HAB2,LOC103721042,LOC103720341,LOC103709602,LOC103720811	2	Ea-	1512	complete	ISS_2	IPR015655,IPR001932,IPR000222,IPR036457	Protein phosphatase 2C 16	homology to ABI2	LOC_Os01g40094	0.63	0.85	0.85	116.247	31.1767	93.5067	124.13	-1.89865	-0.314048	0.0946625	0.875084	0.406804	0.183636	K14497|1|1e-133|474|bdi:100823766|protein phosphatase 2C [EC:3.1.3.16]		-	GO:0004721//phosphoprotein phosphatase activity	-	COCehwD027935.1	CN01_06P001030
CN01_contig69181831P000010	CN01_contig69181831G000010	#N/A	#N/A	LOC103717683,BVC80_1711g20,ACMD2_17608,MANES_08G019800	#N/A	Ea-	468	complete	ISS_4	#N/A	conserved hypothetical protein	#N/A	LOC_Os12g05210	0.51	0.99	0.93	122.217	22.95	123.86	210.655	-2.41287	0.0192693	0.785441	0.893805	0.0918656	0.708709	-		-	-	-	COCehwD000183.1	COCehwD000183.1
CN01_scaffold015887P000040	CN01_scaffold015887G000040	#N/A	#N/A	INT1,INT2,INT3,INT4,LOC103717543,LOC103708562	#N/A	Ea-	1515	complete	ISS_1	IPR020846,IPR036259,IPR005828,IPR005829,IPR003663	inositol transporter 1	inositol transporter 1	LOC_Os04g41460	0.78	0.99	0.99	108.14	22.8	57.5633	54.505	-2.24579	-0.909678	-0.98844	0.887673	0.724907	0.757468	K08150|1|0.0|696|sbi:SORBI_06g021070|MFS transporter, SP family, solute carrier family 2 (myo-inositol transporter), member 13		GO:0000325//plant-type vacuole;GO:0031224//intrinsic to membrane	GO:0005365//myo-inositol transmembrane transporter activity	GO:0015791//polyol transport	COCehwD006426.1	CN01_U02P005790
CN01_09P002610	CN01_09G002610	#N/A	#N/A	HSP83A,HSP90-1,HSP81-2,HSP81-3,LOC103715800,HSP83-2,POPTR_0017s01160g	#N/A	Ea-	2094	complete	ISS_1	IPR037196,IPR003594,IPR036890,IPR001404,IPR019805,IPR020575,IPR020568	Heat shock protein 83	heat shock protein 90.1	LOC_Os04g01740	0.88	1	0.99	199.44	21.0267	139.01	127.16	-3.24566	-0.520766	-0.64931	0.910504	0.57396	0.6517	K04079|1|0.0|1129|pop:POPTR_592912|molecular chaperone HtpG		-	-	-	COCehwD017717.1	CN01_09P002610
CN01_05P005560	CN01_05G005560	#N/A	#N/A	HSP23,HSP22,HSP24.1,HSP23.6,LOC103697542,LOC104602326	#N/A	Ea-	627	complete	ISS_2	IPR002068,IPR008978	Small heat shock protein, chloroplastic	HSP20-like chaperones superfamily protein	LOC_Os02g52150	0.51	1	1	103.76	18.54	80.9733	81.9	-2.48454	-0.357732	-0.341315	0.892446	0.448427	0.440905	K13993|1|1e-36|150|vvi:100248906|HSP20 family protein		-	-	-	COCehwD023313.1	CN01_05P005560
CN01_06P004430	CN01_06G004430	#N/A	#N/A	CLPB1,CLPB3,CLPB2,LOC103717858,LOC103722025,LOC104611040,BVC80_1759g45	#N/A	Ea-	2751	complete	ISS_1	IPR001270,IPR003959,IPR019489,IPR036628,IPR018368,IPR041546,IPR028299,IPR027417,IPR004176,IPR003593	chaperone protein ClpB1	heat shock protein 101	LOC_Os05g44340	0.87	1	1	188.75	18.07	129.613	153	-3.38481	-0.542263	-0.302945	0.911111	0.58424	0.41239	K03695|1|0.0|1486|bdi:100825913|ATP-dependent Clp protease ATP-binding subunit ClpB		-	GO:0016462//pyrophosphatase activity;GO:0032559	GO:0050896//response to stimulus;GO:0043170	COCehwD009713.1	CN01_06P004430
CN01_07P008390	CN01_07G008390	#N/A	#N/A	LHY,CCA1,RVE8,JMJ706,LOC103720372	#N/A	Ea-	2325	complete	ISS_2	#N/A	protein LHY	Homeodomain-like superfamily protein	LOC_Os08g06110	0.35	0.86	0.93	113.497	16.67	151.117	184.885	-2.76732	0.413013	0.703978	0.89924	0.493491	0.674103	K12133|1|9e-20|97.4|aly:ARALYDRAFT_470177|LATE ELONGATED HYPOCOTYL;K16055|3|9e-15|80.9|sbi:SORBI_04g035560|trehalose 6-phosphate synthase/phosphatase [EC:2.4.1.15 3.1.3.12]		-	-	-	COCehwD025810.3	CN01_07P008390
CN01_15P005010	CN01_15G005010	#N/A	#N/A	ndhB,LOC103721704,AMTR_s00013p00100030,glysoja_039124,100805083	#N/A	Ea-	210	complete	ISS_4	IPR021775	conserved hypothetical protein	Protein of unknown function (DUF 3339)	LOC_Os02g30470	0.78	0.99	0.99	146.387	15.7333	76.18	90.61	-3.21789	-0.9423	-0.692042	0.907276	0.743826	0.66674	-		-	-	-	COCehwD020169.1	CN01_15P005010
CN01_02P006300	CN01_02G006300	#N/A	#N/A	HSP18.2,HSP18.5-C,HSP17.3-B,HSP17.5-M,LOC103701878,LOC103701876	#N/A	Ea-	462	complete	ISS_1	IPR002068,IPR008978,IPR031107	16.9 kDa class I heat shock protein 2	HSP20-like chaperones superfamily protein	LOC_Os01g04380	0.78	0.99	0.99	281.17	15.1167	190.05	257.415	-4.21723	-0.565064	-0.127347	0.919346	0.603856	0.233855	K13993|1|7e-49|190|rcu:RCOM_0497680|HSP20 family protein		-	-	-	COCehwD022968.1	CN01_02P006300
CN01_12P008050	CN01_12G008050	#N/A	#N/A	UVR8,PRAF1,CRK42,RLT1,LOC103697450,ACMD2_20010	#N/A	Ea-	1482	complete	ISS_1	IPR000408,IPR009091	ultraviolet-B receptor UVR8	Regulator of chromosome condensation (RCC1) family protein	LOC_Os05g38270	0.72	0.98	1	144.907	11.45	127.85	167.495	-3.6617	-0.180672	0.208994	0.910414	0.284277	0.321819	K10615|1|3e-11|68.2|cme:CMB070C|E3 ubiquitin-protein ligase HERC4 [EC:6.3.2.19];K11493|4|5e-08|57.8|ota:Ot03g05690|regulator of chromosome condensation		-	-	-	COCehwD002005.1	CN01_12P008050
CN01_scaffold042090P000030	CN01_scaffold042090G000030	#N/A	#N/A	LNK1,LNK2,LNK3,SSU1,LOC103701754,LOC103711256	#N/A	Ea-	1965	complete	ISS_2	IPR039928	protein LNK1	#N/A	LOC_Os01g31360	0.25	0.96	0.74	122.167	8.7	163.87	235.84	-3.81169	0.423701	0.948958	0.909462	0.50271	0.758427	-		-	-	-	COCehwD017664.2	CN01_U02P021470
CN01_02P006280	CN01_02G006280	#N/A	#N/A	HSP18.2,HSP18.5-C,HSP17.3-B,HSP17.5-M,LOC103701878,LOC103701876,103996582	#N/A	Ea-	471	complete	ISS_1	IPR008978,IPR002068,IPR031107	16.9 kDa class I heat shock protein 2	HSP20-like chaperones superfamily protein	LOC_Os01g04380	0.74	0.99	0.99	128.847	7.68667	60.8233	87.24	-4.06715	-1.08296	-0.562594	0.911676	0.779692	0.599426	K13993|1|4e-51|197|rcu:RCOM_0497680|HSP20 family protein		-	-	-	COCehwD022966.1	CN01_02P006280
CN01_09P002360	CN01_09G002360	#N/A	#N/A	HSP83A,HSP90-1,HSP82,HSP81-3,LOC103712435,LOC103715800,LOC103484110,Csa_3G183950	#N/A	Ea-	2091	complete	ISS_1	IPR001404,IPR003594,IPR020568,IPR037196,IPR019805,IPR036890,IPR020575	Heat shock protein 83	heat shock protein 90.1	LOC_Os04g01740	0.86	1	0.99	108.023	6.59667	87.6867	130.515	-4.03346	-0.300914	0.272873	0.909021	0.396193	0.380465	K04079|1|0.0|1136|vvi:100257736|molecular chaperone HtpG		GO:0044424//intracellular part	GO:0005515//protein binding;GO:0032559	GO:0044267//cellular protein metabolic process;GO:0050896//response to stimulus	COCehwD015065.1	CN01_09P002360
CN01_04P013200	CN01_04G013200	#N/A	#N/A	unknown_gene	#N/A	Ea-La-	219	missing_functional_completeness	ISS_5	#N/A	hypothetical protein	BRI1 like	LOC_Os08g25380	0.3	0.68	0.05	300.577	115.437	149.137	119.215	-1.38063	-1.0111	-1.33417	0.847087	0.773473	0.834074	-		-	-	-	COCehwD019577.1	CN01_04P013200
CN01_08P001640	CN01_08G001640	#N/A	#N/A	CLKR27,bkr4,bkr3,gbkr1,CRG98_001285,LOC103708896,LOC109019512,COLO4_23619	#N/A	Ea-La-	459	missing_functional_completeness	ISS_4	IPR000425,IPR023271,IPR002347,IPR036291	conserved hypothetical protein	NAD(P)-binding Rossmann-fold superfamily protein	LOC_Os04g30760	0.83	0.45	0.21	191.703	74.2467	96.2433	75.205	-1.36848	-0.994117	-1.34997	0.842183	0.760511	0.832551	K00059|1|5e-29|124|rcu:RCOM_1081890|3-oxoacyl-[acyl-carrier protein] reductase [EC:1.1.1.100]		-	GO:0004312//fatty acid synthase activity;GO:0000166//nucleotide binding	GO:0006631//fatty acid metabolic process	COCehwD025988.1	CN01_08P001640
CN01_06P019320	CN01_06G019320	#N/A	#N/A	TUBA,TUBA3,TUBA1,LOC103705349,TUBBA,LOC104604220,LOC108992104	#N/A	Ea-La-	1356	complete	ISS_1	IPR017975,IPR037103,IPR018316,IPR003008,IPR000217,IPR002452,IPR023123,IPR036525,IPR008280	Tubulin alpha chain	tubulin alpha-2 chain	LOC_Os03g51600	0.97	1	1	216.047	66.5767	128.063	99.395	-1.69825	-0.754486	-1.1201	0.872822	0.686861	0.803118	K07374|1|0.0|839|mtr:MTR_3g110720|tubulin alpha		GO:0032991//macromolecular complex;GO:0015630//microtubule cytoskeleton	GO:0017111//nucleoside-triphosphatase activity;GO:0032561//guanyl ribonucleotide binding	GO:0043623//cellular protein complex assembly;GO:0009207;GO:0007017//microtubule-based process	COCehwD002246.1	CN01_06P019320
CN01_contig69371439P000010	CN01_contig69371439G000010	#N/A	#N/A	PED1,KAT1,KAT5,SWEETIE,LOC103717936,PED1_0,LOC103717737	#N/A	Ea-La-	165	fragment	ISS_3	#N/A	putative 3-ketoacyl-CoA thiolase 2, peroxisomal	peroxisomal 3-ketoacyl-CoA thiolase 3	LOC_Os02g57260	0.65	0.98	0.12	121.45	54.7533	56.68	47.945	-1.14934	-1.09945	-1.34091	0.807764	0.784119	0.824322	K07513|1|1e-15|79.7|vvi:100247651|acetyl-CoA acyltransferase 1 [EC:2.3.1.16]		-	GO:0016747//transferase activity, transferring acyl groups other than amino-acyl groups	-	COCehwD000400.1	CN01_U03P019850
CN01_11P008020	CN01_11G008020	#N/A	#N/A	AVP1,AVPL2,LOC103706475,LOC103711472,ACMD2_04465,LOC103715891	#N/A	Ea-La-	2298	complete	ISS_1	IPR004131	Pyrophosphate-energized vacuolar membrane proton pump	Inorganic H pyrophosphatase family protein	LOC_Os02g09150	0.89	1	0.99	125.38	53.96	57.1467	52.185	-1.21634	-1.13357	-1.2646	0.81891	0.789359	0.815175	K01507|1|0.0|1335|vvi:100256710|inorganic pyrophosphatase [EC:3.6.1.1]		GO:0031090//organelle membrane;GO:0043231//intracellular membrane-bounded organelle;GO:0016021//integral to membrane	GO:0046872//metal ion binding;GO:0015405;GO:0016628//oxidoreductase activity, acting on the CH-CH group of donors, NAD or NADP as acceptor;GO:0016462//pyrophosphatase activity	GO:0006818//hydrogen transport;GO:0008152//metabolic process	COCehwD018313.1	CN01_11P008020
CN01_14P000430	CN01_14G000430	#N/A	PP2C	PP2C06,PP2C53,HAB1,HAB2,LOC103720341,LOC103721042,LOC103709602	#N/A	Ea-La-	1383	complete	ISS_2	IPR001932,IPR036457,IPR015655,IPR000222	Protein phosphatase 2C 53	homology to ABI2	LOC_Os01g40094	0.71	0.77	0.72	110.163	32.6833	46.3633	98.515	-1.75302	-1.24859	-0.161229	0.866945	0.805086	0.263037	K14497|1|9e-133|471|bdi:100823766|protein phosphatase 2C [EC:3.1.3.16]		-	-	-	COCehwD019755.1	CN01_14P000430
[truncated: 43 more rows]

## Sheet: Supplementary Data 7
polypeptide_locus_tag	gene_locus_tag	signalling_pathway	curated_family	curated_gene_symbol	expression_class_number	CDS_length	regulation	PMID	detailed_PMID	mean-Cn_BD_0	mean-Cn_BD_4h	mean-Cn_BD_6d	mean-Cn_BD_10d	log2-ratio(Cn_BD_4h/Cn_BD_0)	log2-ratio(Cn_BD_6d/Cn_BD_0)	log2-ratio(Cn_BD_10d/Cn_BD_0)	probability-Cn_BD_0-vs-Cn_BD_4h	probability-Cn_BD_0-vs-Cn_BD_6d	probability-Cn_BD_0-vs-Cn_BD_10d	KEGG_orthology	blast_nr	GO_component	GO_function	GO_biological_process	alt_locus_tag_1	alt_locus_tag_2
[truncated: 154 more rows]

[truncated: 2 more sheets: Supplementary Data 8, abbreviation]
